# Supplementary material for: Non-covalent interactions between sertraline stereoisomers and 2-hydroxypropyl-β-cyclodextrin: a quantum chemistry analysis
Source: Royal Society of Chemistry journal article supplement (doi:10.1039/c9ra10218c), 2020-01-01
Supplement: c9ra10218c1.pdf [file c9ra10218c1.pdf]

# Non-covalent interactions between sertraline stereoisomers and the 2-hydroxypropyl- $\beta$ -cyclodextrin: A quantum chemistry analysis

Joanatan-Michael Bautista-Renedo, Erick Cuevas-Yañez, Horacio Reyes-Pérez  
Rubicelia Vargas, Jorge Garza, and Nelly González-Rivas

## Supporting Information

### 1.- Molecular structures with PBE0/6-31G(d,p).

38

cis-(1S,4S)-SRT E(Ha)= -1632.44152388

|    |               |               |               |
|----|---------------|---------------|---------------|
| Cl | -0.0256557380 | -5.1479492452 | -0.0312626916 |
| Cl | 1.8555967542  | -2.9189009840 | -1.3371198299 |
| N  | -0.2481069505 | 3.0180615937  | -2.0923890460 |
| C  | 0.9939209276  | 3.7506989819  | -2.4576842860 |
| C  | -1.7287650681 | -1.7271197207 | 1.1235749721  |
| C  | -1.4452030264 | -3.0744790404 | 0.9399555296  |
| C  | -0.3477590596 | -3.4705600902 | 0.1787820466  |
| C  | 0.4740370658  | -2.4925605872 | -0.3952007185 |
| C  | 0.1811630336  | -1.1456302285 | -0.2052618574 |
| C  | -0.9204222098 | -0.7453131740 | 0.5501701710  |
| C  | -0.1028456134 | 1.6300095483  | 0.9777164749  |
| C  | 0.0674338122  | 2.8880710754  | 0.3738147532  |
| C  | 1.0851800451  | 3.7470153593  | 0.8126047364  |
| C  | 1.9612861771  | 3.3591252343  | 1.8152805109  |
| C  | 1.8137647311  | 2.1019970817  | 2.3986311446  |
| C  | 0.7896243955  | 1.2586277114  | 1.9896875894  |
| C  | -1.2840505749 | 0.7218527337  | 0.6694146212  |
| C  | -2.0838344378 | 1.1614061676  | -0.5672954434 |
| C  | -2.2253867823 | 2.6769497932  | -0.6505443840 |
| C  | -0.8610113467 | 3.3459118959  | -0.7165214617 |
| H  | -0.9630013333 | 3.1889852228  | -2.8052721934 |
| H  | -0.0627430958 | 2.0114195908  | -2.1108718986 |
| H  | 1.7620173018  | 3.5224151003  | -1.7201759875 |
| H  | 0.7820703692  | 4.8202132349  | -2.4610837573 |
| H  | 1.3136971471  | 3.4304512910  | -3.4498517370 |
| H  | -2.5905974146 | -1.4434873470 | 1.7218270359  |
| H  | -2.0731512052 | -3.8369118353 | 1.3880212064  |
| H  | 0.8527423246  | -0.4088499469 | -0.6368424324 |
| H  | 1.1698517070  | 4.7424118790  | 0.3817474857  |
| H  | 2.7410050351  | 4.0349231561  | 2.1509179804  |
| H  | 2.4872428744  | 1.7866305095  | 3.1894297034  |
| H  | 0.6665576635  | 0.2908302152  | 2.4670895610  |
| H  | -1.9587818344 | 0.8188614537  | 1.5326873466  |
| H  | -1.6058942682 | 0.7564685293  | -1.4726424483 |
| H  | -3.0711684892 | 0.6916522086  | -0.5450105487 |
| H  | -2.8502712683 | 2.9756304129  | -1.5022368041 |
| H  | -2.7268088077 | 3.0589857918  | 0.2454381933  |
| H  | -0.9505491605 | 4.4371942773  | -0.7214185669 |

38

cis-(1R,4R)-SRT E(Ha)= -1632.44114287

|    |             |             |             |
|----|-------------|-------------|-------------|
| Cl | 1.38400532  | 2.88731749  | -1.86023202 |
| Cl | -0.03373480 | 5.13270793  | -0.08419371 |
| N  | -0.79156729 | -3.08831058 | -1.92216109 |
| C  | -1.01849591 | -3.38206535 | -0.42647439 |
| C  | -2.32089595 | -2.70827717 | -0.02169729 |
| C  | -2.16902846 | -1.19130266 | -0.01276578 |
| C  | -1.08071097 | -0.72668001 | 0.96673499  |
| C  | 1.27588791  | -1.22797679 | 1.69536381  |
| C  | 2.37962402  | -2.05889618 | 1.83429931  |
| C  | 2.37585072  | -3.33037209 | 1.26325128  |
| C  | 1.26634341  | -3.74443115 | 0.54114789  |
| C  | 0.16110208  | -2.89824118 | 0.37064253  |
| C  | 0.14700023  | -1.62654240 | 0.97059659  |
| C  | -0.76738395 | 0.73882560  | 0.73704583  |
| C  | 0.08299701  | 1.12925153  | -0.29709709 |
| C  | 0.32014838  | 2.47344979  | -0.56726906 |
| C  | -0.30032501 | 3.45922517  | 0.21078366  |
| C  | -1.14536128 | 3.07301828  | 1.24905043  |
| C  | -1.37709317 | 1.72803709  | 1.50899322  |
| C  | 0.31689053  | -3.82527494 | -2.58633676 |
| H  | -1.10109108 | -4.47298713 | -0.38096042 |
| H  | -2.56921343 | -3.06778550 | 0.98301799  |
| H  | -3.14622537 | -3.02614390 | -0.67228163 |
| H  | -3.11934620 | -0.71963661 | 0.25303963  |
| H  | -1.94105416 | -0.80717345 | -1.01911205 |
| H  | -1.50768819 | -0.81140845 | 1.97693180  |
| H  | 1.27902782  | -0.24758901 | 2.16294624  |
| H  | 3.23900424  | -1.72117383 | 2.40528834  |
| H  | 3.22326585  | -3.99578894 | 1.39260636  |
| H  | 1.24230301  | -4.74909931 | 0.12400132  |
| H  | 0.60210541  | 0.38739761  | -0.89760010 |
| H  | -1.61666257 | 3.84102302  | 1.85293512  |
| H  | -2.03927219 | 1.45187820  | 2.32537178  |
| H  | 0.36044100  | -3.52778042 | -3.63473741 |
| H  | 0.12223920  | -4.89545761 | -2.51015884 |
| H  | 1.25046646  | -3.57678108 | -2.08339575 |
| H  | -0.62739880 | -2.08183583 | -2.01112117 |
| H  | -1.66756425 | -3.27825095 | -2.41718154 |

38

trans-(1R,4S)-SRT E(Ha)= -1632.43746341

|    |             |             |             |
|----|-------------|-------------|-------------|
| Cl | 0.03789968  | -5.32525597 | -0.02432641 |
| Cl | -1.61249024 | -3.33639348 | 1.84998642  |
| N  | 0.81979123  | 4.78657656  | 0.66636023  |
| C  | 1.22367196  | 5.10637842  | -0.73439482 |
| C  | 1.43714895  | -1.73238475 | -1.05430927 |
| C  | 1.21992883  | -3.10304459 | -0.98085703 |
| C  | 0.28492831  | -3.62342395 | -0.08981387 |
| C  | -0.43843876 | -2.74897784 | 0.73256169  |
| C  | -0.21389480 | -1.37842623 | 0.65182796  |

|   |             |             |             |
|---|-------------|-------------|-------------|
| C | 0.72447053  | -0.85418311 | -0.23835890 |
| C | -0.25278649 | 1.47183069  | -0.51108522 |
| C | -0.44408512 | 2.71474603  | 0.11422282  |
| C | -1.65267427 | 3.40439603  | -0.06248834 |
| C | -2.64109142 | 2.91645063  | -0.90372346 |
| C | -2.43100419 | 1.71076801  | -1.57047424 |
| C | -1.25962901 | 0.99731222  | -1.36032557 |
| C | 0.99805497  | 0.63592738  | -0.27762670 |
| C | 1.72904192  | 1.08295736  | 0.99370842  |
| C | 1.95799085  | 2.58821317  | 0.97295387  |
| C | 0.61704428  | 3.30460875  | 1.01293813  |
| H | 2.22004285  | 4.71220894  | -0.92385295 |
| H | 0.49991929  | 4.65201303  | -1.41000507 |
| H | 1.22812101  | 6.19030442  | -0.85357334 |
| H | -0.05666531 | 5.27455831  | 0.86302324  |
| H | 1.51090962  | 5.17093295  | 1.31647246  |
| H | 2.17232053  | -1.34929527 | -1.75719667 |
| H | 1.77397795  | -3.78526346 | -1.61658664 |
| H | -0.79852545 | -0.72369859 | 1.29142932  |
| H | -1.85301862 | 4.32887790  | 0.48081728  |
| H | -3.56987019 | 3.46328829  | -1.02983405 |
| H | -3.19262981 | 1.31562980  | -2.23534877 |
| H | -1.11999933 | 0.03714615  | -1.84777527 |
| H | 1.67678948  | 0.81505951  | -1.12539038 |
| H | 1.14492405  | 0.79868428  | 1.87777094  |
| H | 2.68687777  | 0.56139898  | 1.07088636  |
| H | 2.57877119  | 2.90538827  | 1.81896902  |
| H | 2.50145881  | 2.83864388  | 0.05384487  |
| H | 0.25337847  | 3.34206765  | 2.04847774  |

38

trans-(1S,4R)-SRT E(Ha)= -1632.43746341

|    |             |             |             |
|----|-------------|-------------|-------------|
| Cl | 0.25833980  | -5.30237000 | 0.42883204  |
| Cl | -1.32449061 | -3.49073945 | -1.66999877 |
| N  | 0.73161835  | 4.77969114  | -0.78974365 |
| C  | 1.01210057  | 5.18740614  | 0.61832670  |
| C  | 1.44583435  | -1.60323652 | 1.34179657  |
| C  | 1.28519251  | -2.98358130 | 1.33384854  |
| C  | 0.43693201  | -3.59083048 | 0.41151097  |
| C  | -0.25685083 | -2.79415424 | -0.50940838 |
| C  | -0.08948337 | -1.41315052 | -0.49369515 |

|   |             |             |             |
|---|-------------|-------------|-------------|
| C | 0.76212688  | -0.80194942 | 0.42772005  |
| C | -0.31541729 | 1.49534557  | 0.48922046  |
| C | -0.50095537 | 2.69419770  | -0.21841752 |
| C | -1.74264332 | 3.34503059  | -0.17237233 |
| C | -2.77544549 | 2.86540712  | 0.61883582  |
| C | -2.57575987 | 1.70657190  | 1.36692683  |
| C | -1.36765396 | 1.02883896  | 1.28629633  |
| C | 0.97817705  | 0.69783773  | 0.39791278  |
| C | 1.78604002  | 1.10077229  | -0.84124669 |
| C | 1.96203203  | 2.61239530  | -0.89191321 |
| C | 0.60437507  | 3.27506226  | -1.06831439 |
| H | 1.99841032  | 4.83186099  | 0.90950210  |
| H | 0.24649944  | 4.75084859  | 1.25857808  |
| H | 0.98165124  | 6.27595223  | 0.67515236  |
| H | -0.14140568 | 5.22482326  | -1.08069928 |
| H | 1.45998203  | 5.15369353  | -1.40426739 |
| H | 2.11350631  | -1.15162037 | 2.07087575  |
| H | 1.81639842  | -3.60598118 | 2.04585899  |
| H | -0.65015876 | -0.81968810 | -1.20993865 |
| H | -1.93202075 | 4.23050718  | -0.78066279 |
| H | -3.72942667 | 3.38197143  | 0.64388198  |
| H | -3.37229272 | 1.31867830  | 1.99409052  |
| H | -1.23271257 | 0.10295313  | 1.83724641  |
| H | 1.58448352  | 0.95192534  | 1.28073831  |
| H | 1.27896681  | 0.74566628  | -1.74697235 |
| H | 2.76400127  | 0.61238877  | -0.81842941 |
| H | 2.63153238  | 2.90522327  | -1.70903224 |
| H | 2.42880172  | 2.93381968  | 0.04705563  |
| H | 0.31783687  | 3.24462918  | -2.12798372 |

147

B-CD E(Ha)= -4270.84685357

|   |             |             |             |
|---|-------------|-------------|-------------|
| O | -4.52024769 | 3.97281391  | 1.22337825  |
| O | -1.22942712 | 4.90429399  | -0.08664288 |
| O | 0.31407545  | 6.01768699  | 1.22962887  |
| O | 3.06653242  | 4.02255867  | -0.13176534 |
| O | 4.93538479  | 3.53267680  | 1.14240400  |
| O | 5.05261501  | 0.11090338  | -0.15760895 |
| O | 5.83954612  | -1.63141945 | 1.14660325  |
| O | 2.33439168  | -5.52861962 | 1.25121310  |
| O | -1.01979492 | -4.95518579 | -0.10024225 |

|   |             |             |             |
|---|-------------|-------------|-------------|
| O | -2.90855876 | -5.30369698 | 1.19120651  |
| O | -4.50589867 | -2.29506240 | -0.15225720 |
| O | -5.99219419 | -1.05889012 | 1.12004180  |
| O | -6.04234050 | -1.82671401 | -2.42434248 |
| O | -5.82403608 | 0.91030703  | -2.48019524 |
| O | -4.59626936 | 2.09193450  | -0.12170510 |
| O | -4.35062018 | -4.07521314 | -2.45276530 |
| O | -2.34999966 | -5.94905529 | -2.33402012 |
| O | -5.19127793 | -4.69705793 | 2.56794990  |
| O | 0.46160930  | -6.02925790 | -2.36818093 |
| O | 3.17441312  | -5.61434439 | -2.27540517 |
| O | 0.44180937  | -6.88115832 | 2.68885705  |
| O | 6.26305008  | -1.00170446 | -2.39938284 |
| O | 4.88594468  | -3.37935798 | -2.44477219 |
| O | 5.65829627  | 1.75005252  | -2.48596665 |
| O | 4.66714912  | 4.30886993  | -2.39025457 |
| O | 6.74043654  | 2.00256609  | 2.51987655  |
| O | 2.62780100  | 6.43749331  | 2.62510948  |
| O | -0.45172066 | 6.41213313  | -2.29324230 |
| O | 2.16581637  | 5.59767472  | -2.41148579 |
| O | -2.99706089 | 5.21767459  | -2.38065019 |
| O | -5.26301236 | 3.66829589  | -2.31262995 |
| O | -3.41820778 | 6.02188992  | 2.66408988  |
| O | -6.96095076 | 1.09398335  | 2.51605461  |
| O | 5.76287216  | -3.97373755 | 2.57021456  |
| O | 3.23320091  | -3.88149728 | -0.10243439 |
| C | -3.09550380 | 4.11087986  | 1.22043854  |
| C | -2.64456384 | 4.94444456  | 0.02007489  |
| C | -3.21597872 | 4.38800765  | -1.27093999 |
| C | -4.71952930 | 4.24408584  | -1.14249688 |
| C | -5.07460648 | 3.39152731  | 0.07070955  |
| C | -0.50801917 | 6.08805732  | 0.09226808  |
| C | 1.31014152  | 4.99008809  | 1.20819066  |
| C | 2.21927682  | 5.15526697  | -0.01051874 |
| C | 1.40243027  | 5.25451683  | -1.28572204 |
| C | 0.35731746  | 6.34236560  | -1.13723938 |
| C | 4.44639135  | 4.19746818  | 0.00500392  |
| C | 5.14900267  | 3.65441199  | -1.23471494 |
| C | 4.94545505  | 2.15656900  | -1.34816686 |
| C | 5.41226369  | 1.48154004  | -0.07169293 |
| C | 4.75012529  | 2.11361467  | 1.15336354  |
| C | 6.05026565  | -0.85638359 | -0.00644380 |
| C | 4.61322336  | -2.36888665 | 1.17562481  |
| C | 4.52860060  | -3.30515625 | -0.03055045 |
| C | 4.76104140  | -2.54565254 | -1.32350202 |
| C | 6.05835461  | -1.76694683 | -1.22951651 |
| C | 3.09856974  | -5.25773162 | 0.10374405  |
| C | 2.42253863  | -5.88540055 | -1.11037149 |
| C | 1.00681342  | -5.36489143 | -1.25952632 |
| C | 0.23636336  | -5.60468743 | 0.02587857  |
| C | 0.99088924  | -5.03582430 | 1.22828898  |
| C | -2.18554364 | -5.70992615 | 0.05682442  |
| C | -3.06125327 | -5.54841641 | -1.18111634 |
| C | -3.52779884 | -4.11271030 | -1.31724670 |
| C | -4.23612740 | -3.68475590 | -0.04503294 |
| C | -3.36039548 | -3.94578458 | 1.18131735  |
| C | -5.82625537 | -1.85466127 | -0.02641408 |
| C | -5.20672493 | 0.13713958  | 1.15603853  |

|   |             |             |             |
|---|-------------|-------------|-------------|
| C | -5.51486514 | 1.01119331  | -0.06031555 |
| C | -5.37177956 | 0.21911688  | -1.34635665 |
| C | -6.20677785 | -1.04319193 | -1.26034034 |
| C | -5.58262772 | 0.81771617  | 2.46145272  |
| C | -4.12978602 | -3.77836752 | 2.48108830  |
| C | 0.38547895  | -5.48280810 | 2.54846008  |
| C | 4.64082531  | -3.12887362 | 2.49105177  |
| C | 5.38187170  | 1.64401343  | 2.45305116  |
| C | 2.06902530  | 5.15143282  | 2.51485013  |
| C | -2.76319609 | 4.78308516  | 2.54219605  |
| H | -2.62113877 | 3.12117490  | 1.16687089  |
| H | -2.99032972 | 5.97712570  | 0.16197545  |
| H | -2.78383779 | 3.38544848  | -1.42695330 |
| H | -5.14906196 | 5.24466373  | -0.98256530 |
| H | -6.15747572 | 3.38166438  | 0.23881362  |
| H | -1.18720387 | 6.92908106  | 0.27236502  |
| H | 0.83138006  | 4.00190237  | 1.16526592  |
| H | 2.81494145  | 6.06881790  | 0.11913255  |
| H | 0.88319350  | 4.29239075  | -1.43002305 |
| H | 0.87627655  | 7.30086145  | -0.98479340 |
| H | 4.68682340  | 5.25575496  | 0.15728464  |
| H | 6.22600400  | 3.84763552  | -1.11642874 |
| H | 3.86591495  | 1.96060468  | -1.45905244 |
| H | 6.50103247  | 1.58790904  | 0.02525503  |
| H | 3.67786558  | 1.87327806  | 1.14299013  |
| H | 7.02818971  | -0.38197160 | 0.13343103  |
| H | 3.75800159  | -1.67922591 | 1.15298978  |
| H | 5.29162564  | -4.08741144 | 0.07905456  |
| H | 3.93350843  | -1.82721734 | -1.44696267 |
| H | 6.88232963  | -2.48541172 | -1.10267958 |
| H | 4.07673989  | -5.71628938 | 0.28764780  |
| H | 2.37452879  | -6.97154667 | -0.93931322 |
| H | 1.05414275  | -4.27583031 | -1.42632126 |
| H | 0.09791768  | -6.68343675 | 0.17831738  |
| H | 0.99287819  | -3.93899087 | 1.16204550  |
| H | -1.94117671 | -6.76463631 | 0.22688209  |
| H | -3.94686294 | -6.18780282 | -1.04629133 |
| H | -2.64021934 | -3.47037176 | -1.44231305 |
| H | -5.17072724 | -4.25078336 | 0.06606392  |
| H | -2.50016441 | -3.26238739 | 1.15727359  |
| H | -6.50470706 | -2.70514689 | 0.10541079  |
| H | -4.13694136 | -0.11420832 | 1.15318432  |
| H | -6.54335801 | 1.38556361  | 0.02911735  |
| H | -4.31287902 | -0.07153812 | -1.44869296 |
| H | -7.26220853 | -0.75072719 | -1.15176390 |
| H | -6.06346174 | -1.19723182 | -3.15862878 |
| H | -5.47303546 | 1.82074831  | -2.46175999 |
| H | -5.26152404 | 0.17943333  | 3.29882088  |
| H | -5.05669422 | 1.77408807  | 2.53508152  |
| H | -4.80595404 | -3.21271130 | -2.48925397 |
| H | -2.85563999 | -5.59375085 | -3.07849866 |
| H | -3.42945180 | -3.88401268 | 3.32381061  |
| H | -4.56502486 | -2.77542465 | 2.51696802  |
| H | -4.79423762 | -5.56919999 | 2.45654879  |
| H | -0.49701001 | -5.85036190 | -2.40841786 |
| H | 2.58276712  | -5.82558999 | -3.01131061 |
| H | 0.90798537  | -4.96924528 | 3.37008741  |
| H | -0.66985270 | -5.19635023 | 2.57739588  |

|   |             |             |             |
|---|-------------|-------------|-------------|
| H | 1.37054463  | -7.11957839 | 2.58270804  |
| H | 3.75187650  | -3.76244948 | 2.56177742  |
| H | 6.02389623  | -1.58820447 | -3.13061850 |
| H | 4.17334413  | -4.04598871 | -2.42952365 |
| H | 5.71015784  | 0.77561662  | -2.49949068 |
| H | 4.96175585  | 3.76194952  | -3.13193704 |
| H | 4.80880778  | 2.05975099  | 3.29598101  |
| H | 5.33158893  | 0.55255829  | 2.50594561  |
| H | 6.76707341  | 2.95898841  | 2.39666692  |
| H | 2.89524712  | 4.43512646  | 2.54391703  |
| H | 1.38730839  | 4.93023493  | 3.35040456  |
| H | 1.89324938  | 7.05359852  | 2.51775946  |
| H | 0.16242008  | 6.32725409  | -3.03609960 |
| H | 2.95133998  | 5.01996378  | -2.45343862 |
| H | -2.05903534 | 5.48672669  | -2.39914696 |
| H | -4.81218652 | 4.11245348  | -3.04451885 |
| H | -1.68787290 | 4.97856908  | 2.58846640  |
| H | -3.02782496 | 4.09961867  | 3.36356513  |
| H | -4.35708734 | 5.83636639  | 2.54260555  |
| H | -7.40509880 | 0.24924745  | 2.37537657  |
| H | 6.53071199  | -3.40621920 | 2.43249905  |
| H | 4.61736121  | -2.40400238 | 3.31913683  |





2-HP-B-CD E(Ha)= -5621.40163046

|   |               |               |               |
|---|---------------|---------------|---------------|
| O | -2.7727459824 | 5.2903013130  | -2.2927533349 |
| O | -4.4599789908 | 2.3690865562  | -0.8692675484 |
| O | -5.8966032593 | 1.1525076940  | -2.2228759326 |
| O | -4.6341258013 | -2.0096580908 | -0.8762865281 |
| O | -4.5527577281 | -3.8548844314 | -2.2766337213 |
| O | -1.3189941073 | -4.8770953886 | -0.8975050858 |
| O | 0.1841016580  | -5.9683105423 | -2.2844268657 |
| O | 2.9871858932  | -4.0712054132 | -0.8886027753 |
| O | 4.7908551817  | -3.5893100650 | -2.2626090338 |
| O | 5.0505453959  | -0.2033821422 | -0.8938829626 |
| O | 5.8031504636  | 1.4949397286  | -2.2804010751 |
| O | 3.3034030501  | 3.8124717301  | -0.9440124935 |
| O | 2.4109350539  | 5.4159895804  | -2.3592515046 |
| O | 3.3527622755  | 5.5556911862  | 1.1280525733  |
| O | 0.5208171146  | 6.0404160011  | 1.2627571032  |
| O | -0.9278405825 | 4.9606627808  | -0.9282646871 |
| O | 4.9734163666  | 3.3611715015  | 1.3122998965  |
| O | 6.3653141202  | 0.8453244105  | 1.2312975966  |
| O | 5.6824947766  | 3.8222383172  | -3.7367004060 |
| O | 5.7107296705  | -1.8083733090 | 1.3540122091  |
| O | 4.6200252735  | -4.4670301806 | 1.2404635215  |
| O | 6.5586639188  | -2.0611696373 | -3.6918756388 |
| O | -0.6119558710 | -6.4298307880 | 1.2120067697  |
| O | 2.1446150686  | -5.6208156766 | 1.3388990736  |
| O | -3.0523505080 | -5.2025359464 | 1.3319553478  |
| O | -5.3954330908 | -3.5420076035 | 1.2257502730  |
| O | -3.4297827173 | -5.8910098132 | -3.7306620252 |
| O | -6.8259445301 | -1.0051539724 | -3.6451664773 |
| O | -6.0687980522 | 2.0123506367  | 1.2848979236  |
| O | -5.9087674207 | -0.8565327637 | 1.3875301132  |
| O | -4.3413655748 | 4.1323048445  | 1.3538573437  |
| O | -2.2113229520 | 6.0575041404  | 1.1960130425  |
| O | -5.0419186933 | 4.6604331503  | -3.6907700066 |
| O | 0.5033854802  | 6.7400254664  | -3.8135025481 |
| O | 2.4830262271  | -6.3711798521 | -3.7179550050 |
| O | -7.0448347385 | 4.4406737623  | 2.3423207835  |
| O | -0.9282200089 | 8.3731772997  | 2.1721202938  |
| O | 5.9376138410  | 5.9494853162  | 2.1799081711  |
| O | 8.2879126162  | -0.9131662952 | 2.3199877955  |
| O | 4.4570695357  | -7.0813201013 | 2.2858959861  |
| O | -2.7684031257 | -7.9372702703 | 2.2307649529  |
| O | -7.9002719081 | -2.7613926472 | 2.2601750921  |
| C | -3.2431083251 | 3.9400488257  | -2.2456671382 |
| C | -4.1453371041 | 3.7461488340  | -1.0286583454 |
| C | -3.4644033816 | 4.2026213935  | 0.2560573711  |
| C | -2.9708337151 | 5.6282190992  | 0.0900689071  |
| C | -2.0808437873 | 5.7260124870  | -1.1531145537 |
| C | -5.7815955512 | 1.9477142270  | -1.0730263491 |
| C | -5.1280324191 | -0.0538697314 | -2.2104489486 |
| C | -5.5177337449 | -0.9035224995 | -1.0023882902 |
| C | -5.4291266922 | -0.1098375076 | 0.2954895706  |
| C | -6.2339839365 | 1.1709923095  | 0.1673162225  |
| C | -5.1244316437 | -3.3005233451 | -1.1220948690 |
| C | -4.8207406756 | -4.1690624688 | 0.1027097888  |
| C | -3.3202291342 | -4.3391707916 | 0.2540075226  |
| C | -2.7324842515 | -4.8738014933 | -1.0465741875 |

|   |               |               |               |
|---|---------------|---------------|---------------|
| C | -3.1311349944 | -4.0098620983 | -2.2415598210 |
| C | -0.6142906820 | -6.0660547493 | -1.1355888289 |
| C | 1.1917967459  | -4.9538284372 | -2.2454462176 |
| C | 2.1053333969  | -5.1754537647 | -1.0414107558 |
| C | 1.3101551105  | -5.2983930529 | 0.2530888459  |
| C | 0.2452280358  | -6.3682783777 | 0.0958263821  |
| C | 4.3581672740  | -4.2635964420 | -1.1114267994 |
| C | 5.1188796954  | -3.7695202627 | 0.1230382299  |
| C | 4.9482855251  | -2.2681638686 | 0.2646821674  |
| C | 5.3629141496  | -1.5829575087 | -1.0320119893 |
| C | 4.6304298538  | -2.1681051213 | -2.2378920683 |
| C | 6.0565556420  | 0.7464695266  | -1.1215040627 |
| C | 6.1378814666  | 1.6603164248  | 0.1050819797  |
| C | 4.8569528175  | 2.4645461901  | 0.2341250261  |
| C | 4.5790815539  | 3.1986561112  | -1.0722224210 |
| C | 4.5860157058  | 2.2463320641  | -2.2664265689 |
| C | 3.1819172052  | 5.1841304199  | -1.2108691890 |
| C | 1.0630200512  | 4.9402584840  | -2.2994385889 |
| C | 0.3455206091  | 5.5672023988  | -1.1058057224 |
| C | 1.1240073987  | 5.3618024949  | 0.1880935295  |
| C | 2.5482474311  | 5.8556880195  | 0.0113868503  |
| C | 0.4440058617  | 5.3470769628  | -3.6263895756 |
| C | 4.5620457798  | 2.9831317828  | -3.5951597331 |
| C | 5.2097881287  | -1.6850885492 | -3.5573798298 |
| C | 1.9323468569  | -5.0856095017 | -3.5660212092 |
| C | -2.7729959262 | -4.6574649941 | -3.5688429169 |
| C | -5.4492829825 | -0.7396587813 | -3.5279021888 |
| C | -3.9880197946 | 3.7385990879  | -3.5550731691 |
| C | 3.6213803468  | 6.6242943315  | 2.0295684936  |
| C | 7.3342333318  | 1.3027659822  | 2.1688239690  |
| C | 5.5780666530  | -4.9427968284 | 2.1799386354  |
| C | -0.3943042033 | -7.4974543558 | 2.1281665506  |
| C | -6.1091543723 | -4.3782564146 | 2.1301225085  |
| C | -7.1270274111 | 2.0273952866  | 2.2373607492  |
| C | -2.8594703413 | 6.9217703498  | 2.1233782027  |
| C | -6.9603768835 | 3.2628076144  | 3.1116128878  |
| C | -6.9653895379 | -3.4899693139 | 3.0223302373  |
| C | -1.6319558790 | -7.6289825776 | 3.0051816208  |
| C | 4.9027209044  | -5.9886653763 | 3.0564312195  |
| C | 7.7116748553  | 0.1333636489  | 3.0676563446  |
| C | 4.7731092901  | 6.2027384093  | 2.9318437686  |
| C | -1.7889505075 | 7.5946718418  | 2.9715752470  |
| C | -8.0492383627 | 3.3182608909  | 4.1670090839  |
| C | -2.4239641692 | 8.5118004909  | 4.0002049138  |
| C | 5.0941901777  | 7.2984757441  | 3.9311408590  |
| C | 8.7226935264  | 0.5696962312  | 4.1117069110  |
| C | 5.8733735628  | -6.5179094729 | 4.0957528307  |
| C | -1.4475311506 | -8.7396067968 | 4.0225158006  |
| C | -7.7355791274 | -4.3284060450 | 4.0254974191  |
| H | 0.9557907613  | 4.8045984395  | -4.4358988261 |
| H | 1.2399927687  | -4.8390433405 | -4.3853855575 |
| H | 4.1637573154  | 5.6231126944  | -1.4178094919 |
| H | 2.5345793138  | 6.9408159517  | -0.1626487172 |
| H | 1.1638981719  | 4.2815429623  | 0.3955260064  |
| H | -0.4159118845 | 5.7625632460  | 1.2869365241  |
| H | 0.2311781745  | 6.6428179350  | -1.2966203291 |
| H | 1.0531228837  | 3.8464425733  | -2.1934927149 |
| H | -0.6126668401 | 5.0656514097  | -3.6355391276 |

|   |               |               |               |
|---|---------------|---------------|---------------|
| H | 7.0198708453  | 0.2531974235  | -1.2896798802 |
| H | 6.9823516956  | 2.3491580022  | -0.0376523678 |
| H | 4.0310836032  | 1.7594419068  | 0.4137501645  |
| H | 4.1837832482  | 3.9365090513  | 1.2941545378  |
| H | 5.3534780198  | 3.9608169162  | -1.2327568773 |
| H | 3.7244171712  | 1.5681122397  | -2.1920316938 |
| H | 4.5014316923  | 2.2431806954  | -4.4077027015 |
| H | 3.6745669596  | 3.6204071286  | -3.6413377546 |
| H | 6.4550504397  | 3.2523103964  | -3.6403325828 |
| H | 4.5735377140  | -5.3228610154 | -1.2880300272 |
| H | 6.1843936842  | -3.9990309783 | -0.0186738483 |
| H | 3.8803526650  | -2.0631271814 | 0.4350088187  |
| H | 5.6549418688  | -0.8326848521 | 1.3505052662  |
| H | 6.4425146085  | -1.7153052913 | -1.1849018347 |
| H | 3.5643186211  | -1.9092375228 | -2.1722406383 |
| H | 4.5926169157  | -2.0788015195 | -4.3793162145 |
| H | 5.1750680650  | -0.5926122930 | -3.5912594864 |
| H | 6.5760915914  | -3.0216968518 | -3.6017863074 |
| H | -1.3081105370 | -6.8922453957 | -1.3242934480 |
| H | 0.7323425363  | -7.3413685010 | -0.0582876150 |
| H | 0.8020803421  | -4.3392678913 | 0.4359306581  |
| H | 2.8712536677  | -4.9672825985 | 1.3453882714  |
| H | 2.6772904409  | -6.0985438414 | -1.2065202617 |
| H | 0.7256523379  | -3.9616525149 | -2.1670822565 |
| H | 2.7629487178  | -4.3747521281 | -3.5892972620 |
| H | -6.2034372579 | -3.2724067104 | -1.3079086100 |
| H | -5.2803190443 | -5.1548722492 | -0.0545589059 |
| H | -2.8841048714 | -3.3466312356 | 0.4444700973  |
| H | -2.0889689699 | -5.3670205380 | 1.3349669835  |
| H | -3.0991457359 | -5.8946569194 | -1.2194846862 |
| H | -2.6462074140 | -3.0274714777 | -2.1543115966 |
| H | -3.0164772835 | -3.9559289577 | -4.3812920266 |
| H | -1.6984909597 | -4.8587961325 | -3.5963715354 |
| H | -4.3722662670 | -5.7027916757 | -3.6450605611 |
| H | -6.4378919700 | 2.8086999488  | -1.2392822185 |
| H | -7.2958749045 | 0.9168406423  | 0.0415638359  |
| H | -4.3760362310 | 0.1664767225  | 0.4571433942  |
| H | -5.4457310015 | -1.7169162249 | 1.3729410172  |
| H | -6.5487518590 | -1.2546140389 | -1.1442082186 |
| H | -4.0559909894 | 0.1818326578  | -2.1555148478 |
| H | -4.9310141922 | -1.7015685619 | -3.5724541129 |
| H | -5.0838029896 | -0.1089559553 | -4.3525515272 |
| H | -7.2697374316 | -0.1536652253 | -3.5503970472 |
| H | -1.8165235399 | 6.7711462821  | -1.3465543897 |
| H | -3.8335243859 | 6.2936575442  | -0.0547410328 |
| H | -2.5882768493 | 3.5589057071  | 0.4278272896  |
| H | -4.7108253623 | 3.2275945189  | 1.3674237783  |
| H | -5.0627332262 | 4.3304932823  | -1.1817966030 |
| H | -2.3933340037 | 3.2461423733  | -2.1795648507 |
| H | -4.4307744778 | 2.7388463335  | -3.5708269688 |
| H | -3.2698858294 | 3.8147366433  | -4.3856888167 |
| H | -4.6402447310 | 5.5346389075  | -3.6166826620 |
| H | 1.4361495949  | 6.9770504094  | -3.7441554500 |
| H | 1.7446725044  | -6.9870437876 | -3.6366712006 |
| H | -7.1056035883 | 1.1059363460  | 2.8322482942  |
| H | -8.0915654419 | 2.0945595028  | 1.7140733676  |
| H | -5.4041234105 | -4.9796517379 | 2.7175276155  |
| H | -6.7708678114 | -5.0502917153 | 1.5650202932  |

|   |               |               |              |
|---|---------------|---------------|--------------|
| H | 0.5043545039  | -7.2990077146 | 2.7253820292 |
| H | -0.2562419129 | -8.4361107873 | 1.5725733296 |
| H | 5.9642145263  | -4.1060072937 | 2.7750474617 |
| H | 6.4127548063  | -5.4180627658 | 1.6449563490 |
| H | 6.9266706854  | 2.1409804620  | 2.7474626316 |
| H | 8.2335862427  | 1.6395347802  | 1.6334836070 |
| H | 2.7201900296  | 6.8584195528  | 2.6096897688 |
| H | 3.9256652659  | 7.5156965368  | 1.4623040923 |
| H | -3.5618742589 | 6.3471552577  | 2.7397818855 |
| H | -3.4137955539 | 7.6982602750  | 1.5770362058 |
| H | -5.9779451822 | 3.1944255859  | 3.6085451734 |
| H | -1.2236973725 | 6.8032496038  | 3.4921271038 |
| H | 4.4592947453  | 5.2964621023  | 3.4769480402 |
| H | 6.7945625550  | -0.2119080347 | 3.5741570429 |
| H | 4.0541329471  | -5.5035748059 | 3.5676831826 |
| H | -1.7727989342 | -6.6721705416 | 3.5357350649 |
| H | -6.2907528492 | -2.8062170130 | 3.5647529394 |
| H | 6.2544174592  | -5.7157286215 | 4.7344456882 |
| H | 6.7198036067  | -7.0087826231 | 3.6050628053 |
| H | 5.3727558341  | -7.2587836541 | 4.7229376606 |
| H | -0.5802866649 | -8.5567618305 | 4.6636617064 |
| H | -1.3120641153 | -9.6987873916 | 3.5127722020 |
| H | -2.3385844732 | -8.8152491746 | 4.6495430211 |
| H | -7.0638090224 | -4.9171349413 | 4.6569870952 |
| H | -8.4151678815 | -5.0098916242 | 3.5039780771 |
| H | -8.3370920550 | -3.6773348304 | 4.6635961458 |
| H | -8.0342870506 | 2.4309241101  | 4.8065750214 |
| H | -9.0320575095 | 3.3918806345  | 3.6907176649 |
| H | -7.9112147296 | 4.2037866487  | 4.7912367323 |
| H | -3.1026583306 | 7.9649838089  | 4.6612507374 |
| H | -2.9853256485 | 9.3072888642  | 3.4999487089 |
| H | -1.6449433709 | 8.9800603659  | 4.6057831172 |
| H | 4.2284251869  | 7.5393707201  | 4.5548899889 |
| H | 5.4129807357  | 8.2048669455  | 3.4067156766 |
| H | 5.9144578001  | 6.9780436780  | 4.5771933003 |
| H | 8.3323635044  | 1.3798979924  | 4.7344447511 |
| H | 9.6423366059  | 0.9111895550  | 3.6260692788 |
| H | 8.9762610180  | -0.2764757568 | 4.7540172810 |
| H | -6.2053845577 | 4.5495528311  | 1.8718592883 |
| H | -0.3206180686 | 7.7718282483  | 1.7170776199 |
| H | 5.8306043115  | 5.0888470956  | 1.7485006989 |
| H | 7.5741432509  | -1.3775614854 | 1.8586954502 |
| H | 3.6479781227  | -6.8114057774 | 1.8271696519 |
| H | -3.0561463682 | -7.1250082000 | 1.7885984450 |
| H | -7.4285410742 | -2.0322386425 | 1.8309492386 |

B-CD:cis-(1S,4S)-SRT\_1\_Cl E(Ha)= -5903.32668777

|   |               |               |               |
|---|---------------|---------------|---------------|
| O | -6.9803486124 | -3.0799014574 | -2.8044246338 |
| O | 5.5149237708  | -5.3988349652 | 1.7523591814  |
| O | 7.3641370281  | -1.6768954125 | -2.5754959373 |
| O | 4.8544916521  | 0.8076553240  | 2.0875346795  |
| O | 4.0996007063  | 1.7146349147  | -0.4967261628 |
| O | 2.3266213088  | 2.9989127709  | -4.1681518731 |
| O | 4.7359486139  | 2.4229956822  | -3.0289871998 |
| O | 3.0223319313  | -0.9891305167 | -7.3400746937 |
| O | -3.2646479514 | -1.0790548111 | -7.3373834870 |
| O | -0.1050643990 | 3.3027326778  | -5.4680629247 |
| O | -2.6235500635 | 3.0167169656  | -4.4281515909 |
| O | -5.3278650380 | 1.0859409181  | -0.2723372821 |
| O | -4.7461711112 | 2.3387647178  | -2.6903101954 |
| O | -4.9842103678 | -6.2433918885 | 1.9245087918  |
| O | -6.2373264997 | -0.5670844898 | 1.8362113488  |
| O | -4.7800464392 | -1.5347241758 | 3.9657185419  |
| O | 0.4257772785  | -7.1623595547 | 4.4888318830  |
| O | -2.7858175639 | -2.4309847486 | 5.7861778310  |
| O | -0.0255475672 | -2.3478071290 | 6.1268985772  |
| O | 4.4481371696  | -1.8753007642 | 1.4981851376  |
| O | 4.6213291544  | -1.0214166285 | 4.2739904059  |
| O | 2.8822699322  | -2.3680061619 | 5.9852658959  |
| O | 3.3568388907  | -4.8165729637 | 3.3592295752  |
| O | 1.4528041628  | -3.6867891360 | 4.0365613857  |
| O | -1.7539158138 | -5.4584725473 | 4.0877515168  |
| O | -2.8211255570 | -3.5742999063 | 3.2653750164  |
| O | -5.3329257648 | -3.8579364554 | 0.6169808163  |
| O | -4.8531937512 | -1.7570865661 | -0.2240249281 |
| O | -5.2934491108 | -1.0663032282 | -3.7992139609 |
| O | -3.3809480803 | 0.2377835664  | -3.8509620215 |
| O | -0.8576062689 | -0.0955217106 | -6.4741863865 |
| O | 0.7443762647  | 0.6998249839  | -5.0031437816 |
| O | 4.1330237458  | -0.6718946391 | -4.8117985049 |
| O | 4.1278555256  | -0.2918287121 | -2.5439303177 |
| O | 6.2337057631  | -1.8436619039 | 0.0118482762  |
| C | 6.2073922762  | -2.4209016763 | -2.2732675246 |
| C | 2.4421749290  | -1.5459866522 | -6.1866602656 |
| C | -2.6354855960 | -1.5923368961 | -6.1910029325 |
| C | -5.5765451477 | -3.1777215410 | -2.7977423183 |
| C | -3.9161199416 | -5.6014266533 | 1.2746617743  |
| C | 0.2494085468  | -6.4089404006 | 3.3140566101  |
| C | 4.3114310827  | -4.9052325683 | 1.2246985745  |
| C | 3.5504625285  | -3.0185113745 | 4.9248744575  |
| C | 3.8013006641  | -2.0564373846 | 3.7819884150  |
| C | 4.4242916217  | -2.7815423533 | 2.6013087578  |
| C | 3.5925595701  | -4.0011087067 | 2.2118094582  |
| C | 2.6983163378  | -4.1839726663 | 4.4296577624  |
| C | -0.4639089138 | -5.0966394252 | 3.5878590282  |
| C | 0.2721950506  | -4.2346870431 | 4.6119417000  |
| C | -0.5770525732 | -3.0527857197 | 5.0439971920  |
| C | -1.9483005624 | -3.5281109103 | 5.4829699375  |
| C | -2.5953416897 | -4.3732030052 | 4.3917325952  |
| C | -4.0884148994 | -4.0913258585 | 1.2855140027  |
| C | -4.1253103447 | -3.5233060558 | 2.7034614028  |
| C | -4.5543658138 | -2.0674578131 | 2.6879741143  |
| C | -5.8623012259 | -1.9287777784 | 1.9354593527  |

|   |               |               |               |
|---|---------------|---------------|---------------|
| C | -5.7534817435 | -2.5245632263 | 0.5368757804  |
| C | -5.2635279748 | 1.0233508631  | -2.6319403211 |
| C | -4.8394672704 | 0.3248556571  | -1.3522371844 |
| C | -5.3647097425 | -1.0983985960 | -1.3706298113 |
| C | -4.9159120620 | -1.8199230481 | -2.6426322596 |
| C | -4.7814811576 | 0.2392577673  | -3.8475582992 |
| C | -1.8125177979 | -0.5197031283 | -5.4935010762 |
| C | -2.6907100961 | 0.6427934981  | -5.0223264087 |
| C | -1.8602855698 | 1.8623921841  | -4.6636910275 |
| C | -0.9214445660 | 2.1959951057  | -5.8052103778 |
| C | -0.0484180706 | 0.9898089421  | -6.1280366820 |
| C | 4.2047865183  | 1.5770333173  | -4.0428522266 |
| C | 2.6916764036  | 1.6456412692  | -4.0500750102 |
| C | 2.1541341695  | 0.7336897353  | -5.1368164370 |
| C | 2.7079471946  | -0.6855659936 | -4.9624205430 |
| C | 4.6326557221  | 0.1373537336  | -3.7947849014 |
| C | 5.6605691971  | -1.2750288137 | 1.1596355629  |
| C | 5.3858157311  | 0.2117877916  | 0.9078639512  |
| C | 4.4150017976  | 0.3461569283  | -0.2575986016 |
| C | 5.0454451211  | -0.3303465464 | -1.4683001019 |
| C | 5.4092303420  | -1.7839464699 | -1.1488439516 |
| H | -7.2169510925 | -2.5372402405 | -3.5659213703 |
| H | 5.2796012311  | -5.9011968290 | 2.5418447161  |
| H | 7.9395695852  | -1.7264102901 | -1.8033321411 |
| H | 4.3591214477  | 1.9539979593  | -1.4202125736 |
| H | 1.4510324365  | 3.0728133139  | -4.6066417515 |
| H | 3.9750852932  | -0.9770266605 | -7.1910478513 |
| H | -2.5594381708 | -0.7683865023 | -7.9175794293 |
| H | -3.2852756290 | 2.8232270720  | -3.7371362636 |
| H | -5.5225868106 | 0.4889363304  | 0.4793426029  |
| H | -5.7847199304 | -5.9767516532 | 1.4564234152  |
| H | -4.0105763201 | -1.7278676235 | 4.5330273954  |
| H | -0.4570462491 | -7.3371896976 | 4.8366041764  |
| H | 0.9316883481  | -2.2440721754 | 5.9812012026  |
| H | 4.6453080383  | -0.3255286429 | 3.5958135892  |
| H | 6.4459009330  | -3.4559408948 | -1.9927074657 |
| H | 5.5936020045  | -2.4472612622 | -3.1782288888 |
| H | 2.8108030348  | -2.5630159422 | -5.9905215033 |
| H | 1.3633929939  | -1.6008997473 | -6.3596775286 |
| H | -3.4248913545 | -1.9346710383 | -5.5156354356 |
| H | -1.9839875009 | -2.4469797282 | -6.4261892274 |
| H | -5.3025888269 | -3.8075770901 | -1.9466081624 |
| H | -5.1955417608 | -3.6531007680 | -3.7136608633 |
| H | -3.0035978187 | -5.8637500512 | 1.8171833855  |
| H | -3.8096866854 | -5.9378480420 | 0.2322518141  |
| H | 1.2464004633  | -6.2003617288 | 2.9153266669  |
| H | -0.3181599329 | -6.9645271910 | 2.5526725601  |
| H | 4.5646673282  | -4.3316121167 | 0.3287936193  |
| H | 3.6285597493  | -5.7157499172 | 0.9296691345  |
| H | 4.5125161785  | -3.4234767544 | 5.2722602807  |
| H | 2.8252703668  | -1.6645666087 | 3.4562769187  |
| H | 5.4416319809  | -3.1128475111 | 2.8451811351  |
| H | 2.6376392141  | -3.6599081288 | 1.7873725329  |
| H | 2.5873378308  | -4.9528300254 | 5.2015130710  |
| H | -0.5698700427 | -4.5257435945 | 2.6544420488  |
| H | 0.5198670285  | -4.8519114683 | 5.4850330640  |
| H | -0.7081762754 | -2.3984375923 | 4.1658577084  |
| H | -1.8254561754 | -4.1682861612 | 6.3687801969  |

|    |               |               |               |
|----|---------------|---------------|---------------|
| H  | -3.5324755764 | -4.8145700945 | 4.7476907958  |
| H  | -3.2691307120 | -3.6119247911 | 0.7310520408  |
| H  | -4.8287135090 | -4.1163196617 | 3.3023689313  |
| H  | -3.7817559473 | -1.4962183183 | 2.1454828904  |
| H  | -6.6353880985 | -2.4896460169 | 2.4807560408  |
| H  | -6.7318990378 | -2.5556542163 | 0.0454871018  |
| H  | -6.3623015202 | 1.0507727525  | -2.6654412192 |
| H  | -3.7381833343 | 0.2839346428  | -1.3312325740 |
| H  | -6.4621504986 | -1.0817461873 | -1.3473769813 |
| H  | -3.8236334229 | -1.9407761263 | -2.6140638289 |
| H  | -5.1706241462 | 0.6782773795  | -4.7728609556 |
| H  | -1.2906191594 | -0.9412782518 | -4.6230652989 |
| H  | -3.3967046052 | 0.9021545966  | -5.8219807693 |
| H  | -1.2549226646 | 1.6024425893  | -3.7790022354 |
| H  | -1.5185661384 | 2.4319383773  | -6.6973607803 |
| H  | 0.5843410324  | 1.1802075806  | -7.0019837525 |
| H  | 4.5976257661  | 1.8926136481  | -5.0184224929 |
| H  | 2.3410823402  | 1.2374692727  | -3.0888372550 |
| H  | 2.4450453277  | 1.1076119982  | -6.1276201442 |
| H  | 2.2415608079  | -1.1354973156 | -4.0755632064 |
| H  | 5.7225996989  | 0.0273652478  | -3.8216428719 |
| H  | 6.3997772093  | -1.3982970041 | 1.9583593258  |
| H  | 6.3361127902  | 0.6901188115  | 0.6413885467  |
| H  | 3.4905242529  | -0.1828107765 | 0.0080997716  |
| H  | 5.9683850504  | 0.2034298836  | -1.7350242832 |
| H  | 4.4797851475  | -2.3488635416 | -0.9898178902 |
| Cl | 0.5244813448  | 9.0517088543  | 0.3889889023  |
| Cl | 0.8204542787  | 10.6643587016 | 3.1324574437  |
| N  | 1.6200645456  | 2.8126330018  | -0.0100765003 |
| C  | 0.9916890696  | 2.2861208927  | 1.2769903046  |
| C  | 1.9516295983  | 2.5863757305  | 2.4201575429  |
| C  | 1.9833265623  | 4.0802067798  | 2.7247408896  |
| C  | 0.6031138583  | 4.6215735393  | 3.1253415376  |
| C  | -1.8296191893 | 4.5247039859  | 2.4926643161  |
| C  | -2.9305131824 | 3.9249461861  | 1.8967793231  |
| C  | -2.7725210403 | 2.7776510152  | 1.1202903391  |
| C  | -1.4955359462 | 2.2664174618  | 0.9354568418  |
| C  | -0.3729843992 | 2.8813223584  | 1.5064216404  |
| C  | -0.5379102504 | 4.0145179072  | 2.3205372051  |
| C  | 0.6091648558  | 6.1369774443  | 3.1279149029  |
| C  | 0.5424469446  | 6.8460406106  | 1.9288086788  |
| C  | 0.6098438704  | 8.2350066922  | 1.9084211829  |
| C  | 0.7404630649  | 8.9432379527  | 3.1092626068  |
| C  | 0.8001041906  | 8.2403182310  | 4.3097290929  |
| C  | 0.7365644299  | 6.8523887117  | 4.3182102524  |
| C  | 0.8081588751  | 2.6778000836  | -1.2443430241 |
| H  | 1.8224463855  | 3.8033418663  | 0.1361966440  |
| H  | 2.5572259009  | 2.3400975347  | -0.1563594428 |
| H  | 0.9084769317  | 1.2069461497  | 1.1109833776  |
| H  | 1.5937706344  | 2.0354932166  | 3.2973831414  |
| H  | 2.9483279813  | 2.1950302253  | 2.1905407844  |
| H  | 2.6960858669  | 4.2877933198  | 3.5287306543  |
| H  | 2.3630855495  | 4.6524183282  | 1.8645622282  |
| H  | 0.4273830052  | 4.3006782944  | 4.1627005823  |
| H  | -1.9670870233 | 5.4032998979  | 3.1169147641  |
| H  | -3.9205919515 | 4.3418990138  | 2.0554733990  |
| H  | -3.6337166787 | 2.2795238748  | 0.6784816079  |
| H  | -1.3630172351 | 1.3588587144  | 0.3500090475  |

|   |               |               |               |
|---|---------------|---------------|---------------|
| H | 0.4101134785  | 6.3224850120  | 0.9864859419  |
| H | 0.8934574847  | 8.7951855250  | 5.2369555656  |
| H | 0.7836459689  | 6.3246948881  | 5.2670129125  |
| H | 1.3736309460  | 3.0706215144  | -2.0942615342 |
| H | 0.5943252322  | 1.6209038317  | -1.4081469916 |
| H | -0.1272550541 | 3.2218173050  | -1.1213642071 |
| H | 5.3725693105  | 1.5929655893  | 2.2860950598  |
| H | 4.3811719631  | 3.3026022593  | -3.2230196629 |
| H | -0.7125753378 | 3.9569529977  | -5.0929120685 |
| H | -4.9956485212 | 2.7637117544  | -1.8598131648 |
| H | -6.1322683491 | -0.2094740127 | 2.7294595607  |
| H | -2.2660279426 | -1.8531386148 | 6.3605013654  |
| H | 3.3668724196  | -1.5434266511 | 6.1267361941  |



B-CD:cis-(1S,4S)-SRT\_2\_C1 E(Ha)= -5903.32626406

|   |               |               |               |
|---|---------------|---------------|---------------|
| O | -4.8527314123 | -4.9495873213 | -3.0223275103 |
| O | 6.7918365852  | 2.3543995536  | -2.4165300288 |
| O | 2.8309285350  | 6.7137381168  | -1.5681646556 |
| O | 4.0710513371  | 3.2001511458  | 2.9626792220  |
| O | 1.4504330372  | 4.2251064741  | 2.7536868439  |
| O | -3.3626596541 | 4.8957720402  | 1.6898921446  |
| O | -0.8106114332 | 5.8035907553  | 2.2186529800  |
| O | -2.8402360869 | 6.3247096738  | -3.2533141132 |
| O | -6.5020567762 | 1.2031993985  | -4.1538810075 |
| O | -5.8354028385 | 3.9198487290  | 0.8403318831  |
| O | -6.5766082730 | 1.2634746125  | 0.8559598797  |
| O | -3.5547360579 | -3.2700176366 | 1.6472368116  |
| O | -5.3717856073 | -1.1556042156 | 1.4945333231  |
| O | 0.8660240883  | -6.5316389783 | -3.7498632228 |
| O | -2.0142577243 | -5.6374660205 | 1.2974319057  |
| O | 0.7390333371  | -5.9310835474 | 1.3754311035  |
| O | 6.2053148062  | -3.6795936363 | -3.4851192391 |
| O | 3.5984403421  | -6.0691775293 | 1.1194043935  |
| O | 5.5216245209  | -4.0883256791 | 1.5051508087  |
| O | 4.3287898464  | 2.3262737421  | 0.3703675892  |
| O | 5.9747388397  | 1.1070913089  | 2.4598023649  |
| O | 6.7441292142  | -1.5050925683 | 1.9046817869  |
| O | 6.3508391277  | -0.1472942508 | -1.4268241500 |
| O | 5.2194180915  | -1.8686254877 | -0.3646390115 |
| O | 4.0021369715  | -4.7694594479 | -2.2348726149 |
| O | 2.1481627747  | -4.7607141339 | -0.8482994253 |
| O | -1.1816031607 | -5.4363094096 | -2.2248106106 |
| O | -2.2593637702 | -3.9266787094 | -0.8373127597 |
| O | -5.4267722849 | -2.4153729183 | -1.9077506617 |
| O | -4.8820659378 | -0.3197221491 | -1.1021334821 |
| O | -5.1278186255 | 2.9843710039  | -2.5794185112 |
| O | -3.6680549191 | 3.6336128478  | -0.9121876675 |
| O | -0.8061572763 | 5.8553268638  | -1.3997216591 |
| O | 0.4857310550  | 4.6534114025  | 0.1206985626  |
| O | 4.1119715007  | 4.5015042672  | -0.4338402329 |
| C | 2.5536570424  | 5.3888855667  | -1.9539476175 |
| C | -2.1921932006 | 5.0830029134  | -3.1373446339 |
| C | -5.1480426006 | 1.0083834276  | -3.8390343525 |
| C | -4.0728930270 | -3.7995650824 | -3.2533071707 |
| C | 0.7555880451  | -5.1477022240 | -3.5223636112 |
| C | 5.0356478314  | -2.9322617233 | -3.2591262498 |
| C | 5.5001205535  | 1.8014475980  | -2.4059412090 |
| C | 6.6942419324  | -0.5058160751 | 0.9082115594  |
| C | 5.6184480529  | 0.5152489728  | 1.2290861176  |
| C | 5.4876480960  | 1.5278111658  | 0.1042542409  |
| C | 5.3240774010  | 0.8311506773  | -1.2486102317 |
| C | 6.4135600485  | -1.1532343185 | -0.4459464939 |
| C | 4.3146250570  | -3.3927618978 | -2.0034879084 |
| C | 5.1848917301  | -3.2406052034 | -0.7547818499 |
| C | 4.6199125561  | -4.0044456752 | 0.4301745160  |
| C | 4.2553343447  | -5.4237761234 | 0.0454034555  |
| C | 3.3432467992  | -5.4162492032 | -1.1762982897 |
| C | 0.1237799845  | -4.8478778217 | -2.1750636106 |
| C | 0.9158060877  | -5.4449701778 | -1.0133505530 |
| C | 0.1449347351  | -5.2792524673 | 0.2831109731  |
| C | -1.2429174229 | -5.8687474305 | 0.1310670806  |

|   |               |               |               |
|---|---------------|---------------|---------------|
| C | -1.9683037034 | -5.2834913914 | -1.0764470694 |
| C | -5.2183869987 | -2.1089343187 | 0.4536468063  |
| C | -3.7919662791 | -2.6278182521 | 0.4142583240  |
| C | -3.6271282124 | -3.5582213789 | -0.7729239337 |
| C | -4.0746415093 | -2.8631963179 | -2.0590269105 |
| C | -5.6271096645 | -1.4848965289 | -0.8787904593 |
| C | -4.8064092314 | 1.5953444316  | -2.4785403763 |
| C | -5.5802914851 | 0.8928957210  | -1.3563859592 |
| C | -5.6224072071 | 1.7132300579  | -0.0752637240 |
| C | -5.9440483037 | 3.1672567212  | -0.3536752938 |
| C | -4.9851671018 | 3.7215570918  | -1.3997349012 |
| C | -1.3785826548 | 5.8993748465  | 0.9196412234  |
| C | -2.3785506328 | 4.7820242475  | 0.6954572493  |
| C | -2.9068253963 | 4.8179617041  | -0.7255183397 |
| C | -1.7368176823 | 4.8154808253  | -1.7134605380 |
| C | -0.2618695756 | 5.8305083397  | -0.1142991578 |
| C | 4.5054678403  | 3.6840468569  | 0.6355100774  |
| C | 3.6840636340  | 4.0406804008  | 1.8804197703  |
| C | 2.1987526887  | 3.9014553815  | 1.5862072418  |
| C | 1.8645207571  | 4.8003828769  | 0.4056900686  |
| C | 2.7328297959  | 4.4208569887  | -0.7977634971 |
| H | -5.7565222712 | -4.6466377717 | -2.8752552112 |
| H | 7.4018699262  | 1.6101779783  | -2.4903857338 |
| H | 3.7689643555  | 6.7484361330  | -1.3468430078 |
| H | 0.6487220810  | 4.7346011082  | 2.4956304553  |
| H | -4.1969633828 | 4.4864096596  | 1.3778107761  |
| H | -2.1887050509 | 7.0005794600  | -3.0324609131 |
| H | -6.6473212159 | 2.1569456265  | -4.1509084074 |
| H | -6.2538586991 | 0.4219330204  | 1.2262138971  |
| H | -2.9060874537 | -3.9895346594 | 1.5094668050  |
| H | -0.0303020844 | -6.8865568069 | -3.7128300629 |
| H | 1.7073884242  | -5.8210195985 | 1.3260413437  |
| H | 5.9256303984  | -4.5996693473 | -3.5654066399 |
| H | 5.8266191659  | -3.1895546210 | 1.7231582958  |
| H | 5.3145491738  | 1.7887101194  | 2.6649591335  |
| H | 3.1914292971  | 5.0619975060  | -2.7870039502 |
| H | 1.5126654717  | 5.3635445666  | -2.2862356612 |
| H | -1.3245676788 | 5.0080907475  | -3.8092315705 |
| H | -2.9148912713 | 4.3146332463  | -3.4287695021 |
| H | -4.9727426323 | -0.0710686905 | -3.8106423765 |
| H | -4.4820796222 | 1.4483450439  | -4.5963044322 |
| H | -3.0503422853 | -4.1402182674 | -3.4380677880 |
| H | -4.4178956347 | -3.2436896929 | -4.1370674284 |
| H | 1.7692500733  | -4.7379703220 | -3.5404263948 |
| H | 0.1665648780  | -4.6497197664 | -4.3070388336 |
| H | 5.3381180413  | -1.8876282777 | -3.1390255403 |
| H | 4.3403220554  | -2.9941450673 | -4.1095490659 |
| H | 4.7962247855  | 2.6301445326  | -2.2869576988 |
| H | 5.2680587376  | 1.2811928099  | -3.3468770248 |
| H | 7.6623409612  | 0.0111390570  | 0.8346478731  |
| H | 4.6610759287  | -0.0205548970 | 1.3146809317  |
| H | 6.3814335224  | 2.1636363115  | 0.0627739085  |
| H | 4.3334310970  | 0.3583712954  | -1.2903646689 |
| H | 7.2400877656  | -1.8071414491 | -0.7448492757 |
| H | 3.3904734794  | -2.8182443189 | -1.8645031007 |
| H | 6.1967439282  | -3.6019070530 | -0.9794218939 |
| H | 3.6863705535  | -3.5078827995 | 0.7374561583  |
| H | 5.1719525480  | -5.9703682104 | -0.2201259727 |

|    |               |               |               |
|----|---------------|---------------|---------------|
| H  | 3.1427178712  | -6.4338226412 | -1.5283388408 |
| H  | 0.0410750724  | -3.7606371538 | -2.0346424144 |
| H  | 1.0895653449  | -6.5099311967 | -1.2140639991 |
| H  | 0.0436441123  | -4.1967421490 | 0.4737273306  |
| H  | -1.1376520073 | -6.9505018024 | -0.0365559473 |
| H  | -2.8929420759 | -5.8338609829 | -1.2817863053 |
| H  | -5.8842926831 | -2.9656656542 | 0.6284555046  |
| H  | -3.1092067985 | -1.7741381472 | 0.2782966542  |
| H  | -4.2558756835 | -4.4456059325 | -0.6240427497 |
| H  | -3.4136381588 | -2.0080013866 | -2.2583287451 |
| H  | -6.6996448349 | -1.2603596292 | -0.8825874292 |
| H  | -3.7331949702 | 1.4754654404  | -2.2777701434 |
| H  | -6.6035936325 | 0.6951912952  | -1.7031040821 |
| H  | -4.6149984236 | 1.6744150806  | 0.3617807797  |
| H  | -6.9627192456 | 3.2439085588  | -0.7587251304 |
| H  | -5.2295033311 | 4.7582445074  | -1.6560408412 |
| H  | -1.8878216375 | 6.8666541543  | 0.8098842548  |
| H  | -1.8361259295 | 3.8278034982  | 0.7921326822  |
| H  | -3.5209656359 | 5.7113963348  | -0.8975072596 |
| H  | -1.2347508405 | 3.8395307353  | -1.6558197952 |
| H  | 0.3926512980  | 6.7067408597  | -0.0569739337 |
| H  | 5.5632455447  | 3.9134548928  | 0.8062526620  |
| H  | 3.8908555254  | 5.0882881576  | 2.1308179525  |
| H  | 1.9937236051  | 2.8587536502  | 1.2964920995  |
| H  | 2.0891093685  | 5.8438621432  | 0.6665980259  |
| H  | 2.4811291966  | 3.3999893980  | -1.1194869600 |
| Cl | 2.2401761434  | -1.2538118367 | 0.3587948484  |
| Cl | 1.1387649686  | -0.0078155310 | -2.3632330943 |
| N  | 0.9371898151  | 1.7851711723  | 3.9797269952  |
| C  | -0.2329756320 | 1.6718505372  | 4.9427982686  |
| C  | -1.3667052303 | 2.5824028790  | 4.4999782354  |
| C  | -1.8387428140 | 2.2239737689  | 3.0950031528  |
| C  | -1.9646113152 | 0.6951759151  | 2.7967276360  |
| C  | -2.0025538413 | -1.5274506459 | 3.9851831679  |
| C  | -1.6480263747 | -2.3698084224 | 5.0341078190  |
| C  | -0.8391645113 | -1.9076613355 | 6.0693950886  |
| C  | -0.3737003567 | -0.5991138827 | 6.0378847841  |
| C  | -0.7141090240 | 0.2479915282  | 4.9800209589  |
| C  | -1.5504721557 | -0.2047899489 | 3.9470159614  |
| C  | -1.2080541069 | 0.4055130545  | 1.5056024259  |
| C  | -0.0091686928 | -0.3029457032 | 1.4824350082  |
| C  | 0.7323868203  | -0.4283815172 | 0.3042600078  |
| C  | 0.2573684707  | 0.1261532281  | -0.8832874474 |
| C  | -0.9600435664 | 0.8047668051  | -0.8732050970 |
| C  | -1.6755424383 | 0.9512414195  | 0.3034145321  |
| C  | 2.1795003269  | 1.1517174872  | 4.4823946868  |
| H  | 0.6679753947  | 1.3124240405  | 3.1070596572  |
| H  | 1.1207093178  | 2.7817020969  | 3.6898544024  |
| H  | 0.1643451791  | 1.9768520279  | 5.9158444526  |
| H  | -2.1674880956 | 2.4622938892  | 5.2363085046  |
| H  | -1.0624055569 | 3.6352045601  | 4.5284368647  |
| H  | -2.7825596554 | 2.7365243402  | 2.8927554571  |
| H  | -1.1297045902 | 2.6590736952  | 2.3825977850  |
| H  | -3.0180809058 | 0.4690789335  | 2.5900988407  |
| H  | -2.6250879769 | -1.9157101317 | 3.1791454521  |
| H  | -2.0145883214 | -3.3918279537 | 5.0452812801  |
| H  | -0.5764954273 | -2.5598154532 | 6.8962561205  |
| H  | 0.2478924499  | -0.2220650807 | 6.8468724962  |

|   |               |               |               |
|---|---------------|---------------|---------------|
| H | 0.3528331014  | -0.8136267254 | 2.3710084419  |
| H | -1.3349376579 | 1.2265815731  | -1.7997223473 |
| H | -2.6041031635 | 1.5106288855  | 0.2782242317  |
| H | 2.9611155924  | 1.2553888112  | 3.7313975818  |
| H | 2.4857249835  | 1.6623417781  | 5.3966997741  |
| H | 1.9767313800  | 0.1029072020  | 4.6998425515  |
| H | 4.2685526265  | 3.7551027896  | 3.7226279802  |
| H | -1.5623895983 | 5.7797328784  | 2.8264509049  |
| H | -6.3111176815 | 3.3998737439  | 1.5050100514  |
| H | -5.1958027309 | -1.6235703463 | 2.3196208682  |
| H | -1.4481193200 | -5.9103532053 | 2.0328325376  |
| H | 4.1408165426  | -5.8878644223 | 1.8992141119  |
| H | 6.7670716006  | -1.0366385454 | 2.7492703220  |

B-CD:cis-(1S,4S)-SRT\_3\_CI E(Ha)= -5903.31722101

|   |               |               |               |
|---|---------------|---------------|---------------|
| O | -1.1226771928 | -6.1656883366 | -4.2447114886 |
| O | 3.9000503359  | 6.2080151810  | -3.2939031851 |
| O | -1.9416755567 | 7.7611678399  | -1.8542204325 |
| O | 1.3961687027  | 5.4782649106  | 2.3552676499  |
| O | -1.2643246713 | 4.6378544685  | 2.1703343698  |
| O | -5.3328718736 | 2.7464007253  | 1.7675784401  |
| O | -3.9696900505 | 5.1393586894  | 1.7419149020  |
| O | -6.3249537940 | 3.3302246198  | -3.2075650677 |
| O | -6.4412075577 | -2.9045973078 | -3.2426703609 |
| O | -5.6291746298 | -0.0340561339 | 1.7886882954  |
| O | -4.3647547345 | -2.4250475328 | 1.4870843841  |
| O | -1.2833014454 | -5.9524367458 | 0.7804229652  |
| O | -3.9100982560 | -5.0962425616 | 0.6715915306  |
| O | 5.1277836568  | -5.1334008137 | -2.9031263283 |
| O | 1.1498944134  | -4.8453249993 | 1.3851700714  |
| O | 3.2532733088  | -3.0620515910 | 1.4689026881  |
| O | 7.2051345854  | 0.9272075354  | -3.6012191187 |
| O | 5.8984172119  | -2.1638854156 | 1.1458609535  |
| O | 6.1936827479  | 0.5721541350  | 1.3618964841  |
| O | 1.9935244560  | 5.0458901917  | -0.3348932204 |
| O | 4.1196709273  | 5.1809575563  | 1.7270484953  |
| O | 6.1972583806  | 3.4261681770  | 1.2699891618  |
| O | 5.0091672987  | 4.0050246186  | -2.1004646580 |
| O | 5.0435155834  | 2.0606704723  | -0.8533095957 |
| O | 5.8935358240  | -1.1786383777 | -2.3401633458 |
| O | 4.2306777492  | -2.1748865112 | -1.1036013269 |
| O | 2.4977340580  | -5.2932394687 | -1.9452343179 |
| O | 0.4245205796  | -4.5042145423 | -1.2699555887 |
| O | -2.8824615677 | -4.6664391754 | -2.7680463920 |
| O | -3.5195797159 | -3.0834460604 | -1.2248630265 |
| O | -6.0716487200 | -0.5185549293 | -1.7827922322 |
| O | -4.8560619528 | 1.0916958745  | -0.6400873641 |
| O | -4.2484454633 | 4.4909162430  | -1.8071196175 |
| O | -2.3571456369 | 4.5486288254  | -0.4958399486 |
| O | 0.5389600733  | 6.7547719334  | -0.9222357138 |
| C | -1.2990293169 | 6.6268301417  | -2.3878708112 |
| C | -5.0421156140 | 2.7580876338  | -3.1771278484 |
| C | -5.3198330242 | -2.0678237479 | -3.3928072214 |
| C | -0.8884258673 | -4.8053951548 | -3.9869402017 |
| C | 4.1123961139  | -4.2403205630 | -3.2945646085 |
| C | 5.8034609044  | 0.8205457980  | -3.5613087055 |
| C | 3.1656520676  | 5.0229604345  | -3.1253035607 |
| C | 5.5610996055  | 4.1211754096  | 0.2166911409  |
| C | 4.1095678886  | 4.3883125063  | 0.5633697425  |
| C | 3.3936883657  | 5.0435707778  | -0.6064364600 |
| C | 3.6169037995  | 4.2527007961  | -1.8960384057 |
| C | 5.6510347175  | 3.3031108567  | -1.0666365577 |
| C | 5.3319730856  | 0.1381120542  | -2.2878360742 |
| C | 5.8044416782  | 0.8724412922  | -1.0320723638 |
| C | 5.5895877946  | 0.0329732113  | 0.2138273418  |
| C | 6.1815775165  | -1.3478662889 | 0.0205264264  |
| C | 5.6196115107  | -1.9967303008 | -1.2390021345 |
| C | 3.1021243928  | -4.0195283918 | -2.1822901729 |
| C | 3.7609942570  | -3.4967677247 | -0.9020573733 |
| C | 2.7400010860  | -3.4599173984 | 0.2165713148  |
| C | 2.1357235966  | -4.8453465685 | 0.3714329982  |

|   |               |               |               |
|---|---------------|---------------|---------------|
| C | 1.5159895988  | -5.3197090174 | -0.9428802208 |
| C | -3.1367059235 | -5.3239136487 | -0.4939331741 |
| C | -1.6759424332 | -5.0339016667 | -0.2106976620 |
| C | -0.8408488592 | -5.1241792515 | -1.4827000475 |
| C | -1.4872170258 | -4.3802575701 | -2.6558025822 |
| C | -3.6402080070 | -4.4310483548 | -1.6160683880 |
| C | -4.9608774712 | -1.3667584690 | -2.0946633271 |
| C | -4.7066991946 | -2.3607966352 | -0.9589086877 |
| C | -4.5263386757 | -1.6134300271 | 0.3475730338  |
| C | -5.7547850179 | -0.7494859193 | 0.5702784445  |
| C | -5.9494098812 | 0.2138820089  | -0.5946516375 |
| C | -4.5210773500 | 4.5865175605  | 0.5526343818  |
| C | -4.5637090913 | 3.0747271721  | 0.6336525822  |
| C | -5.0856899253 | 2.4918551337  | -0.6691838460 |
| C | -4.3281474097 | 3.0651231928  | -1.8714730465 |
| C | -3.6821228412 | 5.0158192816  | -0.6460992511 |
| C | 1.3899705119  | 6.2356230892  | 0.0706806028  |
| C | 0.5579730220  | 5.9583355503  | 1.3231425879  |
| C | -0.5282170361 | 4.9460859151  | 0.9947656887  |
| C | -1.3843541748 | 5.5122376133  | -0.1220877847 |
| C | -0.5103772498 | 5.8782032008  | -1.3269507635 |
| H | -2.0802747005 | -6.2828239695 | -4.2261634954 |
| H | 4.8253469226  | 5.9440644726  | -3.3671913941 |
| H | -1.2465636751 | 8.3576412648  | -1.5522656472 |
| H | -2.1983346069 | 4.8987344559  | 2.0317209738  |
| H | -5.4590067179 | 1.7779283766  | 1.7941410689  |
| H | -6.2016810159 | 4.2842228704  | -3.1375532210 |
| H | -7.1806913722 | -2.3365778479 | -2.9962641341 |
| H | -4.1694526846 | -3.3446646646 | 1.2127090801  |
| H | -0.4481454186 | -5.6347365099 | 1.1671668002  |
| H | 4.6915300363  | -5.9675477666 | -2.6918511242 |
| H | 4.1430892951  | -2.6760405108 | 1.3393386704  |
| H | 7.5470772809  | 0.0263869030  | -3.5533677659 |
| H | 6.0609016293  | 1.5386739341  | 1.3690127914  |
| H | 3.2117739140  | 5.2264236214  | 2.0708468325  |
| H | -0.6190758324 | 6.8895875567  | -3.2098865814 |
| H | -2.0795670107 | 5.9735003672  | -2.7883178658 |
| H | -4.4168938838 | 3.1014412484  | -4.0141235932 |
| H | -5.1713874658 | 1.6750817880  | -3.2631093172 |
| H | -4.4820873105 | -2.7022889668 | -3.6973187550 |
| H | -5.4774786469 | -1.3098152763 | -4.1736351015 |
| H | 0.1954117049  | -4.6639862146 | -3.9475603152 |
| H | -1.2940430604 | -4.1612518035 | -4.7816027651 |
| H | 4.5928307608  | -3.2876902454 | -3.5372830434 |
| H | 3.5804682362  | -4.5942022908 | -4.1892924775 |
| H | 5.4016058338  | 1.8372212863  | -3.5974315354 |
| H | 5.4096516612  | 0.2636880967  | -4.4242696233 |
| H | 2.1171727961  | 5.3085464777  | -3.0012114149 |
| H | 3.2423350819  | 4.3648974260  | -4.0038018212 |
| H | 6.0678152961  | 5.0812472698  | 0.0388044460  |
| H | 3.6220709608  | 3.4179823616  | 0.7480810794  |
| H | 3.7587404518  | 6.0682818474  | -0.7527876836 |
| H | 3.0746309877  | 3.2999658532  | -1.8246111781 |
| H | 6.6904963242  | 3.1796581279  | -1.3892843120 |
| H | 4.2351657254  | 0.0791571260  | -2.2739911779 |
| H | 6.8709237080  | 1.1100597535  | -1.1364494159 |
| H | 4.5012457148  | -0.0796729272 | 0.3541764997  |
| H | 7.2698298210  | -1.2533116279 | -0.1027608897 |

|    |               |               |               |
|----|---------------|---------------|---------------|
| H  | 6.1084366462  | -2.9557143426 | -1.4459616323 |
| H  | 2.3435321667  | -3.2950062688 | -2.5112139135 |
| H  | 4.5916098120  | -4.1634159145 | -0.6351188348 |
| H  | 1.9456170026  | -2.7650166165 | -0.0922259130 |
| H  | 2.9387358966  | -5.5515109274 | 0.6302440723  |
| H  | 1.2003122665  | -6.3656545298 | -0.8633602529 |
| H  | -3.2420005011 | -6.3699316647 | -0.8151945798 |
| H  | -1.6110092467 | -4.0001741207 | 0.1611466839  |
| H  | -0.7137074649 | -6.1776653848 | -1.7654874847 |
| H  | -1.3414545415 | -3.3012195042 | -2.5089845724 |
| H  | -4.6777503495 | -4.6609463290 | -1.8830374291 |
| H  | -4.0533638441 | -0.7632039034 | -2.2392106160 |
| H  | -5.5651444434 | -3.0418276181 | -0.8879631683 |
| H  | -3.6553771091 | -0.9499685485 | 0.2414048534  |
| H  | -6.6415964312 | -1.3977019800 | 0.6163572475  |
| H  | -6.8865137914 | 0.7728467238  | -0.4916011071 |
| H  | -5.5386156997 | 4.9752483200  | 0.4100308398  |
| H  | -3.5303735889 | 2.7150748466  | 0.7496453190  |
| H  | -6.1553380029 | 2.7123951147  | -0.7859897136 |
| H  | -3.3157577185 | 2.6381004027  | -1.8844211066 |
| H  | -3.6886300494 | 6.1046678983  | -0.7685256070 |
| H  | 2.1368537474  | 7.0132849228  | 0.2622075468  |
| H  | 0.0921988269  | 6.9074661523  | 1.6267973841  |
| H  | -0.0342695818 | 4.0302803839  | 0.6442318126  |
| H  | -1.8784468414 | 6.4264857339  | 0.2343104554  |
| H  | -0.0943784264 | 4.9552231165  | -1.7543542725 |
| Cl | -3.1190716392 | -4.7193008117 | 4.1052408894  |
| Cl | -0.9556758345 | -6.6479000709 | 5.4373399574  |
| N  | -1.6894384784 | 1.4955779289  | 4.1654664267  |
| C  | -0.4067260054 | 1.5817639162  | 3.3223206301  |
| C  | 0.7614373569  | 1.1932517609  | 4.2157508262  |
| C  | 0.6961578832  | -0.2830904790 | 4.5911642010  |
| C  | 0.6920294472  | -1.2107306940 | 3.3616831145  |
| C  | -0.2141494324 | -1.4355535702 | 1.0310977436  |
| C  | -0.7669037505 | -0.9238693461 | -0.1351057437 |
| C  | -1.1866653238 | 0.4040737692  | -0.1882122335 |
| C  | -1.0647465982 | 1.2010237239  | 0.9402662801  |
| C  | -0.5267278760 | 0.6825217131  | 2.1253279605  |
| C  | -0.0698117964 | -0.6445947431 | 2.1753968221  |
| C  | 0.2560605088  | -2.5978899950 | 3.7957140296  |
| C  | -1.0710135827 | -3.0177820238 | 3.7145106922  |
| C  | -1.4574501776 | -4.2588342597 | 4.2175953081  |
| C  | -0.5149304158 | -5.1066883426 | 4.8084809567  |
| C  | 0.8146479893  | -4.6939104717 | 4.8799345482  |
| C  | 1.1941716544  | -3.4536716256 | 4.3828625493  |
| C  | -2.9584111300 | 1.8855190589  | 3.4873960290  |
| H  | -1.7723899354 | 0.5363090092  | 4.5118118368  |
| H  | -1.5541287611 | 2.0865991525  | 4.9892875857  |
| H  | -0.3720915602 | 2.6333021869  | 3.0187180996  |
| H  | 1.6762237457  | 1.3982269164  | 3.6491719442  |
| H  | 0.8051617288  | 1.8265016989  | 5.1120259104  |
| H  | 1.5393418998  | -0.5446792757 | 5.2367722843  |
| H  | -0.1935142251 | -0.4929804848 | 5.2050436568  |
| H  | 1.7317150401  | -1.3055051878 | 3.0144445474  |
| H  | 0.1250067847  | -2.4668383228 | 1.0571072011  |
| H  | -0.8547243101 | -1.5646770936 | -1.0061883368 |
| H  | -1.6048460009 | 0.8162573372  | -1.1009189494 |
| H  | -1.3689929384 | 2.2446410580  | 0.9047973934  |

|   |               |               |              |
|---|---------------|---------------|--------------|
| H | -1.8247719748 | -2.4073468172 | 3.2242307850 |
| H | 1.5454524124  | -5.3572627765 | 5.3302673162 |
| H | 2.2376150171  | -3.1545722246 | 4.4374063784 |
| H | -3.7568552429 | 1.9087042462  | 4.2290885756 |
| H | -2.8194895103 | 2.8670119068  | 3.0382949796 |
| H | -3.1884458993 | 1.1550846383  | 2.7130061971 |
| H | 0.8268261045  | 5.3289954747  | 3.1186567605 |
| H | -4.5464758426 | 4.8365905906  | 2.4559503066 |
| H | -5.3813191602 | -0.7061099635 | 2.4394344546 |
| H | -3.4326131880 | -5.5486009058 | 1.3841525850 |
| H | 1.5536674728  | -4.4751264191 | 2.1824215257 |
| H | 6.1769678054  | -1.6415678736 | 1.9114699268 |
| H | 5.9481111241  | 3.9045692898  | 2.0733730188 |



B-CD:cis-(1S,4S)-SRT\_4\_CI E(Ha)= -5903.2939552168

|   |             |             |             |
|---|-------------|-------------|-------------|
| O | -5.09399117 | -4.57021890 | 0.04078234  |
| O | 7.10707918  | 2.37366344  | -1.65171305 |
| O | 2.10349649  | 5.96941304  | -3.79919682 |
| O | 4.63395939  | 5.42436672  | 1.39661562  |
| O | 2.23831548  | 6.75469480  | 1.25860187  |
| O | -2.90364350 | 6.43337605  | 1.91541272  |
| O | -0.46021257 | 7.48543153  | 1.24036784  |
| O | -3.99372910 | 5.84325902  | -3.06276251 |
| O | -7.25594031 | 0.96395651  | -1.25535478 |
| O | -5.10695679 | 4.82502120  | 2.57331647  |
| O | -5.64848275 | 2.27433902  | 3.45043892  |
| O | -4.43097609 | -2.50491181 | 4.68703201  |
| O | -6.11815707 | -0.44773074 | 4.00623088  |
| O | 0.51591985  | -6.84274683 | 0.79904283  |
| O | -2.17222980 | -4.08264838 | 5.17573366  |
| O | 0.57239010  | -4.09114853 | 5.10366385  |
| O | 5.63311627  | -3.92522786 | -0.63207766 |
| O | 3.36787892  | -4.06789105 | 4.68016471  |
| O | 5.13209512  | -2.06156157 | 4.06361978  |
| O | 3.94216482  | 3.16526912  | -0.15258734 |
| O | 4.49112144  | 3.00330216  | 2.73950491  |
| O | 5.35551389  | 0.60407063  | 3.61850773  |
| O | 6.21393117  | 0.30701610  | 0.10891021  |
| O | 4.64078097  | -0.91128595 | 1.29009088  |
| O | 3.54947953  | -4.37748874 | 1.08311281  |
| O | 1.73686013  | -3.86034212 | 2.42369090  |
| O | -1.57620960 | -5.30151465 | 1.81568313  |
| O | -2.64078167 | -3.36980598 | 2.52191743  |
| O | -5.52827351 | -1.96379430 | 0.76954394  |
| O | -5.04338458 | 0.16598779  | 1.52643752  |
| O | -5.62861640 | 3.10776823  | -0.57625013 |
| O | -3.74784728 | 4.17606855  | 0.24086139  |
| O | -1.50024220 | 6.07371440  | -1.93259352 |
| O | 0.30179694  | 5.53069635  | -0.59311041 |
| O | 3.54674581  | 4.53398141  | -1.94483091 |
| C | 1.60712186  | 4.78552622  | -3.23542740 |
| C | -3.24016338 | 4.71316661  | -2.71217879 |
| C | -5.85484936 | 0.89066671  | -1.30587866 |
| C | -4.10704926 | -3.58742655 | -0.13294491 |
| C | 0.25966044  | -5.52834428 | 0.37565794  |
| C | 4.45821414  | -3.17122108 | -0.69338793 |
| C | 5.93101863  | 1.62906886  | -1.81899369 |
| C | 5.68600587  | 1.01975075  | 2.31491257  |
| C | 4.62407689  | 1.97584536  | 1.79838760  |
| C | 5.01926484  | 2.43308539  | 0.40916630  |
| C | 5.31340332  | 1.22617123  | -0.48849843 |
| C | 5.83801316  | -0.17345529 | 1.37714323  |
| C | 3.80008661  | -3.04552580 | 0.67496652  |
| C | 4.68584101  | -2.28936329 | 1.66804211  |
| C | 4.19569632  | -2.46291603 | 3.09989739  |
| C | 3.92069175  | -3.92822810 | 3.39170714  |
| C | 2.96893520  | -4.51746680 | 2.36164905  |
| C | -0.33436143 | -4.68441080 | 1.49226512  |
| C | 0.57529347  | -4.63363799 | 2.72017025  |
| C | -0.13308418 | -3.98871707 | 3.89655153  |
| C | -1.45941271 | -4.69283237 | 4.12295859  |

|   |             |             |             |
|---|-------------|-------------|-------------|
| C | -2.30293232 | -4.68423388 | 2.85248984  |
| C | -5.78553264 | -1.47478794 | 3.09566317  |
| C | -4.39223980 | -2.00214934 | 3.37888545  |
| C | -4.01373807 | -3.04311515 | 2.33903474  |
| C | -4.21307552 | -2.49866559 | 0.92356741  |
| C | -5.88331768 | -0.94622754 | 1.66996242  |
| C | -5.20594657 | 1.78054082  | -0.25873974 |
| C | -5.62567831 | 1.40902091  | 1.16434710  |
| C | -5.14166857 | 2.45145059  | 2.15606703  |
| C | -5.60140266 | 3.82589884  | 1.70571187  |
| C | -5.14603437 | 4.11246239  | 0.27971304  |
| C | -1.36397435 | 7.01342958  | 0.26217368  |
| C | -2.21490829 | 5.89083102  | 0.82298456  |
| C | -3.12864298 | 5.34957575  | -0.26297976 |
| C | -2.33600363 | 4.99095466  | -1.52140412 |
| C | -0.59682981 | 6.54096419  | -0.96637164 |
| C | 4.26080117  | 4.40647465  | -0.75233491 |
| C | 3.92350038  | 5.56392331  | 0.17933546  |
| C | 2.43347314  | 5.63320634  | 0.44457869  |
| C | 1.68011950  | 5.69981205  | -0.87314163 |
| C | 2.12342861  | 4.58316800  | -1.81968280 |
| H | -5.94447978 | -4.10623576 | 0.01984903  |
| H | 7.75324077  | 1.79849377  | -1.21617883 |
| H | 3.06973990  | 5.90773888  | -3.76748386 |
| H | 1.27534726  | 6.91919195  | 1.35620871  |
| H | -3.57730538 | 5.79000461  | 2.22233343  |
| H | -3.35677337 | 6.54959504  | -3.24733430 |
| H | -7.48621165 | 1.89748483  | -1.37516147 |
| H | -5.65357533 | 1.31867022  | 3.66947421  |
| H | -3.57210822 | -2.92734777 | 4.89396878  |
| H | -0.33678141 | -7.21690299 | 1.06650963  |
| H | 1.52329130  | -3.92230708 | 4.94423091  |
| H | 5.38859907  | -4.78796309 | -0.26335374 |
| H | 5.17959901  | -1.08386675 | 4.06617296  |
| H | 4.48541601  | 3.87271122  | 2.28142730  |
| H | 1.87238680  | 3.90237092  | -3.84055851 |
| H | 0.51698908  | 4.87292599  | -3.21326124 |
| H | -2.62247067 | 4.35714703  | -3.55287915 |
| H | -3.95402813 | 3.92687969  | -2.44659743 |
| H | -5.58205139 | -0.15179119 | -1.11747216 |
| H | -5.47009265 | 1.17709249  | -2.29897500 |
| H | -3.13941752 | -4.09002792 | -0.04328690 |
| H | -4.16761913 | -3.12135941 | -1.12965479 |
| H | 1.22237752  | -5.10500029 | 0.07199619  |
| H | -0.41995304 | -5.50420710 | -0.48958384 |
| H | 4.74536519  | -2.17642031 | -1.05427596 |
| H | 3.73101374  | -3.60923833 | -1.39863150 |
| H | 5.22616435  | 2.26625176  | -2.36300586 |
| H | 6.10526577  | 0.71940227  | -2.41518573 |
| H | 6.65502531  | 1.54197452  | 2.32262648  |
| H | 3.67423769  | 1.41867776  | 1.72399519  |
| H | 5.92076768  | 3.05533957  | 0.47206706  |
| H | 4.34783600  | 0.72895082  | -0.68758122 |
| H | 6.65606578  | -0.82386182 | 1.70093006  |
| H | 2.84039232  | -2.50522341 | 0.59343927  |
| H | 5.71036967  | -2.67300838 | 1.57990590  |
| H | 3.24896375  | -1.90911952 | 3.20492227  |
| H | 4.86953528  | -4.48137650 | 3.32530634  |

|    |             |             |             |
|----|-------------|-------------|-------------|
| H  | 2.84266180  | -5.59485273 | 2.50406661  |
| H  | -0.50820728 | -3.65677551 | 1.13554374  |
| H  | 0.86315628  | -5.65816417 | 2.98576751  |
| H  | -0.33798805 | -2.93456531 | 3.64227218  |
| H  | -1.25052065 | -5.74381140 | 4.37307442  |
| H  | -3.20261999 | -5.29486548 | 2.97939621  |
| H  | -6.49876499 | -2.30673568 | 3.19444076  |
| H  | -3.68073239 | -1.16350504 | 3.29298258  |
| H  | -4.63888907 | -3.93666391 | 2.46341593  |
| H  | -3.46589957 | -1.71341251 | 0.73613135  |
| H  | -6.91542000 | -0.68158852 | 1.41783428  |
| H  | -4.11040650 | 1.70759044  | -0.33292620 |
| H  | -6.72068836 | 1.34604974  | 1.20572924  |
| H  | -4.03822393 | 2.43519495  | 2.15536443  |
| H  | -6.70145513 | 3.83922336  | 1.71194416  |
| H  | -5.58291448 | 5.04636469  | -0.08905388 |
| H  | -2.02878812 | 7.83035211  | -0.05514638 |
| H  | -1.54528784 | 5.07285333  | 1.13888796  |
| H  | -3.88223807 | 6.10486849  | -0.52154949 |
| H  | -1.71878452 | 4.10629613  | -1.30163267 |
| H  | -0.06264510 | 7.37192853  | -1.43875267 |
| H  | 5.32038843  | 4.42371449  | -1.03090546 |
| H  | 4.23440888  | 6.49239337  | -0.32131922 |
| H  | 2.13011794  | 4.70544602  | 0.96003297  |
| H  | 1.86516218  | 6.66849956  | -1.35539727 |
| H  | 1.74970882  | 3.62843818  | -1.41711107 |
| Cl | -1.34454379 | -5.98516617 | -3.33871606 |
| Cl | -0.33321685 | -7.26917074 | -6.08070711 |
| N  | 1.81063627  | -0.47245670 | -1.04846068 |
| C  | 1.73927714  | 0.29985868  | -2.37608668 |
| C  | 2.81403261  | -0.25432424 | -3.30031838 |
| C  | 2.43915023  | -1.63371737 | -3.82683351 |
| C  | 1.14472725  | -1.58469266 | -4.64660991 |
| C  | -1.23328916 | -0.77317447 | -4.49933722 |
| C  | -2.22809022 | 0.07117633  | -4.02455197 |
| C  | -1.93356673 | 1.00766653  | -3.03576778 |
| C  | -0.64544954 | 1.07116780  | -2.52267739 |
| C  | 0.35569874  | 0.19539915  | -2.96791692 |
| C  | 0.06974829  | -0.73109037 | -3.98961791 |
| C  | 0.70871822  | -2.98966381 | -5.01437752 |
| C  | -0.04750241 | -3.76818705 | -4.13880499 |
| C  | -0.38245956 | -5.08310836 | -4.45135823 |
| C  | 0.05253909  | -5.64664664 | -5.65698183 |
| C  | 0.80743037  | -4.87158339 | -6.53508145 |
| C  | 1.12843307  | -3.55809139 | -6.21846664 |
| C  | 1.02459987  | 0.07875440  | 0.08881323  |
| H  | 1.51535681  | -1.43684238 | -1.22842162 |
| H  | 2.79438561  | -0.52679411 | -0.75052257 |
| H  | 1.96989821  | 1.33088641  | -2.08566393 |
| H  | 2.91051714  | 0.44863796  | -4.13695062 |
| H  | 3.79002595  | -0.26877869 | -2.79855110 |
| H  | 3.24784222  | -2.03259689 | -4.44742436 |
| H  | 2.32502223  | -2.35872412 | -3.00619874 |
| H  | 1.39077729  | -1.07145683 | -5.58950421 |
| H  | -1.46335650 | -1.48072271 | -5.29095421 |
| H  | -3.22944257 | 0.01261838  | -4.44140455 |
| H  | -2.69706697 | 1.69319236  | -2.68079096 |
| H  | -0.40350928 | 1.83015639  | -1.78078655 |

|   |             |             |             |
|---|-------------|-------------|-------------|
| H | -0.41451977 | -3.35224428 | -3.20472458 |
| H | 1.13425038  | -5.30963409 | -7.47245435 |
| H | 1.71277582  | -2.97113621 | -6.92299697 |
| H | 1.18494297  | -0.55919115 | 0.96022726  |
| H | 1.38348908  | 1.08891706  | 0.29519092  |
| H | -0.03002366 | 0.09292753  | -0.18363270 |
| H | 4.26232024  | 6.10839504  | 1.98176514  |
| H | -0.98335508 | 7.56036998  | 2.05667007  |
| H | -5.26406767 | 4.48934145  | 3.47174197  |
| H | -5.84879218 | -0.78388415 | 4.87804916  |
| H | -1.52839125 | -3.95145120 | 5.89119876  |
| H | 3.92525286  | -3.51719328 | 5.25680447  |
| H | 5.08237035  | 1.40916688  | 4.09133286  |

B-CD:cis-(1S,4S)-SRT\_5\_CI E(Ha)= -5903.2932691077

|   |             |             |              |
|---|-------------|-------------|--------------|
| O | -6.83080711 | -0.39449937 | -4.36790717  |
| O | 6.41344030  | -2.62212488 | -3.86020703  |
| O | 6.36141952  | 3.45903924  | -3.46874918  |
| O | 6.53622096  | 0.13218605  | 1.24660973   |
| O | 5.40432987  | 2.60605059  | 1.49189585   |
| O | 0.80033609  | 5.06463985  | 1.54129365   |
| O | 3.51560235  | 4.67677076  | 1.70555892   |
| O | 1.43597286  | 7.20505052  | -3.10637696  |
| O | -4.21336168 | 5.09283278  | -4.21777865  |
| O | -1.79039803 | 5.99029869  | 0.98257267   |
| O | -4.02728826 | 4.40736678  | 0.87324076   |
| O | -6.07662836 | -0.34411519 | 0.70507621   |
| O | -5.97094962 | 2.39341830  | 0.65764486   |
| O | -3.86277231 | -5.74473117 | -4.21694210  |
| O | -5.89838164 | -3.14754195 | 0.52452511   |
| O | -3.81897415 | -4.88785995 | 0.83250214   |
| O | 2.12654717  | -7.02692045 | -3.41652540  |
| O | -1.24378641 | -5.88241684 | 1.20534891   |
| O | 1.39712178  | -5.14728894 | 1.32797276   |
| O | 5.12080442  | -0.67109761 | -1.02068732  |
| O | 5.55791191  | -2.50902799 | 1.19965453   |
| O | 4.18462213  | -4.88055133 | 1.01397410   |
| O | 4.44935820  | -3.96083920 | -2.48168234  |
| O | 2.57865726  | -4.25452007 | -1.15796809  |
| O | -0.29876808 | -6.23413481 | -2.27892987  |
| O | -1.79258615 | -4.76239993 | -1.29616498  |
| O | -4.83366083 | -3.54655614 | -2.91847589  |
| O | -4.82503282 | -1.66411453 | -1.57236752  |
| O | -5.69979809 | 1.64295570  | -2.87979326  |
| O | -4.18253037 | 2.65850763  | -1.45368340  |
| O | -2.02467058 | 5.38989843  | -2.58432232  |
| O | -0.36163795 | 4.81793751  | -1.08050804  |
| O | 3.17896092  | 5.42786756  | -1.82804529  |
| O | 3.77430312  | 3.44188788  | -0.79528239  |
| O | 6.11147209  | 1.03022606  | -2.24069383  |
| C | 5.13197362  | 2.77829845  | -3.44844706  |
| C | 1.41557301  | 5.81584762  | -3.33324405  |
| C | -3.29889825 | 4.04399671  | -4.01770001  |
| C | -5.43863853 | -0.27113483 | -4.20941154  |
| C | -3.07336914 | -4.59384066 | -4.05087515  |
| C | 1.57924701  | -5.74315991 | -3.60188381  |
| C | 5.12020423  | -2.08821783 | -3.71838101  |
| C | 4.73351070  | -4.24660830 | -0.12777259  |
| C | 4.75838517  | -2.74394444 | 0.06745797   |
| C | 5.27523818  | -2.07265721 | -1.19194362  |
| C | 4.47759818  | -2.53171880 | -2.41422406  |
| C | 3.91848061  | -4.61501822 | -1.36218910  |
| C | 0.77559066  | -5.29693115 | -2.39253801  |
| C | 1.61280746  | -5.29195814 | -1.111103170 |
| C | 0.72479204  | -5.04447196 | 0.09243174   |
| C | -0.38401910 | -6.08090263 | 0.10025604   |
| C | -1.17475744 | -6.01136943 | -1.20287850  |
| C | -3.44254771 | -3.85055845 | -2.77722972  |
| C | -3.19223568 | -4.69807459 | -1.52758678  |
| C | -3.84029355 | -4.06681537 | -0.30759712  |
| C | -5.30061425 | -3.78023880 | -0.59104218  |

|   |             |             |             |
|---|-------------|-------------|-------------|
| C | -5.43172188 | -2.89932245 | -1.82727640 |
| C | -6.12596953 | 1.64083614  | -0.53111387 |
| C | -5.46154573 | 0.28571676  | -0.38961498 |
| C | -5.59840228 | -0.48111098 | -1.69253190 |
| C | -5.08386590 | 0.35105433  | -2.86912700 |
| C | -5.53429183 | 2.40117786  | -1.71187208 |
| C | -2.67005699 | 4.11260603  | -2.63534375 |
| C | -3.71207333 | 3.99404582  | -1.52117694 |
| C | -3.09638236 | 4.32967708  | -0.17435334 |
| C | -2.42485709 | 5.68588638  | -0.24816847 |
| C | -1.40139404 | 5.71694677  | -1.37643388 |
| C | 2.94085913  | 5.22671097  | 0.53564628  |
| C | 1.51304355  | 4.74066414  | 0.36763489  |
| C | 0.93690125  | 5.35601061  | -0.89147734 |
| C | 1.82895592  | 5.03892920  | -2.09487396 |
| C | 3.75739900  | 4.83408075  | -0.69343304 |
| C | 6.23829516  | 0.15819108  | -1.14746293 |
| C | 6.39167284  | 0.98285120  | 0.12588326  |
| C | 5.18688692  | 1.88380935  | 0.30436342  |
| C | 5.01760682  | 2.76506241  | -0.92051916 |
| C | 4.99491805  | 1.92264269  | -2.19871326 |
| H | -7.19158237 | 0.50126562  | -4.29239564 |
| H | 6.31239777  | -3.58452534 | -3.81438809 |
| H | 7.04553619  | 2.77490423  | -3.41878821 |
| H | 4.66738325  | 3.24049711  | 1.60833885  |
| H | -0.11491503 | 5.32947426  | 1.29985481  |
| H | 2.35034169  | 7.43207240  | -2.88213111 |
| H | -3.71255973 | 5.91363568  | -4.10111859 |
| H | -4.61380080 | 3.62119191  | 0.83732953  |
| H | -5.88240140 | -1.30539214 | 0.67096660  |
| H | -4.78223963 | -5.43947594 | -4.21456343 |
| H | -2.88886036 | -5.12833930 | 1.02692962  |
| H | 1.37692860  | -7.62136879 | -3.26499870 |
| H | 2.34709379  | -4.93674898 | 1.19396194  |
| H | 5.76752061  | -1.55262964 | 1.24651557  |
| H | 5.00736560  | 2.13718494  | -4.33466235 |
| H | 4.34565115  | 3.53863371  | -3.45844150 |
| H | 2.07538839  | 5.53051394  | -4.16623827 |
| H | 0.38893200  | 5.55135796  | -3.60255757 |
| H | -3.85849960 | 3.10962079  | -4.11594311 |
| H | -2.49848960 | 4.05159988  | -4.77335999 |
| H | -5.02005712 | -1.28015838 | -4.26398887 |
| H | -4.99047791 | 0.33457432  | -5.01203380 |
| H | -2.03305318 | -4.92564521 | -3.98846406 |
| H | -3.16959527 | -3.90754698 | -4.90641259 |
| H | 2.41728362  | -5.05722837 | -3.75571235 |
| H | 0.93197532  | -5.70294799 | -4.49106359 |
| H | 5.22206882  | -0.99922469 | -3.72297417 |
| H | 4.46581760  | -2.37994025 | -4.55417600 |
| H | 5.76420620  | -4.59736799 | -0.28476086 |
| H | 3.72474767  | -2.39753044 | 0.23423915  |
| H | 6.33256486  | -2.32658250 | -1.34429498 |
| H | 3.45373639  | -2.13911778 | -2.34165320 |
| H | 3.99609051  | -5.68471806 | -1.58443851 |
| H | 0.37705651  | -4.28630253 | -2.55968470 |
| H | 2.10637519  | -6.26757818 | -1.00898572 |
| H | 0.27324926  | -4.04599681 | -0.00937173 |
| H | 0.06929168  | -7.08140162 | 0.16234847  |

|    |             |             |             |
|----|-------------|-------------|-------------|
| H  | -1.91624730 | -6.81595306 | -1.25528233 |
| H  | -2.86301971 | -2.92052968 | -2.69581039 |
| H  | -3.60239655 | -5.70302675 | -1.69344699 |
| H  | -3.33029716 | -3.10868853 | -0.11528296 |
| H  | -5.81454693 | -4.73064560 | -0.79761991 |
| H  | -6.48169348 | -2.76180466 | -2.10714232 |
| H  | -7.19606290 | 1.48680125  | -0.73332789 |
| H  | -4.38631227 | 0.44269849  | -0.20122826 |
| H  | -6.65400661 | -0.72737458 | -1.86743192 |
| H  | -3.99361474 | 0.45697245  | -2.77881788 |
| H  | -6.07626498 | 3.33635355  | -1.88902704 |
| H  | -1.92600077 | 3.31260050  | -2.51673595 |
| H  | -4.53831835 | 4.68461863  | -1.73599703 |
| H  | -2.32622605 | 3.56861044  | 0.03906011  |
| H  | -3.19079215 | 6.44490911  | -0.46345764 |
| H  | -0.99863820 | 6.72537793  | -1.51886602 |
| H  | 2.94142072  | 6.32451692  | 0.60471827  |
| H  | 1.54541260  | 3.64863319  | 0.23744126  |
| H  | 0.88334021  | 6.44661808  | -0.77403128 |
| H  | 1.78122474  | 3.95969443  | -2.29719296 |
| H  | 4.77576857  | 5.23338208  | -0.63655049 |
| H  | 7.13872075  | -0.43267267 | -1.34663077 |
| H  | 7.29048637  | 1.60753714  | 0.01580427  |
| H  | 4.29013026  | 1.24847502  | 0.38786401  |
| H  | 5.84343392  | 3.48580471  | -0.98450937 |
| H  | 4.05688074  | 1.35080165  | -2.22791921 |
| Cl | 0.78106952  | -2.35349630 | 2.32335031  |
| Cl | 0.60890172  | -0.41980870 | -0.21319752 |
| N  | 1.42305125  | -0.08627486 | 8.10045314  |
| C  | 0.37627471  | 1.04125761  | 8.19364139  |
| C  | 0.95569053  | 2.26192487  | 7.49377511  |
| C  | 1.04923542  | 2.03254065  | 5.98925482  |
| C  | -0.32073559 | 1.73258593  | 5.35974477  |
| C  | -2.43339623 | 0.41539007  | 5.72339445  |
| C  | -3.33836624 | -0.28603599 | 6.50902886  |
| C  | -3.05254603 | -0.54138058 | 7.84959549  |
| C  | -1.84893433 | -0.10125877 | 8.38031520  |
| C  | -0.91854177 | 0.58270180  | 7.58404232  |
| C  | -1.21333996 | 0.86730195  | 6.23932554  |
| C  | -0.13718863 | 1.18288467  | 3.95782439  |
| C  | 0.15906101  | -0.16641775 | 3.76369416  |
| C  | 0.40090634  | -0.68029560 | 2.49330090  |
| C  | 0.32942275  | 0.17060587  | 1.38261053  |
| C  | 0.02927427  | 1.51739450  | 1.56945423  |
| C  | -0.19272661 | 2.02272767  | 2.84547479  |
| C  | 1.15247285  | -1.31358138 | 8.89720105  |
| H  | 1.50935758  | -0.33953272 | 7.11079760  |
| H  | 2.33225707  | 0.30174392  | 8.37401662  |
| H  | 0.26733750  | 1.21034794  | 9.27034250  |
| H  | 0.28422954  | 3.10198628  | 7.70663555  |
| H  | 1.93134805  | 2.53305802  | 7.92030086  |
| H  | 1.48415893  | 2.91080492  | 5.50208618  |
| H  | 1.74591775  | 1.21209889  | 5.75537614  |
| H  | -0.84426820 | 2.69564936  | 5.26593355  |
| H  | -2.67347197 | 0.62644184  | 4.68499196  |
| H  | -4.27782477 | -0.62106268 | 6.07935362  |
| H  | -3.76754054 | -1.06530089 | 8.47635414  |
| H  | -1.63500062 | -0.26743490 | 9.43467553  |

|   |             |             |            |
|---|-------------|-------------|------------|
| H | 0.18217845  | -0.85529434 | 4.60453733 |
| H | -0.03163660 | 2.17180445  | 0.70626384 |
| H | -0.39199564 | 3.08526942  | 2.95448718 |
| H | 1.96941085  | -2.02084303 | 8.74424986 |
| H | 1.08724594  | -1.03970427 | 9.95126175 |
| H | 0.20959273  | -1.74407429 | 8.56075516 |
| H | 6.36557461  | 0.70672911  | 2.01184231 |
| H | 2.82477305  | 4.75559167  | 2.38300058 |
| H | -2.44956058 | 5.76078323  | 1.65943861 |
| H | -6.15192026 | 1.76368491  | 1.37519698 |
| H | -5.55463597 | -3.63610996 | 1.29211508 |
| H | -0.65778992 | -5.69531577 | 1.95634138 |
| H | 4.61327063  | -4.44158781 | 1.76788611 |



B-CD:cis-(1S,4S)-SRT\_6\_CI E(Ha)= -5903.2918675359

|   |             |             |             |
|---|-------------|-------------|-------------|
| O | 1.04138524  | -7.33847092 | -0.61333890 |
| O | 1.94242939  | 6.94241923  | -1.48311342 |
| O | -4.06848499 | 6.11084054  | -1.47946048 |
| O | -1.07491203 | 6.39614519  | 3.52990137  |
| O | -3.48215991 | 5.03426573  | 3.51339093  |
| O | -6.19060257 | 0.60334537  | 3.19146938  |
| O | -5.75405431 | 3.34183911  | 3.19424663  |
| O | -6.64758561 | 0.64052123  | -1.94966277 |
| O | -4.18706615 | -4.72400912 | -1.92239211 |
| O | -6.39971678 | -2.21762863 | 2.86754801  |
| O | -4.64060943 | -4.30662752 | 3.23371980  |
| O | 0.55238576  | -5.33692348 | 4.09030093  |
| O | -2.19003895 | -5.48400723 | 3.87732298  |
| O | 5.88683867  | -3.58682451 | -1.18141723 |
| O | 3.34653673  | -4.87024480 | 3.95997659  |
| O | 4.94417434  | -2.60609859 | 3.79460632  |
| O | 5.70201393  | 2.32119795  | -2.01978300 |
| O | 6.43377296  | -0.24248200 | 3.20816692  |
| O | 5.74460307  | 2.42816177  | 3.21478891  |
| O | 0.00338166  | 5.28566199  | 1.22981478  |
| O | 1.69376547  | 5.82294270  | 3.54024552  |
| O | 4.21624126  | 4.75625924  | 3.39379914  |
| O | 3.39738461  | 5.07917184  | -0.12576223 |
| O | 3.84208161  | 3.18182660  | 1.11943135  |
| O | 5.56757203  | 0.27855952  | -0.27242998 |
| O | 4.67559475  | -1.15388045 | 1.29772381  |
| O | 3.83765771  | -4.59659063 | 0.38008737  |
| O | 1.89514670  | -4.51331951 | 1.62467922  |
| O | -1.18254362 | -6.10680663 | 0.45202577  |
| O | -2.40744549 | -4.35088525 | 1.32521613  |
| O | -5.06129508 | -2.61226262 | -0.47705352 |
| O | -4.98785501 | -0.80461038 | 0.96039575  |
| O | -5.51528128 | 2.57849689  | -0.33999344 |
| O | -3.95751637 | 3.47995576  | 1.10983877  |
| O | -1.73115508 | 6.15535054  | -0.02713009 |
| C | -3.20774948 | 5.00050847  | -1.43142068 |
| C | -5.26728326 | 0.67420217  | -1.68184108 |
| C | -3.28909416 | -3.73093863 | -1.50406413 |
| C | 0.78253531  | -5.97352089 | -0.81297497 |
| C | 4.61737190  | -2.98861077 | -1.13440895 |
| C | 4.45161070  | 1.88346073  | -1.55350111 |
| C | 1.51141155  | 5.60736386  | -1.40383021 |
| C | 3.56001598  | 5.26694435  | 2.25233787  |
| C | 2.05859227  | 5.11190997  | 2.38793946  |
| C | 1.37844446  | 5.61675015  | 1.12788497  |
| C | 1.97169018  | 4.94950040  | -0.11384101 |
| C | 4.05998291  | 4.55802974  | 0.99806093  |
| C | 4.55032005  | 1.27986343  | -0.16260709 |
| C | 4.93023494  | 2.29777825  | 0.91308383  |
| C | 5.21470482  | 1.58676421  | 2.22735909  |
| C | 6.24477508  | 0.49360718  | 2.01760012  |
| C | 5.81888168  | -0.45362287 | 0.90173741  |
| C | 3.94517304  | -3.18218743 | 0.21295308  |
| C | 4.73745179  | -2.56877064 | 1.36719170  |
| C | 4.14330005  | -2.97255984 | 2.70427400  |
| C | 3.99439499  | -4.48122296 | 2.76689449  |

|   |             |             |             |
|---|-------------|-------------|-------------|
| C | 3.20446689  | -5.00181200 | 1.57061436  |
| C | -1.33714164 | -5.87217544 | 2.82236022  |
| C | -0.05159080 | -5.06747770 | 2.85406005  |
| C | 0.81879328  | -5.44114435 | 1.66705250  |
| C | 0.03023103  | -5.36475338 | 0.35875641  |
| C | -2.04580264 | -5.68938001 | 1.48483843  |
| C | -3.73820887 | -3.07686020 | -0.20771752 |
| C | -3.74958495 | -4.04735879 | 0.97330479  |
| C | -4.42868285 | -3.41014157 | 2.17508332  |
| C | -5.79898636 | -2.89161141 | 1.78291138  |
| C | -5.69757727 | -1.94793060 | 0.58917085  |
| C | -5.98359218 | 2.60929272  | 2.00823134  |
| C | -5.46398203 | 1.18972173  | 2.14463464  |
| C | -5.62070718 | 0.45998936  | 0.82267186  |
| C | -4.97370237 | 1.25600741  | -0.31055485 |
| C | -5.31795062 | 3.32397410  | 0.83701250  |
| C | -0.95074252 | 6.30225411  | 1.13271334  |
| C | -1.85511302 | 6.25643299  | 2.35982677  |
| C | -2.64184542 | 4.96085698  | 2.39247302  |
| C | -3.39806966 | 4.78431862  | 1.08810049  |
| C | -2.46077600 | 4.92728872  | -0.11085322 |
| H | 0.18269464  | -7.75093524 | -0.43408569 |
| H | 2.89976418  | 6.92006422  | -1.33341863 |
| H | -3.51811546 | 6.88402933  | -1.28343067 |
| H | -4.15840544 | 4.32823771  | 3.45023099  |
| H | -6.09644279 | -0.37006331 | 3.14103415  |
| H | -6.96718846 | 1.54609041  | -1.81852447 |
| H | -5.06546979 | -4.31420356 | -1.89017708 |
| H | -3.77204504 | -4.61212832 | 3.56709217  |
| H | 1.47623388  | -5.01169980 | 4.07319287  |
| H | 5.76405533  | -4.50295060 | -0.88879296 |
| H | 5.30472993  | -1.70830135 | 3.63906760  |
| H | 6.31997344  | 1.59930294  | -1.82565536 |
| H | 5.12113698  | 3.16873646  | 3.37162165  |
| H | 0.71580887  | 5.87540428  | 3.58669217  |
| H | -2.47115854 | 5.02466260  | -2.25167047 |
| H | -3.82746452 | 4.10718842  | -1.55118366 |
| H | -4.72259646 | 1.26508000  | -2.43604713 |
| H | -4.90837882 | -0.35827597 | -1.72409764 |
| H | -2.31926710 | -4.21362666 | -1.35212507 |
| H | -3.17179225 | -2.94231912 | -2.26843419 |
| H | 1.75277034  | -5.47722481 | -0.92023740 |
| H | 0.19528313  | -5.80344083 | -1.73147761 |
| H | 4.75460606  | -1.91942389 | -1.32225246 |
| H | 3.94996032  | -3.39820722 | -1.91370368 |
| H | 3.78869510  | 2.75306553  | -1.52724198 |
| H | 4.01002846  | 1.12839094  | -2.22861526 |
| H | 0.41803973  | 5.61923471  | -1.43705354 |
| H | 1.88029381  | 5.01109720  | -2.25474793 |
| H | 3.78948303  | 6.33725881  | 2.13912667  |
| H | 1.82670099  | 4.03848048  | 2.49054163  |
| H | 1.50859941  | 6.70418044  | 1.04697351  |
| H | 1.69025526  | 3.88715015  | -0.11057973 |
| H | 5.12316709  | 4.76523024  | 0.83446755  |
| H | 3.59341212  | 0.81449025  | 0.11124816  |
| H | 5.82100746  | 2.85042705  | 0.58468294  |
| H | 4.27383359  | 1.11822497  | 2.56179597  |
| H | 7.19155450  | 0.96612046  | 1.71470179  |

|    |             |             |             |
|----|-------------|-------------|-------------|
| H  | 6.62582948  | -1.14857293 | 0.64571848  |
| H  | 2.94551258  | -2.72665206 | 0.19289348  |
| H  | 5.77886901  | -2.91231309 | 1.31363054  |
| H  | 3.13931832  | -2.52113418 | 2.77717823  |
| H  | 4.99879594  | -4.92852690 | 2.72307720  |
| H  | 3.20667120  | -6.09649749 | 1.54616328  |
| H  | -1.08319478 | -6.93857380 | 2.91815904  |
| H  | -0.31187343 | -3.99959053 | 2.76124849  |
| H  | 1.19732190  | -6.46305535 | 1.79841081  |
| H  | -0.19600790 | -4.30846360 | 0.15012027  |
| H  | -2.92322740 | -6.34080172 | 1.41661689  |
| H  | -3.08229410 | -2.22821315 | 0.03284854  |
| H  | -4.28436451 | -4.95979918 | 0.67765333  |
| H  | -3.81293509 | -2.55327942 | 2.49391177  |
| H  | -6.42138703 | -3.74793670 | 1.48133525  |
| H  | -6.69023996 | -1.68129204 | 0.21186671  |
| H  | -7.06322164 | 2.56036999  | 1.80127013  |
| H  | -4.38764334 | 1.23399540  | 2.38201851  |
| H  | -6.68798131 | 0.32913601  | 0.60157374  |
| H  | -3.88754599 | 1.29753951  | -0.14664465 |
| H  | -5.78928474 | 4.29474452  | 0.65066495  |
| H  | -0.46580876 | 7.27994383  | 1.03988044  |
| H  | -2.56568706 | 7.09293646  | 2.28282394  |
| H  | -1.92826452 | 4.12472727  | 2.48346026  |
| H  | -4.19016187 | 5.54118832  | 1.01660813  |
| H  | -1.76480060 | 4.07715728  | -0.11859243 |
| Cl | -0.42241663 | 2.30568556  | -2.26155358 |
| Cl | -0.18078669 | 0.87562959  | 0.58937580  |
| N  | 2.31906807  | -0.08203690 | -7.20865397 |
| C  | 1.85057756  | -1.54770749 | -7.27867178 |
| C  | 2.70140214  | -2.35061697 | -6.30530414 |
| C  | 2.38329374  | -1.96871181 | -4.86397826 |
| C  | 0.90308703  | -2.19614611 | -4.50864228 |
| C  | -1.42928478 | -1.98349722 | -5.42267597 |
| C  | -2.35059077 | -1.81531455 | -6.44786308 |
| C  | -1.91292333 | -1.57236696 | -7.74911136 |
| C  | -0.55145820 | -1.48973151 | -8.00173340 |
| C  | 0.38293272  | -1.63112630 | -6.96546944 |
| C  | -0.05182183 | -1.89761163 | -5.65590389 |
| C  | 0.56683868  | -1.44228169 | -3.23563928 |
| C  | 0.22685222  | -0.09101233 | -3.28338729 |
| C  | -0.00344184 | 0.63692064  | -2.12040369 |
| C  | 0.10178279  | 0.01120959  | -0.87229613 |
| C  | 0.43529528  | -1.34151330 | -0.81890790 |
| C  | 0.66574842  | -2.05895815 | -1.98760074 |
| C  | 1.75309434  | 0.84586740  | -8.22530832 |
| H  | 2.09207864  | 0.26691581  | -6.27188827 |
| H  | 3.34282672  | -0.07147605 | -7.27311407 |
| H  | 2.04751182  | -1.83811156 | -8.31619954 |
| H  | 2.47275499  | -3.40886712 | -6.47733676 |
| H  | 3.77115023  | -2.22764554 | -6.52272579 |
| H  | 3.01327297  | -2.54248031 | -4.17664926 |
| H  | 2.64847069  | -0.91776995 | -4.66762965 |
| H  | 0.78570929  | -3.26893799 | -4.29527297 |
| H  | -1.78011520 | -2.19568832 | -4.41587843 |
| H  | -3.41276755 | -1.89132843 | -6.23501848 |
| H  | -2.62672414 | -1.46585014 | -8.55999391 |
| H  | -0.20275821 | -1.33989846 | -9.02189138 |

|   |             |             |             |
|---|-------------|-------------|-------------|
| H | 0.10251381  | 0.41487114  | -4.23717231 |
| H | 0.51184164  | -1.82836045 | 0.14878722  |
| H | 0.92383324  | -3.11308408 | -1.92006223 |
| H | 2.16422000  | 1.84319473  | -8.05977335 |
| H | 2.02809695  | 0.48765420  | -9.21843167 |
| H | 0.66880904  | 0.85911583  | -8.11686792 |
| H | -1.66141716 | 6.14515058  | 4.26282892  |
| H | -6.03698237 | 2.75910199  | 3.91815883  |
| H | -6.23808892 | -2.78737674 | 3.63884341  |
| H | -1.62047846 | -5.38973690 | 4.65860171  |
| H | 3.78634827  | -4.37357378 | 4.66987935  |
| H | 6.50562136  | 0.42780684  | 3.90917035  |
| H | 3.68268234  | 5.05190392  | 4.15079569  |

B-CD:cis-(1S,4S)-SRT\_1\_MD E(Ha)= -5903.35862005

|   |               |               |               |
|---|---------------|---------------|---------------|
| O | 5.3961391826  | 0.7770469776  | 0.5411637492  |
| O | 4.4577861139  | -2.5476445214 | -0.6555580530 |
| O | 4.4319548253  | -4.3467298319 | 0.8062455386  |
| O | 1.2116719070  | -5.4188323310 | -0.5685313777 |
| O | -0.3723244043 | -6.3672343124 | 0.8287496959  |
| O | -3.0254729520 | -4.3742389422 | -0.7384174840 |
| O | -4.7254787735 | -3.5286202367 | 0.5744298286  |
| O | -5.6922631822 | 1.5832618612  | -0.1544117036 |
| O | -3.0677920098 | 3.7296593008  | -1.5668225581 |
| O | -2.1764650599 | 5.4579887148  | -0.3309442682 |
| O | 1.1210223648  | 4.8069036565  | -1.8031539483 |
| O | 2.8521952326  | 5.0936640187  | -0.3007915559 |
| O | 2.6911300580  | 5.4445524023  | -3.9007152423 |
| O | 4.7568569809  | 3.5263810416  | -3.5523006887 |
| O | 4.4468292633  | 1.9312527609  | -1.2260617448 |
| O | -0.3537555155 | 5.7339334723  | -4.0287668641 |
| O | -3.1096903707 | 5.3214207692  | -3.8412630606 |
| O | -0.1133582201 | 4.6515458344  | 1.9755575040  |
| O | -4.6304407647 | 2.9194229608  | -3.8660864717 |
| O | -5.9263017822 | 0.5070357599  | -3.6048219271 |
| O | -3.2954317790 | 3.6811411289  | 1.5269558804  |
| O | -4.7837437164 | -4.8097505601 | -2.8098446783 |
| O | -5.7698888803 | -2.2421467064 | -3.1472983226 |
| O | -2.2492092428 | -6.2027819247 | -2.7959522036 |
| O | 0.4143605293  | -7.0323857216 | -2.6430954655 |
| O | -2.7646180217 | -4.1211238753 | 2.3537249847  |
| O | 2.7076975414  | -3.9634400279 | 3.0750668883  |
| O | 5.2888350840  | -4.2254823435 | -2.7099230181 |
| O | 3.0987746253  | -5.9351070935 | -2.7351975011 |
| O | 6.3313885966  | -1.6006948614 | -2.6377490251 |
| O | 6.4467516108  | 1.1810221088  | -2.8983690978 |
| O | 3.2839521385  | 0.1183047013  | 2.4265666142  |
| O | 2.2392573665  | 3.3603122776  | 2.0144747996  |
| O | -3.4652236722 | -1.3521252753 | 2.4760722441  |
| O | -4.8431398218 | -0.3179146869 | -1.1800756777 |
| C | 4.5456928352  | -0.3640156008 | 0.4125294952  |
| C | 5.2669079838  | -1.4016256128 | -0.4456040293 |
| C | 5.5465418493  | -0.7834251310 | -1.8122576013 |
| C | 6.3137046995  | 0.5176862488  | -1.6607772289 |
| C | 5.6352669558  | 1.4515543365  | -0.6653293888 |
| C | 4.9930427805  | -3.8071052301 | -0.3641559374 |
| C | 3.0148576760  | -4.5160178887 | 0.7399087818  |
| C | 2.6202840290  | -5.4603590079 | -0.3934690293 |
| C | 3.2385654504  | -4.9961617023 | -1.7025184762 |
| C | 4.7266740448  | -4.7569039531 | -1.5295170094 |
| C | 0.4487599663  | -6.5569261569 | -0.2951095597 |
| C | -0.4132999317 | -6.8789139708 | -1.5097538115 |
| C | -1.4376509476 | -5.7839847433 | -1.7317622586 |
| C | -2.2351299941 | -5.5259076101 | -0.4609666749 |
| C | -1.3052714592 | -5.2885159611 | 0.7331396162  |
| C | -4.3926426414 | -4.4028842376 | -0.4877704259 |
| C | -4.3718135093 | -2.1486039385 | 0.3382758939  |
| C | -5.2073872890 | -1.6500187294 | -0.8404257448 |
| C | -4.9331678775 | -2.5228362641 | -2.0598217435 |
| C | -5.1651598537 | -3.9858168957 | -1.7317167539 |
| C | -5.8405647151 | 0.6581799950  | -1.2079485969 |

|   |               |               |               |
|---|---------------|---------------|---------------|
| C | -5.7963867079 | 1.4108462117  | -2.5321493702 |
| C | -4.5142904295 | 2.2121238821  | -2.6615030656 |
| C | -4.3499915498 | 3.1189657568  | -1.4528701527 |
| C | -4.4674342553 | 2.3123896398  | -0.1539167981 |
| C | -2.9536740306 | 5.1149784449  | -1.4669885527 |
| C | -2.3160450683 | 5.6818259866  | -2.7328458755 |
| C | -0.9062145902 | 5.1579062622  | -2.8767885560 |
| C | -0.1015765620 | 5.4937509219  | -1.6366966565 |
| C | -0.7971723633 | 5.0211400288  | -0.3584205847 |
| C | 2.3245714919  | 5.4710804195  | -1.5454843743 |
| C | 3.0992103816  | 3.6860078166  | -0.1950955995 |
| C | 4.1965190019  | 3.3226698373  | -1.1959641599 |
| C | 3.7399101946  | 3.6888017285  | -2.6020388379 |
| C | 3.3052016570  | 5.1421625897  | -2.6665034495 |
| C | 3.4377729270  | 3.3765439538  | 1.2424034330  |
| C | -0.1224381850 | 5.5706513541  | 0.8959527229  |
| C | -4.5454774020 | 3.1624924068  | 1.1118751002  |
| C | -4.5964826373 | -1.3946467795 | 1.6417304339  |
| C | -1.9787709921 | -5.2620703915 | 2.1067470070  |
| C | 2.5833847793  | -4.9882392082 | 2.1120975505  |
| C | 4.1890508728  | -0.7923167666 | 1.8229097962  |
| H | 3.6183193934  | -0.0737633550 | -0.1041078412 |
| H | 6.2152946007  | -1.6834690293 | 0.0349371196  |
| H | 4.5698648423  | -0.5617979621 | -2.2743446712 |
| H | 7.3044421841  | 0.2697243622  | -1.2498980592 |
| H | 6.3019363370  | 2.2844140575  | -0.4130367168 |
| H | 6.0701757977  | -3.7345269231 | -0.1745611997 |
| H | 2.5483602396  | -3.5436860774 | 0.5325532218  |
| H | 2.9542003723  | -6.4862360558 | -0.1783193606 |
| H | 2.7696022744  | -4.0345550885 | -1.9672077141 |
| H | 5.2066421478  | -5.7153474859 | -1.2801395881 |
| H | 1.0955668923  | -7.4064607874 | -0.0460885156 |
| H | -0.9493937742 | -7.8166989798 | -1.3001906154 |
| H | -0.8993721210 | -4.8535353001 | -1.9755551581 |
| H | -2.8817519027 | -6.3940774982 | -0.2619894566 |
| H | -0.7784734480 | -4.3389099195 | 0.5710266278  |
| H | -4.7114034055 | -5.3998037133 | -0.1594950996 |
| H | -3.3075249391 | -2.0857643518 | 0.0780451901  |
| H | -6.2750432803 | -1.6998235630 | -0.5811194179 |
| H | -3.8697276371 | -2.3915402689 | -2.3208040384 |
| H | -6.2356392779 | -4.1164724521 | -1.5112687722 |
| H | -6.8285106591 | 0.2081830256  | -1.0592719339 |
| H | -6.6373931303 | 2.1205616623  | -2.5287703840 |
| H | -3.6606640561 | 1.5148510862  | -2.6771899171 |
| H | -5.1389818589 | 3.8857219325  | -1.4788134207 |
| H | -3.6096614270 | 1.6292728958  | -0.0740329787 |
| H | -3.9338759052 | 5.5779059878  | -1.2991262853 |
| H | -2.2804636738 | 6.7770371863  | -2.6304644824 |
| H | -0.9518613259 | 4.0600010284  | -2.9569682665 |
| H | 0.0655524572  | 6.5815427750  | -1.6056426589 |
| H | -0.7650338312 | 3.9252090408  | -0.3382948310 |
| H | 2.1613614732  | 6.5542925347  | -1.4887692961 |
| H | 2.1917877394  | 3.1255214574  | -0.4554664166 |
| H | 5.1174326975  | 3.8759576274  | -0.9583971112 |
| H | 2.8651185661  | 3.0579300305  | -2.8333716200 |
| H | 4.1975735019  | 5.7673834398  | -2.5124426549 |
| H | 3.2792277608  | 5.0962929703  | -4.5836928818 |
| H | 5.1629597497  | 2.6494191050  | -3.4270144621 |

|    |               |               |               |
|----|---------------|---------------|---------------|
| H  | 3.9165711153  | 2.3937771244  | 1.2947648046  |
| H  | 4.1317455437  | 4.1381247339  | 1.6243173856  |
| H  | 0.5836092626  | 5.4746617896  | -4.0812023215 |
| H  | -2.5790708325 | 5.5292306266  | -4.6234096930 |
| H  | 0.9094609528  | 5.8480547789  | 0.6639319190  |
| H  | -0.6584872002 | 6.4761678138  | 1.2042386215  |
| H  | 0.7681468893  | 4.2067986267  | 1.9988752477  |
| H  | -3.9483332849 | 3.6139354704  | -3.9045730022 |
| H  | -5.7077744406 | 1.0048211068  | -4.4045288568 |
| H  | -5.2871439174 | 3.9637549433  | 0.9794270204  |
| H  | -4.9036491097 | 2.5135498293  | 1.9157972949  |
| H  | -2.9471353580 | 4.3131138294  | 0.8670864955  |
| H  | -5.4708211714 | -1.8403775266 | 2.1429159257  |
| H  | -5.1657218433 | -4.3986538468 | -3.5979303901 |
| H  | -5.6720166646 | -1.3042685671 | -3.3955480203 |
| H  | -2.9980134701 | -5.5860669621 | -2.8874624691 |
| H  | -0.1820712314 | -7.0636001600 | -3.4033963106 |
| H  | -2.5581167485 | -6.1880841707 | 2.2392922681  |
| H  | -1.1831645396 | -5.2753456956 | 2.8578275479  |
| H  | -3.5641028559 | -4.1388829161 | 1.7995593240  |
| H  | 3.1704237391  | -5.8776731186 | 2.3863727548  |
| H  | 1.5296975189  | -5.2797024498 | 2.0827817210  |
| H  | 3.6499255076  | -3.7745300609 | 3.1508973223  |
| H  | 4.9182929843  | -4.7432861716 | -3.4376514560 |
| H  | 2.1569240708  | -6.1740987454 | -2.8116934225 |
| H  | 5.8676547959  | -2.4458613768 | -2.7864378886 |
| H  | 6.7238760684  | 0.5011920606  | -3.5277850740 |
| H  | 5.0961531991  | -0.7863138427 | 2.4356858016  |
| H  | 3.7839356413  | -1.8110249162 | 1.8142809417  |
| H  | 2.4150966901  | -0.0486755299 | 2.0418085714  |
| H  | 2.3616623035  | 2.7652912007  | 2.7649707866  |
| H  | -3.1236799297 | -2.2520360166 | 2.6078226403  |
| H  | -4.8463592671 | -0.3562421775 | 1.4040298171  |
| Cl | 0.0255690006  | 1.2561401006  | -1.0139280757 |
| H  | -3.6302720748 | 5.5304028007  | 4.6998286829  |
| Cl | 0.8167361362  | -1.8165190618 | -1.0467417125 |
| C  | 0.0239839873  | 0.3244045904  | 0.4456992558  |
| C  | -2.6988055631 | 5.7193289203  | 4.1631412482  |
| H  | -2.9185753120 | 6.2375030478  | 3.2285669827  |
| H  | -0.5946575098 | 1.9902125275  | 1.6236117123  |
| C  | -0.3385203361 | 0.9353604998  | 1.6408523518  |
| C  | 0.3778813512  | -1.0302744454 | 0.4266873743  |
| H  | -1.1582290801 | 4.6133294139  | 3.3031320388  |
| H  | -2.0395070022 | 6.3331941393  | 4.7783417878  |
| N  | -2.0370173410 | 4.4361623704  | 3.8529486651  |
| H  | -2.6255285813 | 3.9455805349  | 3.1453203686  |
| H  | -2.3938870808 | 1.8721877090  | 2.9855701670  |
| C  | 1.9815228225  | 3.7513829368  | 5.6869235172  |
| C  | -0.3817256518 | 0.2074562763  | 2.8334621664  |
| C  | 0.3744129522  | -1.7482745158 | 1.6197707245  |
| C  | 0.6346823185  | 4.0715514286  | 5.6171996007  |
| C  | 2.4067695977  | 2.5021564781  | 5.2347537087  |
| H  | 2.6916531326  | 4.4583810376  | 6.1036883037  |
| C  | -0.2979136405 | 3.1676825134  | 5.0922027456  |
| H  | 0.2910136430  | 5.0340233128  | 5.9912240841  |
| C  | -1.7549942988 | 3.5631268545  | 5.0654895968  |
| C  | 1.4871584216  | 1.5982337870  | 4.7146717113  |
| H  | 3.4551599827  | 2.2244371231  | 5.2934796176  |

|   |               |               |              |
|---|---------------|---------------|--------------|
| C | 0.1239389320  | 1.9149130542  | 4.6278815141 |
| C | -2.2897430040 | 1.3808084840  | 3.9601772152 |
| H | 1.8406378927  | 0.6339398387  | 4.3597803162 |
| C | -0.0084658629 | -1.1352683768 | 2.8074092191 |
| C | -0.8527187104 | 0.8626421581  | 4.1180111971 |
| H | 0.6798959184  | -2.7874584695 | 1.6220121114 |
| H | -1.9629152737 | 4.1994968925  | 5.9316235485 |
| C | -2.6768138601 | 2.3518135320  | 5.0669193299 |
| H | -3.7217777032 | 2.6699526890  | 4.9636023682 |
| H | -2.9672195953 | 0.5229946501  | 3.9228070019 |
| H | -0.0141344925 | -1.7232102043 | 3.7203109337 |
| H | -0.8695079065 | 0.0774375900  | 4.8867953051 |
| H | -2.5928877858 | 1.8732046583  | 6.0493208434 |



B-CD:cis-(1S,4S)-SRT\_2\_MD E(Ha)= -5903.35360389

|   |               |               |               |
|---|---------------|---------------|---------------|
| O | 5.2117311967  | 1.5849302462  | 1.1989778014  |
| O | 4.8118913272  | -1.8826646013 | 0.1466177656  |
| O | 5.0148797632  | -3.6934396138 | 1.5737427953  |
| O | 2.0140854576  | -5.1702424103 | 0.0868027654  |
| O | 0.4611663529  | -6.3689682078 | 1.3031475005  |
| O | -2.2739554976 | -4.7809423078 | -0.5432009478 |
| O | -4.1498371222 | -4.0582704650 | 0.6015107957  |
| O | -5.7760479394 | 0.7293881870  | -0.8191282761 |
| O | -3.2649664733 | 3.1077573583  | -2.0403699143 |
| O | -2.7876381081 | 5.0162238246  | -0.8404318214 |
| O | 0.7283581304  | 4.8309172374  | -1.8695140745 |
| O | 2.1901530529  | 5.4408613333  | -0.1860687037 |
| O | 2.4325734762  | 5.6114151768  | -3.7932798361 |
| O | 4.6838965848  | 4.0236809647  | -3.0931026020 |
| O | 4.3165668256  | 2.5062750060  | -0.7271192112 |
| O | -0.5793582830 | 5.3852442265  | -4.3118791993 |
| O | -3.2447209074 | 4.5371165785  | -4.4109607832 |
| O | -0.9585055135 | 4.6163533419  | 1.7388567584  |
| O | -4.3151040086 | 1.8867423993  | -4.4685596925 |
| O | -5.3314683002 | -0.6534906249 | -4.1385200310 |
| O | -3.9405199344 | 3.2410988856  | 0.9792036902  |
| O | -3.8194080596 | -5.7043357931 | -2.6067151419 |
| O | -5.0815801057 | -3.3240940609 | -3.3103460877 |
| O | -1.0207928813 | -6.5038267187 | -2.5141662164 |
| O | 1.6890527379  | -6.9152400092 | -2.0623477537 |
| O | -2.0634020902 | -6.7654254057 | 2.5076553033  |
| O | 4.1520200528  | -5.8851775091 | 3.0256363784  |
| O | 5.9679475065  | -3.4163027396 | -1.9105365822 |
| O | 4.0414756536  | -5.3669016155 | -2.0456846013 |
| O | 6.8156167623  | -0.7918075838 | -1.6942598599 |
| O | 6.5666621587  | 1.9561336122  | -2.1324120621 |
| O | 3.0071570766  | 0.7588105010  | 2.8922117289  |
| O | 1.5349647685  | 3.6414217385  | 2.1152399037  |
| O | -3.7895981923 | -2.1191573565 | 2.5795955383  |
| O | -4.5197579956 | -1.0929144008 | -1.5070422825 |
| C | 4.5299676484  | 0.3407699774  | 1.0488825445  |
| C | 5.4679054907  | -0.6413212462 | 0.3462459954  |
| C | 5.8330008791  | -0.0577094996 | -1.0174387989 |
| C | 6.3932623320  | 1.3479956465  | -0.8718864803 |
| C | 5.4893868540  | 2.2286303509  | -0.0165100030 |
| C | 5.5249285518  | -3.0568020816 | 0.4280067175  |
| C | 3.6448320654  | -4.0911167879 | 1.4816532231  |
| C | 3.4137534998  | -5.0252435838 | 0.2902495238  |
| C | 4.0032062570  | -4.4487018900 | -0.9857762514 |
| C | 5.4368302621  | -4.0188462093 | -0.7497336066 |
| C | 1.4187166834  | -6.4237037201 | 0.2738742381  |
| C | 0.7388061421  | -6.8742746184 | -1.0165063103 |
| C | -0.4116327773 | -5.9534577571 | -1.3750333415 |
| C | -1.3657833775 | -5.8188070672 | -0.2017980639 |
| C | -0.6093478228 | -5.4512502131 | 1.0724841529  |
| C | -3.6399305517 | -4.9831972563 | -0.3316324186 |
| C | -3.9918962653 | -2.6901948922 | 0.2280942159  |
| C | -4.7554237652 | -2.4258313259 | -1.0679567326 |
| C | -4.2899629651 | -3.3843485064 | -2.1533441097 |
| C | -4.3740040432 | -4.8184311354 | -1.6583671211 |
| C | -5.6267720279 | -0.2909520183 | -1.7829411747 |

|   |               |               |               |
|---|---------------|---------------|---------------|
| C | -5.4795044353 | 0.3477276512  | -3.1596070754 |
| C | -4.3051041991 | 1.3097105993  | -3.1909033556 |
| C | -4.4585378126 | 2.3293439944  | -2.0746709027 |
| C | -4.6802210292 | 1.6299315326  | -0.7291749865 |
| C | -3.3602789662 | 4.4987065112  | -2.0307114610 |
| C | -2.6599324259 | 5.0883622652  | -3.2520817791 |
| C | -1.1794046036 | 4.7925818524  | -3.1930991673 |
| C | -0.5972901410 | 5.3186586573  | -1.8953608658 |
| C | -1.3672469032 | 4.7959571336  | -0.6813066374 |
| C | 1.7768118715  | 5.6816626340  | -1.5053934404 |
| C | 2.6219136263  | 4.0927920220  | 0.0353217243  |
| C | 3.8763673807  | 3.8483129143  | -0.8060753356 |
| C | 3.5481726615  | 4.0847004401  | -2.2757798125 |
| C | 2.9273464934  | 5.4553186720  | -2.4804210380 |
| C | 2.8077276418  | 3.9042271353  | 1.5215782405  |
| C | -0.9463527336 | 5.4831699409  | 0.6144399999  |
| C | -5.0534415691 | 2.5743610809  | 0.4117335280  |
| C | -4.5150325078 | -1.8764107947 | 1.3949095779  |
| C | -1.4752280302 | -5.5034841624 | 2.3164461215  |
| C | 3.3343364921  | -4.7629351643 | 2.8081642640  |
| C | 4.0588711554  | -0.0722499827 | 2.4291371465  |
| H | 3.6452929312  | 0.4823246362  | 0.4077067398  |
| H | 6.3763145677  | -0.7753174494 | 0.9516307490  |
| H | 4.8989513027  | 0.0016449241  | -1.6008847600 |
| H | 7.3584854287  | 1.2676764493  | -0.3484674423 |
| H | 6.0057658372  | 3.1581359929  | 0.2495828429  |
| H | 6.5714802169  | -2.8254442433 | 0.6563935490  |
| H | 3.0121824803  | -3.2021122505 | 1.3497533055  |
| H | 3.8753772946  | -5.9981360266 | 0.5038447960  |
| H | 3.4181355037  | -3.5541397143 | -1.2506328618 |
| H | 6.0268640122  | -4.9094371123 | -0.4858509366 |
| H | 2.1626488064  | -7.1597897529 | 0.5983486889  |
| H | 0.3329412124  | -7.8808918128 | -0.8376067980 |
| H | 0.0023980619  | -4.9532757569 | -1.5843728758 |
| H | -1.9004135003 | -6.7656005720 | -0.0527396190 |
| H | -0.2182781128 | -4.4339766283 | 0.9454364280  |
| H | -3.8249195654 | -5.9712575769 | 0.1029699334  |
| H | -2.9266595218 | -2.4670394369 | 0.0801277442  |
| H | -5.8301362989 | -2.5811754895 | -0.8918611527 |
| H | -3.2346169011 | -3.1544283109 | -2.3722143794 |
| H | -5.4342175272 | -5.0589792711 | -1.4872322018 |
| H | -6.5528955962 | -0.8737274758 | -1.7317662390 |
| H | -6.3960600280 | 0.9285670824  | -3.3450009174 |
| H | -3.3776032546 | 0.7427645485  | -3.0080379548 |
| H | -5.3214019201 | 2.9726270371  | -2.3036812492 |
| H | -3.7592207282 | 1.0947656917  | -0.4565113599 |
| H | -4.4096998274 | 4.8170169053  | -2.0097679572 |
| H | -2.8085283574 | 6.1787939258  | -3.2315058949 |
| H | -1.0505561497 | 3.6978790326  | -3.1967797339 |
| H | -0.6068972480 | 6.4192501757  | -1.9179892823 |
| H | -1.1735931362 | 3.7199848793  | -0.6015146792 |
| H | 1.4524384556  | 6.7290914510  | -1.5352189970 |
| H | 1.8466511182  | 3.3920705397  | -0.2997145071 |
| H | 4.6753235610  | 4.5375059839  | -0.4949760794 |
| H | 2.8026232628  | 3.3242696079  | -2.5650655272 |
| H | 3.6976632936  | 6.2111170352  | -2.2652220475 |
| H | 3.1449804044  | 5.3299937914  | -4.3822694285 |
| H | 5.1825096624  | 3.2147261593  | -2.8767633688 |

|    |               |               |               |
|----|---------------|---------------|---------------|
| H  | 3.4706532596  | 3.0530383068  | 1.7049271247  |
| H  | 3.2562321954  | 4.8126910495  | 1.9464268602  |
| H  | 0.3860932797  | 5.2884178648  | -4.2271268654 |
| H  | -2.6726830603 | 4.7981102373  | -5.1463977039 |
| H  | 0.0609963082  | 5.8916939531  | 0.4984599647  |
| H  | -1.6355564245 | 6.3155487748  | 0.7989546291  |
| H  | -0.0358535372 | 4.3038257587  | 1.8938821101  |
| H  | -3.7545867209 | 2.6826757020  | -4.4707697109 |
| H  | -5.0541735482 | -0.2031478791 | -4.9477869906 |
| H  | -5.8177089050 | 3.2893772187  | 0.0751377403  |
| H  | -5.5006753660 | 1.9659942082  | 1.2028795325  |
| H  | -3.5446673700 | 3.8579103038  | 0.3308493152  |
| H  | -5.5867747431 | -2.0904579731 | 1.5303866992  |
| H  | -4.2153887704 | -5.4565053508 | -3.4537107328 |
| H  | -5.0205275439 | -2.4297235670 | -3.6916986700 |
| H  | -1.8909293119 | -6.0840162904 | -2.6384943997 |
| H  | 1.1782482720  | -7.0393764627 | -2.8742207228 |
| H  | -0.8613495692 | -5.2041457920 | 3.1804549943  |
| H  | -2.2873524257 | -4.7794586685 | 2.2070375609  |
| H  | -1.3383927025 | -7.3997119991 | 2.5632678999  |
| H  | 2.2992643155  | -5.1182466720 | 2.8001660610  |
| H  | 3.4384403933  | -4.0197684785 | 3.6140255338  |
| H  | 5.0626032789  | -5.5703987575 | 2.9716981731  |
| H  | 5.6629871010  | -3.9566349199 | -2.6528710691 |
| H  | 3.1616798074  | -5.7783699513 | -2.1411757997 |
| H  | 6.4600119749  | -1.6763458748 | -1.9065422582 |
| H  | 7.0132855106  | 1.2954566029  | -2.6797435308 |
| H  | 4.8806625864  | 0.0421825075  | 3.1418821803  |
| H  | 3.7655067961  | -1.1293864332 | 2.4128827431  |
| H  | 2.2537679116  | 0.6268020435  | 2.3040820474  |
| H  | 1.6780861279  | 3.2707618946  | 2.9959222119  |
| H  | -3.9188369005 | -3.0523684461 | 2.7873484597  |
| H  | -4.4124928928 | -0.8147503375 | 1.1582042831  |
| Cl | 0.0764533256  | 1.2668942434  | -1.0279577546 |
| H  | -3.4734020042 | 6.0462516513  | 4.2393792878  |
| Cl | 1.1890619949  | -1.7020948224 | -0.9116938889 |
| C  | -0.0552807375 | 0.3275200165  | 0.4186774204  |
| C  | -3.9473985219 | 5.3272708753  | 3.5697255570  |
| H  | -4.9011374031 | 5.0060605423  | 3.9921159343  |
| H  | -1.0084398389 | 1.9129877849  | 1.4830155021  |
| C  | -0.6630102699 | 0.8848073357  | 1.5394805034  |
| C  | 0.4396405090  | -0.9811767585 | 0.4635226100  |
| H  | -2.1598435106 | 4.4582518475  | 2.9565068298  |
| H  | -4.1216155743 | 5.7884344430  | 2.5967146119  |
| N  | -3.0655003705 | 4.1562532718  | 3.3904638321  |
| H  | -3.4753290868 | 3.5768543100  | 2.6246015985  |
| H  | -3.0416303691 | 1.5133004117  | 2.5812652552  |
| C  | 0.7721682864  | 3.9903396471  | 5.6656646303  |
| C  | -0.8215535948 | 0.1413756064  | 2.7125919018  |
| C  | 0.3081843022  | -1.7130658729 | 1.6405428442  |
| C  | -0.5866759821 | 4.1487255424  | 5.4396483823  |
| C  | 1.3827818320  | 2.7847107465  | 5.3168516102  |
| H  | 1.3476245021  | 4.7884556257  | 6.1237646233  |
| C  | -1.3476550023 | 3.1257844574  | 4.8593026296  |
| H  | -1.0751905458 | 5.0757811574  | 5.7330200322  |
| C  | -2.8266912485 | 3.3476551740  | 4.6547329648  |
| C  | 0.6318527700  | 1.7649334866  | 4.7435162071  |
| H  | 2.4426513107  | 2.6287978956  | 5.4961107334  |

|   |               |               |              |
|---|---------------|---------------|--------------|
| C | -0.7389044238 | 1.9175190265  | 4.4968957385 |
| C | -2.9826619788 | 1.0786867004  | 3.5866704461 |
| H | 1.1306724170  | 0.8397912543  | 4.4700311165 |
| C | -0.3309619821 | -1.1632342798 | 2.7456092278 |
| C | -1.5192419372 | 0.7454760440  | 3.9164526759 |
| H | 0.7057632852  | -2.7210695270 | 1.6737231993 |
| H | -3.2027114863 | 3.9742168816  | 5.4701134701 |
| C | -3.6009945249 | 2.0374140106  | 4.5975181920 |
| H | -4.6546887475 | 2.2291748963  | 4.3596858801 |
| H | -3.5459349492 | 0.1416393537  | 3.5424286836 |
| H | -0.4475773242 | -1.7619293352 | 3.6439525251 |
| H | -1.5290536769 | -0.0249182283 | 4.6996354476 |
| H | -3.5856736888 | 1.6004024201  | 5.6024692746 |

B-CD:cis-(1S,4S)-SRT\_3\_MD E(Ha)= -5903.35272501

|   |               |               |               |
|---|---------------|---------------|---------------|
| O | 5.3318070255  | 0.8755310932  | 0.8919238316  |
| O | 4.6120317147  | -2.5958447810 | 0.0079686461  |
| O | 4.4434682607  | -4.3094407655 | 1.5593232707  |
| O | 1.4301519820  | -5.5695086285 | -0.0926922707 |
| O | -0.1697575616 | -6.6540364778 | 1.1795772581  |
| O | -2.7651888308 | -4.5694126727 | -0.3461608373 |
| O | -4.3929044963 | -3.6210433760 | 0.9910067622  |
| O | -5.5530744270 | 1.3608062100  | -0.2195701892 |
| O | -3.0024331299 | 3.3138996857  | -1.9860695009 |
| O | -2.1603628771 | 5.2664591277  | -1.0934323180 |
| O | 1.1948423216  | 4.4176997024  | -2.3360521777 |
| O | 2.8174834526  | 4.9328804628  | -0.7780268057 |
| O | 2.8848505966  | 4.7487792405  | -4.3911388627 |
| O | 4.9691120233  | 2.9559550436  | -3.6214041224 |
| O | 4.5455873752  | 1.7223830091  | -1.1134173577 |
| O | -0.2365426842 | 4.8426389637  | -4.7339405663 |
| O | -2.9779270752 | 4.4408458940  | -4.5398195181 |
| O | -0.1783552508 | 5.1147448006  | 1.3773741634  |
| O | -4.6840364146 | 2.2401854018  | -4.1194729012 |
| O | -5.9875140165 | -0.0956169978 | -3.5080546022 |
| O | -3.1388026568 | 3.7058355859  | 1.0596073633  |
| O | -4.6162367241 | -5.2766544713 | -2.2195973657 |
| O | -5.7151937497 | -2.7887587530 | -2.7854455413 |
| O | -1.8931692826 | -6.2545388762 | -2.5244297352 |
| O | 0.7864423246  | -7.0624131888 | -2.2890322619 |
| O | -2.6140932448 | -6.8547108835 | 2.5298834918  |
| O | 2.5474092364  | -3.8690302217 | 3.6246096926  |
| O | 5.6858042665  | -4.3867327796 | -1.8439879553 |
| O | 3.5243412020  | -6.0942291883 | -2.0212986384 |
| O | 6.7484778997  | -1.8188619755 | -1.8262117071 |
| O | 6.7681200214  | 0.8987406569  | -2.4288456347 |
| O | 3.1558128192  | 0.3038148244  | 2.7159148759  |
| O | 1.9816087283  | 3.5619564782  | 1.6638187289  |
| O | -5.7161263913 | -1.5629395206 | 2.2688831643  |
| O | -4.7106215586 | -0.6254738185 | -1.0776524684 |
| C | 4.5615856050  | -0.3245004624 | 0.8328067890  |
| C | 5.3978605422  | -1.4261008183 | 0.1770454239  |
| C | 5.8327034560  | -0.9573697121 | -1.2079258621 |
| C | 6.5206315376  | 0.3933401476  | -1.1355625531 |
| C | 5.6813610836  | 1.4009320945  | -0.3606374409 |
| C | 5.1280857588  | -3.8259518553 | 0.4303213899  |
| C | 3.0441648969  | -4.5264892973 | 1.3548035710  |
| C | 2.8070565133  | -5.5453674434 | 0.2429157212  |
| C | 3.5499311861  | -5.1188305917 | -1.0136752651 |
| C | 5.0081566195  | -4.8508920660 | -0.6972370198 |
| C | 0.6973659038  | -6.7461552349 | 0.0769818477  |
| C | -0.1049759793 | -6.9976179387 | -1.1946802507 |
| C | -1.1381851543 | -5.9034709537 | -1.3952153236 |
| C | -1.9871925165 | -5.7418270298 | -0.1457671736 |
| C | -1.1187904067 | -5.5834361860 | 1.0998062166  |
| C | -4.1155607228 | -4.5970906156 | 0.0174981955  |
| C | -4.1254790662 | -2.2772304902 | 0.5850695212  |
| C | -5.0247457425 | -1.9295853337 | -0.6016510028 |
| C | -4.7997259200 | -2.9227776049 | -1.7309762973 |
| C | -4.9700568693 | -4.3434104124 | -1.2202557962 |
| C | -5.7375464064 | 0.3151125760  | -1.1496182074 |

|   |               |               |               |
|---|---------------|---------------|---------------|
| C | -5.7888563046 | 0.9172959575  | -2.5495962841 |
| C | -4.5126971971 | 1.6836986707  | -2.8444872279 |
| C | -4.2868859874 | 2.7309573683  | -1.7658578680 |
| C | -4.3485565227 | 2.0984587245  | -0.3714170221 |
| C | -2.8982371540 | 4.6914157926  | -2.1613468482 |
| C | -2.2271413501 | 5.0146264088  | -3.4949867435 |
| C | -0.8063273217 | 4.4990850371  | -3.4999744101 |
| C | -0.0411161153 | 5.1017564147  | -2.3412715973 |
| C | -0.7649570526 | 4.8958754399  | -1.0072363604 |
| C | 2.3763896498  | 5.1232713190  | -2.0966366582 |
| C | 3.0605734973  | 3.5564770563  | -0.4591670435 |
| C | 4.2421314724  | 3.0903004949  | -1.3080920861 |
| C | 3.8818171091  | 3.2299395962  | -2.7822202291 |
| C | 3.4289415531  | 4.6467604030  | -3.0929802189 |
| C | 3.2585740580  | 3.4643600213  | 1.0324190204  |
| C | -0.1570965730 | 5.7447340828  | 0.1093790277  |
| C | -4.3929655713 | 3.1100034816  | 0.7717272151  |
| C | -4.3963180909 | -1.4213296664 | 1.8084556353  |
| C | -1.9106429078 | -5.6442896014 | 2.3926997420  |
| C | 2.4909492938  | -4.9365121341 | 2.7015620999  |
| C | 4.1211908767  | -0.6240584683 | 2.2523016636  |
| H | 3.6678088481  | -0.1638354871 | 0.2102335665  |
| H | 6.2832846467  | -1.6369575682 | 0.7947649938  |
| H | 4.9140997953  | -0.8443732399 | -1.8075380923 |
| H | 7.4654601838  | 0.2611098618  | -0.5866051058 |
| H | 6.2681704525  | 2.3028375813  | -0.1507394999 |
| H | 6.1744956232  | -3.7201427228 | 0.7387820039  |
| H | 2.5709577266  | -3.5836644877 | 1.0509223366  |
| H | 3.1498700858  | -6.5446778756 | 0.5497174530  |
| H | 3.0960878156  | -4.1747072120 | -1.3563203200 |
| H | 5.4654725534  | -5.7845413815 | -0.3367711337 |
| H | 1.3614721034  | -7.5921414026 | 0.2898565139  |
| H | -0.6326263625 | -7.9554839650 | -1.0746773279 |
| H | -0.6010845999 | -4.9540654365 | -1.5554716132 |
| H | -2.6348738145 | -6.6200471498 | -0.0276861973 |
| H | -0.5942354782 | -4.6199802338 | 1.0334817245  |
| H | -4.3710515128 | -5.5566065894 | 0.4804657182  |
| H | -3.0721353418 | -2.1761922284 | 0.2876403478  |
| H | -6.0699818850 | -1.9711009861 | -0.2688552870 |
| H | -3.7607226066 | -2.8031807370 | -2.0801914581 |
| H | -6.0244190140 | -4.4744349951 | -0.9335132697 |
| H | -6.6996242162 | -0.1357742657 | -0.8855188697 |
| H | -6.6287502821 | 1.6281129308  | -2.5674452648 |
| H | -3.6664725037 | 0.9785054285  | -2.8153145204 |
| H | -5.0688473170 | 3.5002315022  | -1.8554224305 |
| H | -3.4730203907 | 1.4460987768  | -0.2422334545 |
| H | -3.8858706266 | 5.1661262369  | -2.1147831557 |
| H | -2.2073087059 | 6.1102942568  | -3.5974486287 |
| H | -0.8322201269 | 3.4069003989  | -3.3576614233 |
| H | 0.1106065330  | 6.1743218033  | -2.5385368652 |
| H | -0.6885079149 | 3.8319069242  | -0.7505075429 |
| H | 2.2114104600  | 6.2020262064  | -2.2087033489 |
| H | 2.1815159087  | 2.9525544290  | -0.7204704921 |
| H | 5.1217117747  | 3.7147479206  | -1.0927141063 |
| H | 3.0351259328  | 2.5500857132  | -2.9784276314 |
| H | 4.3029330194  | 5.3070532460  | -2.9857242895 |
| H | 3.5320076693  | 4.3483798159  | -4.9860944483 |
| H | 5.4043242562  | 2.1414277536  | -3.3116129264 |

|    |               |               |               |
|----|---------------|---------------|---------------|
| H  | 3.7147827823  | 2.5023927642  | 1.2868170594  |
| H  | 3.9210397632  | 4.2775328125  | 1.3607457294  |
| H  | 0.7106361700  | 4.6224102599  | -4.7018975998 |
| H  | -2.4195016323 | 4.4934464076  | -5.3282923356 |
| H  | 0.8765108914  | 5.9956765733  | -0.1393658191 |
| H  | -0.7315704426 | 6.6756318442  | 0.1729963437  |
| H  | 0.6586954527  | 4.5985731669  | 1.4749595446  |
| H  | -3.9536269642 | 2.8559863397  | -4.3089573567 |
| H  | -5.7974095498 | 0.3093149910  | -4.3656487945 |
| H  | -5.1564890592 | 3.8738654494  | 0.5656852235  |
| H  | -4.7047365705 | 2.5699683514  | 1.6702162191  |
| H  | -2.8421139939 | 4.2465620645  | 0.3014761350  |
| H  | -4.2589783637 | -0.3692912116 | 1.5414138877  |
| H  | -5.0797147170 | -4.9869454987 | -3.0177234775 |
| H  | -5.6684881634 | -1.8810253233 | -3.1367249724 |
| H  | -2.7335633175 | -5.7615192283 | -2.5032208814 |
| H  | 0.2359089945  | -7.0485516394 | -3.0831467463 |
| H  | -1.2172157535 | -5.4812598253 | 3.2327901755  |
| H  | -2.6486377273 | -4.8369013753 | 2.4013415495  |
| H  | -1.9577289784 | -7.5592691234 | 2.4702261740  |
| H  | 3.0454243150  | -5.8146268857 | 3.0661223600  |
| H  | 1.4421655468  | -5.2245440367 | 2.5966395326  |
| H  | 3.4804036454  | -3.6395889004 | 3.7094967880  |
| H  | 5.3715234461  | -4.9331500920 | -2.5778047409 |
| H  | 2.5948258431  | -6.3043405543 | -2.2265998360 |
| H  | 6.3259650115  | -2.6872429088 | -1.9666864606 |
| H  | 7.1512103194  | 0.1605311837  | -2.9228901977 |
| H  | 4.9863535429  | -0.5332501011 | 2.9169566279  |
| H  | 3.7500590467  | -1.6550304086 | 2.3063290630  |
| H  | 2.3182799782  | 0.0793624683  | 2.2940003436  |
| H  | 2.0746025259  | 3.2641257262  | 2.5785124565  |
| H  | -5.8476628081 | -2.5072111862 | 2.4199528600  |
| H  | -3.6591600548 | -1.6794468603 | 2.5854024211  |
| Cl | -0.4003673320 | 0.8973539721  | -0.8092617016 |
| H  | -3.2662571955 | 6.4555060632  | 2.2386888332  |
| Cl | 0.5052252966  | -2.0923592300 | -0.2485112441 |
| C  | -0.3102917204 | 0.2843944576  | 0.8051123874  |
| C  | -3.0164758674 | 6.1875942972  | 3.2660418949  |
| H  | -2.5276021582 | 7.0287094941  | 3.7594337298  |
| H  | -0.9625815358 | 2.1326028840  | 1.6351041382  |
| C  | -0.6547341449 | 1.1166723696  | 1.8634828087  |
| C  | 0.1080766023  | -1.0299560204 | 1.0510237819  |
| H  | -1.2378927416 | 5.2620553016  | 2.6954089283  |
| H  | -3.9301380103 | 5.9283534625  | 3.8037976286  |
| N  | -2.1038012695 | 5.0261910071  | 3.2421740211  |
| H  | -2.5367499236 | 4.3126411048  | 2.6152578268  |
| H  | -2.6234929940 | 2.3080671174  | 3.0905340451  |
| C  | 2.0035476033  | 4.6254859366  | 5.0108297822  |
| C  | -0.6091715538 | 0.6553526225  | 3.1819345653  |
| C  | 0.1932652683  | -1.4839019901 | 2.3660955003  |
| C  | 0.6695779502  | 4.9856034062  | 4.8976928896  |
| C  | 2.3573813305  | 3.2803035436  | 4.8899817583  |
| H  | 2.7598046179  | 5.3798063853  | 5.2024013705  |
| C  | -0.3223481374 | 4.0245654303  | 4.6627515144  |
| H  | 0.3840583264  | 6.0293430181  | 5.0118370300  |
| C  | -1.7647417652 | 4.4691142005  | 4.6088660674  |
| C  | 1.3796602670  | 2.3215406295  | 4.6493380812  |
| H  | 3.3948324668  | 2.9732285756  | 4.9823488495  |

|   |               |               |              |
|---|---------------|---------------|--------------|
| C | 0.0274613569  | 2.6747471537  | 4.5312368678 |
| C | -2.4392376118 | 2.0953921658  | 4.1495578846 |
| H | 1.6788415324  | 1.2836707978  | 4.5326595961 |
| C | -0.1720625123 | -0.6481490321 | 3.4178284575 |
| C | -1.0040824307 | 1.5721356453  | 4.3256007783 |
| H | 0.5687353510  | -2.4812041534 | 2.5723374161 |
| H | -1.8926241429 | 5.3121610977  | 5.2962896197 |
| C | -2.7180760444 | 3.3417328751  | 4.9812715778 |
| H | -3.7606237370 | 3.6611750277  | 4.8641041154 |
| H | -3.1433583562 | 1.3004602847  | 4.4130555898 |
| H | -0.1048032859 | -1.0253420245 | 4.4344038359 |
| H | -0.9826503486 | 0.9685874300  | 5.2435433163 |
| H | -2.5778203971 | 3.1312037625  | 6.0474245463 |



B-CD:cis-(1S,4S)-SRT\_4\_MD E(Ha)= -5903.3524660022

|    |             |             |             |
|----|-------------|-------------|-------------|
| Cl | -0.95099698 | 1.92929050  | -0.42729351 |
| Cl | 0.33955233  | -0.93489265 | -0.86645567 |
| O  | -0.78244235 | -4.65350078 | -2.09927964 |
| O  | 0.76138496  | -4.80027486 | 1.62432664  |
| O  | -2.80862306 | 3.59507667  | 3.65339302  |
| O  | 2.05994736  | 7.07236421  | 2.29024631  |
| O  | -1.58453510 | 6.86396364  | -2.32997926 |
| O  | 1.12726153  | 6.26187424  | -2.66551751 |
| O  | 5.24937420  | 3.26654777  | -3.04095565 |
| O  | 3.94222182  | 5.63607154  | -2.44385395 |
| O  | 5.67774100  | 2.22049952  | 2.03356374  |
| O  | 3.64462956  | -3.30644256 | 1.11193511  |
| O  | 5.66048750  | 0.60180130  | -3.79181490 |
| O  | 4.60628806  | -1.90468543 | -4.23789841 |
| O  | 0.63927083  | -5.14094546 | -4.48643404 |
| O  | 3.33641061  | -4.43032193 | -4.39690632 |
| O  | -1.65274246 | -3.63712454 | 1.88121912  |
| O  | -2.43701853 | -5.23970815 | -4.12801144 |
| O  | -4.68096127 | -3.62898636 | -3.41365741 |
| O  | -3.08151431 | -0.64332164 | 2.77720487  |
| O  | -6.58988965 | -1.63590614 | -2.35182627 |
| O  | -6.82752718 | 1.09091941  | -1.80247484 |
| O  | -1.99342847 | 5.35573775  | -0.05822497 |
| O  | -4.16755334 | 5.68108558  | -1.96588130 |
| O  | -6.14374133 | 3.77778524  | -1.75218187 |
| O  | -4.84285554 | 3.81346482  | 1.63185819  |
| O  | -4.83951406 | 2.09706249  | 0.07607206  |
| O  | -5.25379968 | -1.41228918 | 1.00098070  |
| O  | -4.35386436 | -2.25908993 | -0.95452706 |
| O  | -2.33778817 | -5.27916505 | -0.51217700 |
| O  | 2.65832112  | -5.03981806 | -0.87918862 |
| O  | 3.26668412  | -3.09757442 | -1.95920038 |
| O  | 5.71101223  | -0.81283287 | -0.45783590 |
| O  | 4.57906262  | 1.04488122  | -1.26140418 |
| O  | 4.03677335  | 4.01792431  | 0.79426629  |
| O  | 2.25684512  | 4.74711775  | -0.47628986 |
| O  | -0.45834172 | 6.63045105  | 1.10566073  |
| N  | 2.76467697  | -4.55529664 | 3.39375369  |
| C  | 3.25362203  | -2.65187168 | 4.93256599  |
| C  | 1.28535625  | -1.18523071 | 4.25669268  |
| C  | 0.12026304  | 0.84118192  | 3.26889439  |
| C  | 2.76075156  | -1.54051975 | 4.01408676  |
| C  | 0.41793901  | -2.38781172 | 4.60856967  |
| C  | -0.96293026 | -2.20426614 | 4.77234189  |
| C  | 2.43632634  | -3.92045911 | 4.73231236  |
| C  | 0.95282756  | -3.66052613 | 4.84403026  |
| C  | -1.79050903 | -3.25515039 | 5.15161607  |
| C  | 0.11166310  | -4.71453996 | 5.22478116  |
| C  | -0.41080146 | 1.54860564  | 2.19426552  |
| C  | 0.71087945  | -0.40916536 | 3.08593476  |
| C  | -1.25293400 | -4.52306745 | 5.37685661  |
| C  | -0.33802303 | 1.02278582  | 0.90524579  |
| C  | 0.74505564  | -0.94932672 | 1.79698672  |
| C  | 3.68368312  | -5.70911658 | 3.47368650  |
| C  | 0.24082630  | -0.23910251 | 0.71303421  |
| C  | 1.42764678  | 5.81633710  | 2.25414015  |

|   |             |             |             |
|---|-------------|-------------|-------------|
| C | 4.37796094  | 1.86306155  | 1.64184860  |
| C | 4.81409313  | -2.62573614 | 0.68781940  |
| C | 0.72404422  | -5.55515201 | 0.42397502  |
| C | -2.92365876 | -3.78790346 | 1.24829810  |
| C | -4.13548300 | 0.19135754  | 2.32573191  |
| C | -2.94481887 | 4.66190234  | 2.73780477  |
| C | -5.49348124 | 4.29777877  | -0.61376276 |
| C | -4.07674655 | 4.71237698  | -0.95731133 |
| C | -3.36016480 | 5.21266441  | 0.28591992  |
| C | -3.48001493 | 4.18187854  | 1.40601415  |
| C | -5.48480065 | 3.26169064  | 0.50940118  |
| C | -4.57082088 | -0.16154127 | 0.91614871  |
| C | -5.49730986 | 0.85110987  | 0.23856136  |
| C | -5.85395510 | 0.32582682  | -1.15053350 |
| C | -6.42194885 | -1.08018913 | -1.06675981 |
| C | -5.52921840 | -1.99915091 | -0.24238477 |
| C | -2.71559995 | -3.92432598 | -0.24040546 |
| C | -3.93813247 | -3.60240940 | -1.09965065 |
| C | -3.57213270 | -3.76550126 | -2.57032354 |
| C | -2.98237825 | -5.14154471 | -2.83081102 |
| C | -1.88236677 | -5.46959050 | -1.82631059 |
| C | 2.66451453  | -4.99545682 | -3.29515713 |
| C | 1.19716746  | -4.63382236 | -3.30603315 |
| C | 0.51853979  | -5.20058987 | -2.07544958 |
| C | 1.23813537  | -4.78664987 | -0.78905812 |
| C | 3.31493226  | -4.48794582 | -2.00990231 |
| C | 4.58045155  | -1.67310338 | -0.48208429 |
| C | 4.48175749  | -2.35905015 | -1.84833228 |
| C | 4.48503915  | -1.32922100 | -2.96626179 |
| C | 5.67888114  | -0.40564773 | -2.80775875 |
| C | 5.69196187  | 0.22141571  | -1.41799006 |
| C | 4.43374249  | 4.76242261  | -1.44954076 |
| C | 4.38874813  | 3.32500629  | -1.93552470 |
| C | 4.78341634  | 2.37992408  | -0.81191852 |
| C | 3.92114206  | 2.64281683  | 0.42157442  |
| C | 3.60987567  | 4.93900772  | -0.17881545 |
| C | -1.37603823 | 6.60399915  | 0.04066122  |
| C | -0.65145596 | 6.89032684  | -1.26929223 |
| C | 0.45829702  | 5.87893366  | -1.49334740 |
| C | 1.36952771  | 5.83759080  | -0.28019287 |
| C | 0.57437984  | 5.64334736  | 1.01053797  |
| H | 3.15441638  | -2.35614244 | 5.98308132  |
| H | 1.24488238  | -0.52225218 | 5.13233983  |
| H | 0.05841976  | 1.27671007  | 4.26239438  |
| H | 3.37037995  | -0.64178375 | 4.14862630  |
| H | 4.31915476  | -2.85113663 | 4.76505702  |
| H | 2.71578009  | -4.67038786 | 5.47958875  |
| H | -0.90383467 | 2.49948228  | 2.36773454  |
| H | -1.40597526 | -1.22925092 | 4.58749023  |
| H | -2.85508483 | -3.07835787 | 5.27514733  |
| H | 0.54127423  | -5.69486115 | 5.42155818  |
| H | -1.89063626 | -5.34674167 | 5.68166597  |
| H | 2.90032142  | -1.83672520 | 2.96777878  |
| H | 3.18270934  | -3.87463691 | 2.72209076  |
| H | 3.92284628  | -6.03779230 | 2.46126083  |
| H | 1.88890944  | -4.82391989 | 2.87702302  |
| H | 1.16553028  | -1.93374349 | 1.61417915  |
| H | 4.60187467  | -5.41163172 | 3.98360943  |

|   |             |             |             |
|---|-------------|-------------|-------------|
| H | 3.20627959  | -6.52221607 | 4.02241932  |
| H | -0.30651219 | -5.87195156 | 0.24311766  |
| H | -0.13179881 | -4.40255925 | 1.75543820  |
| H | -3.69699211 | 3.25516448  | 3.80842057  |
| H | 1.35970889  | 7.73416263  | 2.25099756  |
| H | 0.79393213  | 5.65315726  | 3.13964400  |
| H | 2.21633189  | 5.05796866  | 2.25555350  |
| H | -1.06314524 | 6.86207779  | -3.14341143 |
| H | 2.02557509  | 5.88431073  | -2.65308387 |
| H | 5.25834716  | 2.35749197  | -3.39099945 |
| H | 4.38785862  | 5.37014771  | -3.26010814 |
| H | 5.67115005  | 3.18053285  | 2.13182455  |
| H | 3.64640240  | 2.02252477  | 2.45072203  |
| H | 4.39378356  | 0.79682964  | 1.39710097  |
| H | 3.32307759  | -3.90386582 | 0.40772050  |
| H | 5.15724648  | -2.02135082 | 1.53220967  |
| H | 5.61930910  | -3.33279324 | 0.44088339  |
| H | 5.45128814  | 0.16114682  | -4.62609600 |
| H | 3.99697364  | -2.66027608 | -4.31446379 |
| H | -0.32323661 | -5.00215361 | -4.45121300 |
| H | 2.78285717  | -4.61388001 | -5.16851686 |
| H | 1.34572188  | -6.44955602 | 0.54845349  |
| H | -1.78546210 | -3.20382199 | 2.73351348  |
| H | -3.44250071 | -4.68002966 | 1.62554283  |
| H | -3.53336383 | -2.90220497 | 1.45209367  |
| H | -3.11727540 | -4.91641930 | -4.73218208 |
| H | -5.18387616 | -2.83955023 | -3.14355300 |
| H | -2.27756014 | -0.35330698 | 2.33096524  |
| H | -4.97638455 | 0.03006285  | 3.00775455  |
| H | -3.85271237 | 1.25043971  | 2.36745571  |
| H | -7.02623162 | -0.95088580 | -2.87614374 |
| H | -6.50320850 | 2.00574081  | -1.90636402 |
| H | -3.60631873 | 5.44941404  | 3.12911631  |
| H | -1.95267515 | 5.09847512  | 2.59430554  |
| H | -3.26752171 | 5.98257046  | -2.19105600 |
| H | -5.88766439 | 4.35378589  | -2.48596845 |
| H | -6.03705471 | 5.17764480  | -0.23745227 |
| H | -3.53670422 | 3.81717865  | -1.30734559 |
| H | -3.78930983 | 6.17780891  | 0.59422119  |
| H | -2.91267912 | 3.29424093  | 1.09753875  |
| H | -6.50920016 | 3.03857252  | 0.82980218  |
| H | -3.67184206 | -0.27382942 | 0.29068245  |
| H | -6.41252593 | 0.97171064  | 0.83688938  |
| H | -4.91471812 | 0.28562905  | -1.72830315 |
| H | -7.39033939 | -1.01579478 | -0.54686000 |
| H | -6.05457350 | -2.93534962 | -0.01896686 |
| H | -1.90153727 | -3.24492354 | -0.52637042 |
| H | -4.75939151 | -4.29046857 | -0.84954292 |
| H | -2.79780018 | -3.01181590 | -2.79511370 |
| H | -3.78564476 | -5.88077359 | -2.68981376 |
| H | -1.60471421 | -6.52842609 | -1.89999807 |
| H | 2.76258654  | -6.09180477 | -3.30922602 |
| H | 1.11251327  | -3.53597969 | -3.25819550 |
| H | 0.48116027  | -6.29767573 | -2.16239205 |
| H | 1.06986089  | -3.71272522 | -0.64249489 |
| H | 4.34988977  | -4.84605468 | -1.94630240 |
| H | 3.65571885  | -1.10587129 | -0.30284030 |
| H | 5.34329869  | -3.03009633 | -1.98616579 |

|   |             |             |             |
|---|-------------|-------------|-------------|
| H | 3.56452852  | -0.72924989 | -2.87583849 |
| H | 6.59344318  | -1.01082985 | -2.90185668 |
| H | 6.61915150  | 0.78122287  | -1.25536216 |
| H | 5.47926684  | 5.00907491  | -1.20980625 |
| H | 3.34928728  | 3.08958897  | -2.21912190 |
| H | 5.83627063  | 2.53339761  | -0.54067893 |
| H | 2.87409617  | 2.39915561  | 0.19272778  |
| H | 3.77164494  | 5.92868632  | 0.26262324  |
| H | -2.11135207 | 7.38815904  | 0.25679774  |
| H | -0.19754045 | 7.88917319  | -1.18824628 |
| H | -0.00027850 | 4.88241363  | -1.60353757 |
| H | 1.92787636  | 6.78062708  | -0.21591255 |
| H | 0.13185258  | 4.63736754  | 1.00132651  |

255

2-HP-B-CD:cis-(1S,4S)-SRT\_1\_Ci E(Ha)= -7253.89474094

|    |               |               |               |
|----|---------------|---------------|---------------|
| Cl | -5.2672714305 | -2.9789535023 | 6.3327795704  |
| Cl | -3.2220799798 | -0.5740278919 | 6.8497550889  |
| O  | 1.1939478474  | -5.5598907006 | -3.2423391128 |
| O  | 3.4306786619  | -4.0257831486 | -0.8080760633 |
| O  | 5.7099669179  | -3.8025961848 | -1.2189248026 |
| O  | 5.4429402992  | -0.2378786478 | -0.4625837768 |
| O  | 6.5783409037  | 1.4336704688  | -1.5792743430 |
| O  | 3.8678219977  | 3.7970824714  | -0.8780538253 |
| O  | 3.4423176488  | 5.4926940082  | -2.4081703733 |
| O  | -0.1680169630 | 5.1361817601  | -1.9329508886 |
| O  | -1.6788949654 | 5.3593096883  | -3.6692745948 |
| O  | -3.6735532232 | 2.6568497781  | -2.2514935176 |
| O  | -5.2920495896 | 1.4774932442  | -3.4164415052 |
| O  | -3.7546853103 | -1.6710008943 | -2.3442522402 |
| O  | -3.6189997669 | -3.5075340243 | -3.7514602810 |
| O  | -4.7998106751 | -3.2564834882 | -0.3159496336 |
| O  | -2.4477061682 | -4.7311194721 | 0.0579706171  |
| O  | -0.5638150314 | -4.6231664220 | -2.0732089061 |
| O  | -4.5712344162 | -0.5363514911 | 0.1531250584  |
| O  | -5.1093219735 | 2.1968767758  | 0.1592160626  |
| O  | -6.3165281193 | -0.8754668573 | -4.6579854970 |
| O  | -3.9047244074 | 4.6530871051  | -0.2423189435 |
| O  | -1.7725584295 | 6.5657248466  | -0.2663300838 |
| O  | -3.6985700118 | 4.6879289401  | -5.3803390115 |
| O  | 3.4204056472  | 5.4518734316  | 1.2065309840  |
| O  | 0.6976738260  | 6.0835584898  | 0.6297526821  |
| O  | 4.6834971634  | 3.1202082111  | 1.7347018645  |
| O  | 6.2262425636  | 0.7820749861  | 1.9874699204  |
| O  | 6.9300649834  | 3.8595829188  | -2.8638022786 |
| O  | 8.0550640910  | -2.2803898868 | -1.7477733758 |
| O  | 3.9245045237  | -4.0621276622 | 1.9672542088  |
| O  | 4.7015198948  | -1.3844025277 | 2.0296601032  |
| O  | 2.0863607446  | -5.9201820804 | 0.7886143782  |
| O  | -0.4884692094 | -6.6683806965 | -0.2168806783 |
| O  | 3.8029045538  | -5.9264425032 | -3.9894192489 |
| O  | -2.2630946827 | -5.6884743928 | -4.9778004069 |
| O  | 1.9311467706  | 6.9661901426  | -4.2518985062 |
| O  | 4.6063831017  | -6.7720154641 | 1.7177222354  |
| O  | -3.2786590378 | -7.3326780221 | -0.4650980904 |
| O  | -7.1300469786 | -1.5744738029 | 0.1215602222  |
| O  | -6.7104450056 | 4.4352149094  | -0.3899317432 |
| O  | -0.5213864860 | 8.7219370097  | 1.0031340095  |
| O  | 5.5344728453  | 5.5449529931  | 3.1103783305  |
| O  | 7.2380366950  | -1.6764393202 | 3.2201454871  |
| N  | 2.3034565057  | -0.5103096586 | 3.0446411395  |
| C  | 2.7103761018  | 0.7279256440  | 3.7558532111  |
| C  | -3.2747199803 | -2.7161863940 | 2.8779464082  |
| C  | -4.1517940116 | -3.1091037333 | 3.8803320575  |
| C  | -4.1576497534 | -2.4644790982 | 5.1154097292  |
| C  | -3.2646740666 | -1.4125940935 | 5.3384893910  |
| C  | -2.3860279782 | -1.0230330244 | 4.3307222719  |
| C  | -2.3808936430 | -1.6644177428 | 3.0935656634  |
| C  | -0.9915659514 | 0.1588103303  | 1.9681704951  |
| C  | 0.3370984319  | 0.6093619238  | 1.8810323278  |
| C  | 0.5975761297  | 1.9840162059  | 1.7729588056  |
| C  | -0.4320521576 | 2.9129970273  | 1.7719970574  |

|   |               |               |               |
|---|---------------|---------------|---------------|
| C | -1.7518770825 | 2.4636943892  | 1.8221196403  |
| C | -2.0240056497 | 1.1047849742  | 1.9084484449  |
| C | -1.3589041218 | -1.3136748749 | 2.0266411719  |
| C | -0.1342482224 | -2.2236435051 | 2.1848115803  |
| C | 1.0408568408  | -1.7503515322 | 1.3405918692  |
| C | 1.4905303532  | -0.3557603946 | 1.7611958628  |
| C | 2.1704383140  | -4.6394125848 | -2.7565141376 |
| C | 2.6874611219  | -5.0888259127 | -1.3923344852 |
| C | 1.5607170792  | -5.4251992790 | -0.4212658566 |
| C | 0.6159037184  | -6.4226543586 | -1.0592219028 |
| C | 0.1226414385  | -5.8168380222 | -2.3805016226 |
| C | 4.7261101011  | -4.2833608846 | -0.3386384042 |
| C | 5.6476225506  | -2.4054693466 | -1.4869235148 |
| C | 5.7118531409  | -1.6017179734 | -0.1861855620 |
| C | 4.6562816552  | -2.0925408987 | 0.7892220391  |
| C | 4.8605417047  | -3.5804308661 | 1.0178540330  |
| C | 6.5155245621  | 0.6812435228  | -0.4101923155 |
| C | 6.2831245814  | 1.5773912837  | 0.8133325316  |
| C | 4.9784188153  | 2.3260945816  | 0.6121975809  |
| C | 5.1060486722  | 3.1415560413  | -0.6703427741 |
| C | 5.4315155038  | 2.2439343008  | -1.8633809193 |
| C | 3.8697501430  | 5.1882281296  | -1.1140143787 |
| C | 2.1062265959  | 5.0913552542  | -2.7280399552 |
| C | 1.1154457002  | 5.7109059653  | -1.7418406805 |
| C | 1.5206168920  | 5.4212767476  | -0.3006353110 |
| C | 2.9608882937  | 5.8405729588  | -0.0719458787 |
| C | -1.2029888925 | 5.9200081760  | -2.4803730051 |
| C | -2.3237933759 | 6.0122292981  | -1.4387085983 |
| C | -2.8687398948 | 4.6194324616  | -1.1976060326 |
| C | -3.3415759821 | 4.0110005063  | -2.5106697426 |
| C | -2.2366620358 | 4.0462062295  | -3.5650191716 |
| C | -5.0177570567 | 2.2545200254  | -2.2789170772 |
| C | -5.2848636319 | 1.4295277388  | -1.0178085364 |
| C | -4.3601225336 | 0.2212716928  | -1.0222906842 |
| C | -4.6603849034 | -0.5766935444 | -2.2866801747 |
| C | -4.5062691563 | 0.2922449705  | -3.5361699652 |
| C | -4.2813355678 | -2.9417947988 | -2.6549428609 |
| C | -2.2173641215 | -3.7109303189 | -3.5742884644 |
| C | -1.9592482400 | -4.5617081131 | -2.3302884916 |
| C | -2.6337997033 | -3.9533890652 | -1.1059284186 |
| C | -4.1170184534 | -3.8275520714 | -1.4132001745 |
| C | -1.7282087947 | -4.3942816246 | -4.8396836669 |
| C | -4.9934644175 | -0.4145654780 | -4.7888236924 |
| C | -2.7665915665 | 3.7280675571  | -4.9540708803 |
| C | 1.8620979993  | 5.5658585773  | -4.1504005988 |
| C | 5.8057915848  | 3.0486113602  | -3.0975680197 |
| C | 6.8214730867  | -2.0847818137 | -2.3962000142 |
| C | 3.2700015779  | -4.6409030206 | -3.8073086070 |
| C | -6.1311541141 | -3.7563088405 | -0.1471457826 |
| C | -6.2883137630 | 2.4519848776  | 0.9297674410  |
| C | -2.5501120494 | 7.5513002618  | 0.4081291590  |
| C | 3.5075804505  | 6.4888109096  | 2.1843548078  |
| C | 7.4852613636  | 0.6679440398  | 2.6646838725  |
| C | 4.4735172465  | -4.7850349581 | 3.0769188128  |
| C | -0.9708606303 | -8.0122316760 | -0.2668428726 |
| C | 4.2009325164  | -6.2857278924 | 2.9827369151  |
| C | 7.4035983340  | -0.3816183398 | 3.7616569507  |
| C | 4.2157643134  | 5.9405702639  | 3.4141602221  |

|   |               |               |               |
|---|---------------|---------------|---------------|
| C | -1.7013547746 | 8.1518981881  | 1.5205759740  |
| C | -6.6540225146 | 3.9355061895  | 0.9322265246  |
| C | -6.9335479324 | -2.8229908934 | 0.7471728044  |
| C | -2.3737620224 | -8.0827890133 | 0.3163495858  |
| C | 4.9544641652  | -7.0257168522 | 4.0731069551  |
| C | -2.8585063847 | -9.5206354391 | 0.3486686245  |
| C | -8.2959345337 | -3.4227947708 | 1.0439682239  |
| C | -8.0023375721 | 4.1421304906  | 1.5967867007  |
| C | -2.4717817729 | 9.2426307498  | 2.2396076795  |
| C | 4.2882273943  | 7.0010029294  | 4.4969012199  |
| C | 8.6802808181  | -0.3838197202 | 4.5821682635  |
| H | 1.8228537878  | 1.2966703312  | 4.0286279067  |
| H | 3.3561151048  | 1.3311424986  | 3.1129916837  |
| H | 3.2626013799  | 0.4381666582  | 4.6512153395  |
| H | -3.2879589545 | -3.2427263116 | 1.9263506298  |
| H | -4.8452178501 | -3.9269579689 | 3.7152070670  |
| H | -1.7163433201 | -0.1913105514 | 4.5254920564  |
| H | 1.6244253401  | 2.3291649192  | 1.6692490535  |
| H | -0.2040596583 | 3.9730325396  | 1.7028751523  |
| H | -2.5696238996 | 3.1763884008  | 1.7668670955  |
| H | -3.0532820612 | 0.7551465395  | 1.9024516901  |
| H | -1.8200244190 | -1.5526129921 | 1.0577028413  |
| H | 0.1382982914  | -2.2698891053 | 3.2508382778  |
| H | -0.4082707642 | -3.2481347567 | 1.9154552609  |
| H | 1.8713158310  | -2.4623459444 | 1.4011010819  |
| H | 0.7442060686  | -1.6999961799 | 0.2866969461  |
| H | 2.2201258083  | 0.0466630547  | 1.0499313583  |
| H | 3.1801242263  | -1.0221642914 | 2.7665460936  |
| H | 1.7728970421  | -1.1040364711 | 3.6851080761  |
| H | 1.7306816189  | -3.6366273899 | -2.6620960489 |
| H | 3.3258968395  | -5.9701029127 | -1.5381021887 |
| H | 0.9931874306  | -4.5022025456 | -0.2328987352 |
| H | 1.1556497329  | -7.3576829066 | -1.2635965762 |
| H | -0.5353561264 | -6.5057973079 | -2.9211878080 |
| H | 4.9147692375  | -5.3540895123 | -0.2279411110 |
| H | 4.7070959015  | -2.1562552969 | -1.9997550209 |
| H | 6.7086381933  | -1.7202119421 | 0.2590993765  |
| H | 3.6723443349  | -1.9399264727 | 0.3305349433  |
| H | 5.8803752068  | -3.7536365517 | 1.3820132271  |
| H | 7.4688447364  | 0.1442828821  | -0.3465628041 |
| H | 7.1027868866  | 2.3018208787  | 0.9053981759  |
| H | 4.1750110776  | 1.5869525042  | 0.4632874729  |
| H | 5.9153823489  | 3.8765764908  | -0.5602371321 |
| H | 4.5630009009  | 1.6060869915  | -2.0777416265 |
| H | 4.8880886684  | 5.5836360836  | -1.0349934593 |
| H | 2.0203169381  | 3.9967343473  | -2.6776303447 |
| H | 1.0828915297  | 6.7954229506  | -1.9101933367 |
| H | 1.4514973781  | 4.3318234702  | -0.1533768799 |
| H | 3.0414734006  | 6.9303077620  | -0.1832237736 |
| H | -0.8322261591 | 6.9166618040  | -2.7417427914 |
| H | -3.1129543575 | 6.6679775180  | -1.8308856163 |
| H | -2.0400826180 | 4.0007491899  | -0.8222747943 |
| H | -4.2123194116 | 4.5584080457  | -2.8970749391 |
| H | -1.4551915200 | 3.3277788198  | -3.2811429117 |
| H | -5.6967175183 | 3.1117607078  | -2.3192379645 |
| H | -6.3228425799 | 1.0781349975  | -1.0713082940 |
| H | -3.3187228338 | 0.5710464473  | -1.0502220115 |
| H | -5.6927411172 | -0.9456014217 | -2.2298349415 |

|   |               |                |               |
|---|---------------|----------------|---------------|
| H | -3.4440058169 | 0.5522719875   | -3.6532241401 |
| H | -5.3310728115 | -2.8553107836  | -2.9562294207 |
| H | -1.7080104873 | -2.7439723757  | -3.4556639945 |
| H | -2.3604697595 | -5.5710537388  | -2.4892748654 |
| H | -2.2241431820 | -2.9447950650  | -0.9445870731 |
| H | -4.5197153576 | -4.8280437716  | -1.6245231527 |
| H | -1.9718979415 | -3.7541149159  | -5.6996204697 |
| H | -0.6410523446 | -4.5030362342  | -4.7909274607 |
| H | -4.8803027110 | 0.2701443174   | -5.6417331446 |
| H | -4.3664428650 | -1.2922559480  | -4.9698165050 |
| H | -1.9184768595 | 3.6421384771   | -5.6499122935 |
| H | -3.2861783982 | 2.7658739700   | -4.9231798376 |
| H | 2.5808295297  | 5.0691282477   | -4.8186276878 |
| H | 0.8535189940  | 5.2714095496   | -4.4539946683 |
| H | 5.9681366413  | 2.3532860618   | -3.9339858981 |
| H | 4.9773352756  | 3.7127016134   | -3.3584970315 |
| H | 6.7719259796  | -1.0298109405  | -2.6822526356 |
| H | 6.7352556011  | -2.6909402198  | -3.3087964215 |
| H | 4.0891091937  | -3.9992678791  | -3.4701888019 |
| H | 2.8676875543  | -4.2251510771  | -4.7429308499 |
| H | -6.0745098712 | -4.7657135647  | 0.2830598308  |
| H | -6.6356840719 | -3.8151291825  | -1.1209752642 |
| H | -6.1030202580 | 2.1022364255   | 1.9521504333  |
| H | -7.1242409530 | 1.8725080963   | 0.5212491189  |
| H | -3.4622386307 | 7.0920232626   | 0.8088041098  |
| H | -2.8272184567 | 8.3440172672   | -0.3012369313 |
| H | 2.5009662354  | 6.8458139816   | 2.4310292280  |
| H | 4.0984102112  | 7.3222618999   | 1.7794502105  |
| H | 7.7391404424  | 1.6486592661   | 3.0868242078  |
| H | 8.2691799763  | 0.3703980480   | 1.9555772998  |
| H | 4.0236327164  | -4.3769483137  | 3.9898966098  |
| H | 5.5550157523  | -4.6109709729  | 3.1264719662  |
| H | -0.2808443707 | -8.6598751689  | 0.2913425418  |
| H | -1.0152970312 | -8.3574706997  | -1.3092676415 |
| H | 3.1212050883  | -6.4500040379  | 3.1131490588  |
| H | 6.5532911938  | -0.1204234430  | 4.4142237626  |
| H | 3.6295125501  | 5.0824319098   | 3.7867022592  |
| H | -1.4604495472 | 7.3460990535   | 2.2347993235  |
| H | -5.8840258313 | 4.4805340481   | 1.4998496182  |
| H | -6.3787256931 | -2.6969105881  | 1.6916817135  |
| H | -2.3326192177 | -7.6879697896  | 1.3446784080  |
| H | 4.6943449113  | -6.6522507875  | 5.0687088924  |
| H | 6.0334325332  | -6.9130424476  | 3.9289125122  |
| H | 4.7182119565  | -8.0909019087  | 4.0313702480  |
| H | -2.2028236305 | -10.1550054890 | 0.9519941953  |
| H | -2.9043404304 | -9.9263946906  | -0.6667928114 |
| H | -3.8649608836 | -9.5576567128  | 0.7703523376  |
| H | -8.2108862211 | -4.3823099754  | 1.5622252887  |
| H | -8.8566063739 | -3.5736311104  | 0.1160279965  |
| H | -8.8660399252 | -2.7351887154  | 1.6719217651  |
| H | -8.0188182138 | 3.7253522650   | 2.6087073552  |
| H | -8.7880809434 | 3.6587448828   | 1.0080549295  |
| H | -8.2319785591 | 5.2081263064   | 1.6554075476  |
| H | -3.3989075405 | 8.8582770160   | 2.6744834050  |
| H | -2.7180366839 | 10.0504293256  | 1.5436429875  |
| H | -1.8570612946 | 9.6630646474   | 3.0382246023  |
| H | 3.2919326395  | 7.3419556736   | 4.7923884011  |
| H | 4.8637121972  | 7.8623294045   | 4.1442098367  |



|   |               |               |               |
|---|---------------|---------------|---------------|
| H | 4.7957499087  | 6.5958517807  | 5.3747667855  |
| H | 8.8541657294  | 0.5840230561  | 5.0600934123  |
| H | 9.5384202240  | -0.6231041175 | 3.9468256591  |
| H | 8.6127012931  | -1.1502429610 | 5.3567457610  |
| H | -1.5888886154 | -5.1956627790 | -0.0126497480 |
| H | -4.3801923936 | -1.4737857119 | -0.0495275024 |
| H | -6.8721384065 | -0.0975025916 | -4.5289900921 |
| H | -4.1559718839 | 3.7216616529  | -0.0655254796 |
| H | -3.2346529338 | 5.5338981346  | -5.3831303694 |
| H | -0.2276887923 | 6.0246246017  | 0.3072404570  |
| H | 4.0836363629  | 3.8431529385  | 1.4417296538  |
| H | 7.6677521063  | 3.2659239592  | -2.6816506604 |
| H | 8.1276324456  | -3.2235632128 | -1.5595119664 |
| H | 5.1985175645  | -0.5346385442 | 1.8924271071  |
| H | 2.5763837510  | -5.1794101853 | 1.1924193081  |
| H | 3.0717454201  | -6.4847995274 | -4.2799845879 |
| H | -3.2200416437 | -5.5907418973 | -5.0488039346 |
| H | 2.8307174952  | 7.2201336875  | -4.0147662332 |
| H | 3.8011920056  | -6.8582902080 | 1.1870547700  |
| H | -3.1802572636 | -6.4011215802 | -0.2068225352 |
| H | -6.3102524208 | -1.0628591935 | 0.2373702917  |
| H | -5.8329371435 | 4.8011859113  | -0.5758511534 |
| H | 0.0881739543  | 7.9993468251  | 0.7973801087  |
| H | 5.4960873776  | 4.7015734931  | 2.6388401823  |
| H | 6.3074140635  | -1.7810845800 | 2.9769252071  |

2-HP-B-CD:cis-(1S,4S)-SRT\_2\_Cl E(Ha)= -7253.88256506  
Cl -3.0144868461 15.1637795360 2.5189849790  
Cl -1.6131340963 13.1462855486 4.5643988688  
O -3.7427851497 -6.7409691115 1.7297194834  
O -4.6150247931 -3.3738761605 0.5662461000  
O -5.3348206610 -1.8808146890 2.1733305540  
O -4.0766386168 0.9454467249 0.2253229967  
O -3.4622215383 2.8407936842 1.4012613924  
O -0.3712102597 3.0253272240 -0.5413661648  
O 1.3797503188 4.2252674018 0.3766341643  
O 3.6393517324 1.4537433882 -0.4202801000  
O 5.3394317787 0.9543433453 1.0679181635  
O 4.9427653104 -2.6363486277 0.4662208958  
O 5.1530249194 -4.1490253674 2.2019565422  
O 2.5434834966 -6.2893899253 0.7865318714  
O 1.2891187063 -7.6174515204 2.2132419123  
O 2.4279237342 -8.1765258498 -1.1745153610  
O -0.4473845092 -8.1155553712 -1.5040872405  
O -1.7885980476 -6.6563814607 0.4898709879  
O 4.5807061966 -6.4853071101 -1.1631321138  
O 6.3733383946 -4.2258394163 -1.1961933357  
O 4.4616841552 -6.1403084123 3.9453323295  
O 5.9495431036 -1.6864769381 -2.0471430602  
O 5.2626050068 1.0658884539 -2.5410286225  
O 6.7723880419 -0.6227379512 2.8744396287  
O 0.4510513393 3.8163503142 -3.1175626859  
O 2.9123356678 2.3920594696 -3.0192647044  
O -2.3271603881 3.5698354974 -2.4977534879  
O -4.9218885329 2.5349754298 -1.9283342342  
O -1.9496789818 4.6561152574 2.5194349560  
O -5.2837900653 0.4445305072 3.6404227457  
O -6.7285904472 -2.7871268550 -1.0627465591  
O -6.1887848279 0.0017403328 -1.3832175493  
O -4.7952311665 -4.8859902196 -1.8079533901  
O -3.2010001252 -7.2555513895 -1.8344859647  
O -5.8733021872 -5.5062568927 3.1358956988  
O -0.8765502587 -8.4801809966 3.6099210317  
O 3.8049350981 4.6769810445 1.4896744348  
O -7.4679631364 -5.5632432528 -1.3862868910  
O -2.5563024787 -9.9604362976 -1.3583538389  
O 4.9769212040 -9.2992261815 -1.6913479827  
O 8.5497559726 -2.9586880570 -2.4066316791  
O 5.3701226405 3.2291052958 -4.3433903311  
O -1.1555341390 6.1014972672 -2.7602916705  
O -7.4453730244 2.4109822056 -0.7431806854  
N -0.4692298313 6.9339881290 2.8758686004  
C 0.5028487021 6.6543785027 3.9588815023  
C -1.7876822528 12.1812441561 0.1645207132  
C -2.3476521990 13.3662150494 0.6251935825  
C -2.3112767798 13.6861059672 1.9800539247  
C -1.6974122221 12.8010971418 2.8745993735  
C -1.1386069504 11.6179094713 2.4027865606  
C -1.1782856712 11.2900450547 1.0478237365  
C 0.7414873934 9.6194908917 1.0983191391  
C 1.1025354480 8.3187942506 1.4892739409  
C 2.4314250515 8.0420599646 1.8438536805  
C 3.3934637951 9.0413442686 1.8511155799

|   |               |               |               |
|---|---------------|---------------|---------------|
| C | 3.0334593859  | 10.3367313288 | 1.4858119304  |
| C | 1.7272646513  | 10.6132926250 | 1.1069517172  |
| C | -0.6409614346 | 9.9594919830  | 0.5605973458  |
| C | -1.6704823424 | 8.8502667466  | 0.8164877214  |
| C | -1.0864705409 | 7.4653831102  | 0.5624990790  |
| C | 0.0984629105  | 7.1952622322  | 1.4815814846  |
| C | -3.8430389330 | -5.3202762857 | 1.8143718719  |
| C | -4.6075050280 | -4.7975322422 | 0.6005889250  |
| C | -3.9834251160 | -5.2570363829 | -0.7123610890 |
| C | -3.8479653135 | -6.7704132529 | -0.6782667762 |
| C | -3.0796292216 | -7.1948820802 | 0.5753330446  |
| C | -5.7295178106 | -2.7292386903 | 1.1220151864  |
| C | -4.3993004044 | -0.8697862216 | 1.8062767116  |
| C | -5.0272186894 | 0.0049711746  | 0.7254466665  |
| C | -5.5019944699 | -0.8179559935 | -0.4647388948 |
| C | -6.4217654500 | -1.9297683122 | 0.0103916394  |
| C | -4.3167681143 | 2.3039669798  | 0.4006283101  |
| C | -4.0605199757 | 3.0214689138  | -0.9310144860 |
| C | -2.6062934868 | 2.8368914043  | -1.3280196200 |
| C | -1.7131247442 | 3.3255910023  | -0.1932906596 |
| C | -2.0711400969 | 2.6825408103  | 1.1432856061  |
| C | 0.5171274450  | 4.0879711507  | -0.7333396207 |
| C | 2.2097904820  | 3.0766314221  | 0.6279604848  |
| C | 3.0073627578  | 2.7019185371  | -0.6241058757 |
| C | 2.1307104005  | 2.5738288736  | -1.8713769421 |
| C | 1.3206056532  | 3.8495518113  | -2.0092316882 |
| C | 5.0345624035  | 1.4258016360  | -0.2120791704 |
| C | 5.6671214232  | 0.5498793481  | -1.2931747988 |
| C | 5.2528541960  | -0.9004390955 | -1.1139640378 |
| C | 5.5232670703  | -1.3503446626 | 0.3181605287  |
| C | 4.9135555131  | -0.3881167422 | 1.3380724810  |
| C | 5.7212922803  | -3.6740446009 | 1.0145365484  |
| C | 5.8370655894  | -4.7937121752 | -0.0246806912 |
| C | 4.4721588019  | -5.4118849280 | -0.2622691383 |
| C | 3.8693651748  | -5.8628018121 | 1.0631463071  |
| C | 3.8492189658  | -4.7270168532 | 2.0836405736  |
| C | 2.1651444368  | -7.5983586630 | 1.1190421253  |
| C | 0.0608412095  | -6.9121146147 | 2.0259229468  |
| C | -0.6744920127 | -7.4743763590 | 0.8117259147  |
| C | 0.2157323779  | -7.4953431519 | -0.4244826099 |
| C | 1.5057383860  | -8.2309893906 | -0.1118236637 |
| C | -0.7028612466 | -7.1162067611 | 3.3241085545  |
| C | 3.5106423805  | -5.2145702439 | 3.4832837863  |
| C | 5.3730365666  | -0.6835658271 | 2.7546666696  |
| C | 3.0940451266  | 3.4952775147  | 1.7880562056  |
| C | -1.3931509967 | 3.3563599627  | 2.3236750821  |
| C | -4.1165238850 | -0.1142182994 | 3.0937493946  |
| C | -4.5463728290 | -5.0347874370 | 3.1293149904  |
| C | 2.5789371750  | -9.3566653833 | -1.9587958621 |
| C | 7.3541853977  | -4.9944690295 | -1.8877821464 |
| C | 6.2699918530  | 1.1280412257  | -3.5497392875 |
| C | 0.5445677668  | 4.9141425531  | -4.0247639570 |
| C | -5.9642888172 | 3.4104163763  | -2.3579605789 |
| C | -8.0768184553 | -3.2487728097 | -1.0759277299 |
| C | -3.8640258184 | -8.3083666502 | -2.5327851011 |
| C | -8.1848096586 | -4.4879436568 | -1.9504272993 |
| C | -7.3374437199 | 2.7986889174  | -2.0996670831 |
| C | -0.7457419450 | 5.7266262072  | -4.0703990092 |

|   |               |                |               |
|---|---------------|----------------|---------------|
| C | 5.7177134953  | 1.9164874478   | -4.7282682658 |
| C | 7.9725124517  | -4.1164629152  | -2.9665916664 |
| C | 3.9379411036  | -9.3104900789  | -2.6443717443 |
| C | -2.9812070125 | -9.5451335539  | -2.6426224158 |
| C | -9.6363204237 | -4.9118698745  | -2.0869413169 |
| C | -3.7434380729 | -10.6806067132 | -3.3021974082 |
| C | 4.1279173709  | -10.5312625180 | -3.5253449262 |
| C | 9.0621211016  | -4.8737637670  | -3.7010042939 |
| C | 6.7530643489  | 2.0133377453   | -5.8327737953 |
| C | -0.5530151767 | 6.9760336665   | -4.9076133838 |
| C | -8.4332723582 | 3.7971275722   | -2.4252461385 |
| H | 1.1461535832  | 7.5200853563   | 4.1073937446  |
| H | 1.1071208173  | 5.7925359271   | 3.6739310197  |
| H | -0.0502154631 | 6.4299094953   | 4.8717882437  |
| H | -1.8267979806 | 11.9528575990  | -0.8972030836 |
| H | -2.8179435333 | 14.0595924409  | -0.0636150693 |
| H | -0.6476478592 | 10.9607703057  | 3.1143365895  |
| H | 2.7229492734  | 7.0255621175   | 2.1012648025  |
| H | 4.4172913125  | 8.8087707310   | 2.1257446028  |
| H | 3.7755370817  | 11.1291292472  | 1.4814785304  |
| H | 1.4570227216  | 11.6212518079  | 0.8056375484  |
| H | -0.5257008468 | 10.0355324330  | -0.5306837354 |
| H | -2.0491557198 | 8.9446731544   | 1.8461074478  |
| H | -2.5439382749 | 9.0154684446   | 0.1793277788  |
| H | -1.8461501878 | 6.6863587377   | 0.7015585654  |
| H | -0.7498464611 | 7.3846566500   | -0.4781242970 |
| H | 0.5916665780  | 6.2509030414   | 1.2261147460  |
| H | -1.1114807787 | 6.1093881128   | 2.7859300553  |
| H | -1.0384753895 | 7.7406722594   | 3.1396554136  |
| H | -2.8399305227 | -4.8699873074  | 1.8284532735  |
| H | -5.6380849457 | -5.1737614436  | 0.6372087871  |
| H | -2.9842663481 | -4.8096039027  | -0.8131393050 |
| H | -4.8567295757 | -7.1983407327  | -0.6056933902 |
| H | -3.0512916238 | -8.2875066176  | 0.6358371327  |
| H | -6.4110343365 | -3.4569237694  | 1.5750296715  |
| H | -3.4748523134 | -1.3254387122  | 1.4246096052  |
| H | -5.8783777370 | 0.5366913238   | 1.1709319050  |
| H | -4.6235312464 | -1.2747340896  | -0.9433739733 |
| H | -7.3346059770 | -1.4735465699  | 0.4190663770  |
| H | -5.3401060378 | 2.4973328345   | 0.7355581878  |
| H | -4.2430027023 | 4.0932852855   | -0.7679981816 |
| H | -2.4187776078 | 1.7669926342   | -1.4916753055 |
| H | -1.8404471794 | 4.4141072222   | -0.1029543171 |
| H | -1.7984528724 | 1.6189122520   | 1.1158971056  |
| H | -0.0204231423 | 5.0365060515   | -0.8304063172 |
| H | 1.5842840876  | 2.2212349621   | 0.9141118154  |
| H | 3.7596452981  | 3.4798103025   | -0.8184271215 |
| H | 1.4414376726  | 1.7271632695   | -1.7326586292 |
| H | 2.0222251975  | 4.6882411998   | -2.1137003291 |
| H | 5.4435455166  | 2.4411573310   | -0.2648087809 |
| H | 6.7590580980  | 0.6231718969   | -1.1906681987 |
| H | 4.1678416011  | -0.9688523948  | -1.2899103799 |
| H | 6.6074931795  | -1.3966417725  | 0.4846158550  |
| H | 3.8180188057  | -0.4523171822  | 1.2782202509  |
| H | 6.7147721498  | -3.3017822940  | 1.2856442634  |
| H | 6.5207432122  | -5.5578849142  | 0.3712835183  |
| H | 3.8197478377  | -4.6299668759  | -0.6813804558 |
| H | 4.4599102012  | -6.6917793305  | 1.4754224059  |

|   |                |                |               |
|---|----------------|----------------|---------------|
| H | 3.1268881139   | -3.9654123293  | 1.7583386126  |
| H | 3.0371127881   | -8.1868072151  | 1.4239468145  |
| H | 0.2600393357   | -5.8432703386  | 1.8632766919  |
| H | -1.0046666165  | -8.4943292321  | 1.0523332969  |
| H | 0.4677478855   | -6.4573511483  | -0.6858280075 |
| H | 1.2742619826   | -9.2770970238  | 0.1326165261  |
| H | -0.1668953676  | -6.5941082472  | 4.1320747941  |
| H | -1.7004917880  | -6.6798849671  | 3.2326088830  |
| H | 3.4287304200   | -4.3438605596  | 4.1520069929  |
| H | 2.5448416415   | -5.7271452162  | 3.4650905753  |
| H | 4.8726546669   | 0.0167391276   | 3.4412674079  |
| H | 5.0709632038   | -1.6998261503  | 3.0224950679  |
| H | 2.4612060983   | 3.6243074228   | 2.6823574916  |
| H | 3.8210981193   | 2.7061979962   | 2.0019088045  |
| H | -1.5286652986  | 2.7548806281   | 3.2303707996  |
| H | -0.3269113743  | 3.4832296200   | 2.1239023146  |
| H | -3.4334574360  | 0.7144930870   | 2.8890896088  |
| H | -3.6248932695  | -0.8034112489  | 3.7967700201  |
| H | -4.5888870552  | -3.9545833543  | 3.2937943607  |
| H | -3.9536538393  | -5.4814694150  | 3.9413041546  |
| H | 1.7586647831   | -9.4230704296  | -2.6845772141 |
| H | 2.5514436108   | -10.2388989483 | -1.3044344943 |
| H | 6.8903180418   | -5.8893504749  | -2.3196946107 |
| H | 8.1392428733   | -5.3011340606  | -1.1815110113 |
| H | 6.5601490220   | 0.1136287295   | -3.8466362287 |
| H | 7.1494829842   | 1.6543389643   | -3.1521207187 |
| H | 0.7757969079   | 4.5143186371   | -5.0186777839 |
| H | 1.3711563195   | 5.5704516614   | -3.7258756700 |
| H | -5.8227269194  | 3.6137709069   | -3.4261921696 |
| H | -5.8958018520  | 4.3619901746   | -1.8152997747 |
| H | -8.7288864414  | -2.4463181627  | -1.4495958520 |
| H | -8.3987792878  | -3.5212593390  | -0.0607071098 |
| H | -4.1404764322  | -7.9420185994  | -3.5293765588 |
| H | -4.7846760044  | -8.5834008333  | -2.0035271870 |
| H | -7.7850136204  | -4.2343443795  | -2.9456748865 |
| H | -7.4492353363  | 1.9157543643   | -2.7462956928 |
| H | -1.5314519549  | 5.1051129256   | -4.5238072773 |
| H | 4.8327014313   | 1.3798273457   | -5.1097040291 |
| H | 7.1759713877   | -3.8448739485  | -3.6798572166 |
| H | 3.9748005523   | -8.4030491513  | -3.2699077549 |
| H | -2.1055331531  | -9.2928256901  | -3.2604149135 |
| H | -10.2475323176 | -4.1240809858  | -2.5370494906 |
| H | -10.0514418113 | -5.1620058640  | -1.1053350255 |
| H | -9.6994294516  | -5.8041571010  | -2.7133332074 |
| H | -4.1148451341  | -10.3957714232 | -4.2915997304 |
| H | -4.5957850959  | -10.9727239989 | -2.6805923047 |
| H | -3.0937389700  | -11.5515510419 | -3.4122624731 |
| H | 3.3498387036   | -10.5991709045 | -4.2911710015 |
| H | 4.1043714602   | -11.4414210536 | -2.9179011688 |
| H | 5.1014003192   | -10.4816329118 | -4.0176548650 |
| H | 8.6726987128   | -5.7836504804  | -4.1666224979 |
| H | 9.8621168757   | -5.1485214690  | -3.0065474528 |
| H | 9.4939050181   | -4.2387854546  | -4.4775782967 |
| H | 7.0579340583   | 1.0231951401   | -6.1833540189 |
| H | 7.6391037652   | 2.5474872589   | -5.4757079558 |
| H | 6.3400815674   | 2.5715256001   | -6.6756103232 |
| H | -0.2014926208  | 6.7295032069   | -5.9139089516 |
| H | 0.1828612467   | 7.6371776024   | -4.4383549910 |

|   |               |               |               |
|---|---------------|---------------|---------------|
| H | -1.4950217153 | 7.5217711600  | -4.9954679553 |
| H | -8.3646750286 | 4.1464123570  | -3.4602441964 |
| H | -8.3652770802 | 4.6631609862  | -1.7589565342 |
| H | -9.4124489058 | 3.3364644639  | -2.2793223320 |
| H | -1.2587435314 | -7.5967727783 | -1.6733835480 |
| H | 3.6894197588  | -6.8812145826 | -1.2441025116 |
| H | 5.3135021696  | -5.6877137721 | 3.9176967961  |
| H | 5.8054949658  | -2.6254075589 | -1.8125320106 |
| H | 7.0352376515  | 0.2653993561  | 2.6054820084  |
| H | 3.5547009623  | 1.6786688974  | -2.8311065294 |
| H | -1.4126398502 | 3.3530416562  | -2.7643024635 |
| H | -2.9109389980 | 4.5364605817  | 2.4688333385  |
| H | -5.8947446152 | -0.2903632423 | 3.7770477541  |
| H | -5.5594007706 | 0.6794869893  | -1.6917605907 |
| H | -5.1047054387 | -3.9786376581 | -1.6425516124 |
| H | -5.8300999965 | -6.4546348465 | 2.9625707835  |
| H | 0.0087512494  | -8.8619954394 | 3.6499329098  |
| H | 3.2121014953  | 5.2146371205  | 0.9494455666  |
| H | -6.5308707843 | -5.4538921530 | -1.6253050866 |
| H | -1.6790571702 | -9.5686714270 | -1.2270184877 |
| H | 5.0526546095  | -8.4007822483 | -1.3400497744 |
| H | 7.8281271796  | -2.3563926493 | -2.1745121661 |
| H | 4.5329390548  | 3.1843859574  | -3.8603232513 |
| H | -1.7696478050 | 5.4021159737  | -2.4821594367 |
| H | -7.2261135911 | 1.4650528035  | -0.7281885858 |

255

2-HP-B-CD:cis-(1S,4S)-SRT\_3\_Ci E(Ha)= -7253.87702866

|    |             |             |             |
|----|-------------|-------------|-------------|
| Cl | -1.39311379 | 1.44889153  | -4.39426726 |
| Cl | -0.06528581 | -0.65581520 | -2.38046644 |
| O  | -5.47723452 | 1.68415580  | -1.38544290 |
| O  | -4.58739446 | -1.14012482 | 0.76825685  |
| O  | -4.33261464 | -3.14504367 | -0.35170308 |
| O  | -1.28236064 | -3.95206943 | 1.47581131  |
| O  | 0.00349087  | -5.58346338 | 0.46473277  |
| O  | 3.01353744  | -3.55822488 | 0.91777527  |
| O  | 4.57785189  | -3.55116678 | -0.77955079 |
| O  | 5.09442751  | 0.03693940  | -0.26829631 |
| O  | 5.59266335  | 1.35360714  | -2.10620641 |
| O  | 3.47845994  | 4.08118122  | -0.88237484 |
| O  | 2.45873276  | 5.45198713  | -2.44716987 |
| O  | -0.64852882 | 5.49381774  | -0.51878186 |
| O  | -2.61691837 | 5.95319086  | -1.64980394 |
| O  | -1.66290268 | 6.66459824  | 1.79180477  |
| O  | -3.79843504 | 4.81242094  | 2.14353248  |
| O  | -4.22440202 | 3.07966035  | -0.04331498 |
| O  | 1.11444698  | 6.83379339  | 1.21075749  |
| O  | 3.89768115  | 6.16879712  | 0.79277183  |
| O  | 0.46937797  | 6.62973127  | -3.87938823 |
| O  | 5.50926141  | 3.98015368  | 1.09103878  |
| O  | 6.81719613  | 1.42603965  | 1.29503376  |
| O  | 5.27908000  | 3.32638607  | -3.98950150 |
| O  | 4.97367723  | -3.60431368 | 2.82748464  |
| O  | 6.09547945  | -1.05660147 | 2.15958051  |
| O  | 2.32136270  | -4.18805589 | 3.60031559  |
| O  | -0.43777208 | -4.76469200 | 3.98870125  |
| O  | 1.92793275  | -6.68619600 | -0.99942010 |
| O  | -3.02196783 | -5.03913768 | -1.66616660 |
| O  | -5.54735128 | -2.43670869 | 3.01685959  |
| O  | -3.18477680 | -3.98120720 | 3.51757573  |
| O  | -6.22784268 | 0.37151335  | 2.43923373  |
| O  | -6.20322231 | 3.18660217  | 1.84576715  |
| O  | -6.11668311 | -0.73050108 | -2.54971368 |
| O  | -5.11111012 | 5.20630504  | -2.76884671 |
| O  | 6.13547715  | -2.46316831 | -2.76446895 |
| O  | -8.07295138 | -1.69058339 | 2.06501612  |
| O  | -6.24093599 | 6.08998326  | 1.84149295  |
| O  | -0.51459998 | 9.12933985  | 1.10448508  |
| O  | 6.63747496  | 6.63215440  | 1.32529453  |
| O  | 8.84133563  | -0.17818143 | 2.43499228  |
| O  | 4.27224937  | -6.16943017 | 3.87318998  |
| O  | -2.48790947 | -6.65479340 | 4.03603942  |
| N  | -2.05758486 | -7.17411829 | -3.09515545 |
| C  | -1.19151397 | -7.80666427 | -2.06697635 |
| C  | -1.82461258 | -2.03951704 | -6.29356047 |
| C  | -1.86268915 | -0.68910632 | -5.97172486 |
| C  | -1.32911754 | -0.23393445 | -4.76727987 |
| C  | -0.74657771 | -1.15527630 | -3.89165314 |
| C  | -0.70891803 | -2.50631262 | -4.22536866 |
| C  | -1.25165977 | -2.96946224 | -5.42312197 |
| C  | -0.09812545 | -5.24250162 | -5.25705275 |
| C  | -0.21503791 | -6.53080615 | -4.70408991 |
| C  | 0.94189870  | -7.25955837 | -4.39483297 |
| C  | 2.20548841  | -6.71863629 | -4.57758256 |

|   |             |             |             |
|---|-------------|-------------|-------------|
| C | 2.32472955  | -5.43880582 | -5.11364591 |
| C | 1.18614990  | -4.72254055 | -5.45861491 |
| C | -1.29869821 | -4.45099332 | -5.75063764 |
| C | -2.63245412 | -5.05007759 | -5.28032148 |
| C | -2.63207377 | -6.56805301 | -5.41686419 |
| C | -1.55879837 | -7.19752230 | -4.53859364 |
| C | -4.73239137 | 0.52713752  | -1.00954335 |
| C | -5.37501711 | -0.07805329 | 0.23580011  |
| C | -5.51250206 | 0.93810214  | 1.36480369  |
| C | -6.22718858 | 2.17905016  | 0.86276769  |
| C | -5.52134800 | 2.68775308  | -0.40199125 |
| C | -5.05112806 | -2.44559845 | 0.65731644  |
| C | -2.92643527 | -3.17451553 | -0.12553357 |
| C | -2.66485569 | -3.92575846 | 1.17336503  |
| C | -3.38073664 | -3.24518245 | 2.33597051  |
| C | -4.86301963 | -3.14234402 | 2.01512363  |
| C | -0.68025179 | -5.20269107 | 1.64022815  |
| C | 0.27383060  | -5.13481746 | 2.83188538  |
| C | 1.40703157  | -4.16792206 | 2.53537870  |
| C | 2.08269838  | -4.57527348 | 1.22607014  |
| C | 1.07052007  | -4.70254582 | 0.08835000  |
| C | 4.32547945  | -3.91014751 | 0.55048764  |
| C | 4.45328468  | -2.14932475 | -1.05452049 |
| C | 5.36720484  | -1.34722125 | -0.12840184 |
| C | 5.15610833  | -1.70014471 | 1.34287268  |
| C | 5.28311309  | -3.20260378 | 1.51180010  |
| C | 6.05617437  | 0.85912896  | -0.88026258 |
| C | 6.39249015  | 2.00204954  | 0.08282072  |
| C | 5.17721144  | 2.89247751  | 0.26650236  |
| C | 4.68261557  | 3.35967823  | -1.09721917 |
| C | 4.42804659  | 2.18286331  | -2.03662365 |
| C | 3.37404877  | 5.38548789  | -1.38785658 |
| C | 2.95220017  | 6.31100338  | -0.24031552 |
| C | 1.55040263  | 5.94496661  | 0.20883680  |
| C | 0.60378515  | 5.97204827  | -0.98381502 |
| C | 1.11189481  | 5.09556837  | -2.12598113 |
| C | -1.76648554 | 6.33451115  | -0.59725011 |
| C | -3.09461972 | 4.61207838  | -1.55341678 |
| C | -3.86226135 | 4.44004829  | -0.24521113 |
| C | -3.02644605 | 4.84791920  | 0.96150966  |
| C | -2.50983806 | 6.25958529  | 0.74016336  |
| C | -3.96290704 | 4.39333732  | -2.77992543 |
| C | 0.33509246  | 5.31201547  | -3.41515507 |
| C | 4.17706902  | 2.62794729  | -3.46794139 |
| C | 4.83101836  | -2.00219886 | -2.51844280 |
| C | 1.63750730  | -5.31631536 | -1.17928288 |
| C | -2.33835206 | -3.82346503 | -1.35896046 |
| C | -4.79377444 | -0.38683501 | -2.22068984 |
| C | -2.02806167 | 7.85652319  | 2.48579814  |
| C | 4.33786107  | 7.36650041  | 1.42604046  |
| C | 7.96239224  | 2.01091726  | 1.91018691  |
| C | 5.92808005  | -4.47621739 | 3.43039717  |
| C | -0.49012291 | -5.72979375 | 5.03879576  |
| C | -6.73024725 | -3.04651702 | 3.53085336  |
| C | -7.39361816 | 3.97012646  | 1.89859434  |
| C | -7.92184854 | -2.10421592 | 3.40858603  |
| C | -1.91632015 | -6.22762327 | 5.26208558  |
| C | 5.24523136  | -5.34291128 | 4.47752557  |



|   |             |             |             |
|---|-------------|-------------|-------------|
| C | 8.46295248  | 1.06090270  | 2.98959785  |
| C | 5.61538094  | 7.05882420  | 2.19558592  |
| C | -0.89468245 | 8.87659428  | 2.44203203  |
| C | -7.11568099 | 5.28955427  | 2.60295774  |
| C | -9.19473376 | -2.79448116 | 3.86501201  |
| C | -8.40711484 | 6.06360258  | 2.80159466  |
| C | -1.33180299 | 10.18143743 | 3.08319415  |
| C | 6.10901306  | 8.29771269  | 2.92002013  |
| C | 9.67487478  | 1.64767714  | 3.68966263  |
| C | 6.26111100  | -6.23046675 | 5.17388633  |
| C | -1.92803935 | -7.38196905 | 6.24696059  |
| H | -0.20876223 | -7.33532684 | -2.06783081 |
| H | -1.09319830 | -8.87114191 | -2.28561922 |
| H | -1.66407786 | -7.65991463 | -1.09549598 |
| H | -2.24533727 | -2.36880659 | -7.24010906 |
| H | -2.30379113 | 0.02936076  | -6.65435354 |
| H | -0.22333781 | -3.19454347 | -3.54136696 |
| H | 0.85144637  | -8.27569743 | -4.01931385 |
| H | 3.08651042  | -7.29570980 | -4.31781987 |
| H | 3.30618181  | -5.00550898 | -5.28202193 |
| H | 1.28907041  | -3.73597929 | -5.90161337 |
| H | -1.28284411 | -4.53461892 | -6.84807320 |
| H | -2.82285741 | -4.75421928 | -4.24009713 |
| H | -3.44992896 | -4.61875135 | -5.86567287 |
| H | -3.61954180 | -6.98870516 | -5.18609187 |
| H | -2.41543065 | -6.85176327 | -6.45297928 |
| H | -1.45906948 | -8.26597667 | -4.76102194 |
| H | -2.95396444 | -7.66630159 | -3.09539495 |
| H | -2.30506245 | -6.21306493 | -2.76249523 |
| H | -3.68963685 | 0.79901257  | -0.79551733 |
| H | -6.36847751 | -0.45372347 | -0.04329207 |
| H | -4.50371675 | 1.23090848  | 1.69089733  |
| H | -7.26269121 | 1.90912379  | 0.60998927  |
| H | -6.06696764 | 3.52248663  | -0.85513726 |
| H | -6.10390616 | -2.47588883 | 0.36007120  |
| H | -2.52667039 | -2.15478660 | -0.04312015 |
| H | -3.04803338 | -4.95132269 | 1.06656365  |
| H | -2.97721593 | -2.22820674 | 2.44747690  |
| H | -5.26524987 | -4.16137712 | 1.92465937  |
| H | -1.42697241 | -5.98117941 | 1.82874306  |
| H | 0.70239111  | -6.13835429 | 2.95914878  |
| H | 0.98577264  | -3.15932215 | 2.40800090  |
| H | 2.59815294  | -5.53530982 | 1.37597191  |
| H | 0.67827779  | -3.69886701 | -0.12765671 |
| H | 4.46019802  | -4.99662620 | 0.60603713  |
| H | 3.41436530  | -1.82726132 | -0.89898889 |
| H | 6.41046230  | -1.56061300 | -0.39908436 |
| H | 4.13349384  | -1.40245606 | 1.62246155  |
| H | 6.31124039  | -3.49237174 | 1.25738329  |
| H | 6.95848141  | 0.28308352  | -1.11233607 |
| H | 7.20724521  | 2.59231895  | -0.35981289 |
| H | 4.38256371  | 2.28934364  | 0.73272244  |
| H | 5.43943837  | 4.01059339  | -1.55563039 |
| H | 3.57236608  | 1.60207329  | -1.66393067 |
| H | 4.33287961  | 5.71432932  | -1.80280730 |
| H | 2.95681227  | 7.34371070  | -0.61698717 |
| H | 1.58047845  | 4.91791307  | 0.60203849  |
| H | 0.50626472  | 6.99997486  | -1.35973426 |

|   |              |             |             |
|---|--------------|-------------|-------------|
| H | 1.06107133   | 4.04030288  | -1.82172515 |
| H | -1.47058297  | 7.36988672  | -0.79596718 |
| H | -2.25119448  | 3.90622402  | -1.56900405 |
| H | -4.76378471  | 5.06628356  | -0.27251413 |
| H | -2.16769313  | 4.16668671  | 1.05068581  |
| H | -3.37300426  | 6.93484631  | 0.67153359  |
| H | -3.34680957  | 4.57107133  | -3.67466600 |
| H | -4.30533948  | 3.35491421  | -2.80245950 |
| H | 0.67685522   | 4.57682383  | -4.16089045 |
| H | -0.72912303  | 5.14603085  | -3.22639896 |
| H | 3.92967136   | 1.74209849  | -4.07359177 |
| H | 3.32320950   | 3.31069009  | -3.49021451 |
| H | 4.08545933   | -2.54071409 | -3.12639850 |
| H | 4.80195115   | -0.94491432 | -2.79637753 |
| H | 0.90597331   | -5.17927969 | -1.99410809 |
| H | 2.55743304   | -4.79807342 | -1.46651559 |
| H | -1.29175327  | -4.07687001 | -1.18413716 |
| H | -2.40867447  | -3.13036857 | -2.20514151 |
| H | -4.26884261  | -1.31962583 | -1.99956143 |
| H | -4.27963581  | 0.11370918  | -3.05557990 |
| H | -2.27832685  | 7.59406918  | 3.52120716  |
| H | -2.91728041  | 8.29925421  | 2.02044880  |
| H | 3.55010673   | 7.74677047  | 2.08821299  |
| H | 4.56235590   | 8.12478541  | 0.66231543  |
| H | 7.69990745   | 2.99099353  | 2.32677269  |
| H | 8.75487358   | 2.13947257  | 1.15899087  |
| H | 6.73639815   | -3.87812254 | 3.87175553  |
| H | 6.35687840   | -5.14398058 | 2.67007417  |
| H | -0.09785327  | -5.26188250 | 5.94891494  |
| H | 0.15640561   | -6.58090160 | 4.79175429  |
| H | -6.55413600  | -3.32147852 | 4.57828763  |
| H | -6.95188553  | -3.96226984 | 2.96739010  |
| H | -8.17425625  | 3.40089614  | 2.42335263  |
| H | -7.74665537  | 4.19778403  | 0.88247650  |
| H | -7.73577525  | -1.22894666 | 4.04947268  |
| H | -2.51087970  | -5.39756842 | 5.67216564  |
| H | 4.77670685   | -4.67772569 | 5.22082081  |
| H | 7.65130305   | 0.92500430  | 3.72412087  |
| H | 5.38360058   | 6.27478045  | 2.93637489  |
| H | -0.03977582  | 8.46751618  | 3.00305348  |
| H | -6.67588540  | 5.05986281  | 3.58739584  |
| H | -9.10835542  | -3.16168005 | 4.89247138  |
| H | -9.42112612  | -3.64130822 | 3.20895493  |
| H | -10.03399339 | -2.09745312 | 3.81517113  |
| H | -9.12560453  | 5.50346206  | 3.40719720  |
| H | -8.86510175  | 6.29270178  | 1.83386876  |
| H | -8.19121598  | 7.01031517  | 3.30138462  |
| H | -1.67134001  | 10.03018917 | 4.11269061  |
| H | -2.14945850  | 10.62727584 | 2.50786764  |
| H | -0.50060690  | 10.88996423 | 3.09096373  |
| H | 5.36142129   | 8.67663243  | 3.62302259  |
| H | 6.34712508   | 9.08674168  | 2.19965660  |
| H | 7.02122439   | 8.06123346  | 3.47206899  |
| H | 9.44493148   | 2.61350319  | 4.14884462  |
| H | 10.49388231  | 1.78345706  | 2.97622783  |
| H | 10.01748147  | 0.96198400  | 4.46768769  |
| H | 7.04167369   | -5.64162597 | 5.66443604  |
| H | 6.73259931   | -6.90554002 | 4.45231477  |

|   |             |             |             |
|---|-------------|-------------|-------------|
| H | 5.75949402  | -6.84204315 | 5.92697136  |
| H | -1.45466216 | -7.10459536 | 7.19398491  |
| H | -1.39151057 | -8.23986511 | 5.82909596  |
| H | -2.95530843 | -7.69180923 | 6.45091587  |
| H | -4.34618811 | 4.00835968  | 2.10904935  |
| H | 0.22488425  | 6.53831564  | 1.48906508  |
| H | 1.41651955  | 6.78487454  | -3.97613095 |
| H | 4.74316004  | 4.58740886  | 1.09039912  |
| H | 6.03695690  | 2.73565357  | -3.90632781 |
| H | 6.09100122  | -0.10890158 | 1.91764301  |
| H | 3.12061348  | -3.69883684 | 3.32184840  |
| H | 1.30749489  | -6.99763010 | -0.32719969 |
| H | -3.96439964 | -4.82806583 | -1.57890387 |
| H | -2.22651750 | -3.96847866 | 3.70473756  |
| H | -5.73294482 | -0.41638319 | 2.72780947  |
| H | -6.58679039 | 0.10268845  | -2.67580749 |
| H | -4.80391159 | 6.11937613  | -2.72166024 |
| H | 6.17536084  | -3.36060521 | -2.41328340 |
| H | -7.62246640 | -0.83301308 | 2.00348627  |
| H | -5.33373679 | 5.78254121  | 2.01200570  |
| H | 0.20889956  | 8.51531760  | 0.90856919  |
| H | 6.45479841  | 5.71564964  | 1.07431106  |
| H | 8.03523843  | -0.68012129 | 2.24944156  |
| H | 3.45639773  | -5.64739912 | 3.81911124  |
| H | -3.00077645 | -5.89996507 | 3.71036694  |

2-HP-B-CD:cis-(1S,4S)-SRT\_4\_Cl E(Ha)= -7253.8770286598

|    |             |             |             |
|----|-------------|-------------|-------------|
| Cl | -1.39311379 | 1.44889153  | -4.39426726 |
| Cl | -0.06528581 | -0.65581520 | -2.38046644 |
| O  | -5.47723452 | 1.68415580  | -1.38544290 |
| O  | -4.58739446 | -1.14012482 | 0.76825685  |
| O  | -4.33261464 | -3.14504367 | -0.35170308 |
| O  | -1.28236064 | -3.95206943 | 1.47581131  |
| O  | 0.00349087  | -5.58346338 | 0.46473277  |
| O  | 3.01353744  | -3.55822488 | 0.91777527  |
| O  | 4.57785189  | -3.55116678 | -0.77955079 |
| O  | 5.09442751  | 0.03693940  | -0.26829631 |
| O  | 5.59266335  | 1.35360714  | -2.10620641 |
| O  | 3.47845994  | 4.08118122  | -0.88237484 |
| O  | 2.45873276  | 5.45198713  | -2.44716987 |
| O  | -0.64852882 | 5.49381774  | -0.51878186 |
| O  | -2.61691837 | 5.95319086  | -1.64980394 |
| O  | -1.66290268 | 6.66459824  | 1.79180477  |
| O  | -3.79843504 | 4.81242094  | 2.14353248  |
| O  | -4.22440202 | 3.07966035  | -0.04331498 |
| O  | 1.11444698  | 6.83379339  | 1.21075749  |
| O  | 3.89768115  | 6.16879712  | 0.79277183  |
| O  | 0.46937797  | 6.62973127  | -3.87938823 |
| O  | 5.50926141  | 3.98015368  | 1.09103878  |
| O  | 6.81719613  | 1.42603965  | 1.29503376  |
| O  | 5.27908000  | 3.32638607  | -3.98950150 |
| O  | 4.97367723  | -3.60431368 | 2.82748464  |
| O  | 6.09547945  | -1.05660147 | 2.15958051  |
| O  | 2.32136270  | -4.18805589 | 3.60031559  |
| O  | -0.43777208 | -4.76469200 | 3.98870125  |
| O  | 1.92793275  | -6.68619600 | -0.99942010 |
| O  | -3.02196783 | -5.03913768 | -1.66616660 |
| O  | -5.54735128 | -2.43670869 | 3.01685959  |
| O  | -3.18477680 | -3.98120720 | 3.51757573  |
| O  | -6.22784268 | 0.37151335  | 2.43923373  |
| O  | -6.20322231 | 3.18660217  | 1.84576715  |
| O  | -6.11668311 | -0.73050108 | -2.54971368 |
| O  | -5.11111012 | 5.20630504  | -2.76884671 |
| O  | 6.13547715  | -2.46316831 | -2.76446895 |
| O  | -8.07295138 | -1.69058339 | 2.06501612  |
| O  | -6.24093599 | 6.08998326  | 1.84149295  |
| O  | -0.51459998 | 9.12933985  | 1.10448508  |
| O  | 6.63747496  | 6.63215440  | 1.32529453  |
| O  | 8.84133563  | -0.17818143 | 2.43499228  |
| O  | 4.27224937  | -6.16943017 | 3.87318998  |
| O  | -2.48790947 | -6.65479340 | 4.03603942  |
| N  | -2.05758486 | -7.17411829 | -3.09515545 |
| C  | -1.19151397 | -7.80666427 | -2.06697635 |
| C  | -1.82461258 | -2.03951704 | -6.29356047 |
| C  | -1.86268915 | -0.68910632 | -5.97172486 |
| C  | -1.32911754 | -0.23393445 | -4.76727987 |
| C  | -0.74657771 | -1.15527630 | -3.89165314 |
| C  | -0.70891803 | -2.50631262 | -4.22536866 |
| C  | -1.25165977 | -2.96946224 | -5.42312197 |
| C  | -0.09812545 | -5.24250162 | -5.25705275 |
| C  | -0.21503791 | -6.53080615 | -4.70408991 |
| C  | 0.94189870  | -7.25955837 | -4.39483297 |
| C  | 2.20548841  | -6.71863629 | -4.57758256 |

|   |             |             |             |
|---|-------------|-------------|-------------|
| C | 2.32472955  | -5.43880582 | -5.11364591 |
| C | 1.18614990  | -4.72254055 | -5.45861491 |
| C | -1.29869821 | -4.45099332 | -5.75063764 |
| C | -2.63245412 | -5.05007759 | -5.28032148 |
| C | -2.63207377 | -6.56805301 | -5.41686419 |
| C | -1.55879837 | -7.19752230 | -4.53859364 |
| C | -4.73239137 | 0.52713752  | -1.00954335 |
| C | -5.37501711 | -0.07805329 | 0.23580011  |
| C | -5.51250206 | 0.93810214  | 1.36480369  |
| C | -6.22718858 | 2.17905016  | 0.86276769  |
| C | -5.52134800 | 2.68775308  | -0.40199125 |
| C | -5.05112806 | -2.44559845 | 0.65731644  |
| C | -2.92643527 | -3.17451553 | -0.12553357 |
| C | -2.66485569 | -3.92575846 | 1.17336503  |
| C | -3.38073664 | -3.24518245 | 2.33597051  |
| C | -4.86301963 | -3.14234402 | 2.01512363  |
| C | -0.68025179 | -5.20269107 | 1.64022815  |
| C | 0.27383060  | -5.13481746 | 2.83188538  |
| C | 1.40703157  | -4.16792206 | 2.53537870  |
| C | 2.08269838  | -4.57527348 | 1.22607014  |
| C | 1.07052007  | -4.70254582 | 0.08835000  |
| C | 4.32547945  | -3.91014751 | 0.55048764  |
| C | 4.45328468  | -2.14932475 | -1.05452049 |
| C | 5.36720484  | -1.34722125 | -0.12840184 |
| C | 5.15610833  | -1.70014471 | 1.34287268  |
| C | 5.28311309  | -3.20260378 | 1.51180010  |
| C | 6.05617437  | 0.85912896  | -0.88026258 |
| C | 6.39249015  | 2.00204954  | 0.08282072  |
| C | 5.17721144  | 2.89247751  | 0.26650236  |
| C | 4.68261557  | 3.35967823  | -1.09721917 |
| C | 4.42804659  | 2.18286331  | -2.03662365 |
| C | 3.37404877  | 5.38548789  | -1.38785658 |
| C | 2.95220017  | 6.31100338  | -0.24031552 |
| C | 1.55040263  | 5.94496661  | 0.20883680  |
| C | 0.60378515  | 5.97204827  | -0.98381502 |
| C | 1.11189481  | 5.09556837  | -2.12598113 |
| C | -1.76648554 | 6.33451115  | -0.59725011 |
| C | -3.09461972 | 4.61207838  | -1.55341678 |
| C | -3.86226135 | 4.44004829  | -0.24521113 |
| C | -3.02644605 | 4.84791920  | 0.96150966  |
| C | -2.50983806 | 6.25958529  | 0.74016336  |
| C | -3.96290704 | 4.39333732  | -2.77992543 |
| C | 0.33509246  | 5.31201547  | -3.41515507 |
| C | 4.17706902  | 2.62794729  | -3.46794139 |
| C | 4.83101836  | -2.00219886 | -2.51844280 |
| C | 1.63750730  | -5.31631536 | -1.17928288 |
| C | -2.33835206 | -3.82346503 | -1.35896046 |
| C | -4.79377444 | -0.38683501 | -2.22068984 |
| C | -2.02806167 | 7.85652319  | 2.48579814  |
| C | 4.33786107  | 7.36650041  | 1.42604046  |
| C | 7.96239224  | 2.01091726  | 1.91018691  |
| C | 5.92808005  | -4.47621739 | 3.43039717  |
| C | -0.49012291 | -5.72979375 | 5.03879576  |
| C | -6.73024725 | -3.04651702 | 3.53085336  |
| C | -7.39361816 | 3.97012646  | 1.89859434  |
| C | -7.92184854 | -2.10421592 | 3.40858603  |
| C | -1.91632015 | -6.22762327 | 5.26208558  |
| C | 5.24523136  | -5.34291128 | 4.47752557  |

|   |             |             |             |
|---|-------------|-------------|-------------|
| C | 8.46295248  | 1.06090270  | 2.98959785  |
| C | 5.61538094  | 7.05882420  | 2.19558592  |
| C | -0.89468245 | 8.87659428  | 2.44203203  |
| C | -7.11568099 | 5.28955427  | 2.60295774  |
| C | -9.19473376 | -2.79448116 | 3.86501201  |
| C | -8.40711484 | 6.06360258  | 2.80159466  |
| C | -1.33180299 | 10.18143743 | 3.08319415  |
| C | 6.10901306  | 8.29771269  | 2.92002013  |
| C | 9.67487478  | 1.64767714  | 3.68966263  |
| C | 6.26111100  | -6.23046675 | 5.17388633  |
| C | -1.92803935 | -7.38196905 | 6.24696059  |
| H | -0.20876223 | -7.33532684 | -2.06783081 |
| H | -1.09319830 | -8.87114191 | -2.28561922 |
| H | -1.66407786 | -7.65991463 | -1.09549598 |
| H | -2.24533727 | -2.36880659 | -7.24010906 |
| H | -2.30379113 | 0.02936076  | -6.65435354 |
| H | -0.22333781 | -3.19454347 | -3.54136696 |
| H | 0.85144637  | -8.27569743 | -4.01931385 |
| H | 3.08651042  | -7.29570980 | -4.31781987 |
| H | 3.30618181  | -5.00550898 | -5.28202193 |
| H | 1.28907041  | -3.73597929 | -5.90161337 |
| H | -1.28284411 | -4.53461892 | -6.84807320 |
| H | -2.82285741 | -4.75421928 | -4.24009713 |
| H | -3.44992896 | -4.61875135 | -5.86567287 |
| H | -3.61954180 | -6.98870516 | -5.18609187 |
| H | -2.41543065 | -6.85176327 | -6.45297928 |
| H | -1.45906948 | -8.26597667 | -4.76102194 |
| H | -2.95396444 | -7.66630159 | -3.09539495 |
| H | -2.30506245 | -6.21306493 | -2.76249523 |
| H | -3.68963685 | 0.79901257  | -0.79551733 |
| H | -6.36847751 | -0.45372347 | -0.04329207 |
| H | -4.50371675 | 1.23090848  | 1.69089733  |
| H | -7.26269121 | 1.90912379  | 0.60998927  |
| H | -6.06696764 | 3.52248663  | -0.85513726 |
| H | -6.10390616 | -2.47588883 | 0.36007120  |
| H | -2.52667039 | -2.15478660 | -0.04312015 |
| H | -3.04803338 | -4.95132269 | 1.06656365  |
| H | -2.97721593 | -2.22820674 | 2.44747690  |
| H | -5.26524987 | -4.16137712 | 1.92465937  |
| H | -1.42697241 | -5.98117941 | 1.82874306  |
| H | 0.70239111  | -6.13835429 | 2.95914878  |
| H | 0.98577264  | -3.15932215 | 2.40800090  |
| H | 2.59815294  | -5.53530982 | 1.37597191  |
| H | 0.67827779  | -3.69886701 | -0.12765671 |
| H | 4.46019802  | -4.99662620 | 0.60603713  |
| H | 3.41436530  | -1.82726132 | -0.89898889 |
| H | 6.41046230  | -1.56061300 | -0.39908436 |
| H | 4.13349384  | -1.40245606 | 1.62246155  |
| H | 6.31124039  | -3.49237174 | 1.25738329  |
| H | 6.95848141  | 0.28308352  | -1.11233607 |
| H | 7.20724521  | 2.59231895  | -0.35981289 |
| H | 4.38256371  | 2.28934364  | 0.73272244  |
| H | 5.43943837  | 4.01059339  | -1.55563039 |
| H | 3.57236608  | 1.60207329  | -1.66393067 |
| H | 4.33287961  | 5.71432932  | -1.80280730 |
| H | 2.95681227  | 7.34371070  | -0.61698717 |
| H | 1.58047845  | 4.91791307  | 0.60203849  |
| H | 0.50626472  | 6.99997486  | -1.35973426 |

|   |              |             |             |
|---|--------------|-------------|-------------|
| H | 1.06107133   | 4.04030288  | -1.82172515 |
| H | -1.47058297  | 7.36988672  | -0.79596718 |
| H | -2.25119448  | 3.90622402  | -1.56900405 |
| H | -4.76378471  | 5.06628356  | -0.27251413 |
| H | -2.16769313  | 4.16668671  | 1.05068581  |
| H | -3.37300426  | 6.93484631  | 0.67153359  |
| H | -3.34680957  | 4.57107133  | -3.67466600 |
| H | -4.30533948  | 3.35491421  | -2.80245950 |
| H | 0.67685522   | 4.57682383  | -4.16089045 |
| H | -0.72912303  | 5.14603085  | -3.22639896 |
| H | 3.92967136   | 1.74209849  | -4.07359177 |
| H | 3.32320950   | 3.31069009  | -3.49021451 |
| H | 4.08545933   | -2.54071409 | -3.12639850 |
| H | 4.80195115   | -0.94491432 | -2.79637753 |
| H | 0.90597331   | -5.17927969 | -1.99410809 |
| H | 2.55743304   | -4.79807342 | -1.46651559 |
| H | -1.29175327  | -4.07687001 | -1.18413716 |
| H | -2.40867447  | -3.13036857 | -2.20514151 |
| H | -4.26884261  | -1.31962583 | -1.99956143 |
| H | -4.27963581  | 0.11370918  | -3.05557990 |
| H | -2.27832685  | 7.59406918  | 3.52120716  |
| H | -2.91728041  | 8.29925421  | 2.02044880  |
| H | 3.55010673   | 7.74677047  | 2.08821299  |
| H | 4.56235590   | 8.12478541  | 0.66231543  |
| H | 7.69990745   | 2.99099353  | 2.32677269  |
| H | 8.75487358   | 2.13947257  | 1.15899087  |
| H | 6.73639815   | -3.87812254 | 3.87175553  |
| H | 6.35687840   | -5.14398058 | 2.67007417  |
| H | -0.09785327  | -5.26188250 | 5.94891494  |
| H | 0.15640561   | -6.58090160 | 4.79175429  |
| H | -6.55413600  | -3.32147852 | 4.57828763  |
| H | -6.95188553  | -3.96226984 | 2.96739010  |
| H | -8.17425625  | 3.40089614  | 2.42335263  |
| H | -7.74665537  | 4.19778403  | 0.88247650  |
| H | -7.73577525  | -1.22894666 | 4.04947268  |
| H | -2.51087970  | -5.39756842 | 5.67216564  |
| H | 4.77670685   | -4.67772569 | 5.22082081  |
| H | 7.65130305   | 0.92500430  | 3.72412087  |
| H | 5.38360058   | 6.27478045  | 2.93637489  |
| H | -0.03977582  | 8.46751618  | 3.00305348  |
| H | -6.67588540  | 5.05986281  | 3.58739584  |
| H | -9.10835542  | -3.16168005 | 4.89247138  |
| H | -9.42112612  | -3.64130822 | 3.20895493  |
| H | -10.03399339 | -2.09745312 | 3.81517113  |
| H | -9.12560453  | 5.50346206  | 3.40719720  |
| H | -8.86510175  | 6.29270178  | 1.83386876  |
| H | -8.19121598  | 7.01031517  | 3.30138462  |
| H | -1.67134001  | 10.03018917 | 4.11269061  |
| H | -2.14945850  | 10.62727584 | 2.50786764  |
| H | -0.50060690  | 10.88996423 | 3.09096373  |
| H | 5.36142129   | 8.67663243  | 3.62302259  |
| H | 6.34712508   | 9.08674168  | 2.19965660  |
| H | 7.02122439   | 8.06123346  | 3.47206899  |
| H | 9.44493148   | 2.61350319  | 4.14884462  |
| H | 10.49388231  | 1.78345706  | 2.97622783  |
| H | 10.01748147  | 0.96198400  | 4.46768769  |
| H | 7.04167369   | -5.64162597 | 5.66443604  |
| H | 6.73259931   | -6.90554002 | 4.45231477  |

|   |             |             |             |
|---|-------------|-------------|-------------|
| H | 5.75949402  | -6.84204315 | 5.92697136  |
| H | -1.45466216 | -7.10459536 | 7.19398491  |
| H | -1.39151057 | -8.23986511 | 5.82909596  |
| H | -2.95530843 | -7.69180923 | 6.45091587  |
| H | -4.34618811 | 4.00835968  | 2.10904935  |
| H | 0.22488425  | 6.53831564  | 1.48906508  |
| H | 1.41651955  | 6.78487454  | -3.97613095 |
| H | 4.74316004  | 4.58740886  | 1.09039912  |
| H | 6.03695690  | 2.73565357  | -3.90632781 |
| H | 6.09100122  | -0.10890158 | 1.91764301  |
| H | 3.12061348  | -3.69883684 | 3.32184840  |
| H | 1.30749489  | -6.99763010 | -0.32719969 |
| H | -3.96439964 | -4.82806583 | -1.57890387 |
| H | -2.22651750 | -3.96847866 | 3.70473756  |
| H | -5.73294482 | -0.41638319 | 2.72780947  |
| H | -6.58679039 | 0.10268845  | -2.67580749 |
| H | -4.80391159 | 6.11937613  | -2.72166024 |
| H | 6.17536084  | -3.36060521 | -2.41328340 |
| H | -7.62246640 | -0.83301308 | 2.00348627  |
| H | -5.33373679 | 5.78254121  | 2.01200570  |
| H | 0.20889956  | 8.51531760  | 0.90856919  |
| H | 6.45479841  | 5.71564964  | 1.07431106  |
| H | 8.03523843  | -0.68012129 | 2.24944156  |
| H | 3.45639773  | -5.64739912 | 3.81911124  |
| H | -3.00077645 | -5.89996507 | 3.71036694  |



2-HP-B-CD:cis-(1S,4S)-SRT\_5\_Cl E(Ha)= -7253.8647645931

|    |             |             |             |
|----|-------------|-------------|-------------|
| Cl | 2.28981923  | 1.21727412  | 2.52028158  |
| Cl | 0.42190036  | 2.06473956  | 0.06385863  |
| O  | -6.03509629 | -1.38208314 | -2.21509285 |
| O  | -2.20321270 | -4.67024922 | -3.73352667 |
| O  | 1.14933478  | -4.33893033 | -2.31551649 |
| O  | 3.02248794  | -4.32796851 | -3.68610051 |
| O  | 4.45693486  | -1.50012898 | -1.83861477 |
| O  | 5.87738802  | -0.05687231 | -2.96924391 |
| O  | 4.37645978  | 2.84702642  | -1.32552493 |
| O  | 4.12666190  | 4.80279675  | -2.53505298 |
| O  | 0.86601366  | 5.37954837  | -0.97305651 |
| O  | -0.80368615 | 6.32226511  | -2.27601734 |
| O  | -3.39232423 | 4.25589301  | -0.71854641 |
| O  | -5.25528042 | 3.73469477  | -1.99520176 |
| O  | -4.95429965 | 4.34973473  | 1.57871860  |
| O  | -5.64579454 | 1.58779991  | 1.52128640  |
| O  | -5.05882028 | 0.24998320  | -0.88247088 |
| O  | -2.56155649 | 5.87820062  | 1.43225701  |
| O  | 0.14595096  | 6.84603772  | 1.17456326  |
| O  | -3.19223948 | 6.53754727  | -3.59906478 |
| O  | 2.65012023  | 5.69772327  | 1.21475849  |
| O  | 5.09862736  | 4.19824527  | 0.89202772  |
| O  | 2.71579360  | 6.86236428  | -3.74489224 |
| O  | 5.93494556  | -1.32100009 | 0.41597298  |
| O  | 5.60544706  | 1.51434549  | 0.84437067  |
| O  | 4.28945165  | -3.43846545 | 0.17184885  |
| O  | 2.53959521  | -5.62506327 | -0.33037249 |
| O  | 5.33345115  | -3.38351525 | -4.85456933 |
| O  | -0.28532010 | -5.68690236 | -5.43974102 |
| O  | -2.95597898 | -5.71926681 | -0.32943561 |
| O  | -0.15167426 | -5.85225094 | -0.31019270 |
| O  | -3.90363099 | -3.37967126 | 0.74842928  |
| O  | -5.65779292 | -1.26593024 | 1.41123130  |
| O  | -5.95076222 | -3.64378911 | -3.91988628 |
| O  | -7.02373945 | 2.16309865  | -3.35994601 |
| O  | 6.72442446  | 2.34426831  | -4.07046357 |
| O  | -5.68525718 | -5.51611741 | 0.74490878  |
| O  | -8.05810588 | 0.20641740  | 1.60683633  |
| O  | -5.04509385 | 7.16400815  | 1.43450636  |
| O  | 2.29746695  | 8.39197150  | 2.17282296  |
| O  | 7.50488404  | 3.33398074  | 2.08434389  |
| O  | 6.45362313  | -3.62447061 | 2.04800772  |
| O  | 1.31978177  | -8.22266267 | 0.19397244  |
| O  | -3.02819398 | -3.45507640 | -1.94544055 |
| N  | -0.70160253 | -3.66472001 | 6.11357089  |
| C  | -0.48022423 | -4.81020146 | 5.10543189  |
| C  | -1.58499051 | -4.71428889 | 4.06554924  |
| C  | -1.40717552 | -3.46726891 | 3.21014921  |
| C  | -0.06454389 | -3.47619216 | 2.45871859  |
| C  | 2.39070952  | -3.98098931 | 2.76698324  |
| C  | 3.46550827  | -4.55442994 | 3.43898026  |
| C  | 3.25636586  | -5.22894782 | 4.64103669  |
| C  | 1.97176103  | -5.30859211 | 5.15892180  |
| C  | 0.89260398  | -4.69497840 | 4.50653837  |
| C  | 1.08980357  | -4.02363775 | 3.28470448  |
| C  | 0.15363633  | -2.09859306 | 1.85255215  |

|   |             |             |             |
|---|-------------|-------------|-------------|
| C | 1.04330882  | -1.16491310 | 2.37937563  |
| C | 1.14759005  | 0.11722430  | 1.83783082  |
| C | 0.33964031  | 0.48809803  | 0.75941433  |
| C | -0.55626520 | -0.43971503 | 0.23226291  |
| C | -0.64521816 | -1.71366768 | 0.77089411  |
| C | 0.14335751  | -3.68286153 | 7.33552743  |
| C | -4.79407198 | -1.94632697 | -2.63164405 |
| C | -4.32730384 | -2.98505307 | -1.61278475 |
| C | -4.26613352 | -2.39705382 | -0.20838611 |
| C | -5.63702502 | -1.82539231 | 0.11594762  |
| C | -6.00633338 | -0.78079028 | -0.94457614 |
| C | -2.92083007 | -4.73216353 | -2.53826277 |
| C | -0.85962690 | -4.19284996 | -3.62876556 |
| C | -0.07723884 | -4.99795980 | -2.58932124 |
| C | -0.83652338 | -5.08488789 | -1.26918442 |
| C | -2.21589403 | -5.65466118 | -1.53329280 |
| C | 2.36480503  | -4.96866725 | -2.63125393 |
| C | 3.22902862  | -4.95243155 | -1.36507390 |
| C | 3.51949891  | -3.50836421 | -1.00307026 |
| C | 4.23813419  | -2.85918691 | -2.17924505 |
| C | 3.40608453  | -2.96675736 | -3.45768944 |
| C | 5.76276115  | -0.98251891 | -1.92914578 |
| C | 5.04134689  | 1.09980776  | -2.85646697 |
| C | 5.32954609  | 1.82028692  | -1.54146929 |
| C | 5.22885209  | 0.87500373  | -0.35055737 |
| C | 6.11263411  | -0.33776169 | -0.58325617 |
| C | 4.77528259  | 4.18754581  | -1.45780584 |
| C | 4.45322294  | 4.90588874  | -0.14354055 |
| C | 2.94979307  | 4.94588576  | 0.06244669  |
| C | 2.26748455  | 5.52709630  | -1.16925519 |
| C | 2.69894326  | 4.81714044  | -2.45041210 |
| C | 0.04296306  | 6.49910260  | -1.17392277 |
| C | -0.76555733 | 6.73844104  | 0.10631910  |
| C | -1.74930056 | 5.60168354  | 0.31329372  |
| C | -2.59634714 | 5.41208286  | -0.93804261 |
| C | -1.72892467 | 5.23668898  | -2.18200880 |
| C | -4.78524094 | 4.35786088  | -0.82753529 |
| C | -4.96643270 | 2.34033858  | -2.10600023 |
| C | -5.51082931 | 1.59873081  | -0.88670150 |
| C | -5.04294331 | 2.22867051  | 0.42012848  |
| C | -5.40477011 | 3.70097644  | 0.41200804  |
| C | -5.64459791 | 1.90293049  | -3.39512152 |
| C | -2.54008670 | 5.30090268  | -3.46634830 |
| C | 2.23075530  | 5.54351047  | -3.70017486 |
| C | 5.37361398  | 1.95527808  | -4.06768480 |
| C | 4.20042587  | -2.56811225 | -4.69111596 |
| C | -0.27065599 | -4.34538112 | -5.02176758 |
| C | -5.04851191 | -2.56608663 | -3.99530461 |
| C | -5.92775772 | 5.10022706  | 2.30178854  |
| C | -0.07104461 | 7.91683270  | 2.08758456  |
| C | 5.74123967  | 4.98198575  | 1.89226573  |
| C | 6.83867166  | -1.27467984 | 1.51792772  |
| C | 3.22686548  | -6.73162193 | 0.25301029  |
| C | -3.90433536 | -6.78717414 | -0.30039655 |
| C | -6.72067132 | -1.68858446 | 2.26434490  |
| C | -4.83643883 | -6.62969023 | 0.89213058  |
| C | 2.24161779  | -7.58246796 | 1.04295223  |
| C | 6.38663021  | -2.30097456 | 2.54370777  |

|   |             |             |             |
|---|-------------|-------------|-------------|
| C | 6.51908901  | 4.04022138  | 2.80042319  |
| C | 1.17239921  | 8.06700972  | 2.95346879  |
| C | -5.39776061 | 6.49222653  | 2.62414609  |
| C | -7.57243739 | -0.50807831 | 2.72210790  |
| C | -5.71383833 | -7.86067871 | 1.03628313  |
| C | -8.75076385 | -0.99639551 | 3.54648819  |
| C | -6.45371341 | 7.30603113  | 3.35101328  |
| C | 0.97833677  | 9.17619129  | 3.97135984  |
| C | 7.21736041  | 4.81769919  | 3.90052397  |
| C | 7.26174352  | -2.24311569 | 3.78127762  |
| C | 2.98467817  | -8.66126802 | 1.81153453  |
| H | -2.57543072 | -4.73984228 | 4.53935675  |
| H | -2.23166706 | -3.38060679 | 2.49466443  |
| H | -1.47563409 | -2.55225428 | 3.82093729  |
| H | -0.17919978 | -4.18606842 | 1.62355311  |
| H | 2.58229261  | -3.50733851 | 1.80902940  |
| H | 4.46487153  | -4.48060439 | 3.01271598  |
| H | 4.08439271  | -5.70414162 | 5.15787071  |
| H | 1.79322303  | -5.87474777 | 6.07127110  |
| H | 1.69363773  | -1.42362321 | 3.20868419  |
| H | -1.18393246 | -0.14909333 | -0.60383499 |
| H | -1.36601462 | -2.41081971 | 0.35546518  |
| H | -0.10522068 | -2.81828964 | 7.95218203  |
| H | -0.05428381 | -4.60319030 | 7.88596938  |
| H | 1.18920922  | -3.64564001 | 7.03322938  |
| H | -0.54540339 | -2.79013960 | 5.60466908  |
| H | -1.68978252 | -3.66552298 | 6.38099220  |
| H | -0.56920136 | -5.71778841 | 5.71179609  |
| H | -1.51946300 | -5.60954859 | 3.43703156  |
| H | -5.15289670 | 2.40673748  | -4.24117379 |
| H | 5.10562978  | 1.39788060  | -4.97793803 |
| H | -5.09770758 | 5.40568874  | -0.89049768 |
| H | -6.49588780 | 3.79248680  | 0.32802787  |
| H | -3.94853085 | 2.13955666  | 0.48310585  |
| H | -5.38581753 | 0.64783041  | 1.48064569  |
| H | -6.60798022 | 1.62874293  | -0.93760266 |
| H | -3.88019485 | 2.18108143  | -2.17058751 |
| H | -5.52578597 | 0.82309691  | -3.51967975 |
| H | 0.65017451  | 7.38008339  | -1.40730680 |
| H | -1.32139332 | 7.67905154  | -0.01392177 |
| H | -1.17401830 | 4.67993962  | 0.48505933  |
| H | -3.19923928 | 5.14294371  | 1.51758441  |
| H | -3.23663812 | 6.29179565  | -1.09082058 |
| H | -1.18898515 | 4.28119066  | -2.11836206 |
| H | -1.87110126 | 5.09606981  | -4.31625291 |
| H | -3.31624170 | 4.53105529  | -3.44322010 |
| H | -2.50227933 | 7.21117306  | -3.58078714 |
| H | 5.84670021  | 4.25013421  | -1.67672235 |
| H | 4.84438287  | 5.93096791  | -0.20387333 |
| H | 2.60712553  | 3.90878869  | 0.18937948  |
| H | 1.68042005  | 5.81140258  | 1.23798682  |
| H | 2.52758577  | 6.59028172  | -1.25879585 |
| H | 2.31148514  | 3.78877346  | -2.44257974 |
| H | 2.54272811  | 4.96247725  | -4.58131186 |
| H | 1.13878515  | 5.60296313  | -3.69639455 |
| H | 3.67796394  | 6.80061059  | -3.73042023 |
| H | 6.47319739  | -1.78319918 | -2.16221837 |
| H | 7.16549466  | -0.02404631 | -0.61818392 |

|   |             |             |             |
|---|-------------|-------------|-------------|
| H | 4.18747923  | 0.52477347  | -0.27936069 |
| H | 5.13591665  | 2.37182888  | 0.87481909  |
| H | 6.34333046  | 2.24030888  | -1.58988996 |
| H | 3.98317887  | 0.80378464  | -2.88006310 |
| H | 4.77562064  | 2.87047264  | -4.03660570 |
| H | 2.18979620  | -5.99703961 | -2.96713744 |
| H | 4.17315294  | -5.46927238 | -1.57986619 |
| H | 2.56049179  | -2.98900794 | -0.85332016 |
| H | 4.64704839  | -2.52724918 | 0.22309046  |
| H | 5.19728784  | -3.36751971 | -2.34890305 |
| H | 2.51241226  | -2.33478327 | -3.35716376 |
| H | 3.53682552  | -2.60622203 | -5.56772755 |
| H | 4.55801334  | -1.54148458 | -4.57307090 |
| H | 5.00753427  | -4.28395163 | -4.96600952 |
| H | -3.91482459 | -5.10591782 | -2.80817833 |
| H | -2.11900641 | -6.66060392 | -1.96522397 |
| H | -0.95596721 | -4.05658983 | -0.90105868 |
| H | 0.78963117  | -5.57376760 | -0.33361865 |
| H | 0.10555504  | -6.00559178 | -2.98737697 |
| H | -0.85907234 | -3.13600182 | -3.32799397 |
| H | 0.77492493  | -4.02444789 | -5.00675051 |
| H | -0.82375813 | -3.69269456 | -5.71308813 |
| H | -1.21048920 | -5.95687890 | -5.46277775 |
| H | -7.01683303 | -0.40364699 | -0.75685509 |
| H | -6.37440634 | -2.63637970 | 0.04896561  |
| H | -3.53169411 | -1.58001968 | -0.18665779 |
| H | -3.39407202 | -4.07743463 | 0.28555679  |
| H | -5.04170986 | -3.81958137 | -1.61124467 |
| H | -4.02831314 | -1.16167731 | -2.71741556 |
| H | -4.10954259 | -2.96134100 | -4.39390862 |
| H | -5.40566155 | -1.77992930 | -4.67593157 |
| H | -6.78461637 | -3.28611121 | -3.59342851 |
| H | -7.11505441 | 3.11328748  | -3.22137356 |
| H | 7.24409078  | 1.53264135  | -4.09582027 |
| H | -3.35867987 | -7.73931017 | -0.24164627 |
| H | -4.51309103 | -6.78643755 | -1.21534715 |
| H | 4.03114299  | -6.35626403 | 0.89884814  |
| H | 3.66404000  | -7.35781421 | -0.53684961 |
| H | 6.83358491  | -0.27199659 | 1.95818743  |
| H | 7.85443694  | -1.51790587 | 1.17309244  |
| H | 4.99340286  | 5.55153213  | 2.45761357  |
| H | 6.44379352  | 5.68138723  | 1.41627782  |
| H | -0.96039565 | 7.71123738  | 2.69690032  |
| H | -6.18855732 | 4.55460436  | 3.21824433  |
| H | -6.83595461 | 5.21324212  | 1.69639151  |
| H | -6.28399336 | -2.20572917 | 3.12927257  |
| H | -7.36297745 | -2.40183572 | 1.73343198  |
| H | -4.20661640 | -6.52591150 | 1.79391080  |
| H | -6.94438746 | 0.15033829  | 3.34264729  |
| H | -4.51446273 | 6.38390226  | 3.27382373  |
| H | 1.32949758  | 7.11221559  | 3.48444115  |
| H | 5.79420789  | 3.34150077  | 3.25454371  |
| H | 5.34759202  | -2.04695847 | 2.81922393  |
| H | 1.72457489  | -6.92024402 | 1.75880413  |
| H | 6.50312527  | 5.37777674  | 4.51099302  |
| H | 7.93689946  | 5.51975326  | 3.46790933  |
| H | 7.76749039  | 4.12915066  | 4.54587857  |
| H | 7.22135602  | -1.25631072 | 4.25049718  |

|   |             |             |             |
|---|-------------|-------------|-------------|
| H | 8.30056131  | -2.46874312 | 3.52233534  |
| H | 6.92802777  | -2.98937105 | 4.50657473  |
| H | 3.68815050  | -8.23034143 | 2.52985547  |
| H | 3.53684032  | -9.30765285 | 1.12211401  |
| H | 2.26752693  | -9.28510904 | 2.34964450  |
| H | -5.11986368 | -8.76442602 | 1.19930730  |
| H | -6.32375638 | -7.99803816 | 0.13796052  |
| H | -6.39208494 | -7.72809520 | 1.88195515  |
| H | -8.42518323 | -1.59050179 | 4.40657661  |
| H | -9.41285013 | -1.61123398 | 2.92864919  |
| H | -9.32800977 | -0.14395630 | 3.91099446  |
| H | -6.78299395 | 6.81188181  | 4.27043427  |
| H | -7.32382374 | 7.45727172  | 2.70417616  |
| H | -6.05251121 | 8.28890119  | 3.60759321  |
| H | 0.12163158  | 8.97940224  | 4.62267595  |
| H | 0.82109471  | 10.13222626 | 3.46206665  |
| H | 1.87472565  | 9.26910448  | 4.58842489  |
| H | -5.16199416 | -4.71048754 | 0.89245578  |
| H | -7.42013385 | 0.92112148  | 1.45056547  |
| H | -4.10860779 | 6.96489762  | 1.27926674  |
| H | 2.58498014  | 7.58999668  | 1.71215850  |
| H | 7.05904817  | 2.69521165  | 1.51025517  |
| H | 5.91015147  | -3.69245636 | 1.24953077  |
| H | 0.65944719  | -7.57411083 | -0.09084438 |
| H | -0.22595866 | 8.85152408  | 1.52960307  |

2-HP-B-CD:cis-(1S,4S)-SRT\_6\_Cl E(Ha)= -7253.8582417411

|    |             |             |             |
|----|-------------|-------------|-------------|
| Cl | -1.29195769 | -3.91547386 | 6.21824194  |
| Cl | -3.57441823 | -2.54251706 | 4.46076172  |
| O  | 1.50599071  | 5.78785529  | -2.80901483 |
| O  | -1.69878648 | 5.26322530  | -1.12990041 |
| O  | -3.77109531 | 5.61264102  | -2.12454863 |
| O  | -4.24619236 | 2.16961125  | -1.00909495 |
| O  | -5.66622338 | 0.60488368  | -1.98367713 |
| O  | -3.36867391 | -2.26251287 | -1.83406969 |
| O  | -3.10062050 | -3.88320314 | -3.45266566 |
| O  | 0.06901039  | -5.07244407 | -2.04895264 |
| O  | 1.82026260  | -5.76389937 | -3.39174278 |
| O  | 3.73504038  | -3.67085376 | -1.12863053 |
| O  | 5.86499637  | -2.79551242 | -1.33064307 |
| O  | 4.65437638  | 0.58419674  | -0.57621218 |
| O  | 5.47821691  | 2.42451615  | -1.71767666 |
| O  | 5.08591577  | 1.83018329  | 1.85189322  |
| O  | 3.23382074  | 3.91618842  | 1.46755954  |
| O  | 2.41216092  | 4.37609926  | -1.21964405 |
| O  | 4.12456719  | -0.79744175 | 1.86775707  |
| O  | 3.99450070  | -3.59932535 | 1.69508627  |
| O  | 7.72509664  | -0.70020495 | -1.76986611 |
| O  | 3.10501576  | -5.96275835 | 0.55472562  |
| O  | 0.61463916  | -7.16402071 | -0.27034447 |
| O  | 4.43968228  | -5.78391732 | -4.22338784 |
| O  | -4.10497410 | -4.17711004 | 0.03192300  |
| O  | -1.79491734 | -5.75115202 | 0.00234715  |
| O  | -3.68546244 | -1.59224905 | 0.92738596  |
| O  | -4.62639349 | 0.95822698  | 1.49933261  |
| O  | -6.46719408 | -1.75364572 | -3.39452829 |
| O  | -6.28957797 | 4.76548615  | -2.94621970 |
| O  | -2.87251815 | 6.03344256  | 1.36897921  |
| O  | -4.62052578 | 3.75256776  | 1.44719974  |
| O  | -0.25818644 | 6.88404740  | 0.76020795  |
| O  | 2.54416811  | 6.48191457  | 0.60592644  |
| O  | -0.50826333 | 7.02802245  | -4.22198732 |
| O  | 5.23081092  | 4.85892427  | -3.18639478 |
| O  | -1.77114904 | -5.67543815 | -5.12036013 |
| O  | -2.40816952 | 8.72102425  | 0.79363193  |
| O  | 5.19657920  | 5.89899610  | 1.58621435  |
| O  | 6.56673028  | -0.36975782 | 3.08127956  |
| O  | 5.64232840  | -5.81891550 | 1.93828445  |
| O  | -1.94953573 | -8.42715208 | -0.73312236 |
| O  | -6.18190191 | -2.72437940 | 1.37010671  |
| O  | -7.03296000 | 2.23109427  | 1.95378857  |
| N  | -1.24175418 | 2.27002286  | -0.99882455 |
| C  | -1.37681574 | 1.72566407  | -2.37209425 |
| C  | 0.75001034  | -1.42105548 | 3.86324199  |
| C  | 0.41887827  | -2.37708775 | 4.81373308  |
| C  | -0.91184513 | -2.73399058 | 5.02070289  |
| C  | -1.90787208 | -2.12734405 | 4.24884177  |
| C  | -1.57094205 | -1.17271516 | 3.29198531  |
| C  | -0.24155983 | -0.80107892 | 3.09704245  |
| C  | 0.36089614  | -0.27379999 | 0.66813318  |
| C  | 0.52641152  | 0.63640398  | -0.39279611 |
| C  | 1.01858693  | 0.18622997  | -1.62321251 |
| C  | 1.17914514  | -1.16788073 | -1.87362439 |

|   |             |             |             |
|---|-------------|-------------|-------------|
| C | 0.86559107  | -2.08023522 | -0.87115852 |
| C | 0.51180380  | -1.63430702 | 0.39775573  |
| C | 0.16083614  | 0.24640165  | 2.08294207  |
| C | -0.71238216 | 1.50179553  | 2.07545405  |
| C | -0.08079008 | 2.55499005  | 1.16790183  |
| C | 0.09954698  | 2.07323554  | -0.26949186 |
| C | 0.17180716  | 5.32650601  | -2.65057073 |
| C | -0.51753084 | 6.00590827  | -1.46616312 |
| C | 0.34633796  | 6.07389874  | -0.21246931 |
| C | 1.73748306  | 6.58126648  | -0.54423153 |
| C | 2.31794381  | 5.71455270  | -1.67155356 |
| C | -2.94321751 | 5.95345312  | -1.05351337 |
| C | -4.03755145 | 4.22120715  | -2.26113167 |
| C | -4.50554482 | 3.57665928  | -0.94880236 |
| C | -3.85428000 | 4.10775046  | 0.32893418  |
| C | -3.63800218 | 5.60609221  | 0.26531840  |
| C | -5.33626531 | 1.28164643  | -0.80624462 |
| C | -5.00387833 | 0.29003941  | 0.30859322  |
| C | -3.92493406 | -0.69469517 | -0.12671893 |
| C | -4.39684325 | -1.38908728 | -1.39599855 |
| C | -4.71650676 | -0.34825594 | -2.47079215 |
| C | -3.77282853 | -3.55114718 | -2.27863052 |
| C | -1.68017873 | -4.03243693 | -3.34662651 |
| C | -1.33186885 | -5.07818337 | -2.28638322 |
| C | -2.00621314 | -4.74878780 | -0.95835726 |
| C | -3.50010640 | -4.58456190 | -1.17627151 |
| C | 0.87655589  | -6.16216971 | -2.43873594 |
| C | 1.58166272  | -6.69313133 | -1.18224963 |
| C | 2.37493526  | -5.55347291 | -0.57480746 |
| C | 3.31307004  | -4.93934215 | -1.61446727 |
| C | 2.67263980  | -4.69385213 | -2.98511138 |
| C | 4.99231258  | -3.54464623 | -0.52272138 |
| C | 4.82763227  | -2.84776818 | 0.83254517  |
| C | 4.26679485  | -1.44752599 | 0.61692599  |
| C | 5.21716575  | -0.69745074 | -0.30753633 |
| C | 5.42902984  | -1.46661930 | -1.61191538 |
| C | 5.51315528  | 1.69691823  | -0.51689369 |
| C | 4.20757330  | 2.96969278  | -2.05710384 |
| C | 3.71937319  | 3.87810962  | -0.92791780 |
| C | 3.66999750  | 3.11349003  | 0.38922694  |
| C | 5.07277175  | 2.57960080  | 0.65828712  |
| C | 4.40716708  | 3.73097171  | -3.35681958 |
| C | 6.51549223  | -0.84617121 | -2.47342978 |
| C | 3.72684219  | -4.58469392 | -4.07663602 |
| C | -1.21433055 | -4.44610833 | -4.73261049 |
| C | -5.34210440 | -0.97219155 | -3.70735073 |
| C | -5.11351984 | 4.10871413  | -3.33384557 |
| C | -0.52594809 | 5.65124499  | -3.96531215 |
| C | 6.29136787  | 1.98546944  | 2.60681591  |
| C | 4.54870156  | -3.92910178 | 2.96974605  |
| C | 0.41676047  | -8.57803476 | -0.30574525 |
| C | -5.40402283 | -4.72458509 | 0.25449458  |
| C | -5.39139720 | 0.61161326  | 2.66765208  |
| C | -3.44802393 | 7.05435119  | 2.19119268  |
| C | 3.58442072  | 7.45834911  | 0.68150378  |
| C | -2.62045337 | 8.33575196  | 2.14059987  |
| C | -6.31608364 | 1.75553967  | 3.08264174  |
| C | -6.00226822 | -4.12089451 | 1.51537853  |

|   |             |              |             |
|---|-------------|--------------|-------------|
| C | -0.98613367 | -8.92469140  | 0.16944577  |
| C | 4.87479856  | -5.42066360  | 3.06065167  |
| C | 6.39042549  | 0.89968892   | 3.66789025  |
| C | 4.52387791  | 7.11674054   | 1.82860795  |
| C | -3.33405585 | 9.45566534   | 2.87571759  |
| C | 5.57016333  | 8.20375313   | 1.99348760  |
| C | 7.57918975  | 1.16234276   | 4.57526410  |
| C | 5.65533814  | -5.71875278  | 4.32754409  |
| C | -1.15445990 | -10.43112744 | 0.25929026  |
| C | -7.35633750 | -4.73762063  | 1.81011957  |
| C | -7.29569578 | 1.28268788   | 4.14078955  |
| H | -1.22097939 | 0.64907262   | -2.35215416 |
| H | -0.64115221 | 2.19557574   | -3.02485710 |
| H | -2.38580416 | 1.94356803   | -2.71454094 |
| H | 1.79476415  | -1.16579041  | 3.70040604  |
| H | 1.18808903  | -2.85362557  | 5.41222243  |
| H | -2.36839708 | -0.75595733  | 2.68633305  |
| H | 1.24923972  | 0.90870710   | -2.40258226 |
| H | 1.53706771  | -1.50777580  | -2.84058762 |
| H | 0.91967460  | -3.14150914  | -1.07506914 |
| H | 0.35790632  | -2.35203321  | 1.19727318  |
| H | 1.16517005  | 0.57753320   | 2.39081491  |
| H | -1.73755536 | 1.25770368   | 1.76177021  |
| H | -0.79331084 | 1.90301408   | 3.09011380  |
| H | -0.66283617 | 3.48493758   | 1.18698984  |
| H | 0.91418108  | 2.81661709   | 1.55058545  |
| H | 0.78879614  | 2.73278204   | -0.80923627 |
| H | -1.42314216 | 3.29036636   | -1.02721658 |
| H | -2.00849088 | 1.87208970   | -0.44297548 |
| H | 0.18068696  | 4.23748225   | -2.49071817 |
| H | -0.79369957 | 7.02140873   | -1.77608067 |
| H | 0.47068326  | 5.05118961   | 0.17097024  |
| H | 1.67962584  | 7.62440933   | -0.88674211 |
| H | 3.30398012  | 6.06772179   | -1.99103634 |
| H | -2.77717604 | 7.03264384   | -1.10483546 |
| H | -3.12785909 | 3.72035095   | -2.61358726 |
| H | -5.58446194 | 3.76166607   | -0.86758559 |
| H | -2.85364459 | 3.66607798   | 0.42853269  |
| H | -4.60870154 | 6.11674067   | 0.25165911  |
| H | -6.22533198 | 1.85044988   | -0.52063666 |
| H | -5.92298312 | -0.28187844  | 0.48443585  |
| H | -2.98980472 | -0.15342511  | -0.35710231 |
| H | -5.31081783 | -1.94969164  | -1.16265008 |
| H | -3.78507073 | 0.15869398   | -2.76220636 |
| H | -4.83728713 | -3.52933179  | -2.53917091 |
| H | -1.22341829 | -3.07278951  | -3.06441725 |
| H | -1.65583757 | -6.06827758  | -2.63357430 |
| H | -1.60136364 | -3.78705874  | -0.60303043 |
| H | -3.91330726 | -5.55137954  | -1.49824046 |
| H | 0.26708653  | -6.93957219  | -2.91202871 |
| H | 2.26301857  | -7.50341009  | -1.47423640 |
| H | 1.65255983  | -4.78540148  | -0.27381722 |
| H | 4.17223659  | -5.61079052  | -1.74942994 |
| H | 2.09420492  | -3.76229771  | -2.93395009 |
| H | 5.46875674  | -4.51885649  | -0.38065145 |
| H | 5.83169059  | -2.76905536  | 1.26816190  |
| H | 3.28495165  | -1.52940888  | 0.13512104  |
| H | 6.18417259  | -0.58055138  | 0.19942752  |



|   |             |              |             |
|---|-------------|--------------|-------------|
| H | 4.48076496  | -1.48786679  | -2.16850057 |
| H | 6.55295272  | 1.37119734   | -0.40479745 |
| H | 3.48049129  | 2.15823054   | -2.21081171 |
| H | 4.41795332  | 4.71653885   | -0.81739187 |
| H | 2.99314187  | 2.25195548   | 0.28137415  |
| H | 5.75906060  | 3.43423122   | 0.74024790  |
| H | 4.81121915  | 3.03771633   | -4.10827501 |
| H | 3.43986606  | 4.09587536   | -3.71542451 |
| H | 6.63844635  | -1.46272827  | -3.37590478 |
| H | 6.20395594  | 0.15566030   | -2.78336149 |
| H | 3.23928101  | -4.27964590  | -5.01531569 |
| H | 4.44855732  | -3.81132812  | -3.79579321 |
| H | -1.46012000 | -3.64081352  | -5.44148430 |
| H | -0.12788779 | -4.57562054  | -4.72230426 |
| H | -5.58336587 | -0.17105431  | -4.42113140 |
| H | -4.61017242 | -1.63614244  | -4.17729814 |
| H | -5.36438818 | 3.05204904   | -3.47421264 |
| H | -4.71445496 | 4.49860604   | -4.28145607 |
| H | -1.57711207 | 5.35264493   | -3.89922988 |
| H | -0.05032573 | 5.07293163   | -4.77150606 |
| H | 6.29436449  | 2.98493330   | 3.06352779  |
| H | 7.16549445  | 1.89771409   | 1.94631731  |
| H | 3.81214117  | -3.65206932  | 3.73338922  |
| H | 5.45355315  | -3.33540792  | 3.14591595  |
| H | 1.17956399  | -9.05912699  | 0.32163393  |
| H | 0.52149067  | -8.94832805  | -1.33500733 |
| H | -5.31869841 | -5.81508865  | 0.35613770  |
| H | -6.06543191 | -4.49969069  | -0.59547376 |
| H | -4.68237307 | 0.37708213   | 3.46843125  |
| H | -5.97648599 | -0.29215094  | 2.46626077  |
| H | -3.50824347 | 6.66878265   | 3.21510260  |
| H | -4.46647020 | 7.26899080   | 1.84714078  |
| H | 3.13080862  | 8.44737162   | 0.83369767  |
| H | 4.16422339  | 7.47533375   | -0.25256512 |
| H | -1.65281349 | 8.14278036   | 2.62736595  |
| H | -5.70187606 | 2.56872708   | 3.49679889  |
| H | -5.31288394 | -4.33007586  | 2.34839325  |
| H | -1.12695321 | -8.48346452  | 1.16960760  |
| H | 3.92761653  | -5.98030918  | 3.07891242  |
| H | 5.46415377  | 0.92803709   | 4.26632766  |
| H | 3.92055082  | 7.04761456   | 2.74775803  |
| H | -3.56106274 | 9.17717752   | 3.90959634  |
| H | -4.27104804 | 9.70284245   | 2.36690388  |
| H | -2.71056906 | 10.35211645  | 2.88738977  |
| H | 5.11307022  | 9.17395961   | 2.20778925  |
| H | 6.17430452  | 8.29199873   | 1.08494627  |
| H | 6.23859072  | 7.94401302   | 2.81690584  |
| H | 7.48907742  | 2.12208627   | 5.09202540  |
| H | 8.50741999  | 1.16024600   | 3.99504884  |
| H | 7.64972331  | 0.36809664   | 5.32146522  |
| H | 5.11957927  | -5.37601885  | 5.21869713  |
| H | 6.62910385  | -5.22033263  | 4.29352248  |
| H | 5.82770196  | -6.79334043  | 4.41878133  |
| H | -0.44075263 | -10.87686489 | 0.95826660  |
| H | -1.01400177 | -10.88786163 | -0.72575017 |
| H | -2.16654633 | -10.66618192 | 0.59548474  |
| H | -7.28030365 | -5.81851968  | 1.95774795  |
| H | -8.05207510 | -4.54275614  | 0.98774414  |

|   |             |             |             |
|---|-------------|-------------|-------------|
| H | -7.77239982 | -4.29192819 | 2.71620160  |
| H | -6.77599356 | 0.85143473  | 5.00237441  |
| H | -7.96156987 | 0.52285871  | 3.72060465  |
| H | -7.90814703 | 2.11790127  | 4.48748556  |
| H | 2.78987396  | 4.70639572  | 1.10405206  |
| H | 4.20128521  | 0.16367515  | 1.71366288  |
| H | 7.99715612  | -1.58425616 | -1.49695274 |
| H | 3.31533702  | -5.13230013 | 1.02633955  |
| H | 3.78865227  | -6.46268467 | -4.43635823 |
| H | -0.85033655 | -6.00328632 | -0.01496862 |
| H | -3.51352458 | -2.47888993 | 0.55366440  |
| H | -7.12728057 | -1.16682727 | -3.00804857 |
| H | -6.08032384 | 5.70427475  | -2.88207147 |
| H | -4.54088044 | 2.78019498  | 1.52572419  |
| H | -1.08052863 | 6.43747176  | 1.04315422  |
| H | 0.41709275  | 7.28545192  | -4.30722557 |
| H | 6.09118568  | 4.53877027  | -2.89089292 |
| H | -2.72844930 | -5.56141449 | -5.11544618 |
| H | -1.51959384 | 8.41982846  | 0.56019069  |
| H | 4.58763683  | 5.17061943  | 1.78925664  |
| H | 5.70383560  | -0.65632137 | 2.73542795  |
| H | 5.03752310  | -6.23305487 | 1.30967907  |
| H | -2.11569037 | -7.50153289 | -0.49313939 |
| H | -5.30345115 | -2.31335011 | 1.41888078  |
| H | -6.61639461 | 3.05914677  | 1.68715831  |

2-HP-B-CD:cis-(1S,4S)-SRT\_1\_MD E(Ha)= -7253.92643884

|    |               |               |               |
|----|---------------|---------------|---------------|
| C  | 0.6066472852  | 1.2332603942  | 3.2628487207  |
| C  | 0.2848272463  | 0.6330206038  | 1.9122278020  |
| C  | 0.6858839053  | -0.6712902394 | 1.5695498157  |
| C  | 1.5684313414  | -1.5123277968 | 2.4838559122  |
| C  | 1.5708026696  | -0.9867188888 | 3.9237572105  |
| C  | 1.7594762640  | 0.5199641683  | 3.9469100553  |
| C  | -0.4357218522 | 1.4084952417  | 0.9947988907  |
| C  | -0.7692736513 | 0.9119983930  | -0.2580428515 |
| C  | -0.3709249017 | -0.3788459564 | -0.6042967133 |
| C  | 0.3468471219  | -1.1526842191 | 0.2998397697  |
| C  | 1.2704651599  | -2.9981088940 | 2.4708033917  |
| C  | 2.2579806935  | -3.9224259538 | 2.1226762858  |
| C  | 2.0024861443  | -5.2877323498 | 2.1852719254  |
| C  | 0.7660854862  | -5.7588635075 | 2.6149392582  |
| C  | -0.2153984078 | -4.8377264248 | 2.9935523293  |
| C  | 0.0318278084  | -3.4733453987 | 2.9040712469  |
| Cl | 0.4828970329  | -7.4608161223 | 2.6830453209  |
| Cl | -1.7489908521 | -5.3672346188 | 3.6098617385  |
| N  | -0.6685440504 | 1.1929290634  | 4.0857951076  |
| C  | -0.5567177524 | 1.6607025663  | 5.4839638766  |
| O  | -3.7167169133 | 6.4895868197  | 0.3815405025  |
| C  | -2.6799309952 | 5.9384051036  | -0.3851276767 |
| C  | -1.7538785603 | 7.0552739807  | -0.8312734603 |
| C  | -0.7141823997 | 6.5136003282  | -1.8194616142 |
| O  | -1.3509393208 | 5.9149792775  | -2.9068790921 |
| C  | -2.1512992620 | 4.7766993134  | -2.5799707362 |
| C  | -3.2355232015 | 5.1554286590  | -1.5756666619 |
| O  | 0.0898039111  | 5.5611624584  | -1.1529172037 |
| C  | 1.3787106485  | 5.9684855030  | -0.7234445605 |
| C  | 1.5884396155  | 5.3636175281  | 0.6551137596  |
| C  | 3.0169095732  | 5.6161526043  | 1.1214911314  |
| C  | 3.9885070807  | 5.0900507668  | 0.0623738432  |
| O  | 3.7470411315  | 5.7341062301  | -1.1638487014 |
| C  | 2.4456035777  | 5.4781118806  | -1.7026491806 |
| O  | 3.2930275276  | 4.9686894913  | 2.3469111339  |
| C  | 3.0549672180  | 5.7402608049  | 3.5220037646  |
| C  | 2.2251344218  | 4.9622356374  | 4.5398963416  |
| O  | 1.0429928686  | 4.4278250744  | 3.9654499850  |
| O  | 0.6803376752  | 5.9200837483  | 1.6037702279  |
| C  | 2.3774405455  | 6.1978136383  | -3.0373565743 |
| O  | 2.3822944117  | 7.5988023381  | -2.8987700013 |
| O  | 3.7971172738  | 3.7125127242  | -0.0287403131 |
| C  | 4.9014993941  | 2.8126653185  | -0.0166412685 |
| C  | 5.1629889804  | 2.2555720325  | -1.4107103375 |
| O  | 6.0652409895  | 1.1565234813  | -1.3389563663 |
| C  | 5.5850106826  | 0.0727320987  | -0.5703549070 |
| C  | 5.4442350828  | 0.5350554568  | 0.8839216016  |
| C  | 4.4873925022  | 1.7124064294  | 0.9581834383  |
| C  | 5.8059928210  | 3.2262136587  | -2.3827184364 |
| O  | 6.0316825013  | 2.5984949921  | -3.6281763882 |
| O  | 4.4599102789  | 2.2088084359  | 2.2756412934  |
| O  | 4.9970045298  | -0.5288745206 | 1.6924199741  |
| C  | 5.8496483076  | -0.8884252817 | 2.7688223452  |
| C  | 5.4627084201  | -2.2966343680 | 3.1808667669  |
| O  | 5.5683912424  | -3.1714730800 | 2.0795455004  |
| O  | 4.3451071412  | -0.3869479176 | -1.0208921602 |

C 4.3783712047 -1.3655327840 -2.0575437296  
C 3.1852546125 -1.1232834622 -2.9889479637  
O 3.1047528478 -2.1682862617 -3.9583454175  
C 2.9134453692 -3.4415602733 -3.4168766933  
C 4.1061988782 -3.8041981471 -2.5369844163  
C 4.2842551837 -2.7570535484 -1.4491904139  
C 3.2676344201 0.1806358035 -3.7614757701  
O 4.5216211924 0.3309859434 -4.3664866854  
O 5.4574949189 -3.0221572722 -0.7027029170  
O 3.9255851485 -5.0566723232 -1.9006581559  
C 4.4228944891 -6.1646762587 -2.6559437002  
C 3.6747890526 -7.4342675140 -2.2804698996  
O 2.3435174528 -7.3890089622 -2.7446808211  
O 1.7568661068 -3.4837215523 -2.6145025309  
C 0.6844895288 -4.3170200259 -3.0270107536  
C 0.0680076018 -4.8032743680 -1.7211158926  
C -1.2438415780 -5.5200755660 -1.9754713550  
C -2.1317552754 -4.6066376573 -2.8403711372  
O -1.5077925985 -4.3083923964 -4.0506263999  
C -0.3030722327 -3.5506897257 -3.9053744840  
O -1.8678606073 -5.7754837959 -0.7354883538  
C -2.8212952989 -6.8374074107 -0.7630380809  
C -3.5269098824 -6.9160748220 0.5795700183  
O -4.2663561317 -5.7345183608 0.8315172415  
O 0.9708255763 -5.6461493932 -1.0353480717  
C 0.2195682647 -3.3029645039 -5.3104627027  
O 0.7212173509 -4.4675580033 -5.9209253417  
O -2.3633989165 -3.4065814357 -2.1245498838  
C -3.6089879941 -3.2353673757 -1.4706655294  
C -4.5051993482 -2.3131782599 -2.2927175766  
O -5.6923391275 -2.0175095217 -1.5491569858  
C -5.4589257117 -1.3590939623 -0.3354495501  
C -4.6110813220 -2.2466768729 0.5808746890  
C -3.3086953397 -2.6087368174 -0.1147992364  
C -4.9490980691 -2.9426079021 -3.5996218185  
O -5.5486784282 -4.2030727419 -3.4200350159  
O -2.5667091186 -3.4719698393 0.7223279932  
O -4.3716273390 -1.5422690908 1.8010877384  
C -4.2978623616 -2.3755677978 2.9647402134  
C -3.5454825454 -1.6207428635 4.0539444927  
O -2.3352304060 -1.0869111757 3.5036543292  
O -4.7639085928 -0.1529794871 -0.5153464874  
C -5.4553665817 1.0831280358 -0.4058743572  
C -4.6866424809 1.8914577096 0.6281767222  
C -5.2329766594 3.3067487941 0.6989772506  
C -5.1395069166 3.9148722239 -0.7072695159  
O -5.9190559522 3.1526437027 -1.5881462528  
C -5.5108049125 1.7946197769 -1.7598212481  
O -4.5020649461 4.1355414838 1.5827890849  
C -4.8053388358 4.0389370536 2.9714041057  
C -3.5332817508 3.7742904942 3.7676992223  
O -2.9200359191 2.5626292227 3.3431981682  
O -4.7822640681 1.2600081691 1.8970966928  
C -6.5555662923 1.1819389840 -2.6794756737  
O -7.8417932827 1.2708752990 -2.1189441301  
O -3.7960397415 3.9348899071 -1.0997669442  
O -1.1109340292 7.5768937229 0.3184326980  
C -0.7806360670 8.9624345858 0.2369047522

|   |               |               |               |
|---|---------------|---------------|---------------|
| C | 0.0209293479  | 9.3628786474  | 1.4649837445  |
| O | 1.2616238544  | 8.6839143516  | 1.5103142139  |
| C | -2.7102698225 | 4.2812644423  | -3.8997834432 |
| O | -1.6967889920 | 3.8449703527  | -4.7653490882 |
| C | 0.3111704719  | 10.8511776694 | 1.4521117017  |
| C | 2.9981002019  | 3.8281232905  | 5.1853797664  |
| C | 6.3381066484  | -2.8214718544 | 4.3012804314  |
| C | 4.3442816400  | -8.6459105390 | -2.9048176330 |
| C | -4.4965336045 | -8.0812866110 | 0.6058028748  |
| C | -4.3574866756 | -0.5343592129 | 4.7398529341  |
| C | -2.5227467900 | 4.8996793300  | 3.6522735995  |
| H | 3.2052003500  | 5.8456666498  | -3.6693166323 |
| H | 6.9001785353  | -0.8851769142 | 2.4411472498  |
| H | -2.4592015856 | -1.0421844731 | 2.5435060607  |
| H | -3.6319740942 | -5.0176312269 | 0.9906284587  |
| H | 1.8010189521  | -6.9131783984 | -2.0937150982 |
| H | 5.4072546476  | -2.6655985191 | 1.2647681416  |
| H | 0.7718394861  | 4.9934350899  | 3.2198116595  |
| H | 1.0770708658  | 7.7496869839  | 1.6932566189  |
| H | -3.5829295398 | 1.9959167939  | 2.8872452787  |
| H | 6.0506397181  | -3.8471145489 | 4.5445501324  |
| H | 7.3882152932  | -2.8296275318 | 3.9939105870  |
| H | 6.2365833988  | -2.2115771107 | 5.2042036928  |
| H | 2.3697244334  | 3.3126205690  | 5.9179735202  |
| H | 3.3344127807  | 3.1014066549  | 4.4411684041  |
| H | 3.8744823216  | 4.2134849369  | 5.7145127092  |
| H | 0.8917886602  | 11.1181021080 | 0.5637211393  |
| H | -0.6109034593 | 11.4389457962 | 1.4596172405  |
| H | 0.9004371568  | 11.1165536566 | 2.3323018162  |
| H | -1.5994804213 | 4.6493422736  | 4.1830580930  |
| H | -2.2755395578 | 5.0861319318  | 2.6039279874  |
| H | -2.9230428484 | 5.8223898243  | 4.0825853959  |
| H | -4.7380677210 | 0.2054017183  | 4.0327525665  |
| H | -5.2089363780 | -0.9767763971 | 5.2657979787  |
| H | -3.7402337036 | -0.0178846747 | 5.4808616103  |
| H | -5.2591495796 | -7.9623947479 | -0.1704936173 |
| H | -3.9811170111 | -9.0329399827 | 0.4492312387  |
| H | -5.0019181753 | -8.1158817330 | 1.5733127567  |
| H | 4.3488071137  | -8.5561725805 | -3.9958748393 |
| H | 5.3749762039  | -8.7637790505 | -2.5580790425 |
| H | 3.7816125967  | -9.5450457598 | -2.6457329984 |
| H | -3.2486671156 | -2.3668791317 | 4.8014895378  |
| H | -2.7596098750 | -7.0561395216 | 1.3558985088  |
| H | 3.7011751538  | -7.5310786935 | -1.1824382084 |
| H | 4.4147289867  | -2.2621949401 | 3.5305411010  |
| H | 1.9628500918  | 5.6933067779  | 5.3237142864  |
| H | -0.5830768512 | 9.1157526138  | 2.3533699689  |
| H | -3.8454684230 | 3.6771011510  | 4.8207545273  |
| H | -0.1794380547 | 9.1642583207  | -0.6613991754 |
| H | -1.7097199351 | 9.5455346135  | 0.1796049262  |
| H | 4.0158695806  | 6.0159105724  | 3.9770362483  |
| H | 2.5386984074  | 6.6694546061  | 3.2569305494  |
| H | 5.7419661037  | -0.1844541321 | 3.6052400338  |
| H | 4.2743288318  | -5.9921315031 | -3.7298515286 |
| H | 5.5007593395  | -6.2718416594 | -2.4667632008 |
| H | -3.5713908531 | -6.6624156275 | -1.5477593899 |
| H | -2.3000045069 | -7.7803101225 | -0.9789916453 |
| H | -5.3072312861 | -2.6337655665 | 3.3105000327  |

|   |               |               |               |
|---|---------------|---------------|---------------|
| H | -3.7586138356 | -3.2919829337 | 2.7133125610  |
| H | -5.2523228592 | 4.9834258372  | 3.3077887521  |
| H | -5.5317842310 | 3.2378712472  | 3.1405490981  |
| H | -0.0139287487 | -5.0837925507 | -6.0163347895 |
| H | 3.2203376209  | 7.8418339256  | -2.4881540949 |
| H | -1.1166714745 | 4.6024187558  | -4.9039957735 |
| H | -3.3711406541 | 3.4311969415  | -3.7088503519 |
| H | -3.3171397122 | 5.0855580298  | -4.3466012442 |
| H | -1.5117078861 | 3.9974236650  | -2.1447357826 |
| H | -4.0078235173 | 5.7646461298  | -2.0679498525 |
| H | -4.0527327279 | 5.7705875216  | 0.9422492085  |
| H | -2.0826463172 | 5.2239458771  | 0.2028945040  |
| H | -2.3462409885 | 7.8402874117  | -1.3209161694 |
| H | -0.0914795428 | 7.3157975053  | -2.2315534913 |
| H | -8.0267695212 | 2.2117280114  | -2.0143308915 |
| H | -6.4979449910 | 1.6772414949  | -3.6593403230 |
| H | -6.3383394328 | 0.1189015662  | -2.8162363117 |
| H | -4.5173701300 | 1.7483460706  | -2.2262218644 |
| H | -6.4844928835 | 0.9197373158  | -0.0579660787 |
| H | -4.6104029281 | 0.3043214649  | 1.7676338552  |
| H | -3.6342009792 | 1.9482307737  | 0.3202451332  |
| H | -6.2932447575 | 3.2847008174  | 0.9878688848  |
| H | -5.5677251163 | 4.9223794690  | -0.7155415278 |
| H | -6.3422551159 | -4.0715708352 | -2.8884527549 |
| H | -4.0683861676 | -3.0944798794 | -4.2307333630 |
| H | -5.6188652216 | -2.2415655661 | -4.1186925565 |
| H | -3.9560843935 | -1.3859886805 | -2.5071746805 |
| H | -4.1124169585 | -4.1983750370 | -1.3189976126 |
| H | -2.0557997863 | -4.0874127730 | 0.1630183475  |
| H | -2.7393133943 | -1.6838406943 | -0.2855196651 |
| H | -5.1812085612 | -3.1615663598 | 0.7877424373  |
| H | -6.4457159167 | -1.1765147870 | 0.1045668701  |
| H | 1.0467719279  | -2.5890912662 | -5.2612869442 |
| H | -0.5266114270 | -2.5840816896 | -3.4351344690 |
| H | 1.0685447962  | -5.1851145491 | -3.5783473959 |
| H | 1.8187158101  | -5.1712178725 | -1.0144039129 |
| H | -0.1485611036 | -3.9193153146 | -1.1034501447 |
| H | -1.0565494608 | -6.4606377091 | -2.5135843241 |
| H | -3.0834184993 | -5.0865691775 | -3.0940991525 |
| H | 4.7986906957  | 1.2573838921  | -4.2995898049 |
| H | 3.0360921767  | 0.9960633485  | -3.0633993923 |
| H | 2.4617788712  | 0.1600092207  | -4.5112766436 |
| H | 2.2642080953  | -1.1086118088 | -2.3888951615 |
| H | 5.2968895399  | -1.2628571268 | -2.6475006232 |
| H | 5.4291234523  | -3.9626148914 | -0.4778616734 |
| H | 3.4048172012  | -2.7787692381 | -0.7879448725 |
| H | 5.0117119287  | -3.8150879759 | -3.1592898464 |
| H | 2.8088508137  | -4.1212724916 | -4.2696893529 |
| H | 6.5807698553  | 1.8263104585  | -3.4325854968 |
| H | 6.7512104018  | 3.5951929122  | -1.9567473711 |
| H | 5.1518703493  | 4.0844852958  | -2.5521081303 |
| H | 4.2032703516  | 1.9165023905  | -1.8167827225 |
| H | 5.7983573336  | 3.3157476380  | 0.3753013444  |
| H | 3.9683090151  | 3.0477157068  | 2.2578621075  |
| H | 3.4924280524  | 1.3591529944  | 0.6450315409  |
| H | 6.4372815410  | 0.8714736524  | 1.2114012153  |
| H | 6.3461724474  | -0.7088074255 | -0.6510512784 |
| H | 1.4407433378  | 5.9293389317  | -3.5350058849 |

|   |               |               |               |
|---|---------------|---------------|---------------|
| H | 2.3118830157  | 4.4003136784  | -1.8654530176 |
| H | 1.4385980686  | 7.0614011554  | -0.6450983203 |
| H | -0.1015111921 | 6.2643903657  | 1.1214799102  |
| H | 1.4197814720  | 4.2803522146  | 0.5926791763  |
| H | 3.1795906699  | 6.6987564708  | 1.2133478198  |
| H | 5.0217667642  | 5.3327238100  | 0.3365760146  |
| H | -0.5891491782 | -2.8457484959 | -5.8987904699 |
| H | 2.3689636343  | -1.4844176321 | 4.4829572283  |
| H | 1.9012131718  | 0.8944062106  | 4.9651376865  |
| H | 2.6707047283  | 0.7944320760  | 3.4004670916  |
| H | 0.8365349903  | 2.3013835996  | 3.1754718400  |
| H | -1.0992688437 | 0.2519557775  | 4.0445956007  |
| H | -1.3901881680 | 1.8009807119  | 3.6364276758  |
| H | 0.0170710126  | 0.9505443525  | 6.0779959595  |
| H | -1.5646205536 | 1.7477822155  | 5.8926646264  |
| H | -0.0705990649 | 2.6383503135  | 5.4814499451  |
| H | 3.2538881915  | -3.5907665852 | 1.8353979810  |
| H | 2.7704464382  | -6.0037166650 | 1.9128662361  |
| H | -0.7561092988 | -2.7817892036 | 3.1866774473  |
| H | -0.7334525216 | 2.4178047932  | 1.2728711994  |
| H | -1.3206695103 | 1.5300380624  | -0.9609620646 |
| H | -0.6182509790 | -0.7865239904 | -1.5804814456 |
| H | 0.6677992137  | -2.1507577411 | 0.0168762947  |
| H | 2.5898434865  | -1.3841379358 | 2.0962812174  |
| H | 0.6321766831  | -1.2708412594 | 4.4204750236  |

2-HP-B-CD:cis-(1S,4S)-SRT\_2\_MD E(Ha)= -7253.92393253

|    |               |               |               |
|----|---------------|---------------|---------------|
| C  | 0.6174126695  | 1.1969753546  | 3.2513356556  |
| C  | 0.3445992839  | 0.6012523139  | 1.8887007311  |
| C  | 0.7418014247  | -0.7087851007 | 1.5642910781  |
| C  | 1.5669186955  | -1.5650689146 | 2.5172768586  |
| C  | 1.5321079903  | -1.0306775699 | 3.9538634182  |
| C  | 1.7386266815  | 0.4738040676  | 3.9763003122  |
| C  | -0.3207218868 | 1.3879006730  | 0.9396481838  |
| C  | -0.6034068151 | 0.8950664809  | -0.3270035978 |
| C  | -0.2088615612 | -0.4016957015 | -0.6551130800 |
| C  | 0.4556737351  | -1.1861000438 | 0.2801600025  |
| C  | 1.2236890114  | -3.0411783687 | 2.5002269271  |
| C  | 2.1889323999  | -3.9965768424 | 2.1785831368  |
| C  | 1.8843773566  | -5.3526845339 | 2.2269516543  |
| C  | 0.6193613700  | -5.7801059889 | 2.6182795413  |
| C  | -0.3453002798 | -4.8280205184 | 2.9663378084  |
| C  | -0.0450043229 | -3.4737843269 | 2.8924521876  |
| Cl | 0.2725692904  | -7.4761014833 | 2.6649198634  |
| CI | -1.9188215850 | -5.3065090687 | 3.5214954910  |
| N  | -0.6883718328 | 1.1653259812  | 4.0275439886  |
| C  | -0.6204488067 | 1.6323063194  | 5.4290187087  |
| O  | -3.6502004595 | 6.6296418664  | 0.2948497941  |
| C  | -2.5985493498 | 6.0607813268  | -0.4396207802 |
| C  | -1.6195445328 | 7.1571718172  | -0.8201016050 |
| C  | -0.5639370680 | 6.6127963312  | -1.7882248983 |
| O  | -1.1809504862 | 6.0645193888  | -2.9131842539 |
| C  | -2.0163820964 | 4.9370947930  | -2.6425956418 |
| C  | -3.1275102518 | 5.3159409997  | -1.6673065231 |
| O  | 0.1877819792  | 5.6194495335  | -1.1181697023 |
| C  | 1.4818626852  | 5.9788436610  | -0.6641393295 |
| C  | 1.6574257582  | 5.3411750745  | 0.7045542317  |
| C  | 3.0787727435  | 5.5765278904  | 1.1996483153  |
| C  | 4.0619124917  | 5.0475147141  | 0.1529751703  |
| O  | 3.8496235349  | 5.7035533743  | -1.0722570352 |
| C  | 2.5526853801  | 5.4798196340  | -1.6349106392 |
| O  | 3.3291918166  | 4.9174944806  | 2.4243872316  |
| C  | 3.0880150011  | 5.6851958936  | 3.6010785997  |
| C  | 2.2439014717  | 4.9057657705  | 4.6062193989  |
| O  | 1.0682009470  | 4.3765651896  | 4.0126708191  |
| O  | 0.7339609783  | 5.8829608473  | 1.6461451813  |
| C  | 2.5189771802  | 6.2172182890  | -2.9609422138 |
| O  | 2.5543220775  | 7.6159292333  | -2.8044962598 |
| O  | 3.8562380094  | 3.6727930169  | 0.0511434213  |
| C  | 4.9526735023  | 2.7630864327  | 0.0731223749  |
| C  | 5.2349221626  | 2.2152551708  | -1.3200566716 |
| O  | 6.1403441180  | 1.1198966491  | -1.2387857905 |
| C  | 5.6469921125  | 0.0297781838  | -0.4860141749 |
| C  | 5.4715362876  | 0.4793488002  | 0.9677589246  |
| C  | 4.5150949827  | 1.6573812265  | 1.0324983937  |
| C  | 5.8864108168  | 3.1918395783  | -2.2795530307 |
| O  | 6.1107047822  | 2.5752974328  | -3.5307737065 |
| O  | 4.4670260383  | 2.1455794839  | 2.3528688428  |
| O  | 5.0022377070  | -0.5914360213 | 1.7553027433  |
| C  | 5.8752292516  | -1.0090638698 | 2.7920749975  |
| C  | 5.4317799192  | -2.3963546915 | 3.2143754625  |
| O  | 5.4786318143  | -3.2883691181 | 2.1229807889  |
| O  | 4.4184094537  | -0.4285237527 | -0.9639877318 |



C 4.4801782618 -1.3940523377 -2.0120132223  
C 3.2835626560 -1.1637040560 -2.9422098423  
O 3.2162024152 -2.1972769438 -3.9234347682  
C 3.0621686871 -3.4862936557 -3.3928039474  
C 4.2964388041 -3.8144282425 -2.5546438469  
C 4.4209049499 -2.7982126497 -1.4314933655  
C 3.3418442736 0.1513184560 -3.6979971305  
O 4.5863363146 0.3267781939 -4.3171211484  
O 5.5898657747 -3.0506519532 -0.6714753854  
O 4.2442737049 -5.0910460246 -1.9640250386  
C 4.6715643406 -6.1467495968 -2.8168677415  
C 3.9614518565 -7.4235518009 -2.3982683087  
O 2.5706624665 -7.3002238282 -2.5844735492  
O 1.9220082778 -3.5647689081 -2.5758416601  
C 0.8388889880 -4.3645603836 -3.0099799257  
C 0.1089116582 -4.7868675906 -1.7447173827  
C -1.2302194136 -5.4277956586 -2.0725490511  
C -2.0463509470 -4.4833515771 -2.9570737405  
O -1.3399821371 -4.2329452973 -4.1300638912  
C -0.0879302053 -3.5624068126 -3.9403044446  
O -1.8672858186 -5.6768072122 -0.8320819549  
C -2.8772063319 -6.6872314685 -0.8777442641  
C -3.5937009334 -6.7365208033 0.4602041594  
O -4.2676113335 -5.5184629874 0.7163172381  
O 0.9238376992 -5.6625633889 -0.9999801167  
C 0.4843354838 -3.3698920223 -5.3354561812  
O 0.9189679825 -4.5762067905 -5.9150554277  
O -2.2628271500 -3.2695434646 -2.2563598016  
C -3.5274039360 -3.0730612793 -1.6475880424  
C -4.3923181762 -2.1489231737 -2.5041438723  
O -5.6030320271 -1.8459244252 -1.8020552920  
C -5.4134380526 -1.1889501261 -0.5793816795  
C -4.5993022326 -2.0831903800 0.3594879846  
C -3.2719744709 -2.4287997648 -0.2923924479  
C -4.7983539834 -2.7832267052 -3.8208242960  
O -5.4170665526 -4.0359493569 -3.6485489784  
O -2.5476949374 -3.2689764544 0.5860526107  
O -4.3946635863 -1.3983492764 1.5950305751  
C -4.4341848759 -2.2305652914 2.7595011905  
C -3.6631544544 -1.5347666411 3.8767734745  
O -2.4105810042 -1.0630733661 3.3683003946  
O -4.7107899282 0.0155426346 -0.7331886731  
C -5.3942751460 1.2538506075 -0.5988343723  
C -4.6207647883 2.0391876377 0.4497501403  
C -5.1650201304 3.4545479360 0.5487646836  
C -5.0644231135 4.0865334542 -0.8473373647  
O -5.8540542690 3.3448576279 -1.7378993473  
C -5.4483482715 1.9902506955 -1.9385707266  
O -4.4402327008 4.2666356369 1.4532115509  
C -4.7137773774 4.1019160721 2.8416402069  
C -3.4228671441 3.8062298736 3.6009846121  
O -2.7808719822 2.6565650427 3.0603543500  
O -4.7148788923 1.3851916832 1.7070644103  
C -6.4936729334 1.3955414328 -2.8690026780  
O -7.7792592765 1.4669170622 -2.3038273239  
O -3.7224838323 4.0924554042 -1.2449277606  
O -1.0004594893 7.6177786075 0.3680376169  
C -0.6381418692 8.9972309359 0.3520508510

|   |               |               |               |
|---|---------------|---------------|---------------|
| C | 0.1259151562  | 9.3335398080  | 1.6219679007  |
| O | 1.3549617688  | 8.6347439044  | 1.6814334670  |
| C | -2.5390896144 | 4.4844933201  | -3.9924760939 |
| O | -1.5056328363 | 4.0457926423  | -4.8327134753 |
| C | 0.4362393496  | 10.8165303667 | 1.6836491913  |
| C | 3.0051979235  | 3.7664862145  | 5.2563673205  |
| C | 6.2972326158  | -2.9515081608 | 4.3290028732  |
| C | 4.4369514853  | -8.6045765072 | -3.2228471802 |
| C | -4.6246219473 | -7.8478117418 | 0.4752175774  |
| C | -4.4271056382 | -0.4068853896 | 4.5492288456  |
| C | -2.4477542260 | 4.9672329710  | 3.5668984044  |
| H | 3.3460639053  | 5.8536567123  | -3.5871160098 |
| H | 6.9116058539  | -1.0591362211 | 2.4248133606  |
| H | -2.4529890856 | -1.1178453675 | 2.4016669872  |
| H | -3.5976804180 | -4.8271928619 | 0.8440671270  |
| H | 2.2149855270  | -6.6788925110 | -1.9287068381 |
| H | 5.3853454315  | -2.7888520765 | 1.2932074440  |
| H | 0.8120503701  | 4.9431310316  | 3.2627374822  |
| H | 1.1504315152  | 7.6954420218  | 1.8101303003  |
| H | -3.4581376134 | 2.0754903838  | 2.6430855856  |
| H | 5.9718765928  | -3.9643734501 | 4.5780158394  |
| H | 7.3433073144  | -3.0026126045 | 4.0119827531  |
| H | 6.2288321535  | -2.3353872740 | 5.2308645498  |
| H | 2.3675082726  | 3.2513471873  | 5.9812389843  |
| H | 3.3461205964  | 3.0406741199  | 4.5134029975  |
| H | 3.8776423743  | 4.1466413539  | 5.7957245612  |
| H | 1.0477036788  | 11.1144146694 | 0.8262939042  |
| H | -0.4777245579 | 11.4168949712 | 1.6895003251  |
| H | 1.0012215202  | 11.0343685143 | 2.5924021648  |
| H | -1.5002292337 | 4.6951055411  | 4.0407360989  |
| H | -2.2458139997 | 5.2694489691  | 2.5358719712  |
| H | -2.8609337391 | 5.8276403753  | 4.1015191789  |
| H | -4.7586944531 | 0.3493729309  | 3.8346091398  |
| H | -5.3073979743 | -0.8037386570 | 5.0639214065  |
| H | -3.7956944551 | 0.0778069243  | 5.3000694068  |
| H | -5.3758401339 | -7.6861362676 | -0.3044277499 |
| H | -4.1596876918 | -8.8249731153 | 0.3179019941  |
| H | -5.1362901914 | -7.8596314631 | 1.4399599267  |
| H | 4.2176971877  | -8.4395639311 | -4.2825484645 |
| H | 5.5124854508  | -8.7675418859 | -3.1077418563 |
| H | 3.9120998309  | -9.5092765764 | -2.9081883176 |
| H | -3.4364043558 | -2.3043463712 | 4.6257351992  |
| H | -2.8404053387 | -6.9248737902 | 1.2408152815  |
| H | 4.1952251407  | -7.6051259150 | -1.3353753242 |
| H | 4.3918672978  | -2.3101426439 | 3.5795692842  |
| H | 1.9724262847  | 5.6338575017  | 5.3894703906  |
| H | -0.5123009028 | 9.0577521308  | 2.4774905857  |
| H | -3.7176546923 | 3.6125301080  | 4.6460977084  |
| H | -0.0015029056 | 9.2203513880  | -0.5165208830 |
| H | -1.5520041418 | 9.6030984620  | 0.2847846849  |
| H | 4.0469715237  | 5.9512406871  | 4.0658678563  |
| H | 2.5808174759  | 6.6198885825  | 3.3374746264  |
| H | 5.8372976958  | -0.3075759160 | 3.6371820496  |
| H | 4.4062358151  | -5.9339688487 | -3.8611527067 |
| H | 5.7644652842  | -6.2590931798 | -2.7551570514 |
| H | -3.6069274717 | -6.4578091720 | -1.6666418863 |
| H | -2.4090315728 | -7.6554254409 | -1.1033899453 |
| H | -5.4730278779 | -2.4045575034 | 3.0682269399  |

|   |               |               |               |
|---|---------------|---------------|---------------|
| H | -3.9659817672 | -3.1910679762 | 2.5291507562  |
| H | -5.1551636577 | 5.0280103598  | 3.2317498257  |
| H | -5.4345535399 | 3.2914382997  | 2.9857242402  |
| H | 0.1462168983  | -5.1442441506 | -6.0117711639 |
| H | 3.3956375464  | 7.8356107254  | -2.3875957108 |
| H | -0.9092607355 | 4.7954772805  | -4.9409841075 |
| H | -3.2238348382 | 3.6448062588  | -3.8446997027 |
| H | -3.1135742010 | 5.3113054134  | -4.4411389469 |
| H | -1.4090242546 | 4.1340717684  | -2.2049668900 |
| H | -3.8715271471 | 5.9507282537  | -2.1710412517 |
| H | -4.0076039107 | 5.9169827726  | 0.8500970214  |
| H | -2.0530950674 | 5.3160007947  | 0.1599521427  |
| H | -2.1678461918 | 7.9771386069  | -1.3036318126 |
| H | 0.0965635614  | 7.4060760591  | -2.1560750111 |
| H | -7.9683099060 | 2.4045361069  | -2.1792871728 |
| H | -6.4402659752 | 1.9132792219  | -3.8373345458 |
| H | -6.2727999371 | 0.3366212824  | -3.0318768160 |
| H | -4.4557032031 | 1.9525017993  | -2.4068557988 |
| H | -6.4236918430 | 1.0894918052  | -0.2524210298 |
| H | -4.5555033562 | 0.4288340224  | 1.5636709802  |
| H | -3.5690654477 | 2.1009834660  | 0.1410368384  |
| H | -6.2268034621 | 3.4274510605  | 0.8323498211  |
| H | -5.4799459150 | 5.0992819343  | -0.8407017226 |
| H | -6.2259088174 | -3.8886812081 | -3.1447744216 |
| H | -3.8997715691 | -2.9483047203 | -4.4228982438 |
| H | -5.4442871508 | -2.0800617912 | -4.3662436152 |
| H | -3.8326587206 | -1.2250303562 | -2.7042113176 |
| H | -4.0476833541 | -4.0275707568 | -1.5001671452 |
| H | -1.9773116856 | -3.8466382900 | 0.0501414371  |
| H | -2.7075010398 | -1.5000364520 | -0.4563617726 |
| H | -5.1709764724 | -3.0033671452 | 0.5348714281  |
| H | -6.4151830706 | -1.0061372368 | -0.1751188795 |
| H | 1.3517194562  | -2.7071886891 | -5.2820657921 |
| H | -0.2649639720 | -2.5767106326 | -3.4898411266 |
| H | 1.2062158620  | -5.2617244796 | -3.5257011980 |
| H | 0.3748422795  | -6.0340581897 | -0.2974840226 |
| H | -0.0900156356 | -3.8744521642 | -1.1615905734 |
| H | -1.0639253465 | -6.3706637826 | -2.6130904878 |
| H | -3.0048062413 | -4.9190270356 | -3.2610002863 |
| H | 4.8603807171  | 1.2519447724  | -4.2280804038 |
| H | 3.1083939926  | 0.9543373802  | -2.9862423866 |
| H | 2.5282302868  | 0.1314858206  | -4.4394988809 |
| H | 2.3650094147  | -1.1709682183 | -2.3382373060 |
| H | 5.3987438814  | -1.2602608040 | -2.5958300021 |
| H | 5.6084030761  | -4.0098699283 | -0.5383623104 |
| H | 3.5322333547  | -2.8761962810 | -0.7881595352 |
| H | 5.1771716438  | -3.7246958862 | -3.2092723463 |
| H | 2.9627091059  | -4.1554425641 | -4.2546098660 |
| H | 6.6503131836  | 1.7948695841  | -3.3418957603 |
| H | 6.8326823018  | 3.5504671902  | -1.8470075183 |
| H | 5.2382870174  | 4.0559050924  | -2.4419446599 |
| H | 4.2827931762  | 1.8740866311  | -1.7421481786 |
| H | 5.8469392494  | 3.2552767703  | 0.4843033044  |
| H | 3.9852320705  | 2.9898613631  | 2.3308039265  |
| H | 3.5243753522  | 1.3101011713  | 0.6997275979  |
| H | 6.4550865432  | 0.8139789385  | 1.3240801970  |
| H | 6.4114142120  | -0.7494627586 | -0.5564961393 |
| H | 1.5819583132  | 5.9761325004  | -3.4717929217 |

|   |               |               |               |
|---|---------------|---------------|---------------|
| H | 2.4003513039  | 4.4070505828  | -1.8149990924 |
| H | 1.5705726132  | 7.0679464615  | -0.5608940879 |
| H | -0.0357052446 | 6.2393011615  | 1.1538568857  |
| H | 1.4841320422  | 4.2603794003  | 0.6162694161  |
| H | 3.2496368940  | 6.6568199183  | 1.3031573795  |
| H | 5.0930215326  | 5.2765392962  | 0.4461727092  |
| H | -0.2837758035 | -2.8742098549 | -5.9468033105 |
| H | 2.3061405196  | -1.5354008558 | 4.5402616706  |
| H | 1.8503308584  | 0.8512018083  | 4.9971084048  |
| H | 2.6707474812  | 0.7358360361  | 3.4592767930  |
| H | 0.8586171176  | 2.2631924617  | 3.1753116440  |
| H | -1.1229393646 | 0.2283337191  | 3.9673255455  |
| H | -1.3872496366 | 1.7848970070  | 3.5511801689  |
| H | -0.0674747383 | 0.9222203741  | 6.0426102749  |
| H | -1.6397624708 | 1.7222662030  | 5.8082723110  |
| H | -0.1324934759 | 2.6090676674  | 5.4407848303  |
| H | 3.2018157967  | -3.6994203813 | 1.9127194505  |
| H | 2.6355009477  | -6.0916271147 | 1.9697006437  |
| H | -0.8165108163 | -2.7564510642 | 3.1550001980  |
| H | -0.6195650872 | 2.3999087768  | 1.2063197644  |
| H | -1.1111603600 | 1.5204921799  | -1.0556895676 |
| H | -0.4148645579 | -0.8047787914 | -1.6426890911 |
| H | 0.7815999394  | -2.1864122493 | 0.0092923458  |
| H | 2.6046243277  | -1.4703812077 | 2.1653118281  |
| H | 0.5753253702  | -1.2994076144 | 4.4248230356  |

2-HP-B-CD:cis-(1S,4S)-SRT\_3\_MD E(Ha)= -7253.92257350

|    |               |               |               |
|----|---------------|---------------|---------------|
| C  | 0.5882002370  | 1.3362646212  | 3.1247637723  |
| C  | 0.2455861617  | 0.6415334393  | 1.8252491192  |
| C  | 0.6155606353  | -0.6941862365 | 1.5856541434  |
| C  | 1.4637428669  | -1.4898830871 | 2.5687919300  |
| C  | 1.4765590248  | -0.8534982709 | 3.9625292181  |
| C  | 1.7203272421  | 0.6429534936  | 3.8629276422  |
| C  | -0.4504285999 | 1.3622801478  | 0.8460077337  |
| C  | -0.7847002321 | 0.7809127234  | -0.3697703215 |
| C  | -0.4139222494 | -0.5407804054 | -0.6151266919 |
| C  | 0.2754847028  | -1.2611665438 | 0.3522902359  |
| C  | 1.1087639933  | -2.9598076304 | 2.6731021510  |
| C  | 2.0672623823  | -3.9469464378 | 2.4336380074  |
| C  | 1.7601396137  | -5.2904308704 | 2.6191081961  |
| C  | 0.5006832841  | -5.6744323299 | 3.0677632783  |
| C  | -0.4541795512 | -4.6881280859 | 3.3335996709  |
| C  | -0.1562861444 | -3.3481591678 | 3.1176139209  |
| Cl | 0.1557773859  | -7.3504651668 | 3.2987990969  |
| CI | -2.0143142354 | -5.1035541012 | 3.9694106429  |
| N  | -0.6813696071 | 1.4030124459  | 3.9554724797  |
| C  | -0.5383081239 | 1.9898732967  | 5.3055363570  |
| O  | -3.4820665387 | 6.5427843310  | -0.1773019268 |
| C  | -2.4471539738 | 5.9127509582  | -0.8838774587 |
| C  | -1.4823161707 | 6.9724701350  | -1.3818569530 |
| C  | -0.4403803731 | 6.3402264811  | -2.3082286375 |
| O  | -1.0722588265 | 5.6941698063  | -3.3718588140 |
| C  | -1.9073562703 | 4.5988144793  | -2.9882313275 |
| C  | -3.0000243204 | 5.0658817548  | -2.0311693068 |
| O  | 0.3146917638  | 5.4052888487  | -1.5642830744 |
| C  | 1.6192437246  | 5.7783597179  | -1.1553331668 |
| C  | 1.7898140420  | 5.2697105752  | 0.2687153858  |
| C  | 3.2294488260  | 5.4701265250  | 0.7295354155  |
| C  | 4.1741145201  | 4.8207046786  | -0.2841640546 |
| O  | 3.9699745813  | 5.3920139852  | -1.5537836632 |
| C  | 2.6606824957  | 5.1505559176  | -2.0813104157 |
| O  | 3.4649948468  | 4.8892202307  | 1.9958324151  |
| C  | 3.2541599286  | 5.7457032937  | 3.1155824270  |
| C  | 2.3764006712  | 5.0730810945  | 4.1659564555  |
| O  | 1.1747198970  | 4.5675029151  | 3.6062100923  |
| O  | 0.9183383851  | 5.9548239152  | 1.1656170776  |
| C  | 2.6358683640  | 5.7401347479  | -3.4777656927 |
| O  | 2.7415287333  | 7.1434799756  | -3.4744614040 |
| O  | 3.9055470964  | 3.4541220132  | -0.2769416402 |
| C  | 4.9578672202  | 2.4938855449  | -0.2806192935 |
| C  | 5.1075035208  | 1.8353054564  | -1.6499997874 |
| O  | 5.9691100740  | 0.7102468770  | -1.5593532946 |
| C  | 5.5273928372  | -0.3025380711 | -0.6830822454 |
| C  | 5.4436843766  | 0.2598400646  | 0.7407879053  |
| C  | 4.5315031508  | 1.4724986975  | 0.7685153737  |
| C  | 5.6998024579  | 2.7420556280  | -2.7041643283 |
| O  | 5.4243428314  | 2.1691853742  | -3.9723110512 |
| O  | 4.5494652322  | 2.0494204597  | 2.0534326420  |
| O  | 4.9851954984  | -0.7399670317 | 1.6188279058  |
| C  | 5.7790408469  | -0.9675114325 | 2.7724183178  |
| C  | 5.3272369708  | -2.3001562940 | 3.3416591998  |
| O  | 5.4011142795  | -3.3013822451 | 2.3511769387  |
| O  | 4.2807398806  | -0.8128051642 | -1.0494598486 |

C 4.3082266755 -1.8925218571 -1.9833375379  
C 3.1855968463 -1.6826294716 -3.0014679070  
O 3.0277520673 -2.8417780621 -3.8251979452  
C 2.7609217175 -4.0246757527 -3.1368197129  
C 3.9215872188 -4.3478355415 -2.2028334094  
C 4.1282136422 -3.2011701576 -1.2297034192  
C 3.4531520719 -0.5227792116 -3.9518402004  
O 4.7601860551 -0.5396018571 -4.4546962154  
O 5.2745340462 -3.4387281665 -0.4337069780  
O 3.6748373351 -5.5213742514 -1.4461251157  
C 4.1328771515 -6.7187070147 -2.0808762224  
C 3.3518597953 -7.9205433515 -1.5709238882  
O 2.0221950147 -7.8935460745 -2.0385972475  
O 1.5964735846 -3.9107793503 -2.3497815005  
C 0.4887430424 -4.7344698057 -2.6766385088  
C -0.1381191023 -5.0789299442 -1.3327225259  
C -1.4694409427 -5.7755979693 -1.5276977973  
C -2.3310101915 -4.9138705741 -2.4633807404  
O -1.7069437566 -4.7391736678 -3.6982976901  
C -0.4709354116 -4.0191596351 -3.6257004530  
O -2.1057809115 -5.9090092965 -0.2745540846  
C -3.0287767374 -6.9940644048 -0.2055684452  
C -3.8000899759 -6.9246293685 1.1012274026  
O -4.5614178178 -5.7340328868 1.1823378198  
O 0.7380073982 -5.8851050265 -0.5729504911  
C 0.0536136676 -3.9550019896 -5.0504209695  
O 0.4091168284 -5.2256927910 -5.5386208915  
O -2.5177213602 -3.6520506885 -1.8517578594  
C -3.7738483507 -3.3630655927 -1.2652153254  
C -4.5741055126 -2.4514705380 -2.1912442373  
O -5.7621154522 -2.0058105475 -1.5282056676  
C -5.5328806370 -1.2793095750 -0.3545453633  
C -4.7738743485 -2.1422904528 0.6608132592  
C -3.4794173408 -2.6524185668 0.0481636621  
C -5.0192188875 -3.1523594072 -3.4615733480  
O -5.7384314687 -4.3334318075 -3.2027179779  
O -2.8311231379 -3.4909431252 0.9806110656  
O -4.5197669014 -1.3495029347 1.8218220001  
C -4.5087382180 -2.0760592993 3.0570546456  
C -3.7462384382 -1.2539031289 4.0905084862  
O -2.5108491343 -0.8073443491 3.5199105143  
O -4.7603628671 -0.1305380450 -0.5878967223  
C -5.3831354985 1.1471156706 -0.6106991312  
C -4.5961938456 1.9992362579 0.3692278170  
C -5.0946191557 3.4319805482 0.3209792683  
C -4.9505768720 3.9312264869 -1.1253717665  
O -5.7250117548 3.1253470481 -1.9724061982  
C -5.3623997252 1.7427272705 -2.0182939448  
O -4.3604721800 4.3015936590 1.1613679488  
C -4.6732322456 4.2825898614 2.5514884084  
C -3.4076810816 4.0375715597 3.3661032701  
O -2.7993573021 2.8117008610 2.9743042574  
O -4.7299899785 1.4716749010 1.6814733379  
C -6.3944579313 1.0960892639 -2.9283844987  
O -7.6946648474 1.2538850843 -2.4171407881  
O -3.5985754340 3.8928379228 -1.4858752300  
O -0.8419988932 7.5516081325 -0.2585714274  
C -0.5014606479 8.9273138229 -0.4184443057

|   |               |                |               |
|---|---------------|----------------|---------------|
| C | 0.3456171318  | 9.3795875504   | 0.7598815787  |
| O | 1.5751664342  | 8.6814185501   | 0.8025889277  |
| C | -2.4515828906 | 4.0308637245   | -4.2852113370 |
| O | -1.4285070653 | 3.5308053097   | -5.1034335991 |
| C | 0.6571476347  | 10.8600205415  | 0.6557305015  |
| C | 3.0863830821  | 3.9425467410   | 4.8861136834  |
| C | 6.1652561644  | -2.7295878235  | 4.5293352709  |
| C | 3.9891054450  | -9.2086789012  | -2.0624605594 |
| C | -4.7597957849 | -8.0935933407  | 1.2134851598  |
| C | -4.5358720380 | -0.0888782032  | 4.6640534946  |
| C | -2.3904854156 | 5.1531779047   | 3.2217697562  |
| H | 3.4324773806  | 5.2668028980   | -4.0702029147 |
| H | 6.8427008523  | -1.0298025781  | 2.4953787657  |
| H | -2.6074563160 | -0.8735100926  | 2.5580874193  |
| H | -3.9425298433 | -4.9969619044  | 1.3055402896  |
| H | 1.5000188288  | -7.3099722657  | -1.4627732843 |
| H | 5.2687228171  | -2.8864468960  | 1.4806315635  |
| H | 0.9409238551  | 5.1051902817   | 2.8281211025  |
| H | 1.3801139873  | 7.7678024376   | 1.0623073849  |
| H | -3.4830860670 | 2.2175838231   | 2.5878856218  |
| H | 5.8199679646  | -3.7005950937  | 4.8920847688  |
| H | 7.2149946711  | -2.8320393672  | 4.2383316815  |
| H | 6.0921914114  | -2.0086559691  | 5.3495164759  |
| H | 2.4226004091  | 3.4920995722   | 5.6301583145  |
| H | 3.4073056111  | 3.1647115812   | 4.1886235066  |
| H | 3.9670830813  | 4.3189552361   | 5.4145934574  |
| H | 1.2134429599  | 11.0683659373  | -0.2634151189 |
| H | -0.2556624369 | 11.4622326359  | 0.6581011454  |
| H | 1.2772952204  | 11.1642131348  | 1.5014726684  |
| H | -1.4656679423 | 4.9094561955   | 3.7529185802  |
| H | -2.1490793364 | 5.3169555300   | 2.1686461920  |
| H | -2.7843773758 | 6.0864639485   | 3.6346982336  |
| H | -4.8919105218 | 0.5931419349   | 3.8883154439  |
| H | -5.4034817546 | -0.4613201956  | 5.2174155125  |
| H | -3.9154629055 | 0.4770928311   | 5.3655365350  |
| H | -5.4885581126 | -8.0683432490  | 0.3971605644  |
| H | -4.2298639657 | -9.0497174389  | 1.1827725057  |
| H | -5.3063307730 | -8.0302394144  | 2.1568684503  |
| H | 3.9913563018  | -9.2361349644  | -3.1567687676 |
| H | 5.0180320586  | -9.3134802077  | -1.7064427210 |
| H | 3.4060716126  | -10.0608955273 | -1.7075468808 |
| H | -3.4881916225 | -1.9408355467  | 4.9059937917  |
| H | -3.0709013641 | -6.9677247930  | 1.9242643083  |
| H | 3.3788052523  | -7.9013172688  | -0.4685296068 |
| H | 4.2786572563  | -2.1781069461  | 3.6699544820  |
| H | 2.1425619367  | 5.8595626659   | 4.9038509128  |
| H | -0.2327139526 | 9.1923552781   | 1.6796525260  |
| H | -3.7254392552 | 3.9732624245   | 4.4201331920  |
| H | 0.0717882883  | 9.0770115113   | -1.3447565180 |
| H | -1.4256233893 | 9.5182688019   | -0.4759577034 |
| H | 4.2224150117  | 6.0036263990   | 3.5654932518  |
| H | 2.7852585721  | 6.6791401778   | 2.7859267844  |
| H | 5.6522389644  | -0.1552908088  | 3.5004579386  |
| H | 3.9806981091  | -6.6568982513  | -3.1662546483 |
| H | 5.2086172377  | -6.8358921979  | -1.8859179660 |
| H | -3.7428659420 | -6.9515791070  | -1.0412336449 |
| H | -2.4727444172 | -7.9397391222  | -0.2704587452 |
| H | -5.5356730332 | -2.2581715051  | 3.3995352079  |

|   |               |               |               |
|---|---------------|---------------|---------------|
| H | -4.0048309333 | -3.0327081292 | 2.9031919635  |
| H | -5.1065185819 | 5.2505902361  | 2.8347614645  |
| H | -5.4129536663 | 3.5027582218  | 2.7560062860  |
| H | -0.3891726251 | -5.7664376046 | -5.5186395378 |
| H | 3.5821353588  | 7.3633637466  | -3.0559731975 |
| H | -0.8395631790 | 4.2728695037  | -5.2818568092 |
| H | -3.1258915806 | 3.2014167546  | -4.0551146658 |
| H | -3.0401447784 | 4.8137313871  | -4.7909581182 |
| H | -1.2952655003 | 3.8359217829  | -2.4897804408 |
| H | -3.7497589605 | 5.6587118698  | -2.5755999412 |
| H | -3.8500784928 | 5.8757175754  | 0.4260554801  |
| H | -1.8789496194 | 5.2249787057  | -0.2385282026 |
| H | -2.0418058357 | 7.7380256505  | -1.9361134832 |
| H | 0.2187055172  | 7.0948873177  | -2.7520126680 |
| H | -7.8630419472 | 2.2032547404  | -2.3919113520 |
| H | -6.2924344431 | 1.5240233642  | -3.9359514555 |
| H | -6.2031153945 | 0.0214851726  | -2.9876812261 |
| H | -4.3540652950 | 1.6246570881  | -2.4385525891 |
| H | -6.4283453078 | 1.0718060333  | -0.2806690098 |
| H | -4.6173150741 | 0.4998355220  | 1.6274884029  |
| H | -3.5388231991 | 1.9924667559  | 0.0751282286  |
| H | -6.1618444541 | 3.4632159698  | 0.5829286655  |
| H | -5.3536281808 | 4.9449952588  | -1.2174691303 |
| H | -6.5334006138 | -4.0824841180 | -2.7180153918 |
| H | -4.1318997012 | -3.4347709193 | -4.0362671850 |
| H | -5.6020578548 | -2.4442517483 | -4.0689494401 |
| H | -3.9479113368 | -1.5878539212 | -2.4568287658 |
| H | -4.3370918922 | -4.2835916127 | -1.0650196327 |
| H | -2.3019550457 | -4.1518535650 | 0.4938040579  |
| H | -2.8426278859 | -1.7838627847 | -0.1743858478 |
| H | -5.4136791354 | -2.9930717777 | 0.9289088766  |
| H | -6.5220464036 | -1.0076716338 | 0.0309006055  |
| H | 0.9550564481  | -3.3359708450 | -5.0754047555 |
| H | -0.6562891109 | -3.0023903211 | -3.2557077785 |
| H | 0.8350472390  | -5.6638597173 | -3.1471207825 |
| H | 1.6054726033  | -5.4456102123 | -0.6011188794 |
| H | -0.3303388099 | -4.1407796159 | -0.7941565937 |
| H | -1.3066146487 | -6.7618569116 | -1.9850480468 |
| H | -3.3002328771 | -5.3823299095 | -2.6681951168 |
| H | 5.1705761129  | 0.3086525610  | -4.2260399528 |
| H | 3.2276324480  | 0.4130629338  | -3.4276120672 |
| H | 2.7269591255  | -0.6167228885 | -4.7722918452 |
| H | 2.2467208365  | -1.4931105966 | -2.4617153191 |
| H | 5.2592103471  | -1.8980316830 | -2.5289754582 |
| H | 5.2072960525  | -4.3542251264 | -0.1286614507 |
| H | 3.2358649441  | -3.1090809965 | -0.5932540081 |
| H | 4.8353072636  | -4.4660896410 | -2.8017810531 |
| H | 2.6253955113  | -4.7972621558 | -3.9022476989 |
| H | 6.0059950992  | 2.5611281611  | -4.6302568579 |
| H | 6.7803155824  | 2.8185339080  | -2.5209070423 |
| H | 5.2539130658  | 3.7415862035  | -2.6225739975 |
| H | 4.1030571000  | 1.5267834852  | -1.9708469803 |
| H | 5.9020712519  | 2.9641726893  | 0.0333232911  |
| H | 4.0942320481  | 2.9063380329  | 1.9876285787  |
| H | 3.5176456708  | 1.1364114931  | 0.4998043941  |
| H | 6.4584509640  | 0.5764438919  | 1.0203349811  |
| H | 6.2934374514  | -1.0826046326 | -0.7316055016 |
| H | 1.6796474677  | 5.4910600965  | -3.9476071895 |



|   |               |               |               |
|---|---------------|---------------|---------------|
| H | 2.4765539976  | 4.0698378056  | -2.1419534551 |
| H | 1.7373556439  | 6.8695816415  | -1.1601619301 |
| H | 0.1367686100  | 6.2705962759  | 0.6644796528  |
| H | 1.5599370804  | 4.1962151785  | 0.2870222925  |
| H | 3.4537780135  | 6.5458977158  | 0.7515306662  |
| H | 5.2189041584  | 5.0245431344  | -0.0214472458 |
| H | -0.7098500748 | -3.4723953239 | -5.6780713770 |
| H | 2.2532172384  | -1.3319974712 | 4.5670622726  |
| H | 1.8787660464  | 1.0937171828  | 4.8470016825  |
| H | 2.6387813419  | 0.8332961631  | 3.2921990808  |
| H | 0.8517553339  | 2.3857329527  | 2.9518230689  |
| H | -1.1382352982 | 0.4764507011  | 3.9988437231  |
| H | -1.3901379714 | 1.9934183759  | 3.4571736405  |
| H | 0.0091152597  | 1.3125997130  | 5.9598838153  |
| H | -1.5373510955 | 2.1587012143  | 5.7106363046  |
| H | -0.0098220568 | 2.9401399740  | 5.2083256654  |
| H | 3.0799745649  | -3.6784883696 | 2.1388451566  |
| H | 2.5054680819  | -6.0552848283 | 2.4294948235  |
| H | -0.9265808717 | -2.6080464427 | 3.3129141714  |
| H | -0.7320654710 | 2.3938130058  | 1.0482010569  |
| H | -1.3144659957 | 1.3576521337  | -1.1227487023 |
| H | -0.6575793959 | -1.0134126235 | -1.5625043729 |
| H | 0.5747232772  | -2.2846644430 | 0.1479127299  |
| H | 2.4911700418  | -1.4288104873 | 2.1805881914  |
| H | 0.5252981513  | -1.0650719085 | 4.4710355408  |

255

2-HP-B-CD:cis-(1S,4S)-SRT\_4\_MD E(Ha)= -7253.9086235598

|    |             |             |             |
|----|-------------|-------------|-------------|
| C  | 0.00933468  | 0.81781245  | -5.54393047 |
| C  | -0.94354527 | -0.27109226 | -5.12761510 |
| C  | -0.77706323 | -0.94010619 | -3.90452217 |
| C  | 0.47434698  | -0.76624699 | -3.04859422 |
| C  | 1.32191461  | 0.44867553  | -3.44852179 |
| C  | 1.39762327  | 0.62107059  | -4.95695184 |
| C  | -2.01981603 | -0.58631556 | -5.96433260 |
| C  | -2.95513544 | -1.54005862 | -5.59376731 |
| C  | -2.80953026 | -2.19785919 | -4.37430088 |
| C  | -1.72768934 | -1.90319242 | -3.55161917 |
| C  | 0.23576752  | -0.77025012 | -1.54725513 |
| C  | 0.68240516  | -1.83006795 | -0.75694181 |
| C  | 0.51838619  | -1.82685422 | 0.62421270  |
| C  | -0.06529779 | -0.73641334 | 1.26007170  |
| C  | -0.47409986 | 0.35382026  | 0.48299002  |
| C  | -0.35693869 | 0.31917275  | -0.90374825 |
| Cl | -0.28577098 | -0.75494237 | 2.96924968  |
| Cl | -1.09834092 | 1.78101016  | 1.23694154  |
| N  | -0.56955901 | 2.16114809  | -5.10737009 |
| C  | -1.24755227 | 2.90813676  | -6.18641087 |
| C  | 0.63753750  | -5.11584786 | -2.61253202 |
| C  | 1.72604596  | -5.62930969 | -1.66989846 |
| C  | 1.21406452  | -6.31825094 | -0.40111951 |
| C  | -0.09980776 | -7.07419784 | -0.61087657 |
| C  | -1.06985305 | -6.30459625 | -1.50306163 |
| O  | -0.46120607 | -6.02416784 | -2.72478316 |
| O  | -0.77827475 | -7.27994201 | 0.62325332  |
| C  | -0.33519374 | -8.39307592 | 1.39855778  |
| C  | -0.80749287 | -8.23800034 | 2.83850633  |
| O  | -0.22684816 | -7.08947156 | 3.45426777  |
| O  | 2.20856687  | -7.19231451 | 0.06014445  |
| O  | 2.49052092  | -4.48359445 | -1.30280635 |
| C  | 3.88299100  | -4.59485303 | -1.21823612 |
| C  | 4.39251741  | -4.20654889 | 0.18350838  |
| C  | 4.43091585  | -2.70075429 | 0.41445103  |
| C  | 4.97492233  | -1.92675384 | -0.77834243 |
| C  | 4.27747416  | -2.39027145 | -2.04882897 |
| O  | 4.49520338  | -3.79313903 | -2.20210374 |
| C  | 4.77462920  | -1.73125869 | -3.31792665 |
| O  | 3.92555455  | -1.99952794 | -4.41178211 |
| O  | 4.71351155  | -0.54452398 | -0.52432008 |
| C  | 5.78499447  | 0.34112020  | -0.38581949 |
| C  | 5.66371539  | 1.10938657  | 0.94218227  |
| C  | 4.50351921  | 2.08772022  | 0.87546012  |
| C  | 4.57931304  | 2.96254629  | -0.37243574 |
| C  | 4.70210739  | 2.08494461  | -1.62183623 |
| O  | 5.84368045  | 1.24503238  | -1.45955101 |
| O  | 5.48134965  | 0.17835933  | 1.98367732  |
| C  | 6.01260751  | 0.52992480  | 3.26926055  |
| C  | 5.29926646  | -0.28854024 | 4.33825065  |
| O  | 5.61464171  | -1.65936178 | 4.26385128  |
| O  | 4.50661479  | 2.89196755  | 2.03530454  |
| O  | 3.37567464  | 3.72299706  | -0.32547100 |
| C  | 3.39163651  | 5.09030053  | -0.59609533 |
| C  | 2.68440449  | 5.84418666  | 0.53223504  |
| C  | 1.21496847  | 5.46260594  | 0.59142984  |

|   |             |             |             |
|---|-------------|-------------|-------------|
| C | 0.57142776  | 5.59942062  | -0.79130006 |
| C | 1.38635653  | 4.83952529  | -1.83913034 |
| O | 2.73265628  | 5.34661287  | -1.82388227 |
| C | 0.86679867  | 4.96591544  | -3.25829290 |
| O | 1.26788264  | 3.89216462  | -4.09669661 |
| O | -0.72486944 | 5.04505598  | -0.66544218 |
| C | -1.81882388 | 5.71300622  | -1.24557203 |
| C | -2.80255099 | 6.10162585  | -0.14384205 |
| C | -3.41853824 | 4.87856561  | 0.52270499  |
| C | -3.91736008 | 3.87660296  | -0.51850680 |
| C | -2.92311627 | 3.65743241  | -1.66851801 |
| O | -2.44347132 | 4.89723398  | -2.19631347 |
| C | -3.56699852 | 2.90447650  | -2.82263294 |
| O | -2.72993361 | 1.87692762  | -3.33978947 |
| O | -4.10907891 | 2.62216564  | 0.12591776  |
| C | -5.38921830 | 2.08816181  | 0.22000632  |
| C | -5.53830534 | 1.34848757  | 1.56796277  |
| C | -4.71185818 | 0.07027806  | 1.58925420  |
| C | -5.02796649 | -0.78026676 | 0.36137712  |
| C | -4.82221507 | 0.04845939  | -0.90085157 |
| O | -5.67674836 | 1.19317838  | -0.84131291 |
| O | -5.14011946 | 2.12857403  | 2.66008823  |
| C | -6.06929187 | 3.10362371  | 3.09158845  |
| C | -5.39335168 | 3.83520483  | 4.24199903  |
| O | -4.08944016 | 4.24407159  | 3.82675623  |
| O | -5.00752032 | -0.64309084 | 2.76152910  |
| O | -4.16862902 | -1.91513074 | 0.35991675  |
| C | -4.71067702 | -3.15893478 | 0.71515200  |
| C | -3.78146813 | -3.85634713 | 1.72274413  |
| C | -2.45880227 | -4.23727496 | 1.06342561  |
| C | -2.71064899 | -4.99774176 | -0.23837872 |
| C | -3.70263285 | -4.25927651 | -1.12801897 |
| O | -4.90242312 | -3.97927685 | -0.40691073 |
| C | -5.18642499 | -0.67870837 | -2.17770802 |
| O | -4.96998275 | 0.13806580  | -3.31909127 |
| O | -4.48748843 | 5.27746754  | 1.33376499  |
| O | -2.12505068 | 6.87444245  | 0.82291114  |
| C | -2.41285101 | 8.26939385  | 0.78486072  |
| C | -1.28365114 | 9.04204778  | 1.44829060  |
| O | -0.08480977 | 8.88628674  | 0.71864676  |
| O | 0.57139682  | 6.29156510  | 1.52634520  |
| O | 3.32637198  | 5.55741685  | 1.74927287  |
| C | 4.21835674  | 6.57124513  | 2.21486671  |
| C | 5.45272808  | 5.93780349  | 2.83817846  |
| O | 6.12661749  | 5.14785410  | 1.87892043  |
| C | 4.97647992  | 2.80903179  | -2.94129002 |
| O | 3.89067983  | 3.55619255  | -3.44400314 |
| O | 5.22517652  | -2.45437431 | 1.54861322  |
| O | 3.56836969  | -4.81746599 | 1.14391861  |
| C | 4.21980177  | -5.29043386 | 2.31084462  |
| C | 3.14731006  | -5.70331380 | 3.29734863  |
| O | 2.42103356  | -6.76945864 | 2.70539789  |
| C | 1.17105091  | -4.90041626 | -4.01425762 |
| O | 0.29212190  | -4.16529073 | -4.82518228 |
| O | -1.44819507 | -5.09443588 | -0.87895004 |
| O | -3.64912147 | -2.96775236 | 2.80336600  |
| C | -3.07716385 | -3.44850151 | 4.01965764  |
| C | -3.57903668 | -2.59252120 | 5.17993255  |

|   |             |             |             |
|---|-------------|-------------|-------------|
| O | -3.16563017 | -1.25054980 | 5.05041696  |
| O | -1.67840465 | -5.03111363 | 1.93247305  |
| C | -4.14182365 | -5.05075540 | -2.34498446 |
| O | -5.05450546 | -4.31579900 | -3.12373973 |
| C | -5.08143307 | -2.71322912 | 5.40387241  |
| C | -6.15782756 | 5.06275883  | 4.68274967  |
| C | -1.61894666 | 10.52118168 | 1.51096829  |
| C | 6.40439737  | 7.00710860  | 3.34369726  |
| C | 5.71011966  | 0.18637919  | 5.72081569  |
| C | 3.74272691  | -6.12426868 | 4.63082357  |
| C | -2.31968752 | -8.22640302 | 2.99039658  |
| H | -4.56202090 | -1.56391884 | -2.29620157 |
| H | -2.48922226 | 8.61012247  | -0.25775262 |
| H | 1.52914109  | -6.83685246 | 3.09936936  |
| H | 5.21116572  | -2.04587608 | 3.47500276  |
| H | 5.75209532  | 4.25535445  | 1.95032567  |
| H | 0.33223182  | 8.06619896  | 1.02810791  |
| H | -3.66248850 | 3.43214772  | 3.51696297  |
| H | -3.77486827 | -0.79610461 | 4.45079853  |
| H | -0.77704388 | -6.31932363 | 3.25128722  |
| H | -0.80104662 | 11.06314702 | 1.99068220  |
| H | -1.74379794 | 10.92617762 | 0.50142307  |
| H | -2.53740477 | 10.70093346 | 2.07712447  |
| H | -6.26607850 | 5.77060345  | 3.85469224  |
| H | -7.15521533 | 4.78864687  | 5.03861129  |
| H | -5.62804139 | 5.56299679  | 5.49665266  |
| H | -5.64295804 | -2.35126301 | 4.53690837  |
| H | -5.37311001 | -3.75156069 | 5.59194985  |
| H | -5.37219632 | -2.11265398 | 6.26940002  |
| H | -2.74909971 | -7.35890622 | 2.48067952  |
| H | -2.76145432 | -9.13221864 | 2.56545455  |
| H | -2.58902930 | -8.17496169 | 4.04856014  |
| H | 4.28401970  | -5.29828278 | 5.10299117  |
| H | 2.95124841  | -6.44619380 | 5.31348270  |
| H | 4.43108250  | -6.96379577 | 4.49276928  |
| H | 5.21386962  | -0.42700496 | 6.47605524  |
| H | 6.79072049  | 0.07586231  | 5.85653683  |
| H | 5.43731188  | 1.23279470  | 5.88389790  |
| H | 6.75969468  | 7.62295504  | 2.51099616  |
| H | 5.92519025  | 7.65820223  | 4.08088758  |
| H | 7.27443522  | 6.53699721  | 3.80701909  |
| H | 2.48472199  | -4.83577077 | 3.44185621  |
| H | 4.21735243  | -0.12212918 | 4.20262888  |
| H | 5.12767803  | 5.31233534  | 3.68461788  |
| H | -1.16404128 | 8.65505567  | 2.47329017  |
| H | -5.28732341 | 3.13441533  | 5.08271792  |
| H | -3.06101035 | -2.97775790 | 6.06901057  |
| H | -0.39821092 | -9.09818415 | 3.38257532  |
| H | -3.35999007 | -4.49905736 | 4.17204034  |
| H | -1.98661081 | -3.38547424 | 3.95334814  |
| H | -6.29499737 | 3.81698464  | 2.28671244  |
| H | -7.00466546 | 2.63213994  | 3.42772539  |
| H | -3.37196607 | 8.45386552  | 1.28764965  |
| H | 4.54902987  | 7.19512536  | 1.37350999  |
| H | 3.69083096  | 7.20931751  | 2.93582224  |
| H | 7.08975952  | 0.31313031  | 3.29207224  |
| H | 5.84487230  | 1.59558710  | 3.44508196  |
| H | 4.84895146  | -6.16244580 | 2.07022822  |

|   |             |             |             |
|---|-------------|-------------|-------------|
| H | 4.85260771  | -4.51277354 | 2.75123755  |
| H | -0.74915548 | -9.32126850 | 0.97702688  |
| H | 0.75524236  | -8.45679509 | 1.36519893  |
| H | 3.73052125  | 4.33555468  | -2.88273577 |
| H | -5.65788630 | 0.81307822  | -3.30209698 |
| H | -5.76215852 | -4.05014552 | -2.52421558 |
| H | -3.27404738 | -5.26424742 | -2.97643987 |
| H | -4.57587989 | -6.00837833 | -2.01545575 |
| H | -3.24380025 | -3.31539359 | -1.44947285 |
| H | -3.09816779 | -5.99798196 | 0.00506591  |
| H | -1.20886087 | -5.68996706 | 1.38281368  |
| H | -1.92454285 | -3.30880247 | 0.81333629  |
| H | -4.28556122 | -4.77969099 | 2.05151056  |
| H | -5.70191787 | -3.03162307 | 1.16510286  |
| H | -0.54708870 | -4.63842726 | -4.83364674 |
| H | 2.09560898  | -4.31990618 | -3.93765459 |
| H | 1.41767079  | -5.88178098 | -4.45131806 |
| H | 0.26036784  | -4.16311352 | -2.22877895 |
| H | 2.36107877  | -6.35527544 | -2.19934531 |
| H | 2.41417937  | -6.95583353 | 0.99043225  |
| H | 1.01861677  | -5.51952425 | 0.32653831  |
| H | 0.11288298  | -8.03925400 | -1.09061373 |
| H | -1.95279930 | -6.91797758 | -1.72152991 |
| H | 3.98343238  | -2.94591364 | -4.58290181 |
| H | 5.80764843  | -2.05636522 | -3.51308182 |
| H | 4.78823008  | -0.64721119 | -3.17583983 |
| H | 3.20262466  | -2.18378987 | -1.95885233 |
| H | 6.05735570  | -2.10019219 | -0.86650701 |
| H | 5.33570390  | -1.48317876 | 1.62206846  |
| H | 3.39472843  | -2.35981419 | 0.56850874  |
| H | 5.42584761  | -4.57779926 | 0.25669801  |
| H | 4.18677943  | -5.62333593 | -1.43730396 |
| H | 5.21883315  | 2.04636186  | -3.68638562 |
| H | 3.78924171  | 1.48103493  | -1.72004921 |
| H | 5.44920460  | 3.63233978  | -0.30241154 |
| H | 3.81691726  | 3.57332031  | 1.93330614  |
| H | 3.57411251  | 1.50135099  | 0.82228767  |
| H | 6.60162735  | 1.66664624  | 1.08298424  |
| H | 6.73817487  | -0.19984229 | -0.40948989 |
| H | 2.21625781  | 3.67846507  | -3.97399565 |
| H | 1.19046444  | 5.92839072  | -3.67734034 |
| H | -0.22687270 | 4.94415470  | -3.23579788 |
| H | 1.39326898  | 3.77722645  | -1.56293828 |
| H | 0.51227129  | 6.66724752  | -1.04977623 |
| H | -0.39183765 | 6.18983724  | 1.40661210  |
| H | 1.13324464  | 4.40677871  | 0.89235144  |
| H | 2.74434063  | 6.91751082  | 0.30534068  |
| H | 4.41767172  | 5.46068244  | -0.70900080 |
| H | -3.29334120 | 1.08760050  | -3.45332845 |
| H | -3.81326279 | 3.63485668  | -3.60541609 |
| H | -4.49487890 | 2.45063997  | -2.46724997 |
| H | -2.08397749 | 3.07343342  | -1.27374797 |
| H | -4.87149692 | 4.25335464  | -0.91779551 |
| H | -4.27991363 | 5.05754076  | 2.26430402  |
| H | -2.63051442 | 4.37918239  | 1.10315334  |
| H | -3.61687687 | 6.68143283  | -0.59786193 |
| H | -1.47882685 | 6.60600753  | -1.78487686 |
| H | -6.23639372 | -1.00050038 | -2.13387515 |

|   |             |             |             |
|---|-------------|-------------|-------------|
| H | -3.77244282 | 0.36992132  | -0.95847752 |
| H | -6.07912044 | -1.10281061 | 0.41090586  |
| H | -4.47429120 | -1.46493629 | 2.72993868  |
| H | -3.64694477 | 0.34515748  | 1.55018072  |
| H | -6.59935531 | 1.06652280  | 1.66581139  |
| H | -6.14378526 | 2.87768133  | 0.12547317  |
| H | 5.86774817  | 3.44187110  | -2.82667499 |
| H | 2.32733530  | 0.31910139  | -3.03785940 |
| H | 2.05122021  | 1.45903695  | -5.22577506 |
| H | 1.83399649  | -0.27706265 | -5.40831673 |
| H | 0.06719956  | 0.86757440  | -6.63597224 |
| H | 0.18342747  | 2.77315483  | -4.70563488 |
| H | -1.28340710 | 2.00674372  | -4.36044966 |
| H | -1.63877392 | 3.84175121  | -5.77894463 |
| H | -2.07209300 | 2.30993532  | -6.57619328 |
| H | -0.53464053 | 3.12763127  | -6.98246531 |
| H | 1.18835006  | -2.67749626 | -1.20617064 |
| H | 0.85967940  | -2.67095499 | 1.21578170  |
| H | -0.73612252 | 1.15922888  | -1.47748132 |
| H | -2.10838615 | -0.08837369 | -6.92788130 |
| H | -3.78777560 | -1.77689316 | -6.24835616 |
| H | -3.54802005 | -2.93711933 | -4.07262261 |
| H | -1.59778175 | -2.44246629 | -2.61691842 |
| H | 1.08088615  | -1.65497318 | -3.27857990 |
| H | 0.92392805  | 1.36228534  | -2.98936988 |

255

2-HP-B-CD:cis-(1S,4S)-SRT\_5\_MD E(Ha)= -7253.9061410569

|    |             |             |             |
|----|-------------|-------------|-------------|
| C  | 0.83695785  | 5.71423904  | -3.17463692 |
| C  | -0.40490590 | 4.85358805  | -3.30512103 |
| C  | -0.35623878 | 3.45312341  | -3.21173370 |
| C  | 0.95610813  | 2.71240951  | -3.00563157 |
| C  | 2.05808941  | 3.62904951  | -2.46728964 |
| C  | 2.12848501  | 4.91471750  | -3.28123280 |
| C  | -1.61965138 | 5.48541955  | -3.60100321 |
| C  | -2.78496824 | 4.75179593  | -3.78454208 |
| C  | -2.74045940 | 3.36097551  | -3.67637387 |
| C  | -1.53930616 | 2.72334763  | -3.39569594 |
| C  | 0.79620897  | 1.45900155  | -2.17240353 |
| C  | 1.22124319  | 0.22113756  | -2.65577274 |
| C  | 1.04356413  | -0.94089648 | -1.91342812 |
| C  | 0.42972039  | -0.88161326 | -0.66545629 |
| C  | 0.02288673  | 0.35805613  | -0.15866937 |
| C  | 0.20668128  | 1.51437572  | -0.90774761 |
| Cl | 0.15513423  | -2.34099010 | 0.21640265  |
| Cl | -0.73160071 | 0.47554014  | 1.39704632  |
| N  | 0.82233185  | 6.50494206  | -1.88512109 |
| C  | 1.55402898  | 7.78965360  | -1.96525671 |
| O  | -2.98255870 | 5.13310279  | -0.48209452 |
| C  | -3.29065092 | 4.08943973  | 0.42521455  |
| C  | -2.85867040 | 4.45125548  | 1.83730140  |
| C  | -3.37520869 | 3.41473152  | 2.85000921  |
| O  | -4.77408389 | 3.17595742  | 2.67428079  |
| C  | -5.13573279 | 2.72137586  | 1.40245621  |
| C  | -4.78304093 | 3.79774399  | 0.37654006  |
| C  | -3.24566658 | 3.89322752  | 4.28711982  |
| O  | -3.89806009 | 5.12662689  | 4.48251088  |
| O  | -1.44106421 | 4.48622537  | 1.83430893  |
| C  | -0.77293131 | 5.36711052  | 2.69941542  |
| C  | 0.27997447  | 6.12581940  | 1.87435610  |
| C  | 1.25317833  | 5.09750652  | 1.32189844  |
| C  | 1.90682117  | 4.36439428  | 2.47967715  |
| C  | 0.83869176  | 3.73642269  | 3.38019877  |
| O  | -0.13104419 | 4.71325231  | 3.75716343  |
| C  | 1.43050955  | 3.17138740  | 4.65449970  |
| O  | 2.27563794  | 4.14297977  | 5.22866645  |
| O  | 2.74000683  | 3.36542601  | 1.91768614  |
| C  | 4.04499816  | 3.23203779  | 2.42059420  |
| C  | 5.00153452  | 3.19253347  | 1.23501866  |
| C  | 4.82633411  | 1.91553690  | 0.42482097  |
| C  | 4.86928223  | 0.68189253  | 1.32443537  |
| C  | 3.92621301  | 0.84251816  | 2.52014245  |
| O  | 4.20176743  | 2.07918470  | 3.19365452  |
| O  | 4.76102327  | 4.33215399  | 0.42480330  |
| C  | 5.92270413  | 4.93477447  | -0.11992375 |
| C  | 5.57675340  | 5.60669094  | -1.43628055 |
| O  | 4.46457987  | 6.48196055  | -1.29401296 |
| O  | 5.83747547  | 1.85776260  | -0.55478430 |
| O  | 4.47914430  | -0.45044729 | 0.55660767  |
| C  | 5.49957953  | -1.36059563 | 0.24574314  |
| C  | 5.15356082  | -2.07585993 | -1.07399675 |
| C  | 3.95787139  | -2.98777597 | -0.87798700 |
| C  | 4.21716574  | -3.95835490 | 0.26982801  |
| C  | 4.59321500  | -3.17003571 | 1.51949713  |

|   |             |             |             |
|---|-------------|-------------|-------------|
| O | 5.70492771  | -2.31387237 | 1.25301348  |
| C | 4.10401495  | -0.22005808 | 3.58833291  |
| O | 5.44721985  | -0.35776418 | 3.99173735  |
| O | 2.19145619  | 5.73720555  | 0.47928250  |
| O | -0.25063713 | 6.83027454  | 0.78033468  |
| C | -1.24488587 | 7.78174050  | 1.08200419  |
| C | -1.61747945 | 8.47670449  | -0.22011306 |
| O | -1.74283426 | 7.51019447  | -1.25820625 |
| O | -5.08359430 | 3.38374825  | -0.94172540 |
| C | -6.42988210 | 3.65105037  | -1.33676252 |
| C | -6.77399314 | 2.83642314  | -2.57441961 |
| O | -6.78335504 | 1.45905604  | -2.29134849 |
| O | -4.43457261 | 1.54840396  | 1.07017016  |
| C | -5.19645500 | 0.42032702  | 0.65924680  |
| C | -4.39147406 | -0.25375893 | -0.44302722 |
| C | -5.10472193 | -1.52269707 | -0.88912075 |
| C | -5.37607326 | -2.40165312 | 0.34105709  |
| O | -6.12270416 | -1.68981740 | 1.29695145  |
| C | -5.45905317 | -0.53803982 | 1.81467339  |
| O | -4.33400894 | -2.27927410 | -1.80693597 |
| C | -4.50054439 | -1.93881984 | -3.18951737 |
| C | -3.18234609 | -2.22974287 | -3.89597712 |
| O | -2.14745960 | -1.46199999 | -3.31208058 |
| O | -4.23574878 | 0.62897994  | -1.54385642 |
| C | -6.38021912 | 0.04887888  | 2.86838154  |
| O | -7.57544584 | 0.54635167  | 2.31154322  |
| O | -4.14524037 | -2.81484798 | 0.85774523  |
| C | -4.02341200 | -4.18505832 | 1.22435834  |
| C | -3.01619691 | -4.27188293 | 2.36630521  |
| O | -2.72185950 | -5.63922337 | 2.65439014  |
| C | -2.20001131 | -6.35560458 | 1.56724025  |
| C | -3.23626507 | -6.41159404 | 0.43787996  |
| C | -3.56760817 | -4.99242098 | 0.00602125  |
| C | -3.51844703 | -3.69503107 | 3.67779479  |
| O | -2.56594704 | -3.85186176 | 4.69742947  |
| O | -4.56341889 | -5.01604953 | -0.98478888 |
| O | -2.71205974 | -7.14782120 | -0.64572937 |
| C | -3.15400662 | -8.50277436 | -0.69010329 |
| C | -2.20069677 | -9.33873586 | -1.53105993 |
| O | -0.94262398 | -9.44715389 | -0.90758289 |
| O | -1.05352626 | -5.72579777 | 1.06088053  |
| C | 0.17964415  | -6.43055812 | 1.00672122  |
| C | 0.73096301  | -6.19423144 | -0.39458707 |
| C | 2.17529591  | -6.64641702 | -0.50129299 |
| C | 2.98895039  | -6.04357407 | 0.64672248  |
| O | 2.44205890  | -6.39118509 | 1.88158033  |
| C | 1.12240881  | -5.88398614 | 2.08074708  |
| O | 2.74603779  | -6.19062237 | -1.70923889 |
| C | 2.99282616  | -7.16800930 | -2.71228278 |
| C | 3.66068104  | -6.47478069 | -3.89240650 |
| O | 4.87666736  | -5.87517636 | -3.51020178 |
| O | -0.03105308 | -6.85983363 | -1.37770597 |
| C | 0.67976416  | -6.25179273 | 3.48096384  |
| O | 0.35230392  | -7.62328858 | 3.51537397  |
| O | 2.99621340  | -4.64654119 | 0.47394849  |
| O | 4.84444769  | -1.18339599 | -2.11683170 |
| C | 5.94820072  | -0.61160991 | -2.78499055 |
| C | 5.35286621  | 0.47022296  | -3.67370426 |



|   |             |              |             |
|---|-------------|--------------|-------------|
| O | 4.47285685  | 1.26269304   | -2.86928802 |
| O | 3.67044107  | -3.65546021  | -2.08131337 |
| C | 4.99193610  | -4.00990433  | 2.71777632  |
| O | 5.05835287  | -3.24682772  | 3.89300360  |
| C | 6.39420816  | 1.37459574   | -4.29117987 |
| C | 6.78088447  | 6.32154884   | -2.02698569 |
| C | -2.88307861 | 9.30256318   | -0.07419004 |
| C | -8.15090229 | 3.21275730   | -3.09106525 |
| C | -2.83593304 | -3.71313577  | -3.93518744 |
| C | -2.75304327 | -10.74188895 | -1.71236513 |
| C | 3.95988610  | -7.47343657  | -4.99520493 |
| H | 3.45363132  | 0.03679186   | 4.43714041  |
| H | -2.14248673 | 7.29374425   | 1.49001554  |
| H | -0.45334360 | -8.62719233  | -1.08796497 |
| H | -2.20855693 | -1.62359915  | -2.36237324 |
| H | -5.86937925 | 1.16800801   | -2.12280600 |
| H | -2.23943545 | 6.74687002   | -0.90121538 |
| H | 4.69353206  | 7.15200378   | -0.63953728 |
| H | 3.94461952  | 0.60852233   | -2.37928496 |
| H | 4.66850986  | -5.06485481  | -3.02155579 |
| H | -2.77003659 | 10.06735459  | 0.70086343  |
| H | -3.11861302 | 9.80163125   | -1.01682436 |
| H | -3.73073070 | 8.66389734   | 0.19617713  |
| H | 6.50681331  | 6.80608275   | -2.96715415 |
| H | 7.15498503  | 7.09283570   | -1.34314487 |
| H | 7.60103580  | 5.62491741   | -2.22527586 |
| H | 7.06972719  | 0.80072345   | -4.93188496 |
| H | 5.91657182  | 2.14408128   | -4.90299260 |
| H | 6.98937929  | 1.86724305   | -3.51528053 |
| H | 4.42413931  | -6.96022570  | -5.84028758 |
| H | 4.66132945  | -8.23312082  | -4.63619579 |
| H | 3.05023374  | -7.97150391  | -5.34355298 |
| H | -2.05445507 | -11.33472386 | -2.30669856 |
| H | -2.86489226 | -11.23273402 | -0.74005905 |
| H | -3.72411223 | -10.73317579 | -2.21592485 |
| H | -1.86746580 | -3.85264127  | -4.42141048 |
| H | -2.77487058 | -4.14252028  | -2.93039110 |
| H | -3.58767653 | -4.28006160  | -4.49417920 |
| H | -8.20210085 | 4.26856948   | -3.37232986 |
| H | -8.38939495 | 2.60599473   | -3.96714619 |
| H | -8.90999707 | 3.01368927   | -2.32809027 |
| H | -2.10826177 | -8.85562404  | -2.51832528 |
| H | -3.28409949 | -1.86368411  | -4.92546798 |
| H | -6.02397139 | 3.07183523   | -3.35043370 |
| H | -0.78969744 | 9.12839574   | -0.52615024 |
| H | 5.22896187  | 4.82748124   | -2.12454603 |
| H | 4.75959114  | -0.01625215  | -4.46175916 |
| H | 2.95661896  | -5.71501715  | -4.27267610 |
| H | 6.65310346  | -0.15640445  | -2.07422759 |
| H | 6.48267017  | -1.36319595  | -3.38345033 |
| H | 6.32608889  | 5.67944018   | 0.58852821  |
| H | 6.69041275  | 4.17609225   | -0.30205160 |
| H | -0.89363017 | 8.51401092   | 1.82503513  |
| H | -7.12699317 | 3.36974650   | -0.53587394 |
| H | -6.54046133 | 4.72785655   | -1.53278281 |
| H | -5.32271207 | -2.52719506  | -3.62012604 |
| H | -4.73122099 | -0.87502594  | -3.28018963 |
| H | -3.16952410 | -8.92967156  | 0.32286122  |

|   |             |             |             |
|---|-------------|-------------|-------------|
| H | -4.17299845 | -8.53140356 | -1.10118051 |
| H | 3.66888194  | -7.94045911 | -2.31761077 |
| H | 2.04823377  | -7.63646133 | -3.01657389 |
| H | -8.01040577 | -0.19651685 | 1.87707090  |
| H | 5.71175781  | 0.46740693  | 4.41139790  |
| H | 5.66345103  | -2.50557952 | 3.75209468  |
| H | 4.23572630  | -4.78444846 | 2.88049423  |
| H | 5.94841306  | -4.50881600 | 2.48925984  |
| H | 3.71304584  | -2.57018066 | 1.78946896  |
| H | 5.01667037  | -4.66012784 | -0.01185173 |
| H | 3.11346934  | -4.42911828 | -1.85948908 |
| H | 3.10384152  | -2.36021044 | -0.58017905 |
| H | 6.02458497  | -2.69007785 | -1.34963188 |
| H | 6.45495187  | -0.83165279 | 0.15801962  |
| H | 0.28047955  | -7.89815400 | 4.43288083  |
| H | 1.50151202  | -6.00515212 | 4.16718207  |
| H | -0.18485366 | -5.62121292 | 3.73725208  |
| H | 1.14048756  | -4.78814907 | 2.00679868  |
| H | 0.02146480  | -7.50423469 | 1.16560677  |
| H | -0.97464585 | -6.67954328 | -1.19915664 |
| H | 0.71273320  | -5.11063063 | -0.57995747 |
| H | 2.23096887  | -7.74094074 | -0.43544297 |
| H | 4.01099547  | -6.43975988 | 0.63685589  |
| H | -2.37814292 | -4.79700990 | 4.73358328  |
| H | -4.47750989 | -4.17444593 | 3.93555295  |
| H | -3.69931198 | -2.62369748 | 3.55827691  |
| H | -2.09462818 | -3.75213217 | 2.07394861  |
| H | -4.99650599 | -4.57271471 | 1.56260822  |
| H | -4.51025502 | -4.16183606 | -1.44344046 |
| H | -2.64634824 | -4.52699515 | -0.37301728 |
| H | -4.15144270 | -6.88988034 | 0.81292033  |
| H | -1.95616504 | -7.35313895 | 1.94823819  |
| H | -5.88145302 | 0.89022693  | 3.35862160  |
| H | -4.50359502 | -0.82199996 | 2.27654756  |
| H | -6.15911062 | 0.74493576  | 0.24264833  |
| H | -4.07066314 | 1.51040510  | -1.17198146 |
| H | -3.40469383 | -0.53245475 | -0.04696420 |
| H | -6.07402966 | -1.25692477 | -1.33490802 |
| H | -5.99309518 | -3.26061474 | 0.06124081  |
| H | -4.83362539 | 4.97260772  | 4.30838562  |
| H | -2.19269051 | 4.03780708  | 4.53950343  |
| H | -3.65072549 | 3.10964309  | 4.94332251  |
| H | -2.81553023 | 2.48095956  | 2.70848747  |
| H | -3.27116142 | 5.43325382  | 2.10995759  |
| H | -3.24352950 | 4.81114153  | -1.35756880 |
| H | -2.74600229 | 3.17757145  | 0.14003279  |
| H | -5.33160926 | 4.71900041  | 0.62190598  |
| H | -6.21251235 | 2.52369032  | 1.44675004  |
| H | 2.63947267  | 3.78309962  | 6.04192114  |
| H | 1.98467146  | 2.25911764  | 4.39661225  |
| H | 0.60031451  | 2.90086522  | 5.32269607  |
| H | 0.35040033  | 2.92211719  | 2.82716350  |
| H | 2.50126298  | 5.06994094  | 3.07339974  |
| H | 2.99715128  | 5.18728279  | 0.40383916  |
| H | 0.67069493  | 4.36600802  | 0.74194248  |
| H | 0.80589111  | 6.81531540  | 2.55412291  |
| H | -1.48553843 | 6.04466106  | 3.18339393  |
| H | 3.78968789  | -1.19577603 | 3.22167219  |

|   |             |             |             |
|---|-------------|-------------|-------------|
| H | 2.88522081  | 0.83644352  | 2.16710740  |
| H | 5.88647612  | 0.54453206  | 1.71302269  |
| H | 5.40405593  | 1.74385914  | -1.42193433 |
| H | 3.83020309  | 1.95254679  | -0.03965396 |
| H | 6.02479199  | 3.22079188  | 1.63373879  |
| H | 4.27706744  | 4.06868284  | 3.08871362  |
| H | -6.57358239 | -0.72206446 | 3.62782389  |
| H | 3.01441129  | 3.10097645  | -2.51879442 |
| H | 2.97822711  | 5.52882950  | -2.96653917 |
| H | 2.28499880  | 4.66957357  | -4.33847838 |
| H | 0.80473801  | 6.47711109  | -3.96074193 |
| H | 1.26441782  | 5.98705834  | -1.09645316 |
| H | -0.15724614 | 6.72558205  | -1.59084826 |
| H | 1.05641896  | 8.44279988  | -2.68398526 |
| H | 2.58868535  | 7.60405643  | -2.25498070 |
| H | 1.53660593  | 8.23697048  | -0.97135677 |
| H | 1.67771548  | 0.15365306  | -3.63945940 |
| H | 1.38030654  | -1.89757754 | -2.30043376 |
| H | -0.15038066 | 2.45784536  | -0.50504167 |
| H | -1.65160947 | 6.56897474  | -3.68375534 |
| H | -3.71321086 | 5.25802145  | -4.03475805 |
| H | -3.63724345 | 2.76724708  | -3.82529944 |
| H | -1.52097630 | 1.63810360  | -3.32691472 |
| H | 1.28127565  | 2.38498205  | -4.00471471 |
| H | 1.87923622  | 3.85131732  | -1.40724376 |

2-HP-B-CD:cis-(1S,4S)-SRT\_6\_MD E(Ha)= -7253.9052157931

|    |             |             |             |
|----|-------------|-------------|-------------|
| C  | -3.85053244 | -3.78272652 | -5.24170550 |
| C  | -2.35730941 | -3.78487262 | -5.48007171 |
| C  | -1.59641010 | -2.61611537 | -5.34740721 |
| C  | -2.21362214 | -1.27653616 | -4.98121663 |
| C  | -3.69998025 | -1.36845463 | -4.59686980 |
| C  | -4.45308753 | -2.39768868 | -5.43078835 |
| C  | -1.74288456 | -4.97507935 | -5.89237817 |
| C  | -0.38768102 | -5.01816120 | -6.18188759 |
| C  | 0.37415405  | -3.85415490 | -6.05681771 |
| C  | -0.22408686 | -2.67087439 | -5.63666732 |
| C  | -1.44331272 | -0.56262396 | -3.88885202 |
| C  | -0.99612174 | 0.74502858  | -4.06601532 |
| C  | -0.36540283 | 1.43235438  | -3.03427386 |
| C  | -0.16743331 | 0.81480984  | -1.80207881 |
| C  | -0.59793891 | -0.50656109 | -1.61760735 |
| C  | -1.22794655 | -1.18529369 | -2.65560300 |
| Cl | 0.58610086  | 1.69358846  | -0.52184022 |
| Cl | -0.37152286 | -1.30392685 | -0.10064835 |
| N  | -4.18189203 | -4.30636393 | -3.85791677 |
| C  | -5.32638288 | -5.23978955 | -3.81706561 |
| C  | -0.39451932 | 5.50897201  | -3.53208644 |
| O  | -1.20289625 | 4.40934844  | -3.87002501 |
| C  | 0.21097184  | 5.40451064  | -2.13116563 |
| C  | -0.67453511 | 5.90962102  | -0.98981791 |
| C  | 0.06934778  | 5.91648287  | 0.34567910  |
| C  | 1.38365704  | 6.66042027  | 0.20139235  |
| C  | 2.16221711  | 6.07743871  | -0.98367142 |
| O  | 1.40989327  | 6.17757647  | -2.16155960 |
| O  | 2.16030073  | 6.54330191  | 1.37225110  |
| C  | 2.79878098  | 7.75076558  | 1.78357180  |
| C  | 4.09931500  | 7.43396569  | 2.50695480  |
| O  | 5.02023532  | 6.83456638  | 1.62294131  |
| O  | -0.71831829 | 6.52451267  | 1.34713220  |
| O  | -1.79584558 | 5.06000694  | -0.77158961 |
| C  | -3.05071092 | 5.42059230  | -1.26776993 |
| C  | -4.04038688 | 5.49618679  | -0.10966545 |
| C  | -4.22535830 | 4.14032790  | 0.55949144  |
| C  | -4.46026806 | 3.03814013  | -0.47310371 |
| C  | -3.54154306 | 3.12432492  | -1.68949920 |
| O  | -3.49449726 | 4.46520056  | -2.20949191 |
| C  | -4.03111172 | 2.26618137  | -2.84172541 |
| O  | -5.31319209 | 2.63267245  | -3.28584389 |
| O  | -4.20368218 | 1.76461178  | 0.10670552  |
| C  | -5.24070777 | 1.20064472  | 0.85505909  |
| C  | -4.72704730 | 0.80194234  | 2.25008801  |
| C  | -3.84678954 | -0.44232184 | 2.19806401  |
| C  | -4.50381144 | -1.53515387 | 1.36605473  |
| C  | -4.85840679 | -0.97817031 | -0.01083857 |
| O  | -5.78275295 | 0.07946479  | 0.19025844  |
| O  | -4.03335233 | 1.89895399  | 2.78527851  |
| C  | -4.11937511 | 2.07024343  | 4.18476266  |
| C  | -3.44000671 | 3.37921378  | 4.52752673  |
| O  | -4.21158732 | 4.41435489  | 3.91977012  |
| O  | -3.62283663 | -0.88565663 | 3.52443686  |
| O  | -3.56953488 | -2.61226097 | 1.31194609  |
| C  | -4.05476080 | -3.91907689 | 1.43336778  |

|   |             |             |             |
|---|-------------|-------------|-------------|
| C | -3.52682992 | -4.56149479 | 2.71445449  |
| C | -2.01783729 | -4.71899258 | 2.68744642  |
| C | -1.54943627 | -5.33250874 | 1.36452339  |
| C | -2.25796658 | -4.79810035 | 0.11234799  |
| O | -3.68143795 | -4.67162869 | 0.29792428  |
| C | -2.05940784 | -5.72982634 | -1.07602799 |
| O | -2.10685871 | -5.06251662 | -2.32737871 |
| O | -0.17237065 | -5.00744556 | 1.25989533  |
| C | 0.75365653  | -5.98483663 | 0.89967193  |
| C | 1.99929772  | -5.80202507 | 1.77801035  |
| C | 2.78636704  | -4.56795108 | 1.35802312  |
| C | 2.99177969  | -4.51779290 | -0.15220252 |
| C | 1.63698093  | -4.65150461 | -0.84430923 |
| O | 1.07982801  | -5.91283837 | -0.46794681 |
| C | 1.70210661  | -4.58193947 | -2.35047327 |
| O | 0.39641794  | -4.32963909 | -2.86479057 |
| O | 3.60076313  | -3.26652911 | -0.40292650 |
| C | 4.62996748  | -3.19348112 | -1.35994671 |
| C | 5.87754089  | -2.64538448 | -0.67654914 |
| C | 5.65020516  | -1.21045013 | -0.22426330 |
| C | 5.09059204  | -0.34866884 | -1.35919773 |
| C | 3.91354507  | -1.03905275 | -2.06080861 |
| O | 4.26474155  | -2.37482698 | -2.42770304 |
| O | 6.19669558  | -3.45241875 | 0.43853864  |
| C | 7.23391796  | -4.39718108 | 0.19312956  |
| C | 7.12697006  | -5.55549151 | 1.17262280  |
| O | 5.93828047  | -6.28420383 | 0.95305565  |
| O | 6.85029289  | -0.64967214 | 0.23630091  |
| O | 4.62468829  | 0.87663790  | -0.80610823 |
| C | 5.51711206  | 1.95463127  | -0.83668898 |
| C | 5.37923159  | 2.78908933  | 0.45171206  |
| C | 4.01669693  | 3.45442700  | 0.50364580  |
| C | 3.78672091  | 4.26201188  | -0.76953969 |
| C | 3.98405024  | 3.37406834  | -1.99221226 |
| O | 5.28666916  | 2.78678906  | -1.95087629 |
| C | 3.47573097  | -0.37729116 | -3.35846399 |
| O | 2.24571681  | -0.90037371 | -3.82329599 |
| O | 4.02730442  | -4.55893133 | 2.03225900  |
| O | 1.54866808  | -5.69976759 | 3.10325826  |
| C | 2.37911883  | -6.28133563 | 4.09029609  |
| C | 1.78220863  | -5.93056733 | 5.43656031  |
| O | 0.45269997  | -6.42492646 | 5.41268073  |
| O | -1.67331784 | -5.52457367 | 3.77220122  |
| O | -3.89408166 | -3.74473244 | 3.80229336  |
| C | -5.05866043 | -4.17627207 | 4.49667003  |
| C | -5.59667728 | -3.03041712 | 5.33926835  |
| O | -6.00358031 | -1.95906758 | 4.51743189  |
| C | -5.55224273 | -1.95363893 | -0.95753333 |
| O | -4.65510084 | -2.85941777 | -1.58149489 |
| O | -5.32967953 | 4.19061066  | 1.42060757  |
| O | -3.56728495 | 6.43011656  | 0.84352707  |
| C | -4.13376324 | 7.73222712  | 0.71112223  |
| C | -3.19790191 | 8.77461695  | 1.30420574  |
| O | -2.00448924 | 8.85387534  | 0.55780189  |
| O | 2.45408579  | 4.74036195  | -0.67771384 |
| O | 5.55680661  | 2.02326375  | 1.61477848  |
| C | 6.88836723  | 1.96460754  | 2.08760766  |
| C | 6.87404232  | 1.00943686  | 3.27073613  |

|   |             |             |             |
|---|-------------|-------------|-------------|
| O | 6.21796253  | -0.19678512 | 2.88172026  |
| O | 3.93578394  | 4.28041332  | 1.64142681  |
| C | 3.91217643  | 4.08633096  | -3.32789782 |
| O | 4.05572131  | 3.16759250  | -4.38365920 |
| C | 8.26207201  | 0.66134365  | 3.75827289  |
| C | 8.29966122  | -6.50447557 | 1.00123291  |
| C | 2.58646693  | -6.52834079 | 6.57902514  |
| C | -6.79491345 | -3.48294270 | 6.15335696  |
| C | -3.34343290 | 3.59017530  | 6.02864486  |
| C | -3.85487988 | 10.14367050 | 1.29290611  |
| C | 4.72259215  | 8.70617124  | 3.05435646  |
| H | 3.43952319  | 0.71235015  | -3.24394598 |
| H | 2.40322607  | -7.37619856 | 3.97235400  |
| H | -1.41029362 | 8.15377207  | 0.87783504  |
| H | -3.69820978 | 5.22824212  | 3.91086290  |
| H | -5.20359999 | -1.47142359 | 4.25544649  |
| H | -0.00184225 | -6.12633281 | 6.20635125  |
| H | 5.22194539  | -5.81563147 | 1.41217086  |
| H | 5.36196014  | 0.09690924  | 2.53736409  |
| H | 4.84436375  | 5.87901176  | 1.62955350  |
| H | 2.14126605  | -6.26454179 | 7.54375822  |
| H | 2.60693029  | -7.61967466 | 6.50275958  |
| H | 3.61545168  | -6.15541342 | 6.57793187  |
| H | 9.25499170  | -6.00067500 | 1.17482948  |
| H | 8.20744536  | -7.33297476 | 1.70680708  |
| H | 8.30321775  | -6.92420030 | -0.01002366 |
| H | 8.84748703  | 0.19350144  | 2.96020045  |
| H | 8.78936680  | 1.55844591  | 4.09526083  |
| H | 8.20263998  | -0.03818899 | 4.59528990  |
| H | 4.96379700  | 9.39195373  | 2.23568051  |
| H | 4.05348739  | 9.21667731  | 3.75344940  |
| H | 5.65291303  | 8.46467320  | 3.57301059  |
| H | -4.78279199 | 10.15195471 | 1.87228381  |
| H | -3.17016752 | 10.88144723 | 1.71660066  |
| H | -4.07998150 | 10.44721983 | 0.26536510  |
| H | -4.33968946 | 3.58932579  | 6.48085181  |
| H | -2.74245536 | 2.80588150  | 6.49869344  |
| H | -2.87061527 | 4.55109446  | 6.25399496  |
| H | -7.60410690 | -3.80643453 | 5.49059347  |
| H | -6.53831039 | -4.30869195 | 6.82340242  |
| H | -7.16678018 | -2.64919879 | 6.75270397  |
| H | -2.98344188 | 8.48635553  | 2.34713777  |
| H | -2.43435939 | 3.35681313  | 4.08201404  |
| H | -4.79351556 | -2.70962802 | 6.02287320  |
| H | 1.77599055  | -4.83184138 | 5.51894943  |
| H | 7.14304888  | -5.13987671 | 2.19347443  |
| H | 6.29733759  | 1.47589232  | 4.08326318  |
| H | 3.86796946  | 6.75494987  | 3.34381841  |
| H | 7.56361357  | 1.58134138  | 1.30901520  |
| H | 7.23618198  | 2.96029343  | 2.39963804  |
| H | 7.14156377  | -4.80837060 | -0.82250013 |
| H | 8.20770569  | -3.89459524 | 0.27874555  |
| H | 3.40149770  | -5.89227720 | 4.02320091  |
| H | -5.84291596 | -4.47169562 | 3.78343263  |
| H | -4.80720401 | -5.04498629 | 5.12113711  |
| H | -5.17189209 | 2.11222620  | 4.50775023  |
| H | -3.62607429 | 1.24698508  | 4.71497292  |
| H | -4.27736968 | 7.97848550  | -0.35037889 |

|   |             |             |             |
|---|-------------|-------------|-------------|
| H | -5.11408444 | 7.74821443  | 1.20771260  |
| H | 3.04667783  | 8.36518929  | 0.90709006  |
| H | 2.11316161  | 8.31906149  | 2.42741317  |
| H | -4.27545608 | -3.47320445 | -0.92100246 |
| H | 1.54203162  | -0.46205683 | -3.33331880 |
| H | 4.90342256  | 2.73221280  | -4.23554204 |
| H | 2.94039640  | 4.57446718  | -3.43780478 |
| H | 4.68780277  | 4.86891365  | -3.35894841 |
| H | 3.22109081  | 2.58385183  | -1.97011532 |
| H | 4.49208476  | 5.10651719  | -0.79141708 |
| H | 3.12570078  | 4.81741443  | 1.55185320  |
| H | 3.25121071  | 2.66491584  | 0.55224794  |
| H | 6.14366615  | 3.57980110  | 0.39952992  |
| H | 6.54383182  | 1.59338742  | -0.94314750 |
| H | -2.04125339 | 4.47085183  | -3.38399759 |
| H | -0.92710718 | 6.46606874  | -3.64732904 |
| H | 0.44153661  | 5.52414287  | -4.23815073 |
| H | 0.45551775  | 4.35191874  | -1.94022557 |
| H | -1.01610783 | 6.93346998  | -1.20590623 |
| H | -1.62476612 | 6.17837630  | 1.24774843  |
| H | 0.28457364  | 4.87319580  | 0.61782054  |
| H | 1.16517503  | 7.71542822  | -0.01251344 |
| H | 3.08232926  | 6.64834433  | -1.15442722 |
| H | -5.26723012 | 3.56685920  | -3.51978444 |
| H | -4.09003903 | 1.23041255  | -2.49566745 |
| H | -3.28991801 | 2.31335344  | -3.65329774 |
| H | -2.53155078 | 2.81237377  | -1.39683627 |
| H | -5.50146131 | 3.09695419  | -0.82003006 |
| H | -4.99222092 | 4.18322874  | 2.33558212  |
| H | -3.30464409 | 3.88448596  | 1.10000713  |
| H | -5.01617950 | 5.81193085  | -0.50164843 |
| H | -2.99882874 | 6.37456480  | -1.80722125 |
| H | -6.01393944 | -1.35817610 | -1.74988338 |
| H | -3.94698530 | -0.61187630 | -0.50558810 |
| H | -5.42308064 | -1.86292043 | 1.87364777  |
| H | -3.32053163 | -1.80954270 | 3.48661732  |
| H | -2.89180295 | -0.16994641 | 1.72453101  |
| H | -5.61285971 | 0.56408368  | 2.86042675  |
| H | -6.06233935 | 1.91156813  | 0.96464999  |
| H | -1.17800465 | -4.83775444 | -2.56994300 |
| H | -2.85092617 | -6.48775508 | -1.05086633 |
| H | -1.09275118 | -6.23201668 | -0.98645657 |
| H | -1.83713247 | -3.81110085 | -0.11191657 |
| H | -1.68414333 | -6.42225460 | 1.44323999  |
| H | -0.70911522 | -5.60888792 | 3.86482936  |
| H | -1.56738726 | -3.71513466 | 2.74762098  |
| H | -3.96911625 | -5.56253938 | 2.81302447  |
| H | -5.15211348 | -3.92394096 | 1.44071415  |
| H | 0.47998376  | -3.95909883 | -3.75270715 |
| H | 2.09911826  | -5.52745662 | -2.74576573 |
| H | 2.36433184  | -3.75756640 | -2.63802614 |
| H | 0.98684129  | -3.83659577 | -0.50105075 |
| H | 3.65798044  | -5.33914952 | -0.45601200 |
| H | 4.59040061  | -3.88576487 | 1.60595536  |
| H | 2.19601330  | -3.68402498 | 1.64359566  |
| H | 2.63506388  | -6.68993055 | 1.63942510  |
| H | 0.33788302  | -6.98787773 | 1.05445355  |
| H | 4.22403893  | -0.60605763 | -4.12490078 |

|   |             |             |             |
|---|-------------|-------------|-------------|
| H | 3.06703117  | -1.06047904 | -1.35915881 |
| H | 5.89187187  | -0.15918028 | -2.08958783 |
| H | 6.81480642  | -0.65143344 | 1.21140012  |
| H | 4.88460455  | -1.22160550 | 0.56538187  |
| H | 6.70357648  | -2.64510915 | -1.39996826 |
| H | 4.82281024  | -4.18584292 | -1.78652439 |
| H | -6.35880162 | -2.48917933 | -0.43662285 |
| H | -4.16134752 | -0.38232541 | -4.70822564 |
| H | -5.51895451 | -2.40497030 | -5.17197039 |
| H | -4.39277291 | -2.14861550 | -6.49623994 |
| H | -4.31177878 | -4.49480904 | -5.93403263 |
| H | -4.39794228 | -3.53438267 | -3.18984834 |
| H | -3.34328006 | -4.75202646 | -3.40307712 |
| H | -5.54536560 | -5.47578958 | -2.77490215 |
| H | -5.07594957 | -6.15270041 | -4.35939487 |
| H | -6.20027088 | -4.76967847 | -4.27175863 |
| H | -1.14931489 | 1.25618738  | -5.01250198 |
| H | -0.08279976 | 2.46877128  | -3.18399247 |
| H | -1.54731682 | -2.20918399 | -2.48687794 |
| H | -2.34468116 | -5.87443821 | -6.00630560 |
| H | 0.07128063  | -5.94385053 | -6.51432742 |
| H | 1.43473185  | -3.86429501 | -6.29186566 |
| H | 0.38723536  | -1.77850110 | -5.52222500 |
| H | -2.14247816 | -0.65641048 | -5.88586124 |
| H | -3.78153436 | -1.61493277 | -3.53055682 |



255

2-HP-B-CD:cis-(1R,4R)-SRT\_1\_Cl E(Ha)= -7253.9000078227

|    |             |             |             |
|----|-------------|-------------|-------------|
| Cl | 2.08693560  | 2.11721561  | 3.14332424  |
| Cl | -0.43164706 | 3.98072412  | 2.53754371  |
| O  | -5.79136556 | -0.56998294 | -2.28041197 |
| O  | -3.17330426 | -3.10090896 | -1.85729510 |
| O  | -2.60190331 | -4.53005890 | -3.57604018 |
| O  | 0.64110416  | -5.05390771 | -1.97131966 |
| O  | 2.50361778  | -5.47002057 | -3.29084281 |
| O  | 4.24622392  | -2.87301095 | -1.39340252 |
| O  | 6.04401222  | -1.75053635 | -2.34328280 |
| O  | 4.74732507  | 1.50216120  | -1.26742762 |
| O  | 5.07603682  | 3.33760140  | -2.63991135 |
| O  | 1.91896586  | 4.86593582  | -1.60422390 |
| O  | 0.60717907  | 5.97938851  | -3.14921911 |
| O  | -2.37554083 | 4.71425447  | -1.46302645 |
| O  | -4.35260876 | 4.39133465  | -2.61936673 |
| O  | -3.82973059 | 5.30052278  | 0.87161236  |
| O  | -4.83159103 | 2.66337906  | 1.11669946  |
| O  | -4.56642612 | 1.03980545  | -1.14633352 |
| O  | -1.30238421 | 6.48566796  | 0.47735047  |
| O  | 1.53953873  | 6.79979295  | 0.24486097  |
| O  | -1.62804955 | 6.56100193  | -4.61733647 |
| O  | 3.46177669  | 4.94769842  | 0.80290034  |
| O  | 5.45581055  | 2.88719661  | 0.92342627  |
| O  | 4.33142140  | 5.52913784  | -4.20297754 |
| O  | 5.33989349  | -2.70464340 | 1.05142779  |
| O  | 5.15350582  | 0.22862579  | 1.19170612  |
| O  | 3.78326656  | -4.86110314 | 0.62955777  |
| O  | 1.72617159  | -6.70046537 | 0.04766502  |
| O  | 5.01400006  | -5.01094489 | -4.30519302 |
| O  | -0.89720783 | -5.92752368 | -5.22569900 |
| O  | -3.72143348 | -5.22837437 | -0.17908542 |
| O  | -1.10172098 | -6.29908088 | -0.16541776 |
| O  | -3.89432079 | -2.58604358 | 0.82190225  |
| O  | -5.24428907 | -0.14296070 | 1.30241356  |
| O  | -6.05914373 | -2.93757524 | -3.82051923 |
| O  | -6.41570810 | 2.98396228  | -3.72329763 |
| O  | 7.43717719  | 0.44219845  | -3.38544678 |
| O  | -6.20020473 | -4.13690328 | 0.89214449  |
| O  | -7.41652894 | 1.64525897  | 1.46667995  |
| O  | -3.62011569 | 8.03977426  | 0.25544860  |
| O  | 3.92977892  | 7.73723659  | 1.39504204  |
| O  | 7.16015002  | 1.57227447  | 2.74425480  |
| O  | 3.29108814  | -3.24745088 | 2.91260342  |
| O  | -0.04491154 | -8.72075861 | -0.97499965 |
| N  | 1.47621515  | -4.83080308 | 4.05680345  |
| C  | -0.02493312 | -4.70447688 | 3.83826503  |
| C  | -0.33426257 | -4.30393744 | 2.40461464  |
| C  | -0.16542626 | -2.80634927 | 2.18157874  |
| C  | -1.11257862 | -2.00692662 | 3.08049889  |
| C  | -1.48576514 | -1.63624136 | 5.56183194  |
| C  | -1.48435371 | -2.05273113 | 6.88651392  |
| C  | -1.03155012 | -3.32756281 | 7.21919192  |
| C  | -0.58045116 | -4.16500993 | 6.20970844  |
| C  | -0.56225602 | -3.74464064 | 4.87294619  |
| C  | -1.02730739 | -2.46536093 | 4.53101804  |
| C  | -0.92621014 | -0.51080417 | 2.92724831  |

|   |             |             |             |
|---|-------------|-------------|-------------|
| C | 0.32663867  | 0.07805920  | 3.10361720  |
| C | 0.49958084  | 1.45194771  | 2.97015990  |
| C | -0.60095915 | 2.26988172  | 2.68944886  |
| C | -1.85600039 | 1.69102475  | 2.51912395  |
| C | -2.01274582 | 0.31236101  | 2.62355696  |
| C | 2.10936306  | -6.05063368 | 3.49564077  |
| C | -4.65042881 | -1.33840772 | -2.65943582 |
| C | -4.34101793 | -2.34933640 | -1.55652150 |
| C | -4.11576934 | -1.64977935 | -0.22226346 |
| C | -5.36588001 | -0.83513547 | 0.07537764  |
| C | -5.63717393 | 0.13963855  | -1.07713003 |
| C | -3.37237021 | -4.37908313 | -2.41994315 |
| C | -1.19294700 | -4.37154591 | -3.40036909 |
| C | -0.69320301 | -5.36353659 | -2.35264560 |
| C | -1.51007502 | -5.29438821 | -1.06893426 |
| C | -2.98702633 | -5.43124096 | -1.36850998 |
| C | 1.68274756  | -5.94704696 | -2.26118409 |
| C | 2.50786530  | -6.10927634 | -0.97913345 |
| C | 3.03288731  | -4.74627319 | -0.56556898 |
| C | 3.87977266  | -4.20504045 | -1.71598452 |
| C | 3.11809599  | -4.20461120 | -3.04486138 |
| C | 5.60540326  | -2.53347408 | -1.27650647 |
| C | 5.38581360  | -0.48666550 | -2.49548471 |
| C | 5.50825366  | 0.31136809  | -1.20006551 |
| C | 4.99233640  | -0.48734360 | -0.00729177 |
| C | 5.77141458  | -1.79295137 | 0.05706674  |
| C | 5.44030918  | 2.72086687  | -1.44195467 |
| C | 5.13611861  | 3.61955937  | -0.24032792 |
| C | 3.67704708  | 4.04076710  | -0.24952017 |
| C | 3.31968962  | 4.64240179  | -1.60297554 |
| C | 3.69585231  | 3.70212342  | -2.74594443 |
| C | 1.43352509  | 6.11617146  | -2.02738429 |
| C | 0.66637672  | 6.74426746  | -0.85966569 |
| C | -0.54775101 | 5.88999873  | -0.55327468 |
| C | -1.39130317 | 5.68068710  | -1.80258323 |
| C | -0.55112398 | 5.16076257  | -2.96822530 |
| C | -3.73381667 | 5.04297219  | -1.53876011 |
| C | -4.27859685 | 2.96442795  | -2.59795659 |
| C | -4.84540718 | 2.42784646  | -1.28359487 |
| C | -4.22500713 | 3.11547014  | -0.07518918 |
| C | -4.39519385 | 4.61402776  | -0.22188354 |
| C | -5.09472957 | 2.51396481  | -3.79950651 |
| C | -1.29823275 | 5.23598252  | -4.29012345 |
| C | 3.55254418  | 4.36280486  | -4.10648027 |
| C | 6.08007366  | 0.19814007  | -3.66066984 |
| C | 4.05743709  | -3.98542213 | -4.22125245 |
| C | -0.58803441 | -4.63555496 | -4.76988381 |
| C | -5.01291203 | -2.00737303 | -3.97370806 |
| C | -4.66064827 | 6.26744256  | 1.51363611  |
| C | 1.56654691  | 8.02353742  | 0.97168993  |
| C | 6.09174254  | 3.61126966  | 1.97593472  |
| C | 5.48173041  | -2.34997365 | 2.42675446  |
| C | 1.93842507  | -8.10629811 | 0.23252941  |
| C | -4.95667175 | -5.94268763 | -0.13653139 |
| C | -6.29918444 | -0.34086455 | 2.24913850  |
| C | -5.78532830 | -5.47481530 | 1.05049969  |
| C | 0.62267198  | -8.87254279 | 0.25798577  |
| C | 4.11507051  | -2.07703035 | 3.03422151  |

|   |             |              |             |
|---|-------------|--------------|-------------|
| C | 6.33623088  | 2.65007480   | 3.12990660  |
| C | 2.67776698  | 7.93382505   | 2.00841623  |
| C | -3.97848318 | 7.63053615   | 1.55879061  |
| C | -6.95580041 | 0.98282375   | 2.62609329  |
| C | -7.03053668 | -6.33128961  | 1.19331765  |
| C | -8.12977177 | 0.74224295   | 3.55892216  |
| C | -4.90931379 | 8.66767108   | 2.16132372  |
| C | 2.75416092  | 9.21458390   | 2.81864928  |
| C | 7.01931336  | 3.36223749   | 4.28162960  |
| C | 4.21675909  | -1.72127545  | 4.50141299  |
| C | 0.88029648  | -10.35042524 | 0.49945464  |
| H | 0.28193473  | -4.88126984  | 1.70895926  |
| H | -0.37669672 | -2.56169832  | 1.13573132  |
| H | 0.87658280  | -2.51312149  | 2.36171567  |
| H | -2.13391468 | -2.23185674  | 2.73720012  |
| H | -1.84567568 | -0.64247600  | 5.31324876  |
| H | -1.84500472 | -1.38337804  | 7.66168242  |
| H | -1.04461477 | -3.66808397  | 8.24966369  |
| H | -0.26131459 | -5.17737455  | 6.45973804  |
| H | 1.19460097  | -0.52544795  | 3.35130049  |
| H | -2.71074630 | 2.32730680   | 2.30453030  |
| H | -2.99545158 | -0.12322648  | 2.45722422  |
| H | 3.16729774  | -6.03652244  | 3.75858056  |
| H | 2.02260887  | -6.04478064  | 2.40767216  |
| H | 1.62471609  | -6.93374564  | 3.91526451  |
| H | 1.63105723  | -4.80303192  | 5.06677699  |
| H | 2.01071435  | -4.00773951  | 3.67090512  |
| H | -0.40880783 | -5.71162181  | 4.03922400  |
| H | -1.36771209 | -4.60169039  | 2.19416840  |
| H | 5.94803746  | -0.41800615  | -4.56223341 |
| H | -3.87603201 | 6.11710945   | -1.69830570 |
| H | -5.46619548 | 4.84483514   | -0.29525575 |
| H | -3.14965086 | 2.88753633   | -0.05665556 |
| H | -4.76705192 | 1.68734329   | 1.11284929  |
| H | -5.93117989 | 2.59703732   | -1.28980559 |
| H | -3.23418850 | 2.63622752   | -2.69761845 |
| H | -5.14378206 | 1.42158601   | -3.81569402 |
| H | 2.26042403  | 6.76193987   | -2.34152415 |
| H | 0.35209080  | 7.75605661   | -1.15077105 |
| H | -0.18386993 | 4.90586323   | -0.22589074 |
| H | -2.03256192 | 5.87164879   | 0.69169055  |
| H | -1.86411140 | 6.62431247   | -2.10792249 |
| H | -0.25102686 | 4.12517952   | -2.75575123 |
| H | -0.68577057 | 4.76041851   | -5.07154846 |
| H | -2.23812476 | 4.68293983   | -4.20369176 |
| H | -0.79612926 | 7.04802489   | -4.64558666 |
| H | 6.51645865  | 2.53266818   | -1.51837493 |
| H | 5.77122407  | 4.51359821   | -0.31045738 |
| H | 3.06181788  | 3.13896427   | -0.10433131 |
| H | 2.57873509  | 5.34581715   | 0.67669645  |
| H | 3.85988697  | 5.58916272   | -1.73535953 |
| H | 3.06504717  | 2.80351822   | -2.69594735 |
| H | 3.81501657  | 3.62906109   | -4.88356004 |
| H | 2.51001961  | 4.65940002   | -4.25348236 |
| H | 5.24786595  | 5.26237327   | -4.06725142 |
| H | 6.22967025  | -3.43482893  | -1.29061830 |
| H | 6.83735725  | -1.56681828  | 0.20643987  |
| H | 3.92940848  | -0.72056614  | -0.17181809 |

|   |             |             |             |
|---|-------------|-------------|-------------|
| H | 4.93847947  | 1.16952918  | 1.01901772  |
| H | 6.56975815  | 0.54509027  | -1.04132298 |
| H | 4.32268916  | -0.64059290 | -2.72828736 |
| H | 5.60884587  | 1.16928363  | -3.83621793 |
| H | 1.29102583  | -6.91453580 | -2.59421836 |
| H | 3.36691800  | -6.75459290 | -1.20047348 |
| H | 2.18413414  | -4.06442608 | -0.41498541 |
| H | 4.49322594  | -4.18746427 | 0.60446580  |
| H | 4.77565855  | -4.83158911 | -1.83563579 |
| H | 2.35610608  | -3.41351918 | -3.00893846 |
| H | 3.45997340  | -3.90335719 | -5.14094860 |
| H | 4.60291693  | -3.04841384 | -4.07921721 |
| H | 4.52512717  | -5.82840714 | -4.45453365 |
| H | -4.41340085 | -4.49313012 | -2.74138202 |
| H | -3.18503682 | -6.43452592 | -1.77281828 |
| H | -1.34663285 | -4.30068346 | -0.62386241 |
| H | -0.12994363 | -6.23073299 | -0.09122200 |
| H | -0.74628464 | -6.37358781 | -2.78128793 |
| H | -0.96580103 | -3.34844539 | -3.07078832 |
| H | 0.50188994  | -4.57258012 | -4.70185618 |
| H | -0.93763376 | -3.85814064 | -5.46517981 |
| H | -1.85833027 | -5.97464536 | -5.28636485 |
| H | -6.58347782 | 0.66158627  | -0.90087716 |
| H | -6.21686788 | -1.52642072 | 0.12485958  |
| H | -3.25094905 | -0.97615605 | -0.29942668 |
| H | -3.54153406 | -3.39754947 | 0.41108163  |
| H | -5.20292758 | -3.02100216 | -1.44914082 |
| H | -3.78062760 | -0.68209615 | -2.80635250 |
| H | -4.14682428 | -2.55803771 | -4.35227730 |
| H | -5.26646804 | -1.22611556 | -4.70460054 |
| H | -6.82300433 | -2.44703238 | -3.49488094 |
| H | -6.35601076 | 3.94550714  | -3.67541683 |
| H | 7.85743385  | -0.41724042 | -3.26852435 |
| H | -4.74247588 | -7.01809540 | -0.05732347 |
| H | -5.53537814 | -5.76731181 | -1.05455299 |
| H | 2.49847232  | -8.25555636 | 1.16587114  |
| H | 2.54172615  | -8.50128993 | -0.59287384 |
| H | 6.12310172  | -1.47277072 | 2.54009543  |
| H | 5.94611933  | -3.20624803 | 2.93169839  |
| H | 5.45398518  | 4.44488586  | 2.29080406  |
| H | 7.05476369  | 4.00311156  | 1.61779106  |
| H | 0.59319036  | 8.19458549  | 1.44867575  |
| H | 1.78416730  | 8.85449078  | 0.28496376  |
| H | -4.89067195 | 5.91201844  | 2.52608714  |
| H | -5.60345159 | 6.37047454  | 0.96217429  |
| H | -5.87783520 | -0.83031398 | 3.13630118  |
| H | -7.05773194 | -1.00705528 | 1.82175499  |
| H | -5.16360947 | -5.58324666 | 1.95539012  |
| H | -6.20712794 | 1.60592395  | 3.13944196  |
| H | -3.07781521 | 7.54541920  | 2.18685445  |
| H | 2.43837068  | 7.09280011  | 2.68212820  |
| H | 5.35038308  | 2.28098468  | 3.46615577  |
| H | 3.65691755  | -1.24859225 | 2.48031193  |
| H | 0.00185387  | -8.47403860 | 1.07681378  |
| H | 6.41333317  | 4.19356729  | 4.65265431  |
| H | 7.99216611  | 3.74911252  | 3.96320128  |
| H | 7.18915274  | 2.66000952  | 5.10105724  |
| H | 4.78760888  | -0.79727451 | 4.62615694  |

|   |             |              |             |
|---|-------------|--------------|-------------|
| H | 4.71409634  | -2.51705403  | 5.06584819  |
| H | 3.22352363  | -1.55921422  | 4.93106924  |
| H | 1.41388030  | -10.52400560 | 1.43920950  |
| H | 1.47205909  | -10.76894800 | -0.32058850 |
| H | -0.06943821 | -10.88818360 | 0.53333291  |
| H | -6.78050886 | -7.38346748  | 1.35663372  |
| H | -7.65075547 | -6.25244466  | 0.29487015  |
| H | -7.62176245 | -5.97675231  | 2.04027983  |
| H | -7.82646915 | 0.19777044   | 4.45883170  |
| H | -8.90537568 | 0.16471559   | 3.04615254  |
| H | -8.56597072 | 1.69696651   | 3.86053382  |
| H | -5.24338060 | 8.37711586   | 3.16229848  |
| H | -5.78920416 | 8.79963170   | 1.52356110  |
| H | -4.39800664 | 9.63024503   | 2.23068795  |
| H | 1.81187216  | 9.42031744   | 3.33487215  |
| H | 2.99078139  | 10.06077858  | 2.16595150  |
| H | 3.54988125  | 9.13180499   | 3.56222164  |
| H | -5.43332196 | -3.55946072  | 1.04718703  |
| H | -6.72151543 | 2.27448441   | 1.22196417  |
| H | -2.71094770 | 7.73173624   | 0.11942484  |
| H | 3.96080701  | 6.82476310   | 1.07201399  |
| H | 6.68393805  | 1.06602496   | 2.07111216  |
| H | 3.38804369  | -3.64466800  | 2.02495455  |
| H | -0.68215720 | -7.99895015  | -0.85820949 |
| H | -4.59007305 | 2.85379795   | -4.71660891 |

2-HP-B-CD:cis-(1R,4R)-SRT\_2\_CI E(Ha)= -7253.8951936597

|    |             |             |             |
|----|-------------|-------------|-------------|
| Cl | -5.95566898 | -8.50966099 | 3.62305365  |
| Cl | -4.74029897 | -5.57229983 | 3.29176721  |
| O  | -4.88695791 | -0.87957395 | -3.11613263 |
| O  | -1.53601665 | -2.36072210 | -3.00951103 |
| O  | -0.51037491 | -3.16928973 | -4.91702764 |
| O  | 2.71428393  | -2.51582164 | -3.32892679 |
| O  | 4.55135823  | -1.70427505 | -4.47623130 |
| O  | 5.30738333  | 0.31258503  | -1.54479697 |
| O  | 6.71735321  | 2.14540556  | -1.44149894 |
| O  | 4.09611427  | 4.10985038  | 0.19923148  |
| O  | 3.92010689  | 6.36212407  | -0.31606162 |
| O  | 0.28470062  | 6.34591178  | 0.08222270  |
| O  | -1.08418532 | 7.41308905  | -1.43321844 |
| O  | -3.62378257 | 4.89500127  | -0.68850908 |
| O  | -5.12576473 | 4.29614771  | -2.34224244 |
| O  | -5.55120975 | 4.39540369  | 1.27281724  |
| O  | -5.57695616 | 1.58387452  | 0.76023154  |
| O  | -4.29789628 | 0.80655393  | -1.63715157 |
| O  | -3.51110831 | 6.32759652  | 1.73796764  |
| O  | -0.98716166 | 7.57511826  | 2.19908688  |
| O  | -3.19693310 | 7.66355876  | -3.15635025 |
| O  | 1.18286108  | 5.83661369  | 2.73655890  |
| O  | 3.76556507  | 4.57685544  | 2.82200451  |
| O  | 2.58318770  | 8.67232893  | -1.28758591 |
| O  | 5.85792641  | -0.32318614 | 1.02035770  |
| O  | 4.54493631  | 2.09900027  | 2.09399279  |
| O  | 5.74552641  | -2.43989182 | -0.56721017 |
| O  | 4.31215764  | -4.34655959 | -1.99647952 |
| O  | 6.70338774  | -0.06572114 | -4.96267649 |
| O  | 1.68353917  | -3.46344962 | -6.65165829 |
| O  | -1.10918676 | -4.80714154 | -1.70773394 |
| O  | 1.68260330  | -4.56630479 | -1.68986194 |
| O  | -2.36834923 | -2.68276995 | -0.35626016 |
| O  | -4.48107842 | -1.00070726 | 0.51209988  |
| O  | -4.31154768 | -2.86730523 | -5.06519471 |
| O  | -6.31241175 | 2.65544678  | -4.16545716 |
| O  | 7.34799249  | 4.85592928  | -1.16386288 |
| O  | -3.89873115 | -4.93412015 | -0.80136197 |
| O  | -7.25017586 | -0.68639128 | 0.70946000  |
| O  | -6.13957569 | 7.15588046  | 1.28441838  |
| O  | 1.46104362  | 8.52065265  | 3.42690585  |
| O  | 5.60220737  | 3.23792705  | 4.50763863  |
| O  | 3.92557218  | -2.32388038 | 1.90020866  |
| O  | 3.06719504  | -7.02882346 | -2.09600473 |
| N  | 0.81728256  | -4.70640205 | 0.92595705  |
| C  | 0.74741445  | -3.29723138 | 1.39119908  |
| C  | -2.02730430 | -9.17274133 | 3.33991867  |
| C  | -3.39874422 | -9.35037723 | 3.47456783  |
| C  | -4.25924206 | -8.25505264 | 3.45878975  |
| C  | -3.72429402 | -6.96922511 | 3.31510850  |
| C  | -2.34857004 | -6.80155843 | 3.18837981  |
| C  | -1.48346202 | -7.89640509 | 3.19166768  |
| C  | 0.60190955  | -6.55100168 | 3.74140839  |
| C  | 1.46621807  | -5.60640570 | 3.16704930  |
| C  | 2.10737413  | -4.65694348 | 3.97347721  |
| C  | 1.86554994  | -4.60884062 | 5.33921690  |

|   |             |             |             |
|---|-------------|-------------|-------------|
| C | 0.98274794  | -5.52352544 | 5.91143077  |
| C | 0.36929104  | -6.48539175 | 5.12024316  |
| C | 0.00223689  | -7.70620975 | 2.95349136  |
| C | 0.27930834  | -7.63250139 | 1.44038651  |
| C | 1.64031810  | -7.02981805 | 1.11241275  |
| C | 1.75892966  | -5.62438507 | 1.68996097  |
| C | -3.55729149 | -1.11193021 | -3.57016743 |
| C | -2.89936955 | -2.14137321 | -2.65641907 |
| C | -2.92751751 | -1.68612217 | -1.20492223 |
| C | -4.37903722 | -1.43102790 | -0.82693578 |
| C | -4.97952412 | -0.40292154 | -1.79330285 |
| C | -1.23707932 | -3.50460815 | -3.76998249 |
| C | 0.70765585  | -2.46580602 | -4.67279161 |
| C | 1.61201072  | -3.29222291 | -3.75769840 |
| C | 0.86874667  | -3.72749547 | -2.50354713 |
| C | -0.40506753 | -4.45207919 | -2.88677492 |
| C | 4.00315847  | -2.80655383 | -3.82629487 |
| C | 4.87108291  | -3.20773074 | -2.63358480 |
| C | 4.94363146  | -2.05169412 | -1.65443615 |
| C | 5.48166582  | -0.81902241 | -2.38211748 |
| C | 4.71169098  | -0.52940932 | -3.67456804 |
| C | 6.41404836  | 0.89454190  | -0.90467564 |
| C | 5.67171799  | 3.11933549  | -1.35191811 |
| C | 5.24184498  | 3.28146755  | 0.10404950  |
| C | 4.87726356  | 1.94112781  | 0.73603741  |
| C | 6.07004411  | 1.00565615  | 0.58796346  |
| C | 4.26801284  | 5.43076367  | 0.66551055  |
| C | 3.41226951  | 5.60665100  | 1.92390119  |
| C | 1.93352561  | 5.55641030  | 1.57446901  |
| C | 1.63762239  | 6.54538236  | 0.45570207  |
| C | 2.55523642  | 6.30771610  | -0.74106782 |
| C | -0.51539213 | 7.48128094  | -0.15782959 |
| C | -1.59890932 | 7.52845446  | 0.92839386  |
| C | -2.45718736 | 6.28578802  | 0.80758627  |
| C | -2.99963574 | 6.16717052  | -0.61314848 |
| C | -1.90189736 | 6.26418052  | -1.67092386 |
| C | -4.97663095 | 4.79868587  | -1.03824314 |
| C | -4.53522396 | 3.01573738  | -2.56766485 |
| C | -5.06641160 | 2.00250172  | -1.55588918 |
| C | -4.97530667 | 2.50490247  | -0.11895725 |
| C | -5.64860471 | 3.86030523  | -0.02723388 |
| C | -4.91945810 | 2.65660211  | -3.99480630 |
| C | -2.46743805 | 6.46684445  | -3.06755647 |
| C | 2.40377002  | 7.37800930  | -1.80758122 |
| C | 6.25753793  | 4.39886313  | -1.92505185 |
| C | 5.46262935  | 0.45314580  | -4.56001961 |
| C | 1.34789873  | -2.24568008 | -6.03312788 |
| C | -3.67875887 | -1.61044574 | -4.99987683 |
| C | -6.75975742 | 4.89616712  | 1.84219962  |
| C | -0.81353664 | 8.89767782  | 2.70257971  |
| C | 3.91310909  | 4.94869920  | 4.19118699  |
| C | 5.56446964  | -0.58618278 | 2.39439449  |
| C | 5.01258124  | -5.56785927 | -2.24262753 |
| C | -1.98011983 | -5.93336509 | -1.88658125 |
| C | -5.23758342 | -1.83532116 | 1.39048090  |
| C | -2.99722994 | -6.01000853 | -0.75554711 |
| C | 4.31876798  | -6.71115943 | -1.52225832 |
| C | 4.12601654  | -1.05907696 | 2.53236871  |

|   |             |              |             |
|---|-------------|--------------|-------------|
| C | 4.36199011  | 3.72116427   | 4.97077819  |
| C | 0.16990629  | 8.88572490   | 3.86240124  |
| C | -6.57462442 | 6.32474571   | 2.34064576  |
| C | -6.52987218 | -1.15063924  | 1.83372544  |
| C | -3.79718649 | -7.29662755  | -0.85763975 |
| C | -7.39868821 | -2.12045953  | 2.61424646  |
| C | -7.88310366 | 6.86822383   | 2.88668635  |
| C | 0.26252973  | 10.26420072  | 4.49129664  |
| C | 4.51852791  | 4.05395159   | 6.44257608  |
| C | 3.74033955  | -1.19616139  | 3.99182311  |
| C | 5.16626987  | -7.96852372  | -1.58018108 |
| H | 0.40456391  | -3.28007243  | 2.42520895  |
| H | 1.74605281  | -2.85418114  | 1.33463243  |
| H | 0.03002672  | -2.76557337  | 0.76319679  |
| H | -1.37548713 | -10.04231913 | 3.35416027  |
| H | -3.81824831 | -10.34339787 | 3.59583485  |
| H | -1.95801421 | -5.79080883  | 3.11217358  |
| H | 2.81002290  | -3.96389720  | 3.51442921  |
| H | 2.36952374  | -3.87068895  | 5.95575895  |
| H | 0.78537962  | -5.49800827  | 6.97892801  |
| H | -0.30004846 | -7.21033528  | 5.57576371  |
| H | 0.50714837  | -8.60883275  | 3.32662224  |
| H | -0.52379313 | -7.05977547  | 0.95407282  |
| H | 0.19905614  | -8.63596794  | 1.01139058  |
| H | 1.82766108  | -7.04065196  | 0.03198424  |
| H | 2.43457670  | -7.63084469  | 1.56975891  |
| H | 2.75102495  | -5.19896903  | 1.50590431  |
| H | 1.11090647  | -4.70806415  | -0.08175441 |
| H | -0.12153084 | -5.10816473  | 0.94287422  |
| H | -2.97504430 | -0.17924099  | -3.54911499 |
| H | -3.45870814 | -3.08281173  | -2.73610881 |
| H | -2.35861741 | -0.75330505  | -1.09473174 |
| H | -4.94592298 | -2.36078813  | -0.96448357 |
| H | -6.04797595 | -0.29423393  | -1.58579138 |
| H | -2.15749417 | -3.97785540  | -4.12886627 |
| H | 0.49760333  | -1.50073584  | -4.19257375 |
| H | 1.95039916  | -4.17698400  | -4.31475123 |
| H | 0.60365146  | -2.82423111  | -1.93675788 |
| H | -0.15392292 | -5.35642570  | -3.45908140 |
| H | 3.95026698  | -3.60545368  | -4.57508635 |
| H | 5.88358872  | -3.44276872  | -2.98461142 |
| H | 3.92192157  | -1.81097791  | -1.32076759 |
| H | 6.54293402  | -0.96476016  | -2.62804483 |
| H | 3.72613426  | -0.12602793  | -3.40546364 |
| H | 7.31130846  | 0.28005201   | -1.04403547 |
| H | 4.80597813  | 2.80072507   | -1.94937776 |
| H | 6.07844870  | 3.72327201   | 0.66215559  |
| H | 4.02780318  | 1.51108203   | 0.18497260  |
| H | 6.93144528  | 1.43511294   | 1.12068376  |
| H | 5.32323925  | 5.61615232   | 0.89240315  |
| H | 3.64494574  | 6.58763738   | 2.36108009  |
| H | 1.69884553  | 4.54400376   | 1.21131631  |
| H | 1.78724460  | 7.56646092   | 0.83072728  |
| H | 2.33647630  | 5.32112554   | -1.17354593 |
| H | 0.09972494  | 8.38796492   | -0.15172721 |
| H | -2.22780349 | 8.41680993   | 0.77399122  |
| H | -1.81845845 | 5.41038220   | 0.99757892  |
| H | -3.72967090 | 6.96708025   | -0.79841440 |



|   |             |             |             |
|---|-------------|-------------|-------------|
| H | -1.28893232 | 5.35314000  | -1.63423993 |
| H | -5.46179335 | 5.78048364  | -1.02337342 |
| H | -3.44210604 | 3.07934630  | -2.46985509 |
| H | -6.11612284 | 1.79506201  | -1.80503942 |
| H | -3.91464056 | 2.63196784  | 0.13863612  |
| H | -6.70334277 | 3.75398458  | -0.31320829 |
| H | -4.42246876 | 3.35827669  | -4.68223118 |
| H | -4.56668881 | 1.64640271  | -4.22067795 |
| H | -1.63847349 | 6.43713312  | -3.79139276 |
| H | -3.15895619 | 5.65160428  | -3.29914165 |
| H | 3.11062188  | 7.16197955  | -2.62265836 |
| H | 1.38981119  | 7.33451139  | -2.21603753 |
| H | 6.53556294  | 4.21923357  | -2.97399388 |
| H | 5.49702091  | 5.18440230  | -1.90036975 |
| H | 4.82742288  | 0.71641665  | -5.41859181 |
| H | 5.66402681  | 1.36396502  | -3.98935162 |
| H | 2.27738621  | -1.68300209 | -5.90415464 |
| H | 0.66577265  | -1.64374241 | -6.64981706 |
| H | -2.67996326 | -1.73394606 | -5.42888601 |
| H | -4.21361791 | -0.85252671 | -5.58945432 |
| H | -7.06308597 | 4.23185766  | 2.66166337  |
| H | -7.55495321 | 4.89653983  | 1.08607904  |
| H | -1.78951633 | 9.28932997  | 3.02266345  |
| H | -0.41038563 | 9.55598080  | 1.91934030  |
| H | 2.96009585  | 5.32941571  | 4.57680184  |
| H | 4.67879279  | 5.73288072  | 4.27683004  |
| H | 5.73157193  | 0.30726774  | 2.99926913  |
| H | 6.24729992  | -1.37966246 | 2.72338702  |
| H | 6.03973379  | -5.46039947 | -1.87224566 |
| H | 5.04019379  | -5.78335826 | -3.32033838 |
| H | -1.36820068 | -6.84586432 | -1.92730097 |
| H | -2.53084080 | -5.84068398 | -2.83120858 |
| H | -4.60807140 | -2.06411957 | 2.25919424  |
| H | -5.47607299 | -2.78130420 | 0.88847349  |
| H | -2.44921200 | -6.01350165 | 0.20551876  |
| H | 4.19894319  | -6.40441279 | -0.46749852 |
| H | 3.48766267  | -0.29842453 | 2.06029164  |
| H | 3.57775935  | 2.95187978  | 4.85454393  |
| H | -0.20347596 | 8.16879607  | 4.61232873  |
| H | -5.82310901 | 6.31538809  | 3.14551935  |
| H | -6.26445300 | -0.30092373 | 2.48089772  |
| H | -3.15614714 | -8.18013512 | -0.78734493 |
| H | -4.34106724 | -7.32954203 | -1.80672270 |
| H | -4.53034843 | -7.32989912 | -0.04926004 |
| H | -6.86273865 | -2.53962559 | 3.47239062  |
| H | -7.71919327 | -2.94280050 | 1.96668357  |
| H | -8.29274490 | -1.61119580 | 2.98050315  |
| H | -8.27688669 | 6.23971069  | 3.69154591  |
| H | -8.63039401 | 6.92339208  | 2.08853157  |
| H | -7.73224381 | 7.87777702  | 3.27510529  |
| H | -0.70534755 | 10.59691618 | 4.87713557  |
| H | 0.61826429  | 10.99379334 | 3.75668186  |
| H | 0.97879000  | 10.24236519 | 5.31548700  |
| H | 3.57877978  | 4.40948798  | 6.87462689  |
| H | 5.28267874  | 4.82583944  | 6.57633474  |
| H | 4.84106643  | 3.16465756  | 6.98880237  |
| H | 3.79651610  | -0.22639462 | 4.49410990  |
| H | 4.40613901  | -1.89771868 | 4.50589416  |

|   |             |             |             |
|---|-------------|-------------|-------------|
| H | 2.71492123  | -1.56561417 | 4.08231213  |
| H | 6.12631019  | -7.82690974 | -1.07685318 |
| H | 5.34906798  | -8.25795956 | -2.61946410 |
| H | 4.63524084  | -8.78984160 | -1.09382148 |
| H | -5.01497619 | 0.78585311  | 0.74472492  |
| H | -4.01972654 | 5.49967207  | 1.63357288  |
| H | -2.59093349 | 8.36945457  | -2.90236993 |
| H | 0.29653767  | 6.13819396  | 2.46073620  |
| H | 3.47339722  | 8.70758678  | -0.91915004 |
| H | 4.01314416  | 2.91745779  | 2.18328533  |
| H | 5.94500071  | -1.63226765 | -0.04879215 |
| H | 6.51604809  | -0.85896499 | -5.47716066 |
| H | 0.85644310  | -3.92461910 | -6.83106284 |
| H | 2.62486421  | -4.26935273 | -1.76311761 |
| H | -1.75813033 | -3.20236514 | -0.91029442 |
| H | -5.19963716 | -2.75047808 | -4.70750937 |
| H | -6.61295843 | 3.53662122  | -3.91273683 |
| H | 8.02535143  | 4.17178873  | -1.21072156 |
| H | -3.44710894 | -4.13850001 | -0.46789472 |
| H | -7.00584690 | 0.24373682  | 0.59247730  |
| H | -5.17101421 | 7.16528482  | 1.33215129  |
| H | 1.46404612  | 7.55766459  | 3.29615416  |
| H | 5.47056878  | 2.89900469  | 3.61070974  |
| H | 4.47606529  | -2.38531151 | 1.10274569  |
| H | 2.50783165  | -6.23883886 | -2.10463564 |

2-HP-B-CD:cis-(1R,4R)-SRT\_3\_C1 E(Ha)= -7253.8909898488

|    |             |              |             |
|----|-------------|--------------|-------------|
| Cl | 2.26515414  | -4.94786331  | -6.06491461 |
| Cl | -0.67691633 | -5.46739551  | -4.94560754 |
| O  | -5.69163501 | 0.18264117   | -1.70187069 |
| O  | -3.75041478 | -1.89002493  | 0.61142647  |
| O  | -3.23522890 | -4.05095667  | -0.05546782 |
| O  | 0.22854262  | -3.45032829  | 0.97268369  |
| O  | 1.85531323  | -4.32471859  | -0.42750226 |
| O  | 4.02136268  | -1.43271058  | 0.17148176  |
| O  | 5.41920221  | -0.70725894  | -1.52634000 |
| O  | 4.80460837  | 2.79818138   | -0.67464572 |
| O  | 4.89072040  | 4.39324095   | -2.35198842 |
| O  | 1.88955605  | 5.98479057   | -1.00410686 |
| O  | 0.57148111  | 7.28437551   | -2.39622096 |
| O  | -2.43547361 | 5.55140762   | -1.22120137 |
| O  | -4.03112683 | 4.91628543   | -2.76310789 |
| O  | -4.34033795 | 6.71182788   | 0.38475848  |
| O  | -5.80124739 | 4.31674640   | 0.91814411  |
| O  | -4.99387293 | 2.10814268   | -0.61842005 |
| O  | -1.57924183 | 6.90936248   | 1.12274422  |
| O  | 1.18456840  | 7.55662050   | 1.18032938  |
| O  | -1.77441203 | 7.79955398   | -3.89901058 |
| O  | 3.75688745  | 6.43666582   | 1.06434166  |
| O  | 5.91295537  | 4.51347773   | 1.11379598  |
| O  | 4.02444986  | 6.35258063   | -4.03774920 |
| O  | 5.93563566  | -0.98214069  | 2.03961224  |
| O  | 6.15227666  | 1.85603773   | 1.64308971  |
| O  | 3.91352812  | -2.62957929  | 2.75356740  |
| O  | 1.64505278  | -4.30398614  | 3.19603100  |
| O  | 4.05918634  | -4.32981519  | -2.09705372 |
| O  | -1.74414783 | -6.09828796  | -0.87753429 |
| O  | -3.85778514 | -2.74648210  | 3.29415019  |
| O  | -1.14681205 | -3.64654762  | 3.43796955  |
| O  | -5.69716120 | -0.77965550  | 2.30938759  |
| O  | -6.82406376 | 1.68851671   | 1.40786913  |
| O  | -5.57014363 | -2.43160557  | -2.51699864 |
| O  | -5.73464068 | 3.17237658   | -4.04528374 |
| O  | 6.50541473  | 0.99808776   | -3.39116337 |
| O  | -6.54860091 | -3.37468294  | 2.90632440  |
| O  | -8.48247919 | 3.74475543   | 0.41190981  |
| O  | -2.94319227 | 9.25658146   | 0.58255954  |
| O  | 3.41079336  | 9.23537962   | 0.88983024  |
| O  | 8.37458000  | 3.63972090   | 2.20103113  |
| O  | 6.62395105  | -3.23332122  | 3.59179467  |
| O  | -0.36594449 | -6.25714179  | 3.46304001  |
| N  | -1.05994392 | -7.86676323  | 1.26610469  |
| C  | -2.48148221 | -8.09098016  | 1.61438228  |
| C  | 2.84442759  | -7.67903542  | -3.21143027 |
| C  | 3.05284281  | -6.76601880  | -4.23779426 |
| C  | 1.97873077  | -6.06729869  | -4.78677749 |
| C  | 0.69136524  | -6.29502561  | -4.28779380 |
| C  | 0.49257325  | -7.19806497  | -3.24570151 |
| C  | 1.56402754  | -7.90242595  | -2.69760103 |
| C  | 0.08833981  | -9.59866817  | -1.46097066 |
| C  | -0.64920267 | -9.79479071  | -0.27913548 |
| C  | -1.74486933 | -10.66837851 | -0.28283430 |
| C  | -2.15026159 | -11.30963092 | -1.44493653 |

|   |             |              |             |
|---|-------------|--------------|-------------|
| C | -1.43986611 | -11.09425290 | -2.62324872 |
| C | -0.32949761 | -10.26055221 | -2.62099592 |
| C | 1.38759775  | -8.80885369  | -1.49401002 |
| C | 1.61442549  | -7.98764377  | -0.21854490 |
| C | 1.23087491  | -8.76394463  | 1.03262059  |
| C | -0.24649395 | -9.12703918  | 1.01437105  |
| C | -4.57989876 | -0.60424652  | -1.27907738 |
| C | -4.89377334 | -1.21729943  | 0.08271582  |
| C | -5.30990733 | -0.16400044  | 1.10135004  |
| C | -6.46350937 | 0.64467873   | 0.53841496  |
| C | -6.05536037 | 1.22180565   | -0.82331433 |
| C | -3.87254576 | -3.24092855  | 0.91610779  |
| C | -1.85503670 | -3.76270694  | -0.25431418 |
| C | -1.10221649 | -3.92071002  | 1.06177799  |
| C | -1.75072204 | -3.20004623  | 2.23498793  |
| C | -3.23693776 | -3.50387025  | 2.28734737  |
| C | 1.26276496  | -4.39079111  | 0.83279292  |
| C | 2.28693521  | -4.16303603  | 1.94312653  |
| C | 2.93339659  | -2.80397775  | 1.77102483  |
| C | 3.53129992  | -2.74534121  | 0.36231239  |
| C | 2.50437062  | -3.07597036  | -0.72271379 |
| C | 5.35743098  | -1.25998173  | -0.24489238 |
| C | 4.85780660  | 0.60365871   | -1.66656253 |
| C | 5.50706676  | 1.56621282   | -0.67366535 |
| C | 5.45999438  | 1.02316183   | 0.75020409  |
| C | 6.06547737  | -0.36782363  | 0.77809608  |
| C | 5.45061007  | 3.95260195   | -1.14739721 |
| C | 5.34106094  | 5.03200572   | -0.06469175 |
| C | 3.88191499  | 5.40107574   | 0.11915391  |
| C | 3.28100972  | 5.81385548   | -1.21834600 |
| C | 3.50819182  | 4.75767883   | -2.29766643 |
| C | 1.31846565  | 7.24898755   | -1.20783567 |
| C | 0.42228858  | 7.56170589   | -0.00666686 |
| C | -0.71725451 | 6.55824030   | 0.06164794  |
| C | -1.44901780 | 6.57296728   | -1.27480965 |
| C | -0.49575515 | 6.33656920   | -2.44451231 |
| C | -3.70042355 | 5.84038012   | -1.76225628 |
| C | -4.06578185 | 3.55404506   | -2.33663769 |
| C | -5.06504159 | 3.40903138   | -1.19137532 |
| C | -4.79093779 | 4.39354546   | -0.05934623 |
| C | -4.72448883 | 5.80154837   | -0.62027143 |
| C | -4.47580919 | 2.76699021   | -3.57050086 |
| C | -1.16642839 | 6.53512304   | -3.79260324 |
| C | 3.18763278  | 5.28058210   | -3.68930154 |
| C | 5.12889733  | 0.99676437   | -3.10965441 |
| C | 3.14207601  | -3.26287570  | -2.09043369 |
| C | -1.39334265 | -4.77398352  | -1.29025681 |
| C | -4.41067205 | -1.65405854  | -2.36564164 |
| C | -4.97478980 | 7.98434558   | 0.27706858  |
| C | 1.26471728  | 8.78774926   | 1.89708056  |
| C | 6.74697382  | 5.39498744   | 1.86004266  |
| C | 7.09480851  | -0.97277081  | 2.87051611  |
| C | 1.90851799  | -5.51756805  | 3.88228955  |
| C | -4.57935571 | -3.46459191  | 4.29410791  |
| C | -8.20472864 | 1.77262004   | 1.75635306  |
| C | -6.07480477 | -3.16622630  | 4.22221021  |
| C | 0.62938876  | -6.08898643  | 4.47857204  |
| C | 6.85253836  | -1.91567026  | 4.04057859  |

|   |              |              |             |
|---|--------------|--------------|-------------|
| C | 7.54277807   | 4.56696734   | 2.85962953  |
| C | 2.72117754   | 9.18240843   | 2.12193337  |
| C | -4.22610783  | 9.01216667   | 1.11201930  |
| C | -8.66938969  | 3.22227626   | 1.70863451  |
| C | -6.84149049  | -4.06149174  | 5.17865645  |
| C | -10.14156516 | 3.31851969   | 2.06816897  |
| C | -4.98294993  | 10.32858274  | 1.12830128  |
| C | 2.80388469   | 10.54443681  | 2.78712239  |
| C | 8.42838364   | 5.46402210   | 3.70457168  |
| C | 8.06016629   | -1.94008226  | 4.95883542  |
| C | 0.88121822   | -7.41921776  | 5.15852659  |
| H | -2.97655770  | -8.61964224  | 0.80022623  |
| H | -2.54094359  | -8.67336414  | 2.53462741  |
| H | -2.95636632  | -7.12089180  | 1.76856190  |
| H | 3.69404504   | -8.22548955  | -2.80908402 |
| H | 4.04878820   | -6.58911897  | -4.62900009 |
| H | -0.51369371  | -7.34086737  | -2.86440079 |
| H | -2.26980256  | -10.86996289 | 0.64842010  |
| H | -3.00007288  | -11.98460273 | -1.42833154 |
| H | -1.73816434  | -11.59317431 | -3.54023076 |
| H | 0.23685105   | -10.12070221 | -3.53750427 |
| H | 2.18956539   | -9.56137190  | -1.53906121 |
| H | 1.03617153   | -7.05897701  | -0.29805935 |
| H | 2.66289888   | -7.67737315  | -0.16954281 |
| H | 1.47303216   | -8.20049412  | 1.94134657  |
| H | 1.79972641   | -9.69935977  | 1.08322792  |
| H | -0.48646359  | -9.77939961  | 1.86115188  |
| H | -0.63413557  | -7.32960106  | 2.05851466  |
| H | -1.05397769  | -7.25250725  | 0.42698459  |
| H | -3.67681199  | 0.01820349   | -1.20464009 |
| H | -5.71325523  | -1.93483165  | -0.05800505 |
| H | -4.46374238  | 0.51551088   | 1.27644659  |
| H | -7.31557746  | -0.02959456  | 0.37697122  |
| H | -6.90669569  | 1.72947127   | -1.28868238 |
| H | -4.91871985  | -3.56088713  | 0.93550169  |
| H | -1.71712957  | -2.74216481  | -0.63482500 |
| H | -1.09997142  | -4.99278080  | 1.30396261  |
| H | -1.61791077  | -2.11682454  | 2.11886960  |
| H | -3.36520795  | -4.57634119  | 2.49534228  |
| H | 0.85308457   | -5.40349555  | 0.92400050  |
| H | 3.07513404   | -4.92114292  | 1.84083830  |
| H | 2.15897945   | -2.02479421  | 1.84937756  |
| H | 4.35031147   | -3.47534585  | 0.29525129  |
| H | 1.75719269   | -2.27163755  | -0.76391736 |
| H | 5.86013309   | -2.23112673  | -0.31174984 |
| H | 3.77560919   | 0.57079633   | -1.47734713 |
| H | 6.55300303   | 1.72029372   | -0.97207909 |
| H | 4.40298281   | 0.93896812   | 1.04791976  |
| H | 7.12681015   | -0.30585478  | 0.49928442  |
| H | 6.50294700   | 3.74065761   | -1.36562682 |
| H | 5.90516912   | 5.91313260   | -0.40137100 |
| H | 3.35140757   | 4.50364624   | 0.47026241  |
| H | 3.73799361   | 6.75410755   | -1.55689967 |
| H | 2.89415267   | 3.87516008   | -2.06865440 |
| H | 2.09025438   | 8.02026933   | -1.30198675 |
| H | -0.00690118  | 8.55886908   | -0.17090549 |
| H | -0.29877998  | 5.55543152   | 0.23159864  |
| H | -1.92910840  | 7.55319674   | -1.39578885 |

|   |              |             |             |
|---|--------------|-------------|-------------|
| H | -0.09644894  | 5.31409332  | -2.37822947 |
| H | -3.69073736  | 6.81875411  | -2.25514188 |
| H | -3.06975603  | 3.23838059  | -1.99607705 |
| H | -6.07188949  | 3.58816273  | -1.59202092 |
| H | -3.81332663  | 4.15001669  | 0.38315326  |
| H | -5.71436630  | 6.06670712  | -1.01895972 |
| H | -3.69216396  | 2.88393955  | -4.33455365 |
| H | -4.55675287  | 1.70652091  | -3.31676763 |
| H | -0.41542177  | 6.37603747  | -4.58093283 |
| H | -1.95577350  | 5.78827643  | -3.91773953 |
| H | 3.26511186   | 4.44959594  | -4.40750212 |
| H | 2.16088912   | 5.65662717  | -3.70460321 |
| H | 4.57546005   | 0.31429246  | -3.77295430 |
| H | 4.76477961   | 2.01382964  | -3.27970690 |
| H | 2.34835198   | -3.40367417 | -2.83897764 |
| H | 3.69824798   | -2.35710934 | -2.34794145 |
| H | -0.30770874  | -4.74027668 | -1.40822198 |
| H | -1.85738787  | -4.55993671 | -2.25894328 |
| H | -3.60183244  | -2.33623271 | -2.09024628 |
| H | -4.13012976  | -1.14831463 | -3.30176161 |
| H | -6.01797513  | 7.89287653  | 0.61202660  |
| H | -4.96930575  | 8.32712170  | -0.76778591 |
| H | 0.73697910   | 8.67263334  | 2.85204732  |
| H | 0.76911523   | 9.58207027  | 1.32576244  |
| H | 6.13112402   | 6.15027708  | 2.36357143  |
| H | 7.44980012   | 5.89810730  | 1.18061882  |
| H | 7.29622635   | 0.04885488  | 3.21376029  |
| H | 7.95779581   | -1.33666191 | 2.29450912  |
| H | 2.64780864   | -5.34088697 | 4.67447088  |
| H | 2.33131601   | -6.25942048 | 3.18959197  |
| H | -4.17265375  | -3.18177108 | 5.27205278  |
| H | -4.42215165  | -4.54287026 | 4.15882426  |
| H | -8.34920064  | 1.34030032  | 2.75541170  |
| H | -8.80626108  | 1.20101991  | 1.03756999  |
| H | -6.22969768  | -2.11564736 | 4.50952953  |
| H | 0.23538340   | -5.37504597 | 5.21448089  |
| H | 5.97901226   | -1.54194374 | 4.60118484  |
| H | 6.82399159   | 4.04628130  | 3.51518200  |
| H | 3.18552371   | 8.43079128  | 2.77992290  |
| H | -4.15481374  | 8.62202503  | 2.14082868  |
| H | -8.08002171  | 3.79758522  | 2.44017337  |
| H | -6.47624079  | -3.96010867 | 6.20554904  |
| H | -6.74509027  | -5.10917063 | 4.87511359  |
| H | -7.90243484  | -3.80345278 | 5.16153581  |
| H | -10.34348037 | 2.90483606  | 3.06108177  |
| H | -10.74592475 | 2.77727798  | 1.33300305  |
| H | -10.45655785 | 4.36413588  | 2.05556387  |
| H | -5.98307532  | 10.21449728 | 1.55649046  |
| H | -5.07810516  | 10.72424735 | 0.11189167  |
| H | -4.42941534  | 11.05983354 | 1.72130383  |
| H | 2.25141105   | 10.56503530 | 3.73174238  |
| H | 2.39091617   | 11.31164573 | 2.12449245  |
| H | 3.84701632   | 10.79899027 | 2.98736132  |
| H | 7.84087199   | 6.20441904  | 4.25516228  |
| H | 9.14978739   | 5.98811475  | 3.06974226  |
| H | 8.98889484   | 4.85854868  | 4.42018249  |
| H | 8.28747457   | -0.94367599 | 5.34837298  |
| H | 8.93638310   | -2.31536206 | 4.42080804  |

|   |             |             |             |
|---|-------------|-------------|-------------|
| H | 7.86957390  | -2.61003645 | 5.80014176  |
| H | 1.61515611  | -7.31447529 | 5.96221500  |
| H | 1.26572846  | -8.15958631 | 4.44760423  |
| H | -0.04544083 | -7.80424346 | 5.59005323  |
| H | -5.86951662 | 3.38294922  | 1.19189836  |
| H | -2.44620938 | 6.50052022  | 0.94755953  |
| H | -1.07893233 | 8.45408527  | -3.76509202 |
| H | 2.79953153  | 6.60670129  | 1.17765321  |
| H | 4.92798271  | 6.02229489  | -3.96978644 |
| H | 5.81059203  | 2.76428155  | 1.51656651  |
| H | 4.44515931  | -1.84443455 | 2.50592396  |
| H | 3.54841943  | -5.13465464 | -1.95533755 |
| H | -2.70740122 | -6.07796775 | -0.79165541 |
| H | -0.19500111 | -3.44453602 | 3.38063173  |
| H | -4.90408673 | -1.21206152 | 2.67381146  |
| H | -6.28017706 | -1.81441699 | -2.73127370 |
| H | -5.66443018 | 4.11736929  | -4.22543175 |
| H | 6.82243191  | 0.10706498  | -3.20359056 |
| H | -6.53607524 | -2.50188381 | 2.48199729  |
| H | -7.59884337 | 4.14644071  | 0.40503234  |
| H | -2.36576000 | 8.52324329  | 0.85804901  |
| H | 3.78917507  | 8.35480418  | 0.75032861  |
| H | 7.81969337  | 2.92013928  | 1.86983789  |
| H | 5.72774883  | -3.26969260 | 3.23015200  |
| H | -0.81013213 | -5.38202310 | 3.39713208  |

255

2-HP-B-CD:cis-(1R,4R)-SRT\_4\_CI E(Ha)= -7253.8893966519

|    |             |             |             |
|----|-------------|-------------|-------------|
| Cl | -0.21371266 | 1.29011605  | -2.76742427 |
| Cl | -0.25418336 | -1.82463696 | -3.33554780 |
| O  | -5.87153022 | 0.43420219  | -2.34545472 |
| O  | -4.21750172 | -2.48346911 | -0.85030274 |
| O  | -4.22500978 | -4.47703995 | -2.05079994 |
| O  | -0.78777580 | -5.27090483 | -1.07239542 |
| O  | 0.73345205  | -6.17874989 | -2.56197024 |
| O  | 3.20691064  | -4.14339115 | -0.82901962 |
| O  | 5.30546297  | -3.55679592 | -1.61749921 |
| O  | 4.78272388  | -0.01068396 | -0.82003371 |
| O  | 5.74484055  | 1.65042617  | -2.13144844 |
| O  | 2.86776730  | 3.85803811  | -1.67688878 |
| O  | 1.96704744  | 5.43285895  | -3.10144041 |
| O  | -1.28595808 | 4.75019166  | -1.54535415 |
| O  | -3.19824551 | 4.89441629  | -2.85045698 |
| O  | -2.51154560 | 5.88416611  | 0.55543970  |
| O  | -4.52651300 | 3.84932749  | 0.91996280  |
| O  | -4.53097962 | 1.92842375  | -1.18285827 |
| O  | 0.15699630  | 5.56504962  | 0.69127127  |
| O  | 2.95950649  | 5.89628563  | 0.36834807  |
| O  | -0.12111536 | 6.86444239  | -4.29036607 |
| O  | 3.70971032  | 3.48757172  | 1.03971945  |
| O  | 5.51161736  | 1.38369881  | 1.49331900  |
| O  | 5.74539703  | 4.03994981  | -3.65574167 |
| O  | 4.17554647  | -3.97027594 | 1.82779492  |
| O  | 4.62023368  | -1.21424201 | 1.74118390  |
| O  | 2.55083459  | -6.10150252 | 1.16732002  |
| O  | -0.08124474 | -7.15408660 | 0.84109495  |
| O  | 3.16260180  | -6.49927642 | -3.79316145 |
| O  | -3.04991187 | -6.64202845 | -3.44742413 |
| O  | -4.56633273 | -3.80771638 | 1.48630634  |
| O  | -2.17996161 | -5.38363256 | 1.43188755  |
| O  | -5.22494542 | -1.16438113 | 1.44186515  |
| O  | -5.99463451 | 1.53876463  | 1.11050720  |
| O  | -6.70602845 | -1.95691005 | -3.44053049 |
| O  | -5.52839268 | 3.99794022  | -4.05860424 |
| O  | 7.28611877  | -1.84636949 | -2.59153065 |
| O  | -6.92073574 | -2.98464102 | 2.86901023  |
| O  | -7.24220711 | 4.05573703  | 1.78504778  |
| O  | -1.08936704 | 7.36787567  | 2.60433368  |
| O  | 5.72919439  | 5.45253199  | 1.13936739  |
| O  | 7.13807340  | -0.74166184 | 2.77126012  |
| O  | 5.28354406  | -6.52928939 | 1.77623698  |
| O  | -2.80208216 | -8.09036626 | 1.25090915  |
| N  | 1.37873499  | 3.95050689  | 2.77571079  |
| C  | 0.93612180  | 2.85066726  | 3.74825157  |
| C  | 1.96007102  | 1.72403976  | 3.72510338  |
| C  | 1.83591852  | 0.90959065  | 2.44481248  |
| C  | 0.45645092  | 0.25631237  | 2.30467156  |
| C  | -1.99905216 | 0.74219131  | 2.55175531  |
| C  | -3.07680099 | 1.48831144  | 3.00609248  |
| C  | -2.85167771 | 2.68410827  | 3.68784068  |
| C  | -1.54925316 | 3.10648240  | 3.90977209  |
| C  | -0.45759128 | 2.36547197  | 3.43797174  |
| C  | -0.67875516 | 1.16246346  | 2.75205744  |
| C  | 0.25307889  | -0.26587743 | 0.89649510  |



|   |             |             |             |
|---|-------------|-------------|-------------|
| C | 0.10584759  | 0.62189975  | -0.17218636 |
| C | -0.04477680 | 0.15558089  | -1.47278761 |
| C | -0.06812708 | -1.21886592 | -1.72663992 |
| C | 0.05507360  | -2.10878192 | -0.66582834 |
| C | 0.22189805  | -1.63390524 | 0.63105049  |
| C | 1.76569180  | 5.22637264  | 3.43057272  |
| C | -4.99247340 | -0.69625231 | -2.29243676 |
| C | -5.18563311 | -1.45314841 | -0.97707347 |
| C | -5.03277725 | -0.51063594 | 0.21305396  |
| C | -6.05587150 | 0.60109679  | 0.05390669  |
| C | -5.79763899 | 1.32635863  | -1.27060740 |
| C | -4.65607016 | -3.82112460 | -0.89242045 |
| C | -2.80717481 | -4.57685408 | -2.19981755 |
| C | -2.20883593 | -5.31446924 | -1.00327740 |
| C | -2.62031321 | -4.65331832 | 0.30739660  |
| C | -4.13595117 | -4.53591573 | 0.35827953  |
| C | -0.07842978 | -6.43209614 | -1.45436216 |
| C | 0.76537687  | -6.87608649 | -0.25223313 |
| C | 1.71617780  | -5.74832228 | 0.09385488  |
| C | 2.54822990  | -5.36880698 | -1.12832781 |
| C | 1.71784484  | -5.15597978 | -2.39505928 |
| C | 4.58220774  | -4.15073962 | -0.56782541 |
| C | 4.99823303  | -2.18773594 | -1.88213886 |
| C | 5.20575260  | -1.35625987 | -0.61561617 |
| C | 4.40394766  | -1.93355564 | 0.54410256  |
| C | 4.83995352  | -3.37899478 | 0.73109676  |
| C | 5.75502919  | 1.00048777  | -0.88967173 |
| C | 5.46003452  | 2.01026879  | 0.23061185  |
| C | 4.08232137  | 2.60691488  | -0.01959374 |
| C | 4.14130495  | 3.31250468  | -1.37228060 |
| C | 4.52836617  | 2.31415949  | -2.46767567 |
| C | 2.75512650  | 5.23376114  | -1.97384185 |
| C | 2.10392196  | 5.93512817  | -0.76402028 |
| C | 0.79942639  | 5.19076802  | -0.51361104 |
| C | -0.07119983 | 5.44436706  | -1.74161056 |
| C | 0.62242336  | 4.94670048  | -3.01596200 |
| C | -2.49963493 | 5.43709002  | -1.77615026 |
| C | -3.57500025 | 3.51703090  | -2.71403431 |
| C | -4.39315846 | 3.31628885  | -1.44031044 |
| C | -3.70393270 | 3.91625898  | -0.21930409 |
| C | -3.31749612 | 5.35968655  | -0.48590823 |
| C | -4.37971840 | 3.19414213  | -3.96208300 |
| C | -0.07372078 | 5.45864923  | -4.26596604 |
| C | 4.78250099  | 3.02208542  | -3.78796651 |
| C | 5.94158339  | -1.76774273 | -2.99686249 |
| C | 2.58060576  | -5.23010043 | -3.64560848 |
| C | -2.57383976 | -5.31978928 | -3.50375748 |
| C | -5.36486985 | -1.54127147 | -3.49965622 |
| C | -3.18432599 | 6.66911950  | 1.54329523  |
| C | 3.96560717  | 6.92274293  | 0.36334896  |
| C | 6.76319379  | 1.56762759  | 2.16752250  |
| C | 5.00077545  | -4.41389928 | 2.90726022  |
| C | -0.44689059 | -8.52974994 | 0.94667170  |
| C | -5.11845761 | -4.56898981 | 2.55931995  |
| C | -7.17582691 | 1.64061217  | 1.90858929  |
| C | -5.83920342 | -3.62120477 | 3.50812519  |
| C | -1.66615782 | -8.67920286 | 1.84358235  |
| C | 4.98809401  | -5.93769436 | 3.02672329  |

|   |             |              |             |
|---|-------------|--------------|-------------|
| C | 6.92111804  | 0.54780589   | 3.28671154  |
| C | 5.01919379  | 6.63797754   | 1.42543524  |
| C | -2.32932538 | 6.71515456   | 2.79805113  |
| C | -7.16164825 | 2.96083145   | 2.66588482  |
| C | -6.39008248 | -4.38555903  | 4.69823171  |
| C | -8.34969924 | 3.03820300   | 3.60777271  |
| C | -3.04952145 | 7.45367595   | 3.91022699  |
| C | 6.02145003  | 7.77690759   | 1.47671273  |
| C | 8.11724584  | 0.90670556   | 4.15208228  |
| C | 6.01485516  | -6.39582813  | 4.04639273  |
| C | -1.96997157 | -10.14805439 | 2.07863898  |
| H | 2.97635903  | 2.12361475   | 3.82828468  |
| H | 2.61054644  | 0.13767350   | 2.40684454  |
| H | 2.01626990  | 1.55907693   | 1.57943175  |
| H | 0.43609862  | -0.61353491  | 2.97669746  |
| H | -2.18395300 | -0.19651874  | 2.03598886  |
| H | -4.08525311 | 1.12650559   | 2.82715262  |
| H | -3.68531628 | 3.27245893   | 4.05773918  |
| H | -1.36790628 | 4.01390028   | 4.48272257  |
| H | 0.08461869  | 1.69423398   | -0.00125404 |
| H | -0.00491681 | -3.17496778  | -0.85780159 |
| H | 0.32173359  | -2.34642725  | 1.44575290  |
| H | 2.16333115  | 5.88711931   | 2.66132242  |
| H | 2.51642258  | 5.02441890   | 4.19575470  |
| H | 0.87831330  | 5.68730930   | 3.86699948  |
| H | 0.64502874  | 4.20171571   | 2.09102736  |
| H | 2.18315437  | 3.60836193   | 2.21454435  |
| H | 0.93078837  | 3.34019628   | 4.72688177  |
| H | 1.77750685  | 1.09119089   | 4.60086288  |
| H | 5.74132356  | -2.39173347  | -3.87996773 |
| H | -2.29703807 | 6.48019723   | -2.04296475 |
| H | -4.21990254 | 5.97312041   | -0.60780586 |
| H | -2.77783665 | 3.34719317   | -0.04583477 |
| H | -4.82315195 | 2.92020597   | 1.00689027  |
| H | -5.37680489 | 3.78594939   | -1.57780982 |
| H | -2.67820081 | 2.88595937   | -2.66572157 |
| H | -4.71720686 | 2.15509820   | -3.90864838 |
| H | 3.74020336  | 5.64856410   | -2.21557904 |
| H | 1.89794971  | 6.98426760   | -1.01571650 |
| H | 1.02154358  | 4.11653331   | -0.47344400 |
| H | -0.81564377 | 5.47356455   | 0.54837485  |
| H | -0.25878594 | 6.52254797   | -1.84215869 |
| H | 0.62654109  | 3.85074092   | -3.00156712 |
| H | 0.43914104  | 5.04832150   | -5.14720655 |
| H | -1.10734715 | 5.10092533   | -4.27383684 |
| H | 0.78861121  | 7.17250624   | -4.36744496 |
| H | 6.76007743  | 0.57679102   | -0.78746682 |
| H | 6.20651077  | 2.81578071   | 0.18502118  |
| H | 3.34690486  | 1.79496678   | -0.07277119 |
| H | 3.42412936  | 4.34390002   | 0.64077534  |
| H | 4.89813879  | 4.10824258   | -1.33624664 |
| H | 3.71493322  | 1.58402403   | -2.58409358 |
| H | 5.07365723  | 2.27380466   | -4.53822898 |
| H | 3.85614275  | 3.49745236   | -4.12304786 |
| H | 6.57576850  | 3.61093166   | -3.41957398 |
| H | 4.96734144  | -5.17048381  | -0.47235110 |
| H | 5.92352402  | -3.40058843  | 0.90434362  |
| H | 3.33451569  | -1.91320657  | 0.28986269  |

|   |             |             |             |
|---|-------------|-------------|-------------|
| H | 4.73286879  | -0.27173918 | 1.50725419  |
| H | 6.27393911  | -1.37354437 | -0.36005773 |
| H | 3.95402913  | -2.08705486 | -2.21164219 |
| H | 5.74783946  | -0.72452336 | -3.26226869 |
| H | -0.77999532 | -7.21258183 | -1.76808787 |
| H | 1.34281978  | -7.77002075 | -0.52643803 |
| H | 1.10837050  | -4.87501171 | 0.37017934  |
| H | 2.98781940  | -5.27306141 | 1.45047666  |
| H | 3.28064833  | -6.16406699 | -1.32442361 |
| H | 1.23381978  | -4.17331195 | -2.34050805 |
| H | 1.96785278  | -4.95449239 | -4.51688744 |
| H | 3.39761350  | -4.50768720 | -3.55724837 |
| H | 2.43248114  | -7.12742795 | -3.84057898 |
| H | -5.75021212 | -3.86003924 | -0.91892490 |
| H | -4.57120612 | -5.54495410 | 0.37339226  |
| H | -2.20244699 | -3.63537686 | 0.33373681  |
| H | -1.29590784 | -5.75014287 | 1.23536045  |
| H | -2.55473474 | -6.35640481 | -1.00715318 |
| H | -2.36667013 | -3.57251799 | -2.26299858 |
| H | -1.49864801 | -5.37377824 | -3.69806663 |
| H | -3.04087740 | -4.74931070 | -4.32017232 |
| H | -3.99805933 | -6.59108896 | -3.28025374 |
| H | -6.56978232 | 2.08201602  | -1.45401545 |
| H | -7.05851609 | 0.15604808  | 0.01444830  |
| H | -4.02594602 | -0.06601889 | 0.17704121  |
| H | -4.74918409 | -2.01975955 | 1.39939758  |
| H | -6.19625783 | -1.88394056 | -0.97470384 |
| H | -3.94682880 | -0.36546738 | -2.36745784 |
| H | -4.74920857 | -2.44457771 | -3.51077884 |
| H | -5.15254934 | -0.96518770 | -4.41267709 |
| H | -7.24036968 | -1.15447779 | -3.43002148 |
| H | -5.22402420 | 4.91006718  | -4.12392812 |
| H | 7.45106521  | -2.76990095 | -2.36792949 |
| H | -4.31781684 | -5.11493606 | 3.07335059  |
| H | -5.84669195 | -5.28956117 | 2.16152403  |
| H | 0.40679701  | -9.09413404 | 1.34750134  |
| H | -0.70247489 | -8.93352025 | -0.04340286 |
| H | 4.62617605  | -3.95134837 | 3.82800542  |
| H | 6.02946079  | -4.06778395 | 2.75074596  |
| H | 6.80177833  | 2.59544932  | 2.55575863  |
| H | 7.59521094  | 1.42668744  | 1.46454278  |
| H | 3.47505463  | 7.88710580  | 0.54846520  |
| H | 4.46118456  | 6.96000397  | -0.61459391 |
| H | -4.14787391 | 6.20638835  | 1.77942375  |
| H | -3.34851212 | 7.68497502  | 1.15658487  |
| H | -7.22481315 | 0.78552671  | 2.59526685  |
| H | -8.06235340 | 1.63009149  | 1.26013457  |
| H | -5.10526088 | -2.87742057 | 3.86376384  |
| H | -6.23006048 | 3.00376408  | 3.25874205  |
| H | -2.16960842 | 5.66554766  | 3.09704784  |
| H | 4.51492862  | 6.56173987  | 2.40355611  |
| H | 6.00574982  | 0.57847611  | 3.90351400  |
| H | 3.98602370  | -6.25015093 | 3.35725232  |
| H | -1.43664838 | -8.19708237 | 2.80831616  |
| H | 8.00002779  | 1.88764796  | 4.62173958  |
| H | 9.03209012  | 0.91118898  | 3.55108718  |
| H | 8.23664705  | 0.15433650  | 4.93438825  |
| H | 5.85360248  | -5.92209983 | 5.02006670  |

|   |             |              |             |
|---|-------------|--------------|-------------|
| H | 7.02344393  | -6.14793203  | 3.70089690  |
| H | 5.95831283  | -7.47904079  | 4.17351568  |
| H | -1.13396093 | -10.66092463 | 2.56288564  |
| H | -2.18702701 | -10.64754510 | 1.12896845  |
| H | -2.85298715 | -10.24060458 | 2.71452179  |
| H | -5.59577116 | -4.89380997  | 5.25256137  |
| H | -7.11830067 | -5.13108402  | 4.36379966  |
| H | -6.90252837 | -3.69562476  | 5.37222061  |
| H | -8.33438624 | 2.22818332   | 4.34238622  |
| H | -9.28458800 | 2.98217293   | 3.04154595  |
| H | -8.33630101 | 3.99358230   | 4.13672031  |
| H | -3.98678040 | 6.95760663   | 4.17719032  |
| H | -3.26824951 | 8.48151807   | 3.60573002  |
| H | -2.41283046 | 7.49769609   | 4.79719854  |
| H | 5.53980141  | 8.72775893   | 1.72075326  |
| H | 6.53207783  | 7.87630814   | 0.51401386  |
| H | 6.77612637  | 7.56267250   | 2.23597458  |
| H | -6.56291541 | -2.30270700  | 2.28279004  |
| H | -6.38825363 | 4.15452660   | 1.34021238  |
| H | -0.64040012 | 6.99213588   | 1.83618442  |
| H | 5.17432487  | 4.69341063   | 1.37106980  |
| H | 6.28425931  | -1.09286709  | 2.46668147  |
| H | 4.43415039  | -6.73686273  | 1.36171125  |
| H | -2.74349223 | -7.13146055  | 1.39550289  |
| H | -3.72818446 | 3.29988430   | -4.84224002 |

2-HP-B-CD:cis-(1R,4R)-SRT\_5\_CI E(Ha)= -7253.8898260358

|    |             |             |             |
|----|-------------|-------------|-------------|
| Cl | 0.85338891  | -1.34147121 | 3.37961581  |
| Cl | -0.59273827 | 1.35221732  | 2.49414144  |
| O  | 2.42095179  | 5.44958732  | 2.36832974  |
| O  | 4.03730090  | 2.43452452  | 1.02795006  |
| O  | 5.45148202  | 1.25637595  | 2.44406749  |
| O  | 4.83849918  | -1.99997402 | 0.89368830  |
| O  | 5.20238782  | -3.94369113 | 2.11079018  |
| O  | 1.88890751  | -5.02580460 | 0.98839296  |
| O  | 0.41387545  | -6.05031329 | 2.44714692  |
| O  | -2.32714703 | -4.24450570 | 0.83122180  |
| O  | -4.42560936 | -4.12102446 | 1.82169883  |
| O  | -4.63716143 | -0.50117624 | 1.36435567  |
| O  | -5.59791487 | 1.07310287  | 2.74929666  |
| O  | -3.45413931 | 3.65296326  | 1.26064526  |
| O  | -2.80310489 | 5.45801885  | 2.56766111  |
| O  | -3.79152059 | 5.23540933  | -0.89689748 |
| O  | -1.01252626 | 5.98479427  | -1.12467344 |
| O  | 0.51811154  | 5.07800589  | 1.10244320  |
| O  | -4.74004656 | 2.72211115  | -1.01578144 |
| O  | -6.34806701 | 0.40285726  | -0.75346533 |
| O  | -5.89090021 | 3.56115920  | 3.95855000  |
| O  | -4.53008154 | -1.40947854 | -1.34254101 |
| O  | -3.51635223 | -4.02377082 | -1.71673805 |
| O  | -6.55207341 | -2.78115069 | 3.14395859  |
| O  | 1.24891691  | -6.83338503 | -1.00357384 |
| O  | -1.44667894 | -5.91472606 | -1.26039153 |
| O  | 3.38794522  | -5.05804698 | -1.44782060 |
| O  | 5.62264100  | -3.33107426 | -1.44884056 |
| O  | 4.31255868  | -6.31827558 | 3.36745327  |
| O  | 6.54238584  | -0.77787858 | 3.90530719  |
| O  | 5.77897725  | 2.28936171  | -1.00610446 |
| O  | 6.04590753  | -0.56412807 | -1.21521016 |
| O  | 3.65648494  | 3.97179712  | -1.31827839 |
| O  | 1.75454312  | 6.06778675  | -1.14956032 |
| O  | 4.82416719  | 4.75604772  | 3.62602909  |
| O  | -0.97536477 | 7.15298242  | 3.80088585  |
| O  | -1.94060371 | -6.50105028 | 3.77024535  |
| O  | 6.23974895  | 4.79018283  | -2.26315581 |
| O  | 0.22444936  | 8.45734594  | -1.77281468 |
| O  | -5.48320856 | 4.56206259  | -3.14879636 |
| O  | -7.21905738 | -2.22986904 | -1.62295994 |
| O  | -4.07354327 | -6.77592767 | -1.73185355 |
| O  | 3.99382088  | -7.75956013 | -1.34559111 |
| O  | 8.23569117  | -2.31826772 | -1.16434368 |
| N  | -3.80050020 | 0.92865900  | -3.07560713 |
| C  | 2.86477265  | 4.08653302  | 2.36930256  |
| C  | 3.68781133  | 3.80797364  | 1.11015266  |
| C  | 2.90431805  | 4.17322096  | -0.14573888 |
| C  | 2.51271740  | 5.63795479  | -0.03471026 |
| C  | 1.68951018  | 5.83929044  | 1.24108004  |
| C  | 5.37286755  | 2.09216680  | 1.32734635  |
| C  | 4.87371116  | -0.04665088 | 2.31840553  |
| C  | 5.51104137  | -0.77434748 | 1.13722990  |
| C  | 5.39452220  | 0.05819603  | -0.13344782 |
| C  | 5.99751259  | 1.43273529  | 0.09225628  |
| C  | 5.54917362  | -3.21011229 | 0.96530411  |

|   |             |             |             |
|---|-------------|-------------|-------------|
| C | 5.21303540  | -4.02198770 | -0.28979304 |
| C | 3.71824434  | -4.28450134 | -0.31689830 |
| C | 3.31371778  | -4.98201904 | 0.97865124  |
| C | 3.81156899  | -4.24057512 | 2.22170772  |
| C | 1.22976872  | -6.22395883 | 1.32408574  |
| C | -0.62670588 | -5.07764778 | 2.32317009  |
| C | -1.47609779 | -5.35890201 | 1.08458870  |
| C | -0.62949734 | -5.57282657 | -0.16556480 |
| C | 0.39865057  | -6.65346106 | 0.10596558  |
| C | -3.69684679 | -4.48157519 | 0.67440502  |
| C | -4.19771336 | -3.67136955 | -0.52860712 |
| C | -4.04236610 | -2.18345007 | -0.24003310 |
| C | -4.81429420 | -1.87219246 | 1.03780671  |
| C | -4.32379640 | -2.74917603 | 2.18931505  |
| C | -5.78268613 | 0.28264351  | 1.61996360  |
| C | -6.03455268 | 1.18178560  | 0.39179904  |
| C | -4.75464821 | 1.98167807  | 0.19160361  |
| C | -4.62146712 | 2.87405485  | 1.42385674  |
| C | -4.52434804 | 2.01931830  | 2.69270295  |
| C | -3.53419838 | 5.05086952  | 1.45544847  |
| C | -1.40677601 | 5.13705734  | 2.53405932  |
| C | -0.75195095 | 5.68505241  | 1.26673113  |
| C | -1.54376155 | 5.34248979  | 0.00955548  |
| C | -3.00515977 | 5.71204789  | 0.18117982  |
| C | -0.81653379 | 5.75693337  | 3.78971935  |
| C | -4.66916864 | 2.86427170  | 3.94783376  |
| C | -5.18826988 | -2.57116777 | 3.42595918  |
| C | -1.43154521 | -5.20298821 | 3.60743825  |
| C | 3.66126962  | -5.07747955 | 3.48107895  |
| C | 5.16374546  | -0.73099986 | 3.64466962  |
| C | 3.68563951  | 3.92980664  | 3.63777395  |
| C | -4.08154913 | 6.16862822  | -1.94026649 |
| C | -7.72557833 | -0.00261489 | -0.81087463 |
| C | -4.31439453 | -4.60212801 | -2.75275196 |
| C | 1.62365795  | -8.19402530 | -1.22587056 |
| C | 6.71740109  | -3.89468797 | -2.17192436 |
| C | 6.89225494  | 2.49211218  | -1.87394384 |
| C | 2.28821281  | 7.19999570  | -1.84105765 |
| C | 6.52633273  | 3.56320661  | -2.89200698 |
| C | 7.80802939  | -2.85418067 | -2.39912222 |
| C | 2.89117009  | -8.26147770 | -2.06467612 |
| C | -3.99418807 | -6.08208060 | -2.96001556 |
| C | -7.92739221 | -1.04251949 | -1.90447975 |
| C | -4.34291258 | 5.39963999  | -3.22290331 |
| C | 1.18438044  | 7.88814601  | -2.63101692 |
| C | 7.67843225  | 3.79212202  | -3.85314924 |
| C | 1.76491144  | 9.00478806  | -3.48035673 |
| C | -4.56293883 | 6.34719048  | -4.38641049 |
| C | -9.39888600 | -1.39824900 | -2.01513077 |
| C | -4.97114421 | -6.69838811 | -3.94539549 |
| C | 3.19294914  | -9.70106492 | -2.44348153 |
| C | 8.99974241  | -3.48172866 | -3.09969755 |
| C | -5.09470190 | 1.15239816  | -3.77077639 |
| C | 0.72938865  | -1.63965866 | -0.60192626 |
| C | 0.95280125  | -1.90171289 | 0.74232365  |
| C | 0.54969324  | -0.99070773 | 1.71359593  |
| C | -0.08788294 | 0.18709820  | 1.31954869  |
| C | -0.32565635 | 0.43608692  | -0.03021762 |

|   |             |             |             |
|---|-------------|-------------|-------------|
| C | 0.08201309  | -0.47169362 | -1.00844821 |
| C | -0.35613744 | 1.17374104  | -2.89593052 |
| C | -1.45134939 | 1.68180499  | -3.60957224 |
| C | -1.44073091 | 3.01368821  | -4.04325905 |
| C | -0.37553951 | 3.85345542  | -3.75327014 |
| C | 0.71797794  | 3.35437077  | -3.04562252 |
| C | 0.72091675  | 2.02908714  | -2.63239859 |
| C | -0.25898856 | -0.27940603 | -2.47510817 |
| C | -1.52889268 | -1.08794023 | -2.78773919 |
| C | -2.19335057 | -0.66603423 | -4.09097718 |
| C | -2.60198450 | 0.79870257  | -4.01951697 |
| H | 2.00055668  | 3.40821759  | 2.39478009  |
| H | 4.59669568  | 4.42337347  | 1.15194817  |
| H | 1.98855779  | 3.56371166  | -0.17870548 |
| H | 3.42819498  | 6.23827265  | 0.04291232  |
| H | 1.44854861  | 6.89881674  | 1.38510316  |
| H | 5.93447660  | 2.99194226  | 1.59976989  |
| H | 3.78892625  | 0.03232561  | 2.15845392  |
| H | 6.56754580  | -0.95771834 | 1.37652216  |
| H | 4.32372239  | 0.18703638  | -0.35815070 |
| H | 7.07571188  | 1.32363545  | 0.27565540  |
| H | 6.62821884  | -3.03178353 | 1.02059087  |
| H | 5.74063709  | -4.98197887 | -0.21761477 |
| H | 3.21091585  | -3.31069869 | -0.36917096 |
| H | 3.72232834  | -6.00130357 | 0.97784842  |
| H | 3.24122841  | -3.30753553 | 2.33318125  |
| H | 1.95970159  | -6.99332714 | 1.59882614  |
| H | -0.19889552 | -4.06946528 | 2.24586432  |
| H | -2.07654120 | -6.25756963 | 1.28155159  |
| H | -0.09460561 | -4.63664440 | -0.37940953 |
| H | -0.12239901 | -7.59174631 | 0.34215471  |
| H | -3.90512312 | -5.54198425 | 0.50499815  |
| H | -5.26662580 | -3.89660598 | -0.63459044 |
| H | -2.97950128 | -1.95409174 | -0.09194706 |
| H | -5.87820723 | -2.09024811 | 0.87116455  |
| H | -3.28133894 | -2.48792729 | 2.42191711  |
| H | -6.63776773 | -0.36490796 | 1.84441061  |
| H | -6.87352811 | 1.86035371  | 0.59815701  |
| H | -3.90775552 | 1.28227128  | 0.18555568  |
| H | -5.50320672 | 3.52434564  | 1.50882877  |
| H | -3.56005002 | 1.49463483  | 2.69304163  |
| H | -4.57114037 | 5.34845186  | 1.64599391  |
| H | -1.27561273 | 4.04827332  | 2.54931791  |
| H | -0.65660973 | 6.77577969  | 1.35964248  |
| H | -1.49395161 | 4.25164850  | -0.12429521 |
| H | -3.11682840 | 6.79981094  | 0.27842477  |
| H | -1.27619375 | 5.28348599  | 4.66999690  |
| H | 0.25823047  | 5.55362707  | 3.81458134  |
| H | -4.55823864 | 2.21230902  | 4.82567749  |
| H | -3.87226318 | 3.61276488  | 3.97297302  |
| H | -4.82280747 | -3.24780787 | 4.21089876  |
| H | -5.09019730 | -1.54374314 | 3.78836372  |
| H | -0.79597145 | -4.89972246 | 4.45259474  |
| H | -2.28793940 | -4.52468899 | 3.56213454  |
| H | 4.03634831  | -4.49313705 | 4.33412983  |
| H | 2.60024707  | -5.28425452 | 3.65126831  |
| H | 4.80980424  | -1.76443495 | 3.60167379  |
| H | 4.61060025  | -0.20871674 | 4.44005042  |

|   |              |              |             |
|---|--------------|--------------|-------------|
| H | 4.03905961   | 2.89791420   | 3.71265129  |
| H | 3.03787024   | 4.13653821   | 4.50249369  |
| H | -3.22121414  | 6.82860540   | -2.08861490 |
| H | -4.96134334  | 6.76691190   | -1.66413819 |
| H | -8.33997016  | 0.88686572   | -1.00246981 |
| H | -8.03030687  | -0.44242107  | 0.14684607  |
| H | -4.11891709  | -4.04180227  | -3.67603860 |
| H | -5.37769589  | -4.48837617  | -2.50716427 |
| H | 0.79259116   | -8.71339803  | -1.72329076 |
| H | 1.82845675   | -8.69179820  | -0.26769463 |
| H | 6.34262107   | -4.28653496  | -3.12597105 |
| H | 7.14786808   | -4.72753298  | -1.60262450 |
| H | 7.14944933   | 1.54814308   | -2.36955234 |
| H | 7.75448477   | 2.83955837   | -1.28672653 |
| H | 3.10413283   | 6.86944692   | -2.49738741 |
| H | 2.68500518   | 7.92479829   | -1.11763614 |
| H | 5.64967162   | 3.20245161   | -3.45750846 |
| H | 7.39568741   | -2.05389726  | -3.03407056 |
| H | 2.72243233   | -7.67297891  | -2.98172893 |
| H | -2.97393830  | -6.15960957  | -3.36495748 |
| H | -7.59228203  | -0.60954319  | -2.86220617 |
| H | -3.43679964  | 4.79811976   | -3.40283253 |
| H | 0.71975780   | 7.13657526   | -3.29433289 |
| H | 7.94332542   | 2.87613260   | -4.38921147 |
| H | 8.55864664   | 4.14881265   | -3.30917938 |
| H | 7.40192638   | 4.55724927   | -4.58183742 |
| H | 2.50418715   | 8.62733175   | -4.19242119 |
| H | 2.24226577   | 9.75510066   | -2.84237782 |
| H | 0.96317585   | 9.49856156   | -4.03363017 |
| H | -3.68124983  | 6.96858517   | -4.56594075 |
| H | -5.42082987  | 6.99775596   | -4.19218480 |
| H | -4.77690409  | 5.77655314   | -5.29356355 |
| H | -10.00751811 | -0.52391602  | -2.26166738 |
| H | -9.75788792  | -1.82475270  | -1.07356097 |
| H | -9.53351578  | -2.14890233  | -2.79638917 |
| H | -4.97555825  | -6.16110214  | -4.89938629 |
| H | -5.98382118  | -6.68238632  | -3.53033863 |
| H | -4.70156994  | -7.73929972  | -4.13592073 |
| H | 2.38098667   | -10.14573225 | -3.02631271 |
| H | 3.35210766   | -10.30444724 | -1.54398472 |
| H | 4.10980690   | -9.73682363  | -3.03561195 |
| H | 8.71310303   | -3.93920405  | -4.05170775 |
| H | 9.44814990   | -4.25119572  | -2.46324809 |
| H | 9.75972800   | -2.72152685  | -3.29296809 |
| H | -0.05808965  | 5.76677396   | -1.15809074 |
| H | -4.21863570  | 3.54317554   | -0.85321744 |
| H | -6.58781933  | 2.89753513   | 4.00938049  |
| H | -5.15489654  | -0.74009510  | -0.97881414 |
| H | -6.64226279  | -3.70179966  | 2.87171313  |
| H | -2.00450537  | -5.13352987  | -1.43672230 |
| H | 2.50198641   | -5.44216817  | -1.30014353 |
| H | 5.24856658   | -6.12961570  | 3.23372256  |
| H | 6.84914624   | 0.13634028   | 3.91135130  |
| H | 5.65581533   | -1.45469087  | -1.32687448 |
| H | 4.20450964   | 3.17067116   | -1.18665506 |
| H | 4.50629060   | 5.66459301   | 3.57299627  |
| H | -1.92361874  | 7.32493020   | 3.80770237  |
| H | -1.17749187  | -7.09016566  | 3.79370646  |



|   |             |             |             |
|---|-------------|-------------|-------------|
| H | 5.36557838  | 4.71439732  | -1.85329874 |
| H | -0.33258072 | 7.74595933  | -1.42465326 |
| H | -5.47237745 | 4.06523584  | -2.32072126 |
| H | -6.27610803 | -2.07696355 | -1.78445113 |
| H | -3.16724596 | -6.84243567 | -1.39608049 |
| H | 3.98422328  | -6.79172408 | -1.43208813 |
| H | 7.68186267  | -1.53957648 | -1.00287229 |
| H | -5.09670122 | 2.15627536  | -4.19922498 |
| H | -5.22355284 | 0.39288868  | -4.54319289 |
| H | -5.88633365 | 1.08551926  | -3.02573688 |
| H | 1.06391878  | -2.36268554 | -1.34245246 |
| H | 1.42528471  | -2.82927055 | 1.04400777  |
| H | -0.81684557 | 1.36335184  | -0.30771266 |
| H | -2.27083505 | 3.38263186  | -4.64213975 |
| H | -0.38650219 | 4.88330138  | -4.09554531 |
| H | 1.57311830  | 3.98404540  | -2.81641029 |
| H | 1.58440079  | 1.64384429  | -2.09568490 |
| H | 0.56582163  | -0.71365540 | -3.05876153 |
| H | -2.23633951 | -0.97097927 | -1.95992060 |
| H | -1.29450515 | -2.15601269 | -2.80661067 |
| H | -3.06412604 | -1.29921469 | -4.30129197 |
| H | -1.50504328 | -0.77980257 | -4.93565895 |
| H | -2.98036550 | 1.14198257  | -4.98707018 |
| H | -3.87423456 | 0.06930685  | -2.50081854 |
| H | -3.70754443 | 1.70574229  | -2.39866013 |

2-HP-B-CD:cis-(1R,4R)-SRT\_6\_Cl E(Ha)= -7253.8644732849

|    |             |             |             |
|----|-------------|-------------|-------------|
| Cl | -2.17048388 | -5.45835222 | 3.72568952  |
| Cl | -3.46431868 | -2.54885202 | 3.93514441  |
| O  | 2.04426628  | 5.21321203  | -2.84209947 |
| O  | -1.16647155 | 5.16938055  | -1.08635496 |
| O  | -3.12112186 | 5.87740034  | -2.14251984 |
| O  | -4.31023542 | 2.63867732  | -1.01057467 |
| O  | -6.04722415 | 1.31685346  | -1.79490857 |
| O  | -3.97185785 | -1.70743246 | -1.83961969 |
| O  | -3.86595961 | -3.40800950 | -3.38311767 |
| O  | -0.71687394 | -4.64190777 | -1.98078433 |
| O  | 0.98134204  | -5.41602571 | -3.34078243 |
| O  | 3.34510421  | -3.83920282 | -1.04897586 |
| O  | 5.53316955  | -3.38376502 | -1.67453519 |
| O  | 4.98934896  | 0.07411964  | -0.59340833 |
| O  | 5.84763861  | 1.79294647  | -1.88479274 |
| O  | 5.77455161  | 1.31554683  | 1.71717697  |
| O  | 4.19459595  | 3.66622255  | 1.41950699  |
| O  | 2.97737598  | 3.94744974  | -1.14701081 |
| O  | 4.79131618  | -1.32663488 | 1.85793082  |
| O  | 4.14223400  | -4.06795477 | 1.62101543  |
| O  | 7.65902364  | -1.65769548 | -2.34604292 |
| O  | 2.25001006  | -5.87121223 | 0.58983670  |
| O  | -0.32908625 | -6.77164207 | -0.23224278 |
| O  | 3.51773065  | -5.62048545 | -4.33369261 |
| O  | -4.80773105 | -3.51507505 | 0.13379343  |
| O  | -2.56205375 | -5.14375789 | 0.14368852  |
| O  | -4.00592659 | -1.03814285 | 0.96163657  |
| O  | -4.69037340 | 1.57723364  | 1.57711988  |
| O  | -7.17352533 | -0.99163833 | -3.09086426 |
| O  | -5.72044562 | 5.55677416  | -3.05959683 |
| O  | -2.21396922 | 6.15568572  | 1.36378886  |
| O  | -4.39329177 | 4.29519995  | 1.43752385  |
| O  | 0.45199603  | 6.72883321  | 0.65902269  |
| O  | 3.24548478  | 6.18877364  | 0.44893608  |
| O  | 0.06885872  | 6.33376055  | -4.37220740 |
| O  | 5.58696213  | 4.16151245  | -3.46281345 |
| O  | -2.61413629 | -5.37992809 | -4.95574809 |
| O  | -1.48711110 | 8.78627537  | 0.81594010  |
| O  | 6.03752423  | 5.69395231  | 1.02639216  |
| O  | 7.40066946  | -0.87153158 | 2.73496890  |
| O  | 4.83219833  | -6.76445044 | 1.33420683  |
| O  | -3.03890189 | -7.79927492 | -0.47584948 |
| O  | -6.61207814 | -1.87444789 | 1.59790941  |
| O  | -6.89889336 | 3.06775371  | 2.28667916  |
| N  | -1.22054714 | 1.95908190  | -0.79443143 |
| C  | -1.43673423 | 1.49647661  | -2.19012228 |
| C  | 0.72453433  | -3.07066034 | 2.37051088  |
| C  | -0.00041866 | -4.18938645 | 2.75039185  |
| C  | -1.30539989 | -4.05330607 | 3.22532606  |
| C  | -1.87200815 | -2.77938456 | 3.30055560  |
| C  | -1.15060976 | -1.66130585 | 2.87663277  |
| C  | 0.15621488  | -1.79134495 | 2.41467609  |
| C  | 0.46045306  | 0.74508461  | 2.31160651  |
| C  | -0.00960336 | 1.68079022  | 1.37208857  |
| C  | -0.43045279 | 2.94266969  | 1.81196181  |
| C  | -0.43173125 | 3.27445532  | 3.15947068  |

|   |             |             |             |
|---|-------------|-------------|-------------|
| C | 0.01782771  | 2.34555483  | 4.09353812  |
| C | 0.46402742  | 1.10371586  | 3.66440003  |
| C | 0.99857083  | -0.61863901 | 1.92519995  |
| C | 1.22329509  | -0.71043997 | 0.41072984  |
| C | 0.03558928  | -0.15305906 | -0.35328633 |
| C | -0.01188045 | 1.34510322  | -0.10736608 |
| C | 0.70008378  | 4.83361013  | -2.58855290 |
| C | 0.09949175  | 5.70840855  | -1.49115586 |
| C | 0.98613574  | 5.80600864  | -0.25468286 |
| C | 2.38817496  | 6.21511464  | -0.66571364 |
| C | 2.89688936  | 5.23056359  | -1.72735651 |
| C | -2.26845054 | 6.07272964  | -1.05488906 |
| C | -3.66542125 | 4.56975807  | -2.26297835 |
| C | -4.29893185 | 4.06748877  | -0.96095355 |
| C | -3.57035667 | 4.47376332  | 0.31826524  |
| C | -3.04154904 | 5.89050459  | 0.25019311  |
| C | -5.51006803 | 1.96349546  | -0.67677850 |
| C | -5.23305935 | 0.94892932  | 0.43148429  |
| C | -4.29039428 | -0.13609713 | -0.07385183 |
| C | -4.90638705 | -0.78125140 | -1.30635997 |
| C | -5.23965816 | 0.28236979  | -2.35674609 |
| C | -4.48214610 | -2.98178195 | -2.21009780 |
| C | -2.45333958 | -3.61788577 | -3.30114026 |
| C | -2.12038747 | -4.60820399 | -2.18530550 |
| C | -2.75292333 | -4.18711412 | -0.86462638 |
| C | -4.24328216 | -3.98311325 | -1.07114367 |
| C | 0.01286259  | -5.77323526 | -2.39527904 |
| C | 0.66866822  | -6.39411830 | -1.15298555 |
| C | 1.59883107  | -5.36154957 | -0.54930079 |
| C | 2.61539559  | -4.92713585 | -1.59978820 |
| C | 1.95341674  | -4.46735377 | -2.89878655 |
| C | 4.70359112  | -4.01113047 | -0.73349807 |
| C | 4.93661572  | -3.40750493 | 0.65513345  |
| C | 4.60192898  | -1.92834497 | 0.59618707  |
| C | 5.45119546  | -1.26785233 | -0.48061482 |
| C | 5.31483688  | -1.98192466 | -1.82559845 |
| C | 5.94247959  | 1.10478927  | -0.66616867 |
| C | 4.58225363  | 2.40611652  | -2.11688610 |
| C | 4.28377876  | 3.39559927  | -0.99230030 |
| C | 4.34773326  | 2.72963952  | 0.37735723  |
| C | 5.70312911  | 2.05005504  | 0.51577921  |
| C | 4.68484305  | 3.08259311  | -3.47365557 |
| C | 6.34935254  | -1.51072729 | -2.83432328 |
| C | 2.95232044  | -4.37029652 | -4.04217668 |
| C | -2.03421587 | -4.13347348 | -4.66781107 |
| C | -6.03055532 | -0.29430417 | -3.51933565 |
| C | -4.69851849 | 4.65235144  | -3.37885222 |
| C | -0.01712260 | 5.01150576  | -3.92097594 |
| C | 6.99919537  | 1.48883258  | 2.43451695  |
| C | 4.83889882  | -4.75375769 | 2.66569924  |
| C | -0.66336725 | -8.16046927 | -0.27795352 |
| C | -6.16455250 | -3.89853172 | 0.35286462  |
| C | -5.35653362 | 1.29163149  | 2.81660156  |
| C | -2.63536334 | 7.21122947  | 2.23368683  |
| C | 4.25260081  | 7.20168834  | 0.42045378  |
| C | -1.67754206 | 8.39832073  | 2.16502898  |
| C | -6.10399868 | 2.52295612  | 3.32797914  |
| C | -6.64930313 | -3.28893592 | 1.65896433  |

|   |             |             |             |
|---|-------------|-------------|-------------|
| C | -2.04053846 | -8.39009641 | 0.32569871  |
| C | 4.55428290  | -6.25299198 | 2.62390650  |
| C | 7.19372836  | 0.34442749  | 3.41742846  |
| C | 5.35606274  | 6.86694331  | 1.41207464  |
| C | -2.23145328 | 9.57268536  | 2.95107318  |
| C | 6.36598823  | 7.99866983  | 1.47639905  |
| C | 8.40830519  | 0.60475886  | 4.29128962  |
| C | 5.41174821  | -6.98129513 | 3.64334786  |
| C | -2.33063760 | -9.87768202 | 0.42009624  |
| C | -8.07932247 | -3.70474131 | 1.94482480  |
| C | -6.99650022 | 2.15207528  | 4.49787465  |
| H | -1.70613581 | 0.44162195  | -2.18531570 |
| H | -0.52190617 | 1.65374363  | -2.76272780 |
| H | -2.25837419 | 2.06920833  | -2.61373293 |
| H | 1.75650591  | -3.19452682 | 2.04800710  |
| H | 0.43991054  | -5.17850794 | 2.67485725  |
| H | -1.63045217 | -0.69017875 | 2.93037316  |
| H | -0.75834971 | 3.70239592  | 1.10780066  |
| H | -0.77823134 | 4.25563321  | 3.46741706  |
| H | 0.03215516  | 2.59197536  | 5.15070991  |
| H | 0.82639776  | 0.38002143  | 4.38990658  |
| H | 1.98308679  | -0.72504020 | 2.40166312  |
| H | 2.12502648  | -0.14892070 | 0.13332247  |
| H | 1.39550864  | -1.74930440 | 0.11846190  |
| H | 0.15135514  | -0.37212767 | -1.41814713 |
| H | -0.89364191 | -0.62614911 | -0.00441658 |
| H | 0.84535918  | 1.82353174  | -0.60321314 |
| H | -1.13396657 | 2.98765134  | -0.80409658 |
| H | -2.07162507 | 1.76527732  | -0.24950136 |
| H | 0.66803710  | 3.77592218  | -2.27774000 |
| H | -0.04774871 | 6.70947918  | -1.91504745 |
| H | 1.05750353  | 4.80967277  | 0.20810076  |
| H | 2.35184782  | 7.22367929  | -1.10221286 |
| H | 3.87534472  | 5.53032451  | -2.11658891 |
| H | -1.90847236 | 7.10224768  | -1.11985192 |
| H | -2.86672190 | 3.87780288  | -2.56125968 |
| H | -5.32268076 | 4.46060345  | -0.91431376 |
| H | -2.68939478 | 3.82662563  | 0.41681146  |
| H | -3.87742161 | 6.59960070  | 0.21875645  |
| H | -6.26684697 | 2.67709517  | -0.33948582 |
| H | -6.19459104 | 0.48426118  | 0.67961291  |
| H | -3.34754316 | 0.33843045  | -0.39581747 |
| H | -5.83373933 | -1.28537739 | -1.00895240 |
| H | -4.30125989 | 0.70731212  | -2.74317562 |
| H | -5.54960984 | -2.89417877 | -2.44336318 |
| H | -1.94459681 | -2.66545738 | -3.09190841 |
| H | -2.49182401 | -5.60348335 | -2.46304930 |
| H | -2.30556442 | -3.22563491 | -0.56396355 |
| H | -4.69700259 | -4.94544593 | -1.35012758 |
| H | -0.64566844 | -6.49129911 | -2.89618015 |
| H | 1.25405389  | -7.27132274 | -1.46135515 |
| H | 0.99473676  | -4.48535213 | -0.27140462 |
| H | 3.28880626  | -5.76326880 | -1.83262354 |
| H | 1.47422128  | -3.49312154 | -2.72461376 |
| H | 4.98098043  | -5.06992850 | -0.73003866 |
| H | 5.99913064  | -3.53279347 | 0.89796729  |
| H | 3.55118161  | -1.83978892 | 0.29862720  |
| H | 6.50460628  | -1.28047375 | -0.17037835 |

|   |             |              |             |
|---|-------------|--------------|-------------|
| H | 4.30316348  | -1.79733069  | -2.21613174 |
| H | 6.95640282  | 0.69147151   | -0.63637685 |
| H | 3.79357680  | 1.63950739   | -2.14794472 |
| H | 5.03098088  | 4.19890823   | -1.01577255 |
| H | 3.55839093  | 1.96437908   | 0.44375693  |
| H | 6.47561686  | 2.83104936   | 0.50037450  |
| H | 4.96276585  | 2.32296275   | -4.21873142 |
| H | 3.70796115  | 3.48984608   | -3.75019139 |
| H | 6.19653434  | -2.06274229  | -3.77352631 |
| H | 6.19941827  | -0.44581646  | -3.03533012 |
| H | 2.44789279  | -3.93279367  | -4.91742105 |
| H | 3.77197524  | -3.70801481  | -3.74952082 |
| H | -2.29145468 | -3.37530031  | -5.42260547 |
| H | -0.94935261 | -4.27472535  | -4.67864074 |
| H | -6.28239428 | 0.52281952   | -4.21043028 |
| H | -5.40078628 | -1.00978352  | -4.05689424 |
| H | -5.16388364 | 3.66894629   | -3.50224720 |
| H | -4.19037612 | 4.91602054   | -4.31783979 |
| H | -1.08059198 | 4.78667711   | -3.79577105 |
| H | 0.40529934  | 4.29834584   | -4.64552124 |
| H | 6.97345291  | 2.45722999   | 2.95228060  |
| H | 7.84804206  | 1.48232504   | 1.73675727  |
| H | 4.52491771  | -4.32363774  | 3.62380120  |
| H | 5.91723526  | -4.59022534  | 2.55578868  |
| H | 0.10626650  | -8.72788104  | 0.26340120  |
| H | -0.69104131 | -8.50739617  | -1.32043439 |
| H | -6.22269473 | -4.99447490  | 0.39726909  |
| H | -6.80381244 | -3.54361123  | -0.46938538 |
| H | -4.59516811 | 0.96934262   | 3.53502974  |
| H | -6.05802905 | 0.46275200   | 2.67405311  |
| H | -2.68489570 | 6.80812247   | 3.25152319  |
| H | -3.64279337 | 7.53721001   | 1.95103087  |
| H | 3.79049937  | 8.16960655   | 0.66025436  |
| H | 4.70158304  | 7.26342042   | -0.58124526 |
| H | -0.71495633 | 8.09231010   | 2.60156901  |
| H | -5.36538153 | 3.26864274   | 3.65813303  |
| H | -5.98998628 | -3.65115264  | 2.46232711  |
| H | -2.04540369 | -7.95338769  | 1.33787019  |
| H | 3.49242464  | -6.41119932  | 2.86657801  |
| H | 6.29505692  | 0.28689158   | 4.05374903  |
| H | 4.89208389  | 6.73706506   | 2.40338464  |
| H | -2.44046039 | 9.29871102   | 3.99005857  |
| H | -3.15835052 | 9.92941976   | 2.49119491  |
| H | -1.51480938 | 10.39665424  | 2.94765172  |
| H | 5.90199392  | 8.93699074   | 1.79367264  |
| H | 6.83106813  | 8.14946594   | 0.49691105  |
| H | 7.15558038  | 7.74247828   | 2.18586316  |
| H | 8.30156509  | 1.52819206   | 4.86779531  |
| H | 9.31024459  | 0.67696826   | 3.67512498  |
| H | 8.54339063  | -0.22799513  | 4.98470514  |
| H | 5.26189999  | -6.58446065  | 4.65238697  |
| H | 6.47028679  | -6.88260020  | 3.38311879  |
| H | 5.16379149  | -8.04485814  | 3.64788179  |
| H | -1.59897432 | -10.39368836 | 1.04855881  |
| H | -2.32041748 | -10.33081922 | -0.57652588 |
| H | -3.32508916 | -10.02842342 | 0.84542192  |
| H | -8.17046772 | -4.79142600  | 2.02701539  |
| H | -8.74577591 | -3.35480010  | 1.15004264  |

|   |             |             |             |
|---|-------------|-------------|-------------|
| H | -8.41046923 | -3.25705905 | 2.88430050  |
| H | -6.42633595 | 1.67157373  | 5.29942637  |
| H | -7.77905719 | 1.46281278  | 4.16645137  |
| H | -7.47876080 | 3.04485179  | 4.90183082  |
| H | 3.56360214  | 4.34635283  | 1.12386458  |
| H | 4.88738766  | -0.36360600 | 1.71597959  |
| H | 7.79504432  | -2.59958650 | -2.19130816 |
| H | 2.80116046  | -5.14267364 | 0.94085891  |
| H | 2.78426623  | -6.20502798 | -4.55810663 |
| H | -1.64007147 | -5.46368242 | 0.09628170  |
| H | -4.05558085 | -1.95005197 | 0.60999184  |
| H | -7.75181433 | -0.35564512 | -2.65437189 |
| H | -5.31515632 | 6.42950865  | -3.00145336 |
| H | -4.44402651 | 3.32510543  | 1.56591445  |
| H | -0.40193307 | 6.37096419  | 0.97051112  |
| H | 1.00673273  | 6.52821103  | -4.48576343 |
| H | 6.45368081  | 3.80631382  | -3.23384093 |
| H | -3.56975857 | -5.25363719 | -4.95206639 |
| H | -0.64529758 | 8.40356563  | 0.53417919  |
| H | 5.49630761  | 4.93520169  | 1.30393051  |
| H | 6.53009727  | -1.22367387 | 2.49069450  |
| H | 3.98835785  | -6.81030440 | 0.86398807  |
| H | -3.07663680 | -6.85826010 | -0.23845350 |
| H | -5.68247234 | -1.60006193 | 1.64088652  |
| H | -6.43141950 | 3.83711781  | 1.94138426  |

2-HP-B-CD:cis-(1R,4R)-SRT\_1\_MD E(Ha)= -7253.92660709

|    |               |               |               |
|----|---------------|---------------|---------------|
| C  | 0.0973136265  | 1.2140455078  | -3.5414296362 |
| C  | 0.0850839078  | 0.7126945546  | -2.1168530142 |
| C  | 0.5137576109  | -0.5855586582 | -1.8045439193 |
| C  | 1.0382779355  | -1.5508634880 | -2.8525540651 |
| C  | 0.9627127701  | -1.0139711496 | -4.2962617490 |
| C  | 1.1648355118  | 0.4920849940  | -4.3482261370 |
| C  | -0.2912254578 | 1.5889732102  | -1.0922498224 |
| C  | -0.2435404231 | 1.1971392383  | 0.2377042052  |
| C  | 0.1940074723  | -0.0870062007 | 0.5568770917  |
| C  | 0.5577852197  | -0.9636219081 | -0.4558551384 |
| C  | 0.4159768813  | -2.9326055241 | -2.7931304966 |
| C  | 1.1637367247  | -4.0370027169 | -3.2070238150 |
| C  | 0.6053491047  | -5.3074278468 | -3.2339894017 |
| C  | -0.7219192367 | -5.5075125708 | -2.8615152519 |
| C  | -1.4826170174 | -4.4066091361 | -2.4599025846 |
| C  | -0.9136759732 | -3.1334818313 | -2.4145314632 |
| Cl | -1.3850244815 | -7.0980137857 | -2.9046219993 |
| Cl | -3.1507743216 | -4.5932230428 | -2.0231603138 |
| N  | -1.2814989673 | 1.0897419195  | -4.1410760323 |
| C  | -1.4137795272 | 1.6319682466  | -5.5096904344 |
| O  | -5.4634004823 | -2.5970035394 | -0.1059662361 |
| C  | -4.3410330650 | -2.3733441790 | 0.7213983987  |
| C  | -4.3881378864 | -3.2847067900 | 1.9412887031  |
| C  | -3.2056696424 | -2.9803922821 | 2.8592356819  |
| O  | -3.2577390234 | -1.6342621295 | 3.2387088646  |
| C  | -3.1323811805 | -0.7316402550 | 2.1428947490  |
| C  | -4.2912705749 | -0.9144526404 | 1.1552949372  |
| O  | -2.0238144288 | -3.2554219437 | 2.1464259100  |
| C  | -1.1193952301 | -4.2205366014 | 2.6616384848  |
| C  | -0.5570557380 | -4.9268938805 | 1.4337251474  |
| C  | 0.5646317599  | -5.8618274376 | 1.8415267451  |
| C  | 1.5823267701  | -5.0882255922 | 2.6897215477  |
| O  | 0.9798911511  | -4.5158508055 | 3.8191736082  |
| C  | -0.0331744817 | -3.5559009034 | 3.5039770644  |
| O  | 2.1238462381  | -4.0899058514 | 1.8638286478  |
| C  | 3.5231315153  | -4.0436973644 | 1.6341037243  |
| C  | 3.6461637062  | -3.6672446920 | 0.1623633077  |
| C  | 5.0690231364  | -3.2718140482 | -0.1988222377 |
| C  | 5.5474857203  | -2.2196372356 | 0.8083119605  |
| O  | 5.5013727160  | -2.7275808858 | 2.1116313544  |
| C  | 4.1771403261  | -3.0248984831 | 2.5645028860  |
| O  | 4.6969421724  | -1.1100507164 | 0.6787617586  |
| C  | 5.2157510968  | 0.1769992845  | 0.3817152228  |
| C  | 4.2756916334  | 0.7492826828  | -0.6730086474 |
| C  | 4.5999551892  | 2.2110955268  | -0.9194310089 |
| C  | 4.6238598176  | 2.9697594533  | 0.4198972867  |
| O  | 5.5298781365  | 2.3858598951  | 1.3183512905  |
| C  | 5.2710862563  | 1.0225633812  | 1.6486361837  |
| O  | 3.3037459561  | 2.9675778170  | 0.9019672298  |
| C  | 2.9801914623  | 3.9136378746  | 1.9116808504  |
| C  | 2.7016998437  | 5.2835000873  | 1.2976028064  |
| C  | 1.9859470736  | 6.1958511109  | 2.2867175330  |
| C  | 0.7264106292  | 5.5042128852  | 2.8168703834  |
| O  | 1.1319950483  | 4.3315788559  | 3.4663297674  |
| C  | 1.7058073401  | 3.3751969633  | 2.5704861643  |
| O  | -0.1055287226 | 5.1801884180  | 1.7404008816  |

|   |               |               |               |
|---|---------------|---------------|---------------|
| C | -1.3381184241 | 5.8471647057  | 1.4880727833  |
| C | -1.2862132922 | 6.0993350873  | -0.0260348741 |
| C | -2.6384361132 | 6.3561343081  | -0.6830415021 |
| C | -3.6927331451 | 5.4064862977  | -0.1003636496 |
| O | -3.7026442112 | 5.4847816362  | 1.3011681649  |
| C | -2.5133072435 | 4.9609734785  | 1.8890411026  |
| O | -3.3866925594 | 4.1158902587  | -0.5329802270 |
| C | -4.4248504558 | 3.2095769058  | -0.8812006854 |
| C | -3.6864215865 | 2.1495374604  | -1.6808341806 |
| C | -4.5861851217 | 0.9739079114  | -2.0055364998 |
| C | -5.1071812639 | 0.3973932885  | -0.6792142185 |
| O | -5.8210472602 | 1.4049644995  | -0.0052553690 |
| C | -5.0831478654 | 2.5734075156  | 0.3480907199  |
| O | -2.6639958394 | 6.0902967026  | -2.0649523718 |
| C | -1.6972188316 | 6.6799947304  | -2.9117192452 |
| C | -1.4778815569 | 5.7379798785  | -4.0888817162 |
| O | -1.0233896176 | 4.4636358274  | -3.6359580220 |
| O | -0.4211888379 | 7.1936930221  | -0.2896936149 |
| O | 1.6923676489  | 7.3935205687  | 1.5879625715  |
| C | 1.6076858974  | 8.5574753844  | 2.4173762016  |
| C | 0.7737108610  | 9.6271168810  | 1.7284189258  |
| O | -0.5730196312 | 9.2190075835  | 1.6259410376  |
| O | 3.9159029156  | 5.8714668929  | 0.8779344377  |
| O | 3.6361301895  | 2.7233462518  | -1.8157185667 |
| C | 3.8936258571  | 4.0228567807  | -2.3109134724 |
| C | 2.6682324916  | 4.4101842828  | -3.1198509451 |
| O | 1.5096040178  | 4.2619243414  | -2.2963007321 |
| O | 4.3982783239  | 0.0036565499  | -1.8655426105 |
| O | 5.1581161100  | -2.6603035300 | -1.4708503968 |
| C | 5.2763960090  | -3.5369720000 | -2.5853652075 |
| C | 5.3824930715  | -2.7083629297 | -3.8577957415 |
| O | 4.1869353374  | -1.9732744611 | -4.0859847954 |
| O | 3.1968177430  | -4.7280049044 | -0.6586128329 |
| O | 1.2199882278  | -6.3746263892 | 0.6990133986  |
| C | 1.6276107646  | -7.7344194522 | 0.8343704872  |
| C | 2.6662313697  | -8.0686946026 | -0.2235100007 |
| O | 3.8692451056  | -7.3679155533 | 0.0067120800  |
| O | -1.5712468949 | -5.6548710013 | 0.7712011290  |
| O | -4.3544942235 | -4.6215485189 | 1.4720749955  |
| C | -5.0292517437 | -5.5512585470 | 2.3230862722  |
| C | -4.4921409171 | -6.9563111223 | 2.0916386548  |
| O | -3.1687186211 | -7.0729172587 | 2.5618038727  |
| O | -4.0044777364 | -0.0762597153 | 0.0370041759  |
| O | -3.8271485893 | 0.0770124932  | -2.7755610847 |
| C | -4.5403352438 | -1.0101100020 | -3.3305701384 |
| C | -3.9662504298 | -1.3128601891 | -4.7068557438 |
| O | -2.5416725387 | -1.4256900910 | -4.6619494562 |
| O | -3.1525391024 | 2.6861696208  | -2.8787310641 |
| C | -6.0809899294 | 3.4580879614  | 1.0898990968  |
| O | -6.0690043594 | 3.2382686923  | 2.4861177520  |
| C | -2.9852066544 | 0.6650259480  | 2.6977783049  |
| O | -4.1706616382 | 1.1194355443  | 3.3026755712  |
| C | -0.5532193466 | -3.0427364851 | 4.8350550441  |
| O | -1.2239444790 | -4.0424675112 | 5.5639258101  |
| C | 4.3222451479  | -3.5367793156 | 3.9862939688  |
| O | 5.0220204914  | -4.7545522848 | 4.0493019618  |
| C | 6.4002806543  | 0.6072421293  | 2.5766283979  |
| O | 7.6528839349  | 0.6896061562  | 1.9412542523  |



|   |               |               |               |
|---|---------------|---------------|---------------|
| C | 1.8880333600  | 2.1104363094  | 3.3842685838  |
| O | 0.6480511759  | 1.6221620869  | 3.8390730365  |
| C | -2.7674228537 | 4.8646862842  | 3.3819733316  |
| O | -3.6828262751 | 3.8485607446  | 3.7022444615  |
| C | -2.7321964263 | 5.5096905806  | -4.9087531397 |
| C | 2.7263300169  | 5.8380440056  | -3.6144400122 |
| C | 6.6038021370  | -1.8021376832 | -3.8853758421 |
| C | 2.9852865130  | -9.5525194776 | -0.2018486788 |
| C | -5.3410154661 | -7.9725452839 | 2.8357142005  |
| C | 0.8140710102  | 10.9184329498 | 2.5262859164  |
| C | -4.5968682854 | -2.5429005631 | -5.3321671637 |
| H | -4.6899131292 | 5.7098432652  | -0.4397497472 |
| H | -2.9476760696 | 7.3898440953  | -0.4630844145 |
| H | -0.8797465174 | 5.1833262763  | -0.4782661613 |
| H | -1.3819324799 | 6.8124545032  | 2.0109817886  |
| H | 0.2020253922  | 6.1156436880  | 3.5611197767  |
| H | 2.6563347270  | 6.4057996573  | 3.1313828473  |
| H | 2.0408538940  | 5.1227393461  | 0.4315689826  |
| H | 3.7979558581  | 3.9959383786  | 2.6424128101  |
| H | 4.9851786515  | 3.9935044315  | 0.2980707365  |
| H | 5.6042492656  | 2.2848530725  | -1.3653623752 |
| H | 3.2460191754  | 0.6910850210  | -0.2899350237 |
| H | 6.2269411724  | 0.0971111019  | -0.0390107499 |
| H | 6.5897850538  | -1.9420976130 | 0.6174705569  |
| H | 5.7375298083  | -4.1430698257 | -0.1477063643 |
| H | 3.0239361217  | -2.7770022171 | -0.0061683204 |
| H | 3.9756115982  | -5.0308224903 | 1.7990761321  |
| H | 2.3681326724  | -5.7530110582 | 3.0644643651  |
| H | 0.1405903652  | -6.6787306299 | 2.4410291447  |
| H | -0.1500955691 | -4.1643886293 | 0.7534157866  |
| H | -1.6546580579 | -4.9540277127 | 3.2781253679  |
| H | -3.2370859031 | -3.5604454252 | 3.7883158408  |
| H | -5.3220149019 | -3.0956382470 | 2.4890601797  |
| H | -3.4127592048 | -2.5847271323 | 0.1698894855  |
| H | -5.2365370306 | -0.6186020008 | 1.6256323263  |
| H | -5.8362589012 | -0.4022037315 | -0.8414259089 |
| H | -5.4644424145 | 1.3159774067  | -2.5773954983 |
| H | -2.8781346683 | 1.7660607591  | -1.0433285477 |
| H | -5.1673422422 | 3.7111658214  | -1.5208845866 |
| H | -4.2746739960 | 2.3094336222  | 1.0380086433  |
| H | -2.2033906191 | -0.9485263104 | 1.5978307102  |
| H | 0.4023736427  | -2.7229232784 | 2.9355190221  |
| H | 3.5687524470  | -2.1107563685 | 2.5662459198  |
| H | 4.3101851766  | 0.9293016149  | 2.1714228935  |
| H | 0.9921864573  | 3.1614069993  | 1.7682019019  |
| H | -2.3260221949 | 3.9476638664  | 1.5132662318  |
| H | 0.4007412318  | 7.0528451405  | 0.2172397407  |
| H | -2.3393560619 | -5.0629414337 | 0.6924994160  |
| H | -2.6661136490 | 3.5100530889  | -2.6836343990 |
| H | 3.6949510982  | 6.7714556941  | 0.6056331318  |
| H | 4.5003493814  | -0.9307907607 | -1.5934259283 |
| H | 2.3445045323  | -5.0370560562 | -0.2942765328 |
| H | -5.5343168088 | -3.5568888171 | -0.1903784506 |
| H | -0.7503486094 | 6.8336270005  | -2.3853509144 |
| H | -2.0421233472 | 7.6608080624  | -3.2741495954 |
| H | -0.7094468770 | 6.2015363421  | -4.7291564135 |
| H | -2.5246830151 | 4.8484535602  | -5.7543371532 |
| H | -3.1084119071 | 6.4584263164  | -5.3010013930 |

|   |               |                |               |
|---|---------------|----------------|---------------|
| H | -3.5133827187 | 5.0547170510   | -4.2949730421 |
| H | -0.1884461609 | 4.5629987052   | -3.1424423101 |
| H | 4.7932152516  | 4.0339525255   | -2.9440518094 |
| H | 4.0267308851  | 4.7450705461   | -1.4921619795 |
| H | 2.5928488293  | 3.7202384371   | -3.9757257616 |
| H | 2.7825818293  | 6.5338784121   | -2.7718300777 |
| H | 1.8345777015  | 6.0794917565   | -4.1993252229 |
| H | 3.5988473120  | 5.9912359014   | -4.2558542036 |
| H | 1.6690123849  | 3.4669900017   | -1.7611547296 |
| H | 4.4020756230  | -4.1931974089  | -2.6357866944 |
| H | 6.1749203785  | -4.1613952894  | -2.4704770168 |
| H | 5.4506314874  | -3.4307275848  | -4.6818274043 |
| H | 6.5482539661  | -1.0597146913  | -3.0834980728 |
| H | 6.6571397441  | -1.2763087574  | -4.8421430202 |
| H | 7.5254911283  | -2.3772649715  | -3.7573736976 |
| H | 4.2679346192  | -1.1232343803  | -3.6311338460 |
| H | 0.7466304973  | -8.3841874817  | 0.7395740597  |
| H | 2.0870794932  | -7.8995278664  | 1.8194172669  |
| H | 2.2402787628  | -7.8028000870  | -1.2060150641 |
| H | 3.7446500896  | -9.7746519638  | -0.9545459243 |
| H | 2.0986482586  | -10.1591232882 | -0.4069372757 |
| H | 3.3882880348  | -9.8381603373  | 0.7750035469  |
| H | 3.7649098825  | -6.4582617026  | -0.3136944531 |
| H | -2.1504477062 | 0.6476825613   | 3.4124887683  |
| H | -2.6855521244 | 1.3105083248   | 1.8572534187  |
| H | -3.9468997365 | 1.9793977086   | 3.6991808335  |
| H | 0.2941164132  | -2.6244238778  | 5.3982316606  |
| H | -1.2698626189 | -2.2359553900  | 4.6570768503  |
| H | -0.5894613705 | -4.7529653948  | 5.7153187889  |
| H | -6.1095864574 | -5.5043590567  | 2.1233208717  |
| H | -4.8600708507 | -5.2954508560  | 3.3772791045  |
| H | -4.5404957080 | -7.1651311200  | 1.0100382002  |
| H | -6.3811446684 | -7.9578308956  | 2.4973679364  |
| H | -5.3181581066 | -7.7700790963  | 3.9112322392  |
| H | -4.9348889030 | -8.9733725416  | 2.6751856478  |
| H | -2.5685383031 | -6.7153414484  | 1.8851020719  |
| H | 4.8059997945  | -2.7532050178  | 4.5884741490  |
| H | 3.3263485150  | -3.7136565445  | 4.4035255884  |
| H | 5.9023500714  | -4.5904391467  | 3.6914583038  |
| H | 2.6236693500  | 8.9193588013   | 2.6268588012  |
| H | 1.1244885613  | 8.3097218179   | 3.3716276829  |
| H | 1.2024257637  | 9.8054797442   | 0.7289367852  |
| H | 0.4008189883  | 10.7596684840  | 3.5273175705  |
| H | 0.2023046137  | 11.6729764276  | 2.0279912793  |
| H | 1.8336815995  | 11.3019706947  | 2.6237584240  |
| H | -0.6644317459 | 8.6623049103   | 0.8354132410  |
| H | 6.3591950861  | 1.2351688325   | 3.4788820350  |
| H | 6.2575994808  | -0.4335326252  | 2.8807546106  |
| H | 7.7729282014  | 1.6141593631   | 1.6939518644  |
| H | -5.6057783033 | -0.7624337790  | -3.4471916029 |
| H | -4.4775537288 | -1.8833748887  | -2.6652779583 |
| H | -4.1462720507 | -0.4398086382  | -5.3459091802 |
| H | -4.4234615706 | -3.4309196488  | -4.7137198641 |
| H | -4.1741689075 | -2.7240550844  | -6.3230862505 |
| H | -5.6784272295 | -2.4169336990  | -5.4387332738 |
| H | -2.3063570486 | -2.2467018167  | -4.2077446501 |
| H | 2.3193739968  | 1.3378162668   | 2.7449657612  |
| H | 2.5811745157  | 2.3040362006   | 4.2181049796  |

|   |               |               |               |
|---|---------------|---------------|---------------|
| H | 0.2528397256  | 2.3298727609  | 4.3620690926  |
| H | -5.8524254757 | 4.5157872240  | 0.9581266496  |
| H | -7.0760298983 | 3.2630454266  | 0.6674834500  |
| H | -5.9563419502 | 2.2887923699  | 2.6464582340  |
| H | -1.8265412056 | 4.6132556099  | 3.8833649765  |
| H | -3.1034937037 | 5.8436160159  | 3.7551359357  |
| H | -4.5378086518 | 3.9890242711  | 3.2481220991  |
| H | -1.6315871167 | 0.1107479866  | -4.1351250771 |
| H | -1.9598039695 | 1.6300555177  | -3.5491568640 |
| H | -2.4753517369 | 1.6612681292  | -5.7574775607 |
| H | -1.0150774424 | 2.6473510196  | -5.5153238526 |
| H | -0.8902385203 | 0.9977068179  | -6.2238781831 |
| H | 2.1952434233  | -3.8922273531 | -3.5131717529 |
| H | 1.1948633375  | -6.1628766785 | -3.5462701352 |
| H | -1.5126112899 | -2.2999737917 | -2.0551537432 |
| H | -0.6193226460 | 2.5942084538  | -1.3490209934 |
| H | -0.5323857686 | 1.8843182871  | 1.0256704163  |
| H | 0.2553863052  | -0.3934006024 | 1.5971813515  |
| H | 0.8959638391  | -1.9643428268 | -0.1997891909 |
| H | 2.1073318048  | -1.6754421962 | -2.6325790101 |
| H | -0.0001199193 | -1.2776825677 | -4.7522922854 |
| H | 1.7340679920  | -1.5177375707 | -4.8859050693 |
| H | 1.1959993941  | 0.8523121039  | -5.3817277889 |
| H | 2.1259024255  | 0.7629248893  | -3.8918860070 |
| H | 0.2943594001  | 2.2890941750  | -3.5412650212 |

2-HP-B-CD:cis-(1R,4R)-SRT\_2\_MD E(Ha)= -7253.92568755

|    |               |               |               |
|----|---------------|---------------|---------------|
| C  | 0.2939245800  | 0.9334582727  | 4.0809949028  |
| C  | 0.1852978482  | 0.6962068984  | 2.5933272529  |
| C  | -0.1436129185 | -0.5607384703 | 2.0688913721  |
| C  | -0.4492766012 | -1.7571125971 | 2.9551909359  |
| C  | -0.1332462829 | -1.5118329699 | 4.4416063794  |
| C  | -0.4935141782 | -0.0994657848 | 4.8712071824  |
| C  | 0.3672327846  | 1.7848631247  | 1.7309168326  |
| C  | 0.2144129902  | 1.6432285631  | 0.3598840414  |
| C  | -0.1267238954 | 0.3978717900  | -0.1707828386 |
| C  | -0.2932173947 | -0.6862568520 | 0.6810485747  |
| C  | 0.2248631740  | -3.0409840171 | 2.5171947367  |
| C  | -0.4794872519 | -4.2439786303 | 2.5086142709  |
| C  | 0.1693705452  | -5.4472269534 | 2.2551882660  |
| C  | 1.5392603329  | -5.4789079144 | 2.0127900718  |
| C  | 2.2460418726  | -4.2712914874 | 1.9892512528  |
| C  | 1.5924347354  | -3.0655300597 | 2.2258035925  |
| Cl | 2.3225533118  | -6.9921305637 | 1.7585405807  |
| Cl | 3.9556721325  | -4.2494675606 | 1.6853755133  |
| N  | 1.7506090519  | 0.9772761547  | 4.4812423574  |
| C  | 1.9985119923  | 1.4522672415  | 5.8607344026  |
| C  | 0.5717220486  | 5.9007270645  | 0.4389888349  |
| C  | 1.8320202154  | 6.3355366993  | 1.1835990046  |
| C  | 3.0829257876  | 5.7308800951  | 0.5352854182  |
| O  | 3.0961597375  | 5.9602483575  | -0.8464175967 |
| C  | 2.0464514629  | 5.2757238435  | -1.5304579798 |
| C  | 0.7007509197  | 5.8410517417  | -1.0880882545 |
| O  | 3.0650468504  | 4.3683938214  | 0.8290880113  |
| C  | 4.2662029810  | 3.6595791976  | 1.0975082249  |
| C  | 3.7528571817  | 2.4703466386  | 1.8924586832  |
| C  | 4.8260911801  | 1.4260845427  | 2.0902656052  |
| C  | 5.3054414998  | 1.0052621602  | 0.6913063113  |
| O  | 5.8640926912  | 2.1269518744  | 0.0535312433  |
| C  | 4.9784451726  | 3.2216781646  | -0.1848037411 |
| O  | 4.2010256387  | 0.4714438182  | 0.0187190058  |
| C  | 4.4730543113  | -0.2091383349 | -1.2017083332 |
| C  | 4.7136659539  | -1.6901465994 | -0.9444300016 |
| C  | 4.7953242105  | -2.4270845448 | -2.2722849254 |
| C  | 3.5284311824  | -2.1709157421 | -3.0859705733 |
| O  | 3.3762899402  | -0.7995224772 | -3.2910264860 |
| C  | 3.2247226685  | -0.0533576041 | -2.0822396480 |
| O  | 2.4412354550  | -2.7089325401 | -2.3720869359 |
| C  | 1.5668364988  | -3.6201789577 | -3.0125158109 |
| C  | 1.2169844873  | -4.6381547162 | -1.9258598842 |
| C  | 0.1780718478  | -5.6167589259 | -2.4350541394 |
| C  | -1.0143897391 | -4.8416316025 | -3.0143600549 |
| O  | -0.6054242162 | -3.9335562783 | -4.0045247292 |
| C  | 0.3006213757  | -2.9358241738 | -3.5219025907 |
| O  | -1.6278273438 | -4.1649506468 | -1.9543370489 |
| C  | -3.0137550970 | -4.3508025893 | -1.7006460099 |
| C  | -3.0952051491 | -4.1957004394 | -0.1824472263 |
| C  | -4.5111237092 | -3.9912570163 | 0.3171948716  |
| C  | -5.1787790138 | -2.9096989409 | -0.5480867246 |
| O  | -5.1759408430 | -3.3056248694 | -1.8958543872 |
| C  | -3.8655395803 | -3.3391434102 | -2.4590949633 |
| O  | -4.4364819628 | -1.7378190357 | -0.3550713189 |
| C  | -5.1001262667 | -0.5036047133 | -0.1311650778 |

|   |               |               |               |
|---|---------------|---------------|---------------|
| C | -4.1467804488 | 0.2529428615  | 0.7885618308  |
| C | -4.6741063450 | 1.6556864590  | 1.0241326866  |
| C | -4.8708054259 | 2.3244520335  | -0.3444533630 |
| O | -5.7683000537 | 1.5890332971  | -1.1322320620 |
| C | -5.3687492092 | 0.2514081946  | -1.4301447788 |
| O | -3.5948480395 | 2.4095653409  | -0.9238916041 |
| C | -3.3423059572 | 3.4282204688  | -1.8813856261 |
| C | -3.2075107053 | 4.7821207790  | -1.1910720259 |
| C | -2.5133755493 | 5.8033058412  | -2.0782894606 |
| C | -1.1787876426 | 5.2463624723  | -2.5766755071 |
| O | -1.4303365796 | 4.0799400250  | -3.2909997363 |
| C | -1.9969917698 | 3.0260553038  | -2.5105874026 |
| O | -3.8023874719 | 2.4717030825  | 1.7750334368  |
| C | -3.9931205742 | 2.4782411358  | 3.1763244139  |
| C | -3.2002339001 | 3.6652297546  | 3.7058453125  |
| O | -1.8311935924 | 3.5127068294  | 3.3262707634  |
| O | -3.9947242818 | -0.4622091431 | 2.0083599209  |
| O | -4.4722200452 | -3.5599690304 | 1.6637697727  |
| C | -5.6148880129 | -3.9387402397 | 2.4288258865  |
| C | -5.8770268121 | -2.9163699151 | 3.5242883180  |
| O | -6.3362651296 | -1.6982125760 | 2.9795655336  |
| O | -2.4958174064 | -5.3223713058 | 0.4302918346  |
| O | -0.2811417481 | -6.4387336370 | -1.3844597641 |
| C | -0.5287603693 | -7.7892040093 | -1.7626360696 |
| C | -1.5880323557 | -8.3916102899 | -0.8533154503 |
| O | -2.8246915212 | -7.7289193394 | -1.0280162483 |
| O | 2.3693444123  | -5.3369190932 | -1.5093784447 |
| O | 4.9710045531  | -3.8068693216 | -2.0091794760 |
| C | 5.7424471833  | -4.4858142004 | -3.0051844691 |
| C | 5.2904090144  | -5.9310056197 | -3.1349437087 |
| O | 3.9794040693  | -5.9901073505 | -3.6544621901 |
| O | 5.9026351710  | -1.8723557964 | -0.2042247572 |
| O | 4.2652891401  | 0.3856770355  | 2.8515625887  |
| C | 5.1702662831  | -0.6316875718 | 3.2330465095  |
| C | 4.7494176510  | -1.1559662365 | 4.5969416488  |
| O | 3.3548856813  | -1.4706971642 | 4.6168851727  |
| O | 3.2399347164  | 2.9057104806  | 3.1444845493  |
| O | 1.8614007155  | 5.8746433947  | 2.5167880943  |
| C | 0.9016496386  | 6.4031702418  | 3.4140850703  |
| C | 0.9675536879  | 5.5929966079  | 4.7014157288  |
| O | 0.6548274529  | 4.2286957585  | 4.4501233709  |
| O | -0.4962494721 | 6.7611298865  | 0.8055558146  |
| O | -0.3433559012 | 4.9558319378  | -1.4807509908 |
| O | -2.3537089636 | 6.9706736482  | -1.2851383094 |
| C | -2.3075096473 | 8.1963257684  | -2.0197676526 |
| C | -1.7616044166 | 9.3035277484  | -1.1314189306 |
| O | -0.4083722167 | 9.0684456357  | -0.8089804644 |
| O | -4.4815313515 | 5.2582280980  | -0.8120298524 |
| C | -2.0752557337 | 1.7995254496  | -3.3996959978 |
| O | -0.8147085775 | 1.1740704758  | -3.4149217233 |
| C | 2.3211481528  | 5.4082067652  | -3.0175481948 |
| O | 3.4147548589  | 4.6330238646  | -3.4392400533 |
| C | 5.8362211162  | 4.3067734000  | -0.8276155418 |
| O | 5.8482558912  | 4.2232815942  | -2.2389066237 |
| C | 2.9042514898  | 1.3714049613  | -2.4629371171 |
| O | 4.0138618424  | 1.9877424908  | -3.0675260154 |
| C | 0.5036535429  | -1.9621316482 | -4.6642993952 |
| O | -0.6769564110 | -1.2219878345 | -4.9216435812 |

|   |               |               |               |
|---|---------------|---------------|---------------|
| C | -4.0452020638 | -3.6668105129 | -3.9296300459 |
| O | -4.7642657829 | -2.6629642914 | -4.6025521688 |
| C | -6.5132596707 | -0.3319142643 | -2.2403891578 |
| O | -7.6926036165 | -0.4497478215 | -1.4823587803 |
| C | -3.7534813850 | 4.9991461101  | 3.2286371385  |
| C | -1.7892180805 | -9.8626093561 | -1.1701339482 |
| C | 6.2097697559  | -6.6899741449 | -4.0759564460 |
| C | 5.5863153239  | -2.3394351239 | 5.0437617982  |
| C | 2.3289126528  | 5.6399051926  | 5.3674798693  |
| C | -6.9400674888 | -3.4288186446 | 4.4799753638  |
| C | -1.8481390718 | 10.6423029623 | -1.8412438752 |
| H | -5.3162369826 | 3.3136968007  | -0.2250436003 |
| H | -5.6582139483 | 1.6063126096  | 1.5143549662  |
| H | -3.1695393009 | 0.3396784175  | 0.2953462359  |
| H | -6.0508556016 | -0.6770963154 | 0.3922049275  |
| H | -6.2285458938 | -2.7596214139 | -0.2729588529 |
| H | -5.0750443064 | -4.9286692730 | 0.2201456534  |
| H | -2.5275269301 | -3.2911001270 | 0.0779669293  |
| H | -3.3126424759 | -5.3760355291 | -1.9627354010 |
| H | -1.7151352752 | -5.5316601469 | -3.4973577669 |
| H | 0.6280405178  | -6.2213944799 | -3.2348497156 |
| H | 0.7866993911  | -4.0875432048 | -1.0759748778 |
| H | 2.0844988543  | -4.1358513555 | -3.8345429928 |
| H | 3.5967465409  | -2.6274058212 | -4.0805793062 |
| H | 5.6549372380  | -2.0345256174 | -2.8331767916 |
| H | 3.8513528574  | -2.0722689051 | -0.3781361838 |
| H | 5.3359654957  | 0.2447659587  | -1.7034336120 |
| H | 6.1189402334  | 0.2749048921  | 0.7421563818  |
| H | 5.6936498970  | 1.8594060616  | 2.6140123978  |
| H | 2.9534102342  | 2.0047797987  | 1.3025564544  |
| H | 4.9301673639  | 4.2657740992  | 1.7339153395  |
| H | 3.9824998145  | 6.2103901952  | 0.9398590860  |
| H | 1.9140958202  | 7.4322254336  | 1.1382564575  |
| H | 0.3531712131  | 4.8740020097  | 0.7674755727  |
| H | 0.5482636491  | 6.8490191152  | -1.4990984306 |
| H | -0.6843947776 | 5.9387985186  | -3.2690988944 |
| H | -3.1502255358 | 6.0207909481  | -2.9464818178 |
| H | -2.5795624484 | 4.6121856377  | -0.3033502339 |
| H | -4.1438987304 | 3.4728131719  | -2.6330643084 |
| H | -1.3309006531 | 2.7857497918  | -1.6752613975 |
| H | 2.0682468378  | 4.2098451790  | -1.2709986205 |
| H | 4.2085217079  | 2.9256883076  | -0.9041913203 |
| H | 2.3664731826  | -0.4443527163 | -1.5186530620 |
| H | -0.1651409722 | -2.3953892912 | -2.6871867487 |
| H | -3.4006575701 | -2.3496821087 | -2.3715522350 |
| H | -4.4546468774 | 0.2484428698  | -2.0392803423 |
| H | -3.8301080850 | -1.3850356535 | 1.7429996748  |
| H | 2.6692815447  | 3.6773916384  | 2.9739957940  |
| H | -4.3424780979 | 6.1498726241  | -0.4682097739 |
| H | -1.6208816104 | -5.4124232629 | 0.0089229268  |
| H | 3.0587112962  | -4.6700727891 | -1.3452199146 |
| H | 6.0710749753  | -2.8236020696 | -0.2158620042 |
| H | -1.2326390459 | 6.6080378588  | 0.1829634648  |
| H | -3.6302299850 | 1.5423400893  | 3.6198472306  |
| H | -5.0571079788 | 2.5917135964  | 3.4318742165  |
| H | -3.2137526138 | 3.6267444155  | 4.8012265145  |
| H | -4.7531636619 | 5.1722840647  | 3.6396218669  |
| H | -3.8276416963 | 5.0154403706  | 2.1375131586  |

|   |               |                |               |
|---|---------------|----------------|---------------|
| H | -3.1047187375 | 5.8171427572   | 3.5523290282  |
| H | -1.8351851783 | 3.2067779852   | 2.4072694508  |
| H | 0.4085603115  | -8.3598813076  | -1.7075594556 |
| H | -0.9066740589 | -7.8367501091  | -2.7937358789 |
| H | -1.2392633174 | -8.2883802380  | 0.1869731655  |
| H | -2.5442152510 | -10.2835029695 | -0.5028620330 |
| H | -0.8621338376 | -10.4313958537 | -1.0540528940 |
| H | -2.1472880333 | -9.9801221042  | -2.1977731274 |
| H | -2.8650025844 | -6.9862067692  | -0.4052090939 |
| H | 6.8066877454  | -4.4278129984  | -2.7363499014 |
| H | 5.6055677392  | -4.0042921778  | -3.9821282690 |
| H | 5.3313983486  | -6.3938745182  | -2.1358899146 |
| H | 7.2443853644  | -6.6905455488  | -3.7204934022 |
| H | 6.1823973221  | -6.2428527956  | -5.0748233143 |
| H | 5.8697196601  | -7.7238559795  | -4.1633524317 |
| H | 3.3596685427  | -5.9435312805  | -2.9059342547 |
| H | 6.1943038056  | -0.2375261687  | 3.3126444976  |
| H | 5.1821294924  | -1.4314249295  | 2.4776010660  |
| H | 4.8496050361  | -0.3352834233  | 5.3172952192  |
| H | 5.4834439983  | -3.1752676895  | 4.3421972978  |
| H | 5.2673022372  | -2.6767618246  | 6.0324732283  |
| H | 6.6464463084  | -2.0746755561  | 5.0962222017  |
| H | 3.2199239297  | -2.2823098967  | 4.1103988494  |
| H | 1.4505624408  | 5.0394110282   | -3.5688062731 |
| H | 2.4655924181  | 6.4704603220   | -3.2637103653 |
| H | 4.2278359664  | 4.8601712686   | -2.9471009047 |
| H | 5.4513530236  | 5.3006313830   | -0.5911308112 |
| H | 6.8516883727  | 4.2239820253   | -0.4162573453 |
| H | 5.8191009100  | 3.2873973778   | -2.4857491639 |
| H | -0.1053518273 | 6.3332958667   | 2.9872035675  |
| H | 1.1060280812  | 7.4649796471   | 3.6228917886  |
| H | 0.2216059454  | 6.0309906534   | 5.3847036377  |
| H | 2.3138472669  | 5.0780359054   | 6.3052508906  |
| H | 2.6094568273  | 6.6722844420   | 5.5939217957  |
| H | 3.0940331679  | 5.2102219159   | 4.7165229350  |
| H | -0.2520945451 | 4.1659961217   | 4.0961272878  |
| H | 2.0329426952  | 1.3561791018   | -3.1322480520 |
| H | 2.5970092372  | 1.8868744229   | -1.5382999667 |
| H | 3.7085111852  | 2.8619191461   | -3.3819714513 |
| H | -5.4471319385 | -4.9376333444  | 2.8558588229  |
| H | -6.5091196504 | -3.9787730343  | 1.7927590234  |
| H | -4.9339608852 | -2.7650736208  | 4.0760364798  |
| H | -7.1276813307 | -2.6835631055  | 5.2559113638  |
| H | -6.6389966334 | -4.3654897688  | 4.9580995767  |
| H | -7.8795763418 | -3.5958965815  | 3.9436473224  |
| H | -5.5684894216 | -1.1577014358  | 2.7332474100  |
| H | 1.2786089184  | -1.2378914564  | -4.4017689549 |
| H | 0.8243919956  | -2.5104914627  | -5.5612430873 |
| H | -1.3872449400 | -1.8500613690  | -5.0985839470 |
| H | -3.3190387133 | 8.4376716762   | -2.3749125519 |
| H | -1.6462889575 | 8.0933851669   | -2.8907789297 |
| H | -2.3770724385 | 9.3394404619   | -0.2172884929 |
| H | -2.8816124672 | 10.9014479883  | -2.0882247427 |
| H | -1.2601431732 | 10.6247871161  | -2.7642888259 |
| H | -1.4370518441 | 11.4221787702  | -1.1972066491 |
| H | -0.3738976071 | 8.4203937540   | -0.0859193872 |
| H | -3.0588868765 | -3.7206175345  | -4.4000651751 |
| H | -4.5241928839 | -4.6532230378  | -4.0265549853 |

|   |               |               |               |
|---|---------------|---------------|---------------|
| H | -5.6784112045 | -2.7263532144 | -4.3061990926 |
| H | -2.8511491413 | 1.1318090787  | -2.9998957780 |
| H | -2.3894909278 | 2.1201077650  | -4.4044276316 |
| H | -0.8536405395 | 0.4013186282  | -4.0069525000 |
| H | -6.6553606705 | 0.2998556635  | -3.1291817232 |
| H | -6.2396660362 | -1.3354189833 | -2.5720666802 |
| H | -7.9261910481 | 0.4414348153  | -1.1970172108 |
| H | 2.2233898022  | 0.0650519960  | 4.3432406845  |
| H | 2.2546517660  | 1.6496874627  | 3.8559874651  |
| H | 1.6286774946  | 0.7287609007  | 6.5862420279  |
| H | 3.0748051282  | 1.5750850855  | 5.9863073433  |
| H | 1.5044944613  | 2.4181371516  | 5.9773522604  |
| H | -1.5524670257 | -4.2510347382 | 2.6773684980  |
| H | -0.3864464467 | -6.3783423200 | 2.2533463971  |
| H | 2.1542850465  | -2.1359114956 | 2.1652496442  |
| H | 0.6194854625  | 2.7550773614  | 2.1543853425  |
| H | 0.3452973756  | 2.5002457694  | -0.2951964319 |
| H | -0.2842401421 | 0.2995946634  | -1.2429608532 |
| H | -0.5555619026 | -1.6577841155 | 0.2685138583  |
| H | -1.5350476387 | -1.9138862225 | 2.8788408700  |
| H | 0.9309836541  | -1.6966691747 | 4.6290992645  |
| H | -0.6731373804 | -2.2484409302 | 5.0445719044  |
| H | -0.3528955479 | 0.0339337092  | 5.9486581945  |
| H | -1.5539638653 | 0.0960705341  | 4.6732925854  |
| H | -0.0789737085 | 1.9354885389  | 4.3041679580  |



255

2-HP-B-CD:cis-(1R,4R)-SRT\_3\_MD E(Ha)= -7253.92367314

|    |               |               |               |
|----|---------------|---------------|---------------|
| C  | -0.4780708368 | -1.2427756292 | 3.9515678326  |
| C  | -0.2755805278 | -0.7998388259 | 2.5202882183  |
| C  | 0.0001024296  | 0.5335380435  | 2.1874471892  |
| C  | 0.1382910167  | 1.6262352701  | 3.2353194225  |
| C  | -0.3209412993 | 1.1731487605  | 4.6274173794  |
| C  | 0.1238474555  | -0.2492703281 | 4.9343148811  |
| C  | -0.3192226838 | -1.7726032998 | 1.5131821134  |
| C  | -0.0776272043 | -1.4409355168 | 0.1891597739  |
| C  | 0.2227900755  | -0.1208975767 | -0.1475160714 |
| C  | 0.2477434953  | 0.8492342377  | 0.8446122132  |
| C  | -0.5667308163 | 2.9138833896  | 2.8554773219  |
| C  | 0.1051949151  | 4.1345568239  | 2.8614441837  |
| C  | -0.5725539305 | 5.3199791769  | 2.5959310284  |
| C  | -1.9350091081 | 5.3111701248  | 2.3159265723  |
| C  | -2.6098584358 | 4.0845743772  | 2.2858840778  |
| C  | -1.9314358816 | 2.9018024178  | 2.5526704108  |
| Cl | -2.7521866917 | 6.8006945800  | 2.0212531076  |
| Cl | -4.3052800100 | 4.0125570822  | 1.9189261633  |
| N  | -1.9491718234 | -1.4856837799 | 4.1969745852  |
| C  | -2.2723459756 | -2.1312185551 | 5.4865578395  |
| C  | -0.0144523773 | -6.0114231257 | -0.0923056117 |
| C  | -1.3119364092 | -6.6239070250 | 0.4263180107  |
| C  | -2.5203351737 | -5.9869035666 | -0.2722824856 |
| O  | -2.3687856518 | -6.0218477352 | -1.6656786062 |
| C  | -1.3071440241 | -5.1855980068 | -2.1253968604 |
| C  | 0.0189060347  | -5.7267434848 | -1.6014080486 |
| O  | -2.6234444157 | -4.6786375270 | 0.2015210140  |
| C  | -3.8999664483 | -4.0935713106 | 0.4118131835  |
| C  | -3.5781585140 | -2.9488492399 | 1.3564972529  |
| C  | -4.7706540323 | -2.0402520515 | 1.5501837221  |
| C  | -5.1601662685 | -1.5083323696 | 0.1613102243  |
| O  | -5.5299914698 | -2.5970169388 | -0.6458589298 |
| C  | -4.5221400150 | -3.5789224049 | -0.8906367218 |
| O  | -4.0672395973 | -0.7890842310 | -0.3324100748 |
| C  | -4.3209822809 | 0.0146464622  | -1.4799209522 |
| C  | -4.6996033483 | 1.4313327830  | -1.0670715433 |
| C  | -4.7971170701 | 2.3016339630  | -2.3123318867 |
| C  | -3.4866771881 | 2.2490765958  | -3.0964263170 |
| O  | -3.2005928512 | 0.9211985122  | -3.4291084207 |
| C  | -3.0225498489 | 0.0742521549  | -2.2929991206 |
| O  | -2.4794084965 | 2.8108525644  | -2.2953230409 |
| C  | -1.5970169576 | 3.7655458801  | -2.8588611258 |
| C  | -1.3455001628 | 4.7581812847  | -1.7240475524 |
| C  | -0.3326974379 | 5.8025701848  | -2.1499140122 |
| C  | 0.9242671452  | 5.0972869885  | -2.6823041833 |
| O  | 0.6071478882  | 4.2056620569  | -3.7198987154 |
| C  | -0.2786352145 | 3.1529285666  | -3.3273426089 |
| O  | 1.5047086304  | 4.4037529642  | -1.6101098363 |
| C  | 2.8197880688  | 4.7459734502  | -1.2003867994 |
| C  | 2.7848082265  | 4.5680856456  | 0.3146415170  |
| C  | 4.1710211411  | 4.5335102217  | 0.9246770532  |
| C  | 5.0347213226  | 3.5608234825  | 0.1105822862  |
| O  | 5.1064564768  | 3.9758844570  | -1.2301795774 |
| C  | 3.8496235184  | 3.8647692494  | -1.9016366191 |
| O  | 4.4108089779  | 2.3149219117  | 0.2256397946  |
| C  | 5.1510863352  | 1.1273478125  | 0.4496315433  |

|   |               |               |               |
|---|---------------|---------------|---------------|
| C | 4.1920465865  | 0.2906268970  | 1.2957802156  |
| C | 4.7491689341  | -1.1009634980 | 1.5137133549  |
| C | 5.0762995703  | -1.7211555960 | 0.1400052108  |
| O | 5.9695341873  | -0.9015894273 | -0.5675519902 |
| C | 5.5139523446  | 0.4213032799  | -0.8494126405 |
| O | 3.8534352088  | -1.9039954758 | -0.5229475354 |
| C | 3.8228962398  | -2.8343903504 | -1.5990691986 |
| C | 3.7786238623  | -4.2625588202 | -1.0629241932 |
| C | 3.3376578323  | -5.2466392428 | -2.1346260929 |
| C | 2.0062794430  | -4.7979626617 | -2.7363760948 |
| O | 2.1827039235  | -3.5369773979 | -3.2979694412 |
| C | 2.5163978635  | -2.5211336242 | -2.3504966272 |
| O | 3.8032143895  | -1.8469097028 | 2.2431359088  |
| C | 4.2525522894  | -3.1042766919 | 2.7063368028  |
| C | 3.1111902198  | -3.6886100248 | 3.5182425497  |
| O | 1.9374310586  | -3.7409416685 | 2.7072761390  |
| O | 3.9515909112  | 0.9486809806  | 2.5288771232  |
| O | 4.0809081810  | 4.0767046387  | 2.2589339961  |
| C | 5.0687873454  | 4.6045847375  | 3.1389960917  |
| C | 5.4865229266  | 3.5446563771  | 4.1462738251  |
| O | 6.1304663410  | 2.4701798150  | 3.4900852040  |
| O | 2.0256044634  | 5.6071958787  | 0.9008939296  |
| O | 0.0229472878  | 6.6104459947  | -1.0491113199 |
| C | 0.2031782618  | 7.9868522834  | -1.3727889848 |
| C | 1.0091793731  | 8.6702676840  | -0.2806195010 |
| O | 2.3295365394  | 8.1721382484  | -0.2377584020 |
| O | -2.5516053388 | 5.3792680792  | -1.3360797168 |
| O | -5.1201998800 | 3.6194791942  | -1.9146876739 |
| C | -5.9454968275 | 4.3342009842  | -2.8388118012 |
| C | -5.5054091869 | 5.7865454668  | -2.9390390540 |
| O | -4.2113113166 | 5.8673597997  | -3.4981726392 |
| O | -5.9298785011 | 1.4258225838  | -0.3744253645 |
| O | -4.3907478460 | -1.0535131006 | 2.4765930668  |
| C | -5.3930267316 | -0.1083118736 | 2.7931615362  |
| C | -5.1962496110 | 0.3420370702  | 4.2268172862  |
| O | -3.8249366241 | 0.7364113766  | 4.3711473431  |
| O | -3.1202088462 | -3.4393894614 | 2.6077302850  |
| O | -1.5393755728 | -6.3852874438 | 1.7973543463  |
| C | -0.5654990457 | -6.8086184206 | 2.7324474313  |
| C | -0.7585153528 | -5.9975716452 | 4.0062739072  |
| O | -0.5964861427 | -4.6048558857 | 3.7470957871  |
| O | 1.0695072362  | -6.8608510789 | 0.2551064106  |
| O | 1.0345059172  | -4.7387334699 | -1.7213313225 |
| O | 3.2471351365  | -6.5149869953 | -1.5032052170 |
| C | 3.4474439699  | -7.6267756939 | -2.3832516883 |
| C | 2.9061049055  | -8.8977272802 | -1.7470617450 |
| O | 1.4987688242  | -8.8556117254 | -1.6588410458 |
| O | 5.0501124312  | -4.6345810533 | -0.5679090285 |
| C | 2.5284917982  | -1.2007672350 | -3.0956219013 |
| O | 1.2004112735  | -0.7608323082 | -3.2493950630 |
| C | -1.4040579078 | -5.1330720589 | -3.6388605166 |
| O | -2.5338131723 | -4.4280862847 | -4.0871196859 |
| C | -5.2106090812 | -4.6505625363 | -1.7299529895 |
| O | -5.1042368281 | -4.4074277960 | -3.1171171155 |
| C | -2.5232735269 | -1.2617217129 | -2.7874789915 |
| O | -3.5103933903 | -1.9267703420 | -3.5329775372 |
| C | -0.3863503893 | 2.2383880734  | -4.5294302887 |
| O | 0.8487377295  | 1.5906821172  | -4.7877675020 |

|   |               |                |               |
|---|---------------|----------------|---------------|
| C | 4.0901357413  | 4.2685719017   | -3.3454727169 |
| O | 4.3696673983  | 5.6381740618   | -3.4967411170 |
| C | 6.6509510325  | 1.0582133606   | -1.6305791878 |
| O | 6.8961965416  | 0.3481061666   | -2.8174659973 |
| C | 3.4070252297  | -5.0888894843  | 4.0077066130  |
| C | 1.0861579273  | 10.1645271295  | -0.5374622626 |
| C | -6.4618517408 | 6.5692330473   | -3.8223282523 |
| C | -6.1318981831 | 1.4792934518   | 4.5863461147  |
| C | -2.1235056183 | -6.1904830156  | 4.6378626133  |
| C | 6.4449203091  | 4.1293139815   | 5.1688755396  |
| C | 3.2847661443  | -10.1080748882 | -2.5813744099 |
| H | 5.6042635059  | -2.6712164536  | 0.2470394469  |
| H | 5.6934641953  | -1.0344194762  | 2.0782941881  |
| H | 3.2458110642  | 0.1922120334   | 0.7449146273  |
| H | 6.0551712105  | 1.3457852621   | 1.0376664881  |
| H | 6.0637842031  | 3.5269781882   | 0.4861157081  |
| H | 4.6151300686  | 5.5366229636   | 0.8798061075  |
| H | 2.3123451001  | 3.5975238442   | 0.5227286667  |
| H | 3.0346527652  | 5.7991028797   | -1.4236393451 |
| H | 1.6307210582  | 5.8199830767   | -3.1053662377 |
| H | -0.7670483010 | 6.4134655407   | -2.9535635507 |
| H | -0.9251974253 | 4.1984521232   | -0.8752249525 |
| H | -2.0877515135 | 4.2869895762   | -3.6935062236 |
| H | -3.5730468309 | 2.7942129407   | -4.0435082234 |
| H | -5.5914701711 | 1.8905173583   | -2.9506305053 |
| H | -3.9007525315 | 1.8211921481   | -0.4183437356 |
| H | -5.1136258290 | -0.4357536469  | -2.0894274352 |
| H | -6.0526446697 | -0.8761498607  | 0.2029963236  |
| H | -5.6345524895 | -2.6064946694  | 1.9355826927  |
| H | -2.7921342546 | -2.3439223770  | 0.8859370593  |
| H | -4.5658138198 | -4.8110660173  | 0.9168490819  |
| H | -3.4257449160 | -6.5613056027  | -0.0428298121 |
| H | -1.3102265504 | -7.7010727958  | 0.1987329691  |
| H | 0.1038582483  | -5.0398352512  | 0.4081504928  |
| H | 0.2968690389  | -6.6497943239  | -2.1310986278 |
| H | 1.6842517535  | -5.4616679084  | -3.5479774429 |
| H | 4.0941295622  | -5.2745473247  | -2.9310900785 |
| H | 3.0328603139  | -4.2724536100  | -0.2523834224 |
| H | 4.7016044503  | -2.7055491317  | -2.2472976433 |
| H | 1.7345523447  | -2.4644083803  | -1.5865824831 |
| H | -1.4397745231 | -4.1698652138  | -1.7326758125 |
| H | -3.7160695927 | -3.1373635035  | -1.4858981063 |
| H | -2.2389392371 | 0.4879572422   | -1.6430901366 |
| H | 0.1698390671  | 2.5896019788   | -2.4980508382 |
| H | 3.5039455696  | 2.8234836312   | -1.8745260552 |
| H | 4.6209977393  | 0.3839563380   | -1.4874582496 |
| H | 3.7212063303  | 1.8645541564   | 2.2880130251  |
| H | -2.4416002029 | -4.1191732050  | 2.4383470222  |
| H | 4.9876618870  | -5.5768534920  | -0.3639424929 |
| H | 1.1990068486  | 5.6652789251   | 0.3869335394  |
| H | -3.1857208304 | 4.6619921755   | -1.1656804759 |
| H | -6.1755005454 | 2.3567889521   | -0.2901466424 |
| H | 1.8661263344  | -6.5276050698  | -0.1996885376 |
| H | 5.1484344759  | -2.9939524889  | 3.3363154182  |
| H | 4.4940017540  | -3.7775272454  | 1.8708251172  |
| H | 2.9333717276  | -3.0189191029  | 4.3742637419  |
| H | 2.5745262658  | -5.4691227689  | 4.6063516532  |
| H | 4.3034599908  | -5.1035975845  | 4.6338762741  |

|   |               |                |               |
|---|---------------|----------------|---------------|
| H | 3.5561023916  | -5.7629108387  | 3.1590184437  |
| H | 1.9142691206  | -2.9090187991  | 2.2081729166  |
| H | -0.7811858670 | 8.4621229237   | -1.4864746690 |
| H | 0.7568637722  | 8.0901407165   | -2.3167874917 |
| H | 0.4932706199  | 8.4928142119   | 0.6779695799  |
| H | 1.5890096097  | 10.3571467055  | -1.4904412331 |
| H | 1.6702437929  | 10.6426837054  | 0.2516077445  |
| H | 0.0926595748  | 10.6211060202  | -0.5646635299 |
| H | 2.3299714198  | 7.3443271641   | 0.2687206207  |
| H | -6.9926726335 | 4.2645047150   | -2.5128244789 |
| H | -5.8653668586 | 3.8889991475   | -3.8387237265 |
| H | -5.5132322284 | 6.2174838761   | -1.9253155978 |
| H | -6.1353313459 | 7.6093696694   | -3.8841930864 |
| H | -7.4846353970 | 6.5465561926   | -3.4343162741 |
| H | -6.4630407531 | 6.1577462855   | -4.8368276609 |
| H | -3.5731501283 | 5.8787126948   | -2.7644534431 |
| H | -6.3942355388 | -0.5571397996  | 2.7129696643  |
| H | -5.3472712935 | 0.7435053431   | 2.1013057164  |
| H | -5.3818847185 | -0.5197110618  | 4.8866967040  |
| H | -5.9370896278 | 2.3497795090   | 3.9526606667  |
| H | -6.0078442572 | 1.7737150214   | 5.6342160779  |
| H | -7.1760663020 | 1.1804517151   | 4.4575435878  |
| H | -3.7758818802 | 1.3923500200   | 5.0745439186  |
| H | -0.5304707741 | -4.6003610787  | -4.0279718170 |
| H | -1.3907711547 | -6.1589786536  | -4.0365196610 |
| H | -3.3584762181 | -4.8035170319  | -3.7219209463 |
| H | -4.7604075056 | -5.6312465553  | -1.5663207084 |
| H | -6.2618933536 | -4.6971207884  | -1.4131678078 |
| H | -5.1714294391 | -3.4523504970  | -3.2635391148 |
| H | 0.4463593804  | -6.6465206872  | 2.3469795014  |
| H | -0.6723773960 | -7.8826922467  | 2.9507523379  |
| H | 0.0133752092  | -6.3392982889  | 4.7155192973  |
| H | -2.2866429912 | -7.2443358659  | 4.8796210254  |
| H | -2.9147695695 | -5.8664351817  | 3.9574529101  |
| H | -2.2011218203 | -5.6143946807  | 5.5640806596  |
| H | 0.2955695978  | -4.4474572926  | 3.3829994944  |
| H | -1.6144318605 | -1.0881977790  | -3.3802612294 |
| H | -2.2200992909 | -1.8365299375  | -1.8969875117 |
| H | -3.0802022715 | -2.7235519804  | -3.9013090056 |
| H | 4.6649462046  | 5.4928489783   | 3.6441729825  |
| H | 5.9631575772  | 4.9045690559   | 2.5766134378  |
| H | 4.5789370269  | 3.1895679645   | 4.6607924575  |
| H | 6.7375997564  | 3.3580048893   | 5.8843860397  |
| H | 5.9939497412  | 4.9624945478   | 5.7161263415  |
| H | 7.3527616138  | 4.4884151967   | 4.6737754535  |
| H | 5.4675181137  | 1.7864913293   | 3.3034232246  |
| H | -1.1262704588 | 1.4568677700   | -4.3438433250 |
| H | -0.7071789304 | 2.8219465398   | -5.4036991630 |
| H | 1.5040439208  | 2.2831461912   | -4.9325275536 |
| H | 4.5210215262  | -7.7175917891  | -2.5990108712 |
| H | 2.9133405516  | -7.4613123351  | -3.3278187596 |
| H | 3.3552812697  | -8.9917503783  | -0.7446976726 |
| H | 2.8595185037  | -10.0246985200 | -3.5865082690 |
| H | 2.8763965917  | -11.0092219453 | -2.1196995697 |
| H | 4.3695405916  | -10.2179976623 | -2.6664605076 |
| H | 1.2549774841  | -8.3390266042  | -0.8726459316 |
| H | 4.8928508408  | 3.6359369239   | -3.7520883191 |
| H | 3.1809406652  | 4.0681233485   | -3.9210051935 |

|   |               |               |               |
|---|---------------|---------------|---------------|
| H | 5.1894463984  | 5.8191306474  | -3.0229880469 |
| H | 3.1246269281  | -0.4853935157 | -2.5116731640 |
| H | 3.0293468992  | -1.3521761463 | -4.0630893712 |
| H | 1.1849364537  | 0.0116389172  | -3.8432654697 |
| H | 6.3868916547  | 2.0820818434  | -1.9072903063 |
| H | 7.5424293343  | 1.0981308923  | -0.9829586893 |
| H | 7.0960440181  | -0.5563236806 | -2.5486313373 |
| H | -2.5066561366 | -0.6174444882 | 4.1048322498  |
| H | -2.3212498835 | -2.1380897381 | 3.4650723341  |
| H | -2.0368990171 | -1.4691407387 | 6.3190141229  |
| H | -3.3385762237 | -2.3595966382 | 5.4860978824  |
| H | -1.7024437485 | -3.0592866790 | 5.5530584800  |
| H | 1.1729825952  | 4.1758920884  | 3.0561761796  |
| H | -0.0388537580 | 6.2634967117  | 2.6015311512  |
| H | -2.4812735394 | 1.9658438854  | 2.5332842590  |
| H | -0.5374016092 | -2.8028509437 | 1.7850413327  |
| H | -0.1090252880 | -2.2050977002 | -0.5809230550 |
| H | 0.4548404055  | 0.1194251516  | -1.1826918015 |
| H | 0.4652622671  | 1.8817839352  | 0.5813677116  |
| H | 1.2146398150  | 1.8430624959  | 3.2992546297  |
| H | -1.4137129511 | 1.2458580367  | 4.6811354965  |
| H | 0.0670730620  | 1.8690268912  | 5.3776024925  |
| H | -0.1058727568 | -0.5227611972 | 5.9692529530  |
| H | 1.2133415610  | -0.3269399676 | 4.8312281582  |
| H | -0.0213130960 | -2.2275257217 | 4.0870338447  |

255

2-HP-B-CD:cis-(1R,4R)-SRT\_4\_MD E(Ha)= -7253.9221000361

|    |             |             |             |
|----|-------------|-------------|-------------|
| C  | -0.03776190 | -1.18137841 | 3.60917759  |
| C  | -0.00038151 | -0.73157160 | 2.16797742  |
| C  | 0.37598813  | 0.57563461  | 1.82751822  |
| C  | 0.79794964  | 1.60187249  | 2.86272986  |
| C  | 0.66380126  | 1.11733683  | 4.32025638  |
| C  | 0.94106558  | -0.37260429 | 4.44648067  |
| C  | -0.28211650 | -1.66274215 | 1.16156858  |
| C  | -0.18968577 | -1.31575337 | -0.17873383 |
| C  | 0.19541663  | -0.02168629 | -0.52633667 |
| C  | 0.46538988  | 0.90844964  | 0.46888343  |
| C  | 0.11653469  | 2.94961969  | 2.72927805  |
| C  | 0.80170681  | 4.09770121  | 3.13149993  |
| C  | 0.18311710  | 5.34001289  | 3.12001800  |
| C  | -1.14501025 | 5.46686487  | 2.71928517  |
| C  | -1.84208031 | 4.32171121  | 2.32471551  |
| C  | -1.21169395 | 3.07703891  | 2.31495056  |
| Cl | -1.88741695 | 7.02132717  | 2.72296801  |
| Cl | -3.51023494 | 4.41762187  | 1.85999616  |
| N  | -1.45254927 | -1.10815567 | 4.12919133  |
| C  | -1.62828438 | -1.60171139 | 5.51134851  |
| O  | -5.60218936 | 2.28845099  | -0.12268752 |
| C  | -4.44301873 | 2.11226648  | -0.90848542 |
| C  | -4.49399775 | 3.00323174  | -2.14244924 |
| C  | -3.26444092 | 2.75063597  | -3.01567750 |
| O  | -3.22443707 | 1.39576092  | -3.36571325 |
| C  | -3.08281824 | 0.52799677  | -2.24562903 |
| C  | -4.29355580 | 0.65188946  | -1.31252322 |
| O  | -2.12598074 | 3.11096929  | -2.27277208 |
| C  | -1.28485536 | 4.14512999  | -2.76422638 |
| C  | -0.78676343 | 4.85951482  | -1.51265849 |
| C  | 0.29563310  | 5.85789248  | -1.87187919 |
| C  | 1.37017712  | 5.14904032  | -2.70661747 |
| O  | 0.82508537  | 4.58551165  | -3.86217474 |
| C  | -0.13854004 | 3.56830254  | -3.59540922 |
| O  | 1.93649745  | 4.15324109  | -1.88613204 |
| C  | 3.32412027  | 4.18074251  | -1.59729265 |
| C  | 3.41303255  | 3.81360704  | -0.11976411 |
| C  | 4.84209334  | 3.50068012  | 0.29408014  |
| C  | 5.41397008  | 2.47173654  | -0.68752423 |
| O  | 5.38718012  | 2.96705866  | -1.99472706 |
| C  | 4.06670252  | 3.19571908  | -2.49839524 |
| O  | 4.62419165  | 1.31514944  | -0.57805249 |
| C  | 5.21001382  | 0.07298404  | -0.22484155 |
| C  | 4.25376191  | -0.54530972 | 0.79055611  |
| C  | 4.65470149  | -1.97977876 | 1.08399066  |
| C  | 4.79987267  | -2.75114620 | -0.24192836 |
| O  | 5.72890216  | -2.12541703 | -1.08760240 |
| C  | 5.40281667  | -0.78975708 | -1.46629645 |
| O  | 3.51426065  | -2.81326315 | -0.80181689 |
| C  | 3.26928425  | -3.80475509 | -1.78871277 |
| C  | 3.01961464  | -5.16506142 | -1.14185047 |
| C  | 2.36161147  | -6.12861247 | -2.12174427 |
| C  | 1.09014526  | -5.50247942 | -2.69947803 |
| O  | 1.45815938  | -4.32970749 | -3.36791874 |
| C  | 1.98971583  | -3.33453477 | -2.48851483 |
| O  | 0.21181663  | -5.18810102 | -1.65517536 |

|   |             |             |             |
|---|-------------|-------------|-------------|
| C | -0.98741531 | -5.91948532 | -1.41988643 |
| C | -0.97729751 | -6.12696151 | 0.10088880  |
| C | -2.33629833 | -6.45397668 | 0.71396293  |
| C | -3.42755331 | -5.59157450 | 0.06413066  |
| O | -3.37672567 | -5.69316450 | -1.33364349 |
| C | -2.19613923 | -5.11352434 | -1.88425199 |
| O | -3.22552133 | -4.27753988 | 0.48432913  |
| C | -4.32723871 | -3.42831609 | 0.76797024  |
| C | -3.67964938 | -2.32853127 | 1.59484491  |
| C | -4.64409432 | -1.19451495 | 1.86549668  |
| C | -5.12580342 | -0.65914595 | 0.50652243  |
| O | -5.76493625 | -1.70333088 | -0.18637216 |
| C | -4.95688614 | -2.83661475 | -0.49855984 |
| O | -2.43332994 | -6.15389254 | 2.08557853  |
| C | -1.48265512 | -6.69449602 | 2.98372482  |
| C | -1.33822371 | -5.72231685 | 4.14818436  |
| O | -0.92087302 | -4.44095243 | 3.68444332  |
| O | -0.05498584 | -7.15494002 | 0.42733015  |
| O | 2.08878600  | -7.31770400 | -1.39996423 |
| C | 2.06649829  | -8.50213443 | -2.20504044 |
| C | 1.29097977  | -9.60085722 | -1.49390976 |
| O | -0.07536808 | -9.26663852 | -1.40080356 |
| O | 4.23848015  | -5.70484281 | -0.67570539 |
| O | 3.67326755  | -2.53945797 | 1.92877934  |
| C | 3.98301558  | -3.80848120 | 2.46876838  |
| C | 2.75658113  | -4.23438780 | 3.25610691  |
| O | 1.61758214  | -4.17824025 | 2.39496108  |
| O | 4.25893481  | 0.22578644  | 1.97220931  |
| O | 4.92397314  | 2.89853830  | 1.57084281  |
| C | 4.94158220  | 3.77727620  | 2.68932056  |
| C | 5.05982817  | 2.95255486  | 3.96478693  |
| O | 3.90780186  | 2.14447996  | 4.15934406  |
| O | 2.87753933  | 4.84957197  | 0.67857525  |
| O | 0.88971577  | 6.37702399  | -0.69823738 |
| C | 1.20749101  | 7.76494854  | -0.77712144 |
| C | 2.22407398  | 8.12583157  | 0.29514040  |
| O | 3.47100947  | 7.51999099  | 0.03917803  |
| O | -1.85524094 | 5.51718031  | -0.86240393 |
| O | -4.54775715 | 4.34265061  | -1.68591608 |
| C | -5.22187457 | 5.23194656  | -2.57824351 |
| C | -4.81120176 | 6.66871657  | -2.28972972 |
| O | -3.47611463 | 6.89981521  | -2.67062232 |
| O | -4.01283440 | -0.15170943 | -0.16894889 |
| O | -3.96387723 | -0.25424657 | 2.65738799  |
| C | -4.75538918 | 0.80498318  | 3.15822571  |
| C | -4.24109902 | 1.17383460  | 4.54283729  |
| O | -2.82366725 | 1.35723875  | 4.53445400  |
| O | -3.17880540 | -2.83923961 | 2.81809990  |
| C | -5.87490972 | -3.77614539 | -1.27605919 |
| O | -5.79075994 | -3.58011445 | -2.67325677 |
| C | -2.81715961 | -0.86760885 | -2.75725555 |
| O | -3.93766129 | -1.41082709 | -3.41100418 |
| C | -0.60190493 | 2.99997178  | -4.92054505 |
| O | -1.45804525 | 3.93030607  | -5.54772344 |
| C | 4.24176368  | 3.72293428  | -3.91169413 |
| O | 4.89650151  | 4.96638482  | -3.93491590 |
| C | 6.56012198  | -0.31093745 | -2.32736324 |
| O | 7.76581875  | -0.27141613 | -1.60367927 |

|   |             |              |             |
|---|-------------|--------------|-------------|
| C | 2.13492564  | -2.08009826  | -3.32495905 |
| O | 0.88000066  | -1.63667931  | -3.78403366 |
| C | -2.38744967 | -5.06469930  | -3.38923678 |
| O | -3.34291662 | -4.11355290  | -3.78306295 |
| C | -2.62613777 | -5.53339790  | 4.92696471  |
| C | 2.87467206  | -5.63921125  | 3.80357799  |
| C | 6.33544226  | 2.12609230   | 4.02690248  |
| C | 2.43855074  | 9.62844078   | 0.33583590  |
| C | -5.68781304 | 7.63214591   | -3.07127751 |
| C | 1.40359655  | -10.90596051 | -2.26184385 |
| C | -4.95043840 | 2.38697861   | 5.11426453  |
| H | -4.41541242 | -5.95633997  | 0.36933520  |
| H | -2.57019624 | -7.51110174  | 0.51229127  |
| H | -0.64701518 | -5.17548995  | 0.54306479  |
| H | -0.95556375 | -6.89993953  | -1.91590766 |
| H | 0.61182371  | -6.15512775  | -3.43990194 |
| H | 3.05959005  | -6.33749884  | -2.94453096 |
| H | 2.32770194  | -4.99895082  | -0.30145653 |
| H | 4.11256597  | -3.87609181  | -2.49100323 |
| H | 5.20273644  | -3.75471002  | -0.08647846 |
| H | 5.63440843  | -1.98624812  | 1.58725403  |
| H | 3.24636553  | -0.56200752  | 0.34838518  |
| H | 6.18797601  | 0.22803500   | 0.25053130  |
| H | 6.46238716  | 2.25351136   | -0.45681415 |
| H | 5.45950950  | 4.41002264   | 0.26096772  |
| H | 2.83196994  | 2.89207730   | 0.02581102  |
| H | 3.73283534  | 5.18945950   | -1.74636747 |
| H | 2.13892818  | 5.85452730   | -3.04148509 |
| H | -0.14898307 | 6.66495134   | -2.46926367 |
| H | -0.35289542 | 4.10606949   | -0.83895707 |
| H | -1.85858732 | 4.85476076   | -3.37335252 |
| H | -3.29636872 | 3.30802161   | -3.95790728 |
| H | -5.39748083 | 2.75864240   | -2.71962500 |
| H | -3.54718327 | 2.38394599   | -0.32975072 |
| H | -5.19662271 | 0.29180824   | -1.82053190 |
| H | -5.89367949 | 0.11151491   | 0.62347411  |
| H | -5.53175553 | -1.57117977  | 2.39984796  |
| H | -2.85635083 | -1.91622107  | 0.99645460  |
| H | -5.07453103 | -3.96393830  | 1.37386763  |
| H | -4.13263966 | -2.53916471  | -1.15716252 |
| H | -2.19521860 | 0.82266828   | -1.66915104 |
| H | 0.33421550  | 2.75649490   | -3.02483769 |
| H | 3.50833427  | 2.25065916   | -2.52165231 |
| H | 4.47592809  | -0.77253458  | -2.05409281 |
| H | 1.25883200  | -3.12639741  | -1.70116066 |
| H | -2.08166261 | -4.08511643  | -1.51920846 |
| H | 0.76931843  | -6.98490123  | -0.06563554 |
| H | -2.59134496 | 4.88331410   | -0.83005918 |
| H | -2.63991663 | -3.63228454  | 2.63643962  |
| H | 4.03791671  | -6.60399687  | -0.38638430 |
| H | 4.33532522  | 1.15979378   | 1.69239962  |
| H | 2.03280470  | 5.12740436   | 0.27100797  |
| H | -5.72322379 | 3.24446993   | -0.05611640 |
| H | -0.51223485 | -6.82885579  | 2.49712612  |
| H | -1.81232180 | -7.67750803  | 3.35414770  |
| H | -0.57420111 | -6.14573929  | 4.82123882  |
| H | -3.40992817 | -5.12437764  | 4.28478941  |
| H | -2.47137709 | -4.84983031  | 5.76618502  |



|   |             |              |             |
|---|-------------|--------------|-------------|
| H | -2.97139505 | -6.49040619  | 5.32795063  |
| H | -0.06877002 | -4.51885296  | 3.21570612  |
| H | 4.86318637  | -3.75455280  | 3.12709294  |
| H | 4.17930385  | -4.54538162  | 1.67604345  |
| H | 2.61926529  | -3.51941977  | 4.08273123  |
| H | 1.98022513  | -5.90615273  | 4.37344667  |
| H | 3.73557541  | -5.72391935  | 4.47273454  |
| H | 2.98904648  | -6.35977351  | 2.98817664  |
| H | 1.73720724  | -3.38021515  | 1.85498735  |
| H | 4.02480839  | 4.37452256   | 2.70849864  |
| H | 5.79979482  | 4.46141018   | 2.60875152  |
| H | 5.05934437  | 3.67622260   | 4.79058038  |
| H | 7.22186003  | 2.75889763   | 3.92375964  |
| H | 6.34887679  | 1.38248580   | 3.22408624  |
| H | 6.39544477  | 1.60313040   | 4.98494140  |
| H | 4.04882008  | 1.30571805   | 3.69857675  |
| H | 0.28554341  | 8.35057283   | -0.65602900 |
| H | 1.64956886  | 8.00051209   | -1.75557262 |
| H | 1.81917019  | 7.79183509   | 1.26600035  |
| H | 2.82139831  | 9.98228955   | -0.62673654 |
| H | 3.18027521  | 9.87124823   | 1.09989650  |
| H | 1.51139723  | 10.16224957  | 0.56327975  |
| H | 3.42042609  | 6.59495970   | 0.32701144  |
| H | -1.94878090 | -0.81016201  | -3.42972397 |
| H | -2.51939326 | -1.47293535  | -1.88731231 |
| H | -3.65010473 | -2.27590473  | -3.75429103 |
| H | 0.29225958  | 2.79372112   | -5.52560682 |
| H | -1.11552800 | 2.04776872   | -4.72300986 |
| H | -1.64369650 | 3.61982576   | -6.43798600 |
| H | -6.30797114 | 5.10139247   | -2.46260480 |
| H | -4.95319338 | 5.00584262   | -3.61865450 |
| H | -4.94781383 | 6.84832710   | -1.21001102 |
| H | -6.74306731 | 7.53013302   | -2.80160630 |
| H | -5.58027577 | 7.45500783   | -4.14627645 |
| H | -5.37160995 | 8.65758368   | -2.86879527 |
| H | -2.88577323 | 6.55383710   | -1.97986212 |
| H | 4.77844635  | 2.96508637   | -4.50227091 |
| H | 3.25540385  | 3.86716309   | -4.36334871 |
| H | 5.76404697  | 4.83390067   | -3.53635896 |
| H | 3.10096483  | -8.81266823  | -2.40698386 |
| H | 1.56964709  | -8.29859420  | -3.16248229 |
| H | 1.72880214  | -9.73179314  | -0.49057434 |
| H | 0.98492696  | -10.79303130 | -3.26693380 |
| H | 0.83174133  | -11.68061421 | -1.74705366 |
| H | 2.44261741  | -11.23657827 | -2.34837519 |
| H | -0.19410996 | -8.67705664  | -0.63816001 |
| H | 6.63330406  | -0.96495353  | -3.20884551 |
| H | 6.35644950  | 0.70631329   | -2.67490549 |
| H | 7.93646126  | -1.17256231  | -1.30676406 |
| H | -5.80873981 | 0.50053210   | 3.24776546  |
| H | -4.71820235 | 1.66461739   | 2.47388145  |
| H | -4.39525032 | 0.30913211   | 5.19968820  |
| H | -6.02660533 | 2.20872339   | 5.19905164  |
| H | -4.80549148 | 3.26298493   | 4.47186448  |
| H | -4.56204410 | 2.61898571   | 6.10868364  |
| H | -2.61450969 | 2.17658537   | 4.06560654  |
| H | 2.54494820  | -1.28526868  | -2.69839209 |
| H | 2.83327958  | -2.26633505  | -4.15618828 |

|   |             |             |             |
|---|-------------|-------------|-------------|
| H | 0.49778558  | -2.37077292 | -4.27881341 |
| H | -5.61315034 | -4.82146693 | -1.10715152 |
| H | -6.89953588 | -3.61483918 | -0.91427423 |
| H | -5.68017522 | -2.63221371 | -2.84305866 |
| H | -1.43972214 | -4.77185237 | -3.85380616 |
| H | -2.64932740 | -6.07052994 | -3.75051267 |
| H | -4.20986307 | -4.28739022 | -3.36487881 |
| H | -1.85163206 | -0.15017730 | 4.06634356  |
| H | -2.06873797 | -1.70490366 | 3.52540590  |
| H | -1.17777468 | -2.59269218 | 5.58173362  |
| H | -1.17383061 | -0.91163441 | 6.22136047  |
| H | -2.69812324 | -1.67642212 | 5.70966314  |
| H | 1.83188849  | 4.00910209  | 3.46200609  |
| H | 0.72392159  | 6.22933115  | 3.42619943  |
| H | -1.76321247 | 2.20854994  | 1.96190253  |
| H | -0.57546913 | -2.67184943 | 1.44355399  |
| H | -0.40726083 | -2.04449226 | -0.95256146 |
| H | 0.28992619  | 0.24854827  | -1.57452137 |
| H | 0.76424952  | 1.91623223  | 0.19221808  |
| H | 1.87034675  | 1.76952802  | 2.69600296  |
| H | -0.33776624 | 1.34698901  | 4.70532492  |
| H | 1.37046903  | 1.68470414  | 4.93252746  |
| H | 0.92881270  | -0.68999330 | 5.49430854  |
| H | 1.94189393  | -0.60247680 | 4.06002448  |
| H | 0.20835073  | -2.24590232 | 3.66170164  |

2-HP-B-CD:cis-(1R,4R)-SRT\_5\_MD E(Ha)= -7253.9175047023

|    |             |             |             |
|----|-------------|-------------|-------------|
| C  | 0.50473260  | 1.35455705  | 3.72866884  |
| C  | 0.27053572  | 0.95411384  | 2.29094966  |
| C  | -0.18535340 | -0.32553585 | 1.94825454  |
| C  | -0.49764778 | -1.38797170 | 2.98853460  |
| C  | -0.05029455 | -0.99757565 | 4.40770019  |
| C  | -0.29517803 | 0.47845827  | 4.68072412  |
| C  | 0.46138728  | 1.91611273  | 1.29150077  |
| C  | 0.18502360  | 1.63027410  | -0.03681245 |
| C  | -0.29173717 | 0.36618154  | -0.38503432 |
| C  | -0.45963151 | -0.59730572 | 0.60079463  |
| C  | 0.06111680  | -2.75157133 | 2.64108835  |
| C  | -0.71925095 | -3.90342610 | 2.74754960  |
| C  | -0.16707639 | -5.16310096 | 2.53506560  |
| C  | 1.18144403  | -5.29495243 | 2.21366401  |
| C  | 1.96664276  | -4.14354268 | 2.09126562  |
| C  | 1.40708249  | -2.88625106 | 2.28687329  |
| Cl | 1.85286647  | -6.86430336 | 1.94826178  |
| Cl | 3.65862317  | -4.25660423 | 1.71282119  |
| N  | 1.98606461  | 1.34715689  | 4.01934996  |
| C  | 2.35563189  | 1.87268003  | 5.35141912  |
| C  | 0.90839493  | 6.01225642  | -0.20338749 |
| C  | 2.30890674  | 6.34222413  | 0.30933701  |
| C  | 3.36009595  | 5.53617105  | -0.46574453 |
| O  | 3.16304088  | 5.67537892  | -1.84432118 |
| C  | 1.97294355  | 5.03667230  | -2.29062423 |
| C  | 0.78358584  | 5.80176808  | -1.71935585 |
| O  | 3.21930858  | 4.20508954  | -0.06333504 |
| C  | 4.36764440  | 3.41091843  | 0.18532293  |
| C  | 3.84461971  | 2.38558000  | 1.17445898  |
| C  | 4.86714192  | 1.30497191  | 1.42574495  |
| C  | 5.20204050  | 0.68330690  | 0.06203018  |
| O  | 5.77137749  | 1.66112415  | -0.75881757 |
| C  | 4.91109924  | 2.75356261  | -1.08876089 |
| O  | 3.99914539  | 0.15228261  | -0.44984297 |
| C  | 4.12496987  | -0.66963867 | -1.59737684 |
| C  | 4.38998321  | -2.11105237 | -1.20055313 |
| C  | 4.36671053  | -3.01757243 | -2.42445741 |
| C  | 3.05506278  | -2.86438016 | -3.21527234 |
| O  | 2.87045606  | -1.49065511 | -3.49785832 |
| C  | 2.78356497  | -0.65266653 | -2.34080270 |
| O  | 2.00064617  | -3.40722264 | -2.48890652 |
| C  | 0.99323585  | -4.15321453 | -3.17064584 |
| C  | 0.92628886  | -5.51619546 | -2.47754918 |
| C  | -0.38709538 | -6.27954766 | -2.67346254 |
| C  | -1.64042742 | -5.39086277 | -2.74016830 |
| O  | -1.36444482 | -4.30357099 | -3.58505376 |
| C  | -0.34632791 | -3.42435914 | -3.11469356 |
| O  | -2.05014177 | -4.99517097 | -1.46758873 |
| C  | -3.43873608 | -4.69941765 | -1.26556276 |
| C  | -3.52079810 | -4.42356608 | 0.24760906  |
| C  | -4.81510390 | -3.73876562 | 0.66643689  |
| C  | -5.24932114 | -2.63261515 | -0.28960220 |
| O  | -5.23505917 | -3.10210207 | -1.60602704 |
| C  | -3.94847769 | -3.50449460 | -2.08740309 |
| O  | -4.39433738 | -1.52935281 | -0.14669088 |
| C  | -4.98928318 | -0.29214640 | 0.21909734  |

|   |             |             |             |
|---|-------------|-------------|-------------|
| C | -3.94466829 | 0.39832362  | 1.08292180  |
| C | -4.39422053 | 1.81059836  | 1.40797451  |
| C | -4.71598745 | 2.53692795  | 0.08612733  |
| O | -5.72140647 | 1.85011619  | -0.61799085 |
| C | -5.37933004 | 0.52391847  | -1.00791760 |
| O | -3.51510616 | 2.61320881  | -0.63064893 |
| C | -3.41393579 | 3.59122727  | -1.66030338 |
| C | -3.13884208 | 4.96544722  | -1.05574824 |
| C | -2.61134188 | 5.93971298  | -2.09874059 |
| C | -1.39310365 | 5.33270284  | -2.79834243 |
| O | -1.80419472 | 4.15895302  | -3.42767242 |
| C | -2.21196532 | 3.14553542  | -2.51160829 |
| O | -3.37757009 | 2.44753651  | 2.14598005  |
| C | -3.73654457 | 3.69316392  | 2.71278732  |
| C | -2.51320838 | 4.17873093  | 3.46899245  |
| O | -1.40254989 | 4.21587112  | 2.57411711  |
| O | -3.74849085 | -0.36728758 | 2.26228660  |
| O | -4.66417986 | -3.18551568 | 1.96245971  |
| C | -5.72972174 | -3.49826539 | 2.85557012  |
| C | -5.73934827 | -2.51786639 | 4.01903637  |
| O | -6.07738662 | -1.21842327 | 3.58830931  |
| O | -3.44809654 | -5.59363565 | 1.00786947  |
| O | -0.41238300 | -7.22873600 | -1.63414651 |
| C | -1.52917620 | -8.09190023 | -1.54789527 |
| C | -1.56218912 | -8.56370120 | -0.09746846 |
| O | -1.39015951 | -7.42203204 | 0.73578545  |
| O | 1.97780080  | -6.31128921 | -2.95408819 |
| O | 4.60760402  | -4.30578701 | -1.91046452 |
| C | 4.93389391  | -5.32189397 | -2.84363100 |
| C | 5.11919377  | -6.59343678 | -2.02585349 |
| O | 3.98916117  | -6.79077658 | -1.17895367 |
| O | 5.63288961  | -2.22688614 | -0.54604561 |
| O | 4.32003419  | 0.40667951  | 2.36244188  |
| C | 5.20401468  | -0.59767983 | 2.81401304  |
| C | 4.84779579  | -0.92970001 | 4.25528191  |
| O | 3.44471834  | -1.16832300 | 4.38879070  |
| O | 3.47412231  | 3.01743782  | 2.39282988  |
| O | 2.48679473  | 5.98103128  | 1.66506643  |
| C | 1.71365487  | 6.67952388  | 2.62489513  |
| C | 1.71822079  | 5.88033381  | 3.92084692  |
| O | 1.19070037  | 4.57561730  | 3.71159708  |
| O | 0.00502680  | 7.02626089  | 0.21194331  |
| O | -0.41321783 | 5.03949480  | -1.83876507 |
| O | -2.30005778 | 7.13876600  | -1.40639822 |
| C | -2.37156158 | 8.31832003  | -2.21349673 |
| C | -1.58199485 | 9.44365299  | -1.56126041 |
| O | -0.20118151 | 9.16539089  | -1.57918285 |
| O | -4.31761593 | 5.47619954  | -0.46540956 |
| C | -2.45340385 | 1.88179459  | -3.30826114 |
| O | -1.21895343 | 1.30439190  | -3.65050558 |
| C | 2.02180033  | 4.95854101  | -3.80845687 |
| O | 3.11200067  | 4.20956717  | -4.27216356 |
| C | 5.70034567  | 3.70260833  | -1.97022420 |
| O | 6.54217757  | 4.50026421  | -1.15763147 |
| C | 2.33285851  | 0.71244352  | -2.81761469 |
| O | 3.25377348  | 1.33025251  | -3.69590199 |
| C | -0.43075910 | -2.19644481 | -4.00108305 |
| O | -1.57517070 | -1.41664793 | -3.71821974 |

|   |             |             |             |
|---|-------------|-------------|-------------|
| C | -4.20757660 | -3.72310345 | -3.57566448 |
| O | -4.13439386 | -2.49351855 | -4.28272182 |
| C | -6.60797820 | -0.01454061 | -1.72256456 |
| O | -7.70762253 | -0.15659408 | -0.85892539 |
| C | -2.69784913 | 5.56161748  | 4.05342510  |
| C | -2.86309522 | -9.24159923 | 0.26787903  |
| C | 5.26800871  | -7.81874630 | -2.90056567 |
| C | 5.65877304  | -2.09118853 | 4.79753720  |
| C | 3.10048587  | 5.73064724  | 4.52864666  |
| C | -6.76448987 | -2.94384268 | 5.05555389  |
| C | -1.80509115 | 10.74517790 | -2.31131281 |
| H | -5.13199868 | 3.53155869  | 0.26103175  |
| H | -5.32271602 | 1.77295063  | 2.00055499  |
| H | -3.00194947 | 0.46159986  | 0.52465691  |
| H | -5.88359462 | -0.47123584 | 0.83216700  |
| H | -6.28538234 | -2.33647020 | -0.08856012 |
| H | -5.59445577 | -4.51132827 | 0.67037441  |
| H | -2.68716089 | -3.73516255 | 0.47059858  |
| H | -4.04337412 | -5.59223177 | -1.49329212 |
| H | -2.45166459 | -5.93445098 | -3.24369526 |
| H | -0.31981823 | -6.77921963 | -3.65206013 |
| H | 1.02291372  | -5.31441746 | -1.40078440 |
| H | 1.28147587  | -4.31568038 | -4.21931746 |
| H | 3.13128348  | -3.34293947 | -4.19901912 |
| H | 5.18604027  | -2.71893411 | -3.09854889 |
| H | 3.57528458  | -2.42817012 | -0.53097136 |
| H | 4.91712508  | -0.28751788 | -2.25453023 |
| H | 5.95977251  | -0.10034834 | 0.14485753  |
| H | 5.79819710  | 1.74246136  | 1.81969419  |
| H | 2.96383983  | 1.90680629  | 0.72940599  |
| H | 5.15735086  | 4.01212583  | 0.65303543  |
| H | 4.37204910  | 5.89975351  | -0.25934560 |
| H | 2.50747647  | 7.41350431  | 0.15524401  |
| H | 0.62622407  | 5.05547268  | 0.26004221  |
| H | 0.68022890  | 6.77934486  | -2.21137954 |
| H | -0.99602290 | 5.99096458  | -3.58053100 |
| H | -3.39348746 | 6.12918906  | -2.84710209 |
| H | -2.35903751 | 4.82585086  | -0.29133246 |
| H | -4.33779915 | 3.62633038  | -2.25591998 |
| H | -1.39780968 | 2.93708072  | -1.81254594 |
| H | 1.93582972  | 4.01226199  | -1.89700859 |
| H | 4.06791437  | 2.38226531  | -1.67912724 |
| H | 2.00790739  | -1.03597495 | -1.66203233 |
| H | -0.55341168 | -3.13162670 | -2.07637474 |
| H | -3.23413271 | -2.67799218 | -1.97612656 |
| H | -4.52950500 | 0.53343319  | -1.70245635 |
| H | -3.79279123 | -1.30012302 | 1.97623878  |
| H | 2.98723940  | 3.83343470  | 2.16879138  |
| H | -4.11180725 | 6.38543867  | -0.21351277 |
| H | -2.66405180 | -6.12989319 | 0.78016704  |
| H | 2.54128222  | -6.61652923 | -2.21782863 |
| H | 5.82359208  | -3.17383871 | -0.52852191 |
| H | -0.85913903 | 6.84048624  | -0.20045261 |
| H | -4.59124286 | 3.58205520  | 3.39724999  |
| H | -3.99890335 | 4.42530555  | 1.93468691  |
| H | -2.30719686 | 3.45647729  | 4.27538685  |
| H | -3.53084129 | 5.57738876  | 4.76190339  |
| H | -2.89427929 | 6.28951101  | 3.26059400  |

|   |             |              |             |
|---|-------------|--------------|-------------|
| H | -1.79554760 | 5.87267574   | 4.58745717  |
| H | -1.46674294 | 3.41281682   | 2.03331339  |
| H | -1.43495476 | -8.93678725  | -2.24415993 |
| H | -2.46433684 | -7.55942415  | -1.76525861 |
| H | -0.71654759 | -9.24837579  | 0.06602442  |
| H | -3.04602144 | -10.10706984 | -0.37593927 |
| H | -3.69637409 | -8.53890102  | 0.16670136  |
| H | -2.83364748 | -9.58622306  | 1.30416680  |
| H | -0.67915534 | -6.92394073  | 0.30134344  |
| H | 5.85709442  | -5.07182415  | -3.38735216 |
| H | 4.11319483  | -5.46378386  | -3.55678195 |
| H | 6.01369508  | -6.47290704  | -1.39510525 |
| H | 6.14061177  | -7.72585290  | -3.55350975 |
| H | 4.37805796  | -7.95446316  | -3.52294531 |
| H | 5.39434180  | -8.70918301  | -2.28076509 |
| H | 3.90161678  | -5.98642813  | -0.64891375 |
| H | 6.24689569  | -0.24827985  | 2.78174604  |
| H | 5.13353913  | -1.48747412  | 2.17057906  |
| H | 5.02837093  | -0.03435130  | 4.86212255  |
| H | 6.73014483  | -1.87209978  | 4.76393592  |
| H | 5.48391795  | -2.99841138  | 4.20720405  |
| H | 5.38311141  | -2.29599207  | 5.83471700  |
| H | 3.24783814  | -2.03033494  | 4.00142527  |
| H | 1.05887035  | 4.55648282   | -4.16106346 |
| H | 2.13802344  | 5.97000466   | -4.21515154 |
| H | 2.97568554  | 3.26703797   | -4.08612934 |
| H | 6.27881752  | 3.08110090   | -2.66839388 |
| H | 4.99553216  | 4.30916727   | -2.55145229 |
| H | 7.01482894  | 5.10750606   | -1.73312634 |
| H | 0.68325342  | 6.80116343   | 2.27488967  |
| H | 2.12936077  | 7.68389013   | 2.80216011  |
| H | 1.08062497  | 6.43663411   | 4.62864027  |
| H | 3.04469681  | 5.18034059   | 5.47211278  |
| H | 3.53222017  | 6.71371825   | 4.73634458  |
| H | 3.77069447  | 5.19478070   | 3.85210379  |
| H | 0.30564534  | 4.63842466   | 3.30641121  |
| H | 1.33787833  | 0.63688348   | -3.27674458 |
| H | 2.24318266  | 1.36188539   | -1.94438487 |
| H | 3.35873848  | 0.75163590   | -4.46003226 |
| H | -5.60942969 | -4.53094208  | 3.21095395  |
| H | -6.69608478 | -3.41331475  | 2.33851357  |
| H | -4.73587928 | -2.52702119  | 4.47832087  |
| H | -7.76621939 | -2.95140158  | 4.61407133  |
| H | -6.76933809 | -2.22974458  | 5.88189552  |
| H | -6.54855060 | -3.94005195  | 5.45222444  |
| H | -5.27997079 | -0.79536851  | 3.23148419  |
| H | 0.44678353  | -1.56793083  | -3.83082409 |
| H | -0.41461165 | -2.51917479  | -5.05193565 |
| H | -2.38610055 | -1.85577622  | -4.04291180 |
| H | -3.42701801 | 8.59718460   | -2.34109963 |
| H | -1.93876144 | 8.12666852   | -3.20395091 |
| H | -1.94457377 | 9.55633982   | -0.52577518 |
| H | -1.46815144 | 10.64876077  | -3.34833640 |
| H | -1.22016755 | 11.53915537  | -1.84260025 |
| H | -2.85902974 | 11.03788110  | -2.30949148 |
| H | 0.00021585  | 8.55493676   | -0.85044797 |
| H | -3.46885089 | -4.36206306  | -4.04704648 |
| H | -5.19892191 | -4.18119508  | -3.68605629 |

|   |             |             |             |
|---|-------------|-------------|-------------|
| H | -4.82356825 | -1.91819871 | -3.93179448 |
| H | -3.04424062 | 1.20368949  | -2.67966326 |
| H | -3.05187417 | 2.13523146  | -4.19855705 |
| H | -1.37792672 | 0.35910984  | -3.83190042 |
| H | -6.83310457 | 0.65680214  | -2.56492214 |
| H | -6.39047639 | -1.00830459 | -2.12552242 |
| H | -7.88856272 | 0.71731377  | -0.49384235 |
| H | 2.40315781  | 0.40618241  | 3.90362114  |
| H | 2.47453615  | 1.96107320  | 3.31782049  |
| H | 3.43847016  | 2.00102997  | 5.37312448  |
| H | 1.87424169  | 2.84324193  | 5.47851423  |
| H | 2.05473310  | 1.17513589  | 6.13232210  |
| H | -1.77800035 | -3.82965011 | 2.98381092  |
| H | -0.78269351 | -6.05410309 | 2.60415834  |
| H | 2.02426582  | -2.00247380 | 2.14174146  |
| H | 0.82789994  | 2.90098364  | 1.57189609  |
| H | 0.32382551  | 2.39490315  | -0.79465983 |
| H | -0.55552955 | 0.15596179  | -1.41843993 |
| H | -0.83597385 | -1.58124243 | 0.33057758  |
| H | -1.59310337 | -1.46383541 | 3.00481132  |
| H | 1.01216714  | -1.23136420 | 4.54662158  |
| H | -0.58887076 | -1.61669358 | 5.13193534  |
| H | -0.08422839 | 0.72955283  | 5.72513452  |
| H | -1.35208520 | 0.71664089  | 4.50799216  |
| H | 0.22147450  | 2.40266111  | 3.85761095  |

2-HP-B-CD:cis-(1R,4R)-SRT\_6\_MD E(Ha)= -7253.9181080813

|    |             |             |             |
|----|-------------|-------------|-------------|
| C  | -0.27020633 | -1.22856821 | 3.49532835  |
| C  | -0.13478491 | -0.70884812 | 2.08325414  |
| C  | 0.16619253  | 0.63829724  | 1.83195269  |
| C  | 0.50615124  | 1.61769719  | 2.94348884  |
| C  | 0.20495961  | 1.07374161  | 4.35016324  |
| C  | 0.56782550  | -0.40051682 | 4.45678687  |
| C  | -0.26711602 | -1.60328269 | 1.01523295  |
| C  | -0.11971612 | -1.18341791 | -0.30071750 |
| C  | 0.15466257  | 0.15994937  | -0.55258201 |
| C  | 0.28942956  | 1.05460946  | 0.50100384  |
| C  | -0.10913032 | 2.99116705  | 2.78425066  |
| C  | 0.64583759  | 4.13088193  | 3.06094054  |
| C  | 0.06815851  | 5.39407160  | 3.02062257  |
| C  | -1.28027679 | 5.54207411  | 2.71243602  |
| C  | -2.04645953 | 4.40780145  | 2.42089862  |
| C  | -1.45530623 | 3.14659385  | 2.44319239  |
| Cl | -1.96753383 | 7.12939906  | 2.67495296  |
| Cl | -3.72787943 | 4.54291565  | 2.04099216  |
| N  | -1.73201314 | -1.25928344 | 3.88170195  |
| C  | -2.00344898 | -1.73384656 | 5.25566706  |
| C  | -0.89934334 | -6.46345421 | 0.24498318  |
| C  | -2.36620402 | -6.54221711 | 0.63207546  |
| C  | -3.19431653 | -5.64832450 | -0.31407712 |
| O  | -2.87798439 | -5.89585806 | -1.65122904 |
| C  | -1.53874503 | -5.51495338 | -1.99899907 |
| C  | -0.62469230 | -6.47987372 | -1.25850108 |
| O  | -2.95501488 | -4.30839417 | 0.01706356  |
| C  | -4.04696675 | -3.40668237 | 0.08676902  |
| C  | -3.59577258 | -2.37379264 | 1.10697721  |
| C  | -4.64933138 | -1.30593103 | 1.30483541  |
| C  | -4.99050059 | -0.67606678 | -0.05718730 |
| O  | -5.34061427 | -1.68874060 | -0.96972122 |
| C  | -4.33046809 | -2.66469150 | -1.22397845 |
| O  | -3.89886423 | 0.08475287  | -0.49578398 |
| C  | -4.23729591 | 1.03598885  | -1.50092873 |
| C  | -4.57240391 | 2.38294603  | -0.87820184 |
| C  | -4.79400116 | 3.41139868  | -1.97886657 |
| C  | -3.53720275 | 3.50595653  | -2.84546375 |
| O  | -3.32522357 | 2.22312328  | -3.40593747 |
| C  | -3.03853542 | 1.20667109  | -2.44139194 |
| O  | -2.46253513 | 3.90787410  | -2.05793163 |
| C  | -1.52576476 | 4.84121524  | -2.57623225 |
| C  | -0.92738481 | 5.51893425  | -1.34695176 |
| C  | 0.27174084  | 6.37367053  | -1.72441016 |
| C  | 1.28326165  | 5.52249805  | -2.48654941 |
| O  | 0.66981711  | 5.03668626  | -3.64369100 |
| C  | -0.43237213 | 4.15494722  | -3.41237620 |
| O  | 1.68560182  | 4.47702745  | -1.63695014 |
| C  | 3.06642643  | 4.30975737  | -1.35746852 |
| C  | 3.12284119  | 3.95508922  | 0.12352789  |
| C  | 4.52426171  | 3.54920813  | 0.53020740  |
| C  | 5.04299866  | 2.48507785  | -0.44871750 |
| O  | 5.00840520  | 2.95713789  | -1.76595661 |
| C  | 3.68123962  | 3.22280946  | -2.23348885 |
| O  | 4.23133166  | 1.35080021  | -0.29925324 |
| C  | 4.82931629  | 0.10138381  | 0.00951507  |



|   |             |             |             |
|---|-------------|-------------|-------------|
| C | 3.85053545  | -0.57119719 | 0.96756127  |
| C | 4.32773499  | -1.97234215 | 1.30424743  |
| C | 4.62000082  | -2.75882976 | 0.00933457  |
| O | 5.50413227  | -2.04300358 | -0.81310247 |
| C | 5.04894643  | -0.75691290 | -1.22824694 |
| O | 3.38641223  | -3.01685380 | -0.60482604 |
| C | 3.34513915  | -4.07875431 | -1.55590700 |
| C | 3.41759416  | -5.43434725 | -0.84933254 |
| C | 2.96852763  | -6.58228611 | -1.74513147 |
| C | 1.59190056  | -6.26411925 | -2.32248769 |
| O | 1.68538997  | -5.07106769 | -3.05497426 |
| C | 1.97261322  | -3.94049087 | -2.23333114 |
| O | 3.34281182  | -2.58756613 | 2.10496133  |
| C | 3.73125370  | -3.79829587 | 2.72454424  |
| C | 2.49121979  | -4.31587585 | 3.43345940  |
| O | 1.42110238  | -4.39975713 | 2.49016916  |
| O | 3.72814011  | 0.20282900  | 2.14943709  |
| O | 4.50897786  | 3.01463783  | 1.83974049  |
| C | 5.67207536  | 3.32986868  | 2.60373775  |
| C | 5.83937717  | 2.32901638  | 3.73749793  |
| O | 6.15247298  | 1.04911456  | 3.23676499  |
| O | 2.69203200  | 5.05000265  | 0.90681330  |
| O | 0.83213198  | 6.89685083  | -0.53270020 |
| C | 1.44675349  | 8.17708670  | -0.71104392 |
| C | 2.53084171  | 8.39949214  | 0.33253113  |
| O | 3.63060141  | 7.54878401  | 0.10523948  |
| O | -1.92507884 | 6.29842399  | -0.72665014 |
| O | -5.15675220 | 4.61515076  | -1.35407939 |
| C | -5.90632785 | 5.51659553  | -2.16158390 |
| C | -5.34544911 | 6.92266325  | -2.01352882 |
| O | -4.01035561 | 6.96123181  | -2.46216558 |
| O | -5.73449964 | 2.27927997  | -0.08349841 |
| O | -4.14642653 | -0.40246332 | 2.25546576  |
| C | -5.07749075 | 0.53084779  | 2.76665876  |
| C | -4.71552679 | 0.80970293  | 4.21757288  |
| O | -3.32652570 | 1.12485937  | 4.34464572  |
| O | -3.28566645 | -2.97214665 | 2.35192364  |
| O | -2.63020693 | -6.05119673 | 1.92896137  |
| C | -1.98016606 | -6.69886216 | 3.01195088  |
| C | -1.85761274 | -5.71127701 | 4.16508233  |
| O | -1.20171705 | -4.51864110 | 3.74906466  |
| O | -0.13089940 | -7.50760386 | 0.83566841  |
| O | 0.74546172  | -6.12205459 | -1.23061290 |
| O | 2.96496594  | -7.72879636 | -0.91969970 |
| C | 2.99985206  | -8.97869596 | -1.60325030 |
| C | 1.97329395  | -9.93107690 | -1.00655715 |
| O | 0.66645770  | -9.43682670 | -1.23201785 |
| O | 4.72898004  | -5.68848448 | -0.38620918 |
| C | 1.76044516  | -2.70897532 | -3.09830981 |
| O | 0.39847733  | -2.38028046 | -3.21904564 |
| C | -1.44476866 | -5.51273045 | -3.52510439 |
| O | -1.55974215 | -4.22324482 | -4.07200368 |
| C | -4.80463902 | -3.50285931 | -2.41453312 |
| O | -4.08842986 | -3.23074422 | -3.60027274 |
| C | -2.69976085 | -0.02866554 | -3.24859267 |
| O | -3.81974806 | -0.52243623 | -3.96032232 |
| C | -0.87011322 | 3.74522046  | -4.81098751 |
| O | 0.18978790  | 3.15441981  | -5.51760387 |

|   |             |              |             |
|---|-------------|--------------|-------------|
| C | 3.80232434  | 3.63645847   | -3.68815071 |
| O | 4.43367924  | 4.88442194   | -3.84455454 |
| C | 6.11927746  | -0.24554815  | -2.17648583 |
| O | 6.26454839  | -1.10384214  | -3.27587829 |
| C | 2.69738121  | -5.68104853  | 4.05049823  |
| C | 3.03057246  | 9.83263209   | 0.27074337  |
| C | -6.15439435 | 7.91340836   | -2.83137415 |
| C | -5.58364028 | 1.89224878   | 4.83023660  |
| C | -3.20017445 | -5.32074766  | 4.75565364  |
| C | 6.96641476  | 2.75983543   | 4.65967667  |
| C | 2.08516820  | -11.30714245 | -1.64004646 |
| H | 5.14659686  | -3.69005204  | 0.22560710  |
| H | 5.27437440  | -1.89917414  | 1.86347330  |
| H | 2.87277017  | -0.64571421  | 0.47063771  |
| H | 5.78410915  | 0.26096151   | 0.53381007  |
| H | 6.09083986  | 2.24288945   | -0.23608709 |
| H | 5.17874084  | 4.43015828   | 0.48015841  |
| H | 2.46196022  | 3.09251952   | 0.29076533  |
| H | 3.60627343  | 5.25159339   | -1.52318964 |
| H | 2.15136439  | 6.10134259   | -2.82052282 |
| H | -0.06816173 | 7.18996695   | -2.37652348 |
| H | -0.59058703 | 4.72603663   | -0.66304036 |
| H | -2.04850953 | 5.59870176   | -3.17917158 |
| H | -3.68125867 | 4.18640484   | -3.69269976 |
| H | -5.60874477 | 3.05348287   | -2.62794957 |
| H | -3.71804880 | 2.70803257   | -0.26746027 |
| H | -5.08852442 | 0.66716020   | -2.08763909 |
| H | -5.88298176 | -0.04779122  | 0.02048062  |
| H | -5.57351131 | -1.77524128  | 1.68127448  |
| H | -2.70162551 | -1.88337839  | 0.69750253  |
| H | -4.94957181 | -3.92928309  | 0.43830893  |
| H | -4.25876694 | -5.88563071  | -0.19896497 |
| H | -2.72166277 | -7.57772196  | 0.51602576  |
| H | -0.53405757 | -5.49352757  | 0.61445607  |
| H | -0.74437352 | -7.49526177  | -1.66061181 |
| H | 1.23633080  | -7.03930982  | -3.01105775 |
| H | 3.68141499  | -6.69536991  | -2.57458655 |
| H | 2.71788946  | -5.37952736  | -0.00073122 |
| H | 4.16620263  | -3.98377913  | -2.28061561 |
| H | 1.23953321  | -3.88628324  | -1.41901873 |
| H | -1.33893802 | -4.49290421  | -1.65467850 |
| H | -3.39311352 | -2.17412889  | -1.51446675 |
| H | -2.15927862 | 1.49100723   | -1.84804486 |
| H | -0.07759173 | 3.26989241   | -2.86755837 |
| H | 3.07411283  | 2.31051146   | -2.16599965 |
| H | 4.10163082  | -0.85166031  | -1.77603443 |
| H | 3.73037728  | 1.13590120   | 1.86284528  |
| H | -2.80730613 | -3.80742369  | 2.18723359  |
| H | 4.72328840  | -6.61210568  | -0.10109903 |
| H | 1.87015217  | 5.37823594   | 0.49942265  |
| H | -1.50123847 | 6.81915365   | -0.03318879 |
| H | -6.02172264 | 3.19357494   | 0.04855059  |
| H | 0.78544493  | -7.28281436  | 0.60756330  |
| H | 4.54370673  | -3.62841844  | 3.44692866  |
| H | 4.07031733  | -4.53777045  | 1.98415999  |
| H | 2.22426814  | -3.58856622  | 4.21687533  |
| H | 1.78338145  | -6.01870184  | 4.54715054  |
| H | 3.49533400  | -5.65201540  | 4.79796439  |

|   |             |              |             |
|---|-------------|--------------|-------------|
| H | 2.96077827  | -6.41442906  | 3.28239636  |
| H | 1.54611228  | -3.64384861  | 1.89407001  |
| H | 0.67293298  | 8.95517098   | -0.64797071 |
| H | 1.91902886  | 8.23594740   | -1.70027169 |
| H | 2.08913374  | 8.21273322   | 1.32640939  |
| H | 2.22716639  | 10.55053948  | 0.45932603  |
| H | 3.46293569  | 10.03942045  | -0.71347799 |
| H | 3.81434242  | 9.97894463   | 1.01688536  |
| H | 3.42998817  | 6.67833249   | 0.48639486  |
| H | -6.96357263 | 5.48017455   | -1.86181840 |
| H | -5.84333095 | 5.23059048   | -3.22002375 |
| H | -5.40059299 | 7.19838755   | -0.94829629 |
| H | -7.20609498 | 7.92254601   | -2.52948017 |
| H | -6.09861485 | 7.66053059   | -3.89528261 |
| H | -5.74691073 | 8.91884574   | -2.70505371 |
| H | -3.42610276 | 6.69768007   | -1.73306392 |
| H | -6.09903308 | 0.12323950   | 2.73194389  |
| H | -5.07088493 | 1.44829081   | 2.16142300  |
| H | -4.83273715 | -0.12434455  | 4.78017880  |
| H | -5.30224134 | 2.06048918   | 5.87247682  |
| H | -6.64090512 | 1.61257206   | 4.80087945  |
| H | -5.47191425 | 2.83649572   | 4.28446467  |
| H | -3.18736939 | 2.02031841   | 4.01176622  |
| H | -0.47195462 | -5.88871286  | -3.84588001 |
| H | -2.21451036 | -6.19365287  | -3.91424387 |
| H | -2.46839049 | -3.88650125  | -3.91735486 |
| H | -4.66182588 | -4.56767660  | -2.22714026 |
| H | -5.87823260 | -3.31409841  | -2.54561567 |
| H | -4.15459610 | -2.28177412  | -3.81934883 |
| H | -0.98471152 | -7.03885618  | 2.71356250  |
| H | -2.55343166 | -7.58133066  | 3.33497324  |
| H | -1.26446318 | -6.21868792  | 4.94436300  |
| H | -3.06477738 | -4.65057217  | 5.60882694  |
| H | -3.72971287 | -6.21023380  | 5.10802677  |
| H | -3.82180632 | -4.81695240  | 4.01148095  |
| H | -0.35106065 | -4.72322012  | 3.32247388  |
| H | -1.87247251 | 0.20737661   | -3.93025874 |
| H | -2.36141503 | -0.82674839  | -2.58678096 |
| H | -4.08692149 | 0.14618665   | -4.59997099 |
| H | 5.57962323  | 4.35422154   | 2.99157499  |
| H | 6.57062203  | 3.27572690   | 1.97323358  |
| H | 4.89518091  | 2.30420352   | 4.30773050  |
| H | 7.91108743  | 2.80552026   | 4.10850936  |
| H | 7.08316192  | 2.02733628   | 5.46121053  |
| H | 6.77235756  | 3.73993717   | 5.10493200  |
| H | 5.32418028  | 0.61586642   | 2.97148956  |
| H | -1.66850016 | 3.00353194   | -4.74517741 |
| H | -1.26266192 | 4.63551933   | -5.32968984 |
| H | 0.86917526  | 3.83235569   | -5.60336862 |
| H | 4.01065296  | -9.40254683  | -1.52665803 |
| H | 2.76818618  | -8.84473624  | -2.66754886 |
| H | 2.17228516  | -10.00951379 | 0.07325431  |
| H | 1.87637166  | -11.24739414 | -2.71303461 |
| H | 1.35062514  | -11.98108873 | -1.19406593 |
| H | 3.08210997  | -11.73648014 | -1.50216925 |
| H | 0.34310963  | -8.99740924  | -0.43376247 |
| H | 4.32483104  | 2.83803431   | -4.23424336 |
| H | 2.79687775  | 3.72861062   | -4.10779295 |

|   |             |             |             |
|---|-------------|-------------|-------------|
| H | 5.33672013  | 4.79019720  | -3.52178754 |
| H | 2.24713690  | -1.85673078 | -2.61541328 |
| H | 2.24004592  | -2.86671444 | -4.07557220 |
| H | -0.10606829 | -3.09815131 | -3.64948703 |
| H | 5.83366185  | 0.73808801  | -2.55956185 |
| H | 7.06243489  | -0.13261492 | -1.61514053 |
| H | 6.47072996  | -1.97191044 | -2.91041276 |
| H | -2.18814363 | -0.33701477 | 3.76146479  |
| H | -2.24519934 | -1.90752433 | 3.23360621  |
| H | -1.69607483 | -0.98239528 | 5.98185698  |
| H | -3.07666831 | -1.90613988 | 5.34400222  |
| H | -1.47519076 | -2.67607404 | 5.40371519  |
| H | 1.70598764  | 4.04051290  | 3.27653107  |
| H | 0.66242198  | 6.27798347  | 3.22679793  |
| H | -2.04950803 | 2.27954204  | 2.16428525  |
| H | -0.48985956 | -2.64748445 | 1.22949298  |
| H | -0.19118780 | -1.87524062 | -1.13675103 |
| H | 0.28217144  | 0.49804885  | -1.57765212 |
| H | 0.50850860  | 2.09842505  | 0.29238924  |
| H | 1.59654855  | 1.74339610  | 2.88777093  |
| H | -0.85501006 | 1.22376882  | 4.59258527  |
| H | 0.76478161  | 1.66197733  | 5.08394473  |
| H | 0.47084229  | -0.76201971 | 5.48536736  |
| H | 1.61403289  | -0.55081594 | 4.16283290  |
| H | 0.03551934  | -2.27841966 | 3.53077271  |

255

2-HP-B-CD:trans-(1R,4S)-SRT\_1\_Cl E(Ha)= -7253.8912020040

|    |             |             |             |
|----|-------------|-------------|-------------|
| Cl | 6.64506052  | 2.37045265  | 6.74338580  |
| Cl | 4.56535056  | -0.02040399 | 7.16792893  |
| O  | -6.96944797 | -0.23636639 | -0.71935152 |
| O  | -4.37621025 | -2.81306123 | -0.73054747 |
| O  | -4.43125708 | -4.84107153 | -1.81236083 |
| O  | -0.77765213 | -4.97647613 | -1.92084682 |
| O  | 0.48750145  | -5.64481313 | -3.71757922 |
| O  | 3.23358161  | -3.71213900 | -2.29769978 |
| O  | 4.99094976  | -2.88278066 | -3.55493016 |
| O  | 4.43928954  | 0.40096342  | -2.02802310 |
| O  | 4.89079369  | 2.34001815  | -3.21299383 |
| O  | 1.77642461  | 3.83805744  | -1.99292440 |
| O  | 0.58432643  | 5.31773513  | -3.32421870 |
| O  | -2.64706368 | 4.08689930  | -2.10142725 |
| O  | -4.56786761 | 3.85567761  | -3.34705939 |
| O  | -3.95311374 | 5.83964770  | -0.36803609 |
| O  | -6.03682524 | 4.10916376  | 0.43356578  |
| O  | -5.29400671 | 1.37808242  | -0.83600315 |
| O  | -1.44619998 | 4.89734658  | 0.30953372  |
| O  | 1.30673669  | 5.40875410  | 0.24905476  |
| O  | -1.72882116 | 6.25630470  | -4.68630741 |
| O  | 3.20795757  | 3.48767191  | 0.40887151  |
| O  | 5.33082991  | 1.59521155  | 0.31812039  |
| O  | 4.27686127  | 4.77409289  | -4.41817443 |
| O  | 4.94556760  | -3.92587570 | -0.06229284 |
| O  | 5.26522591  | -1.15710843 | 0.20378049  |
| O  | 2.99202314  | -5.85011888 | -0.43607271 |
| O  | 0.38243177  | -6.92321632 | -0.31002148 |
| O  | 2.57546441  | -5.54756205 | -5.48742987 |
| O  | -3.27550642 | -6.85371333 | -3.49237705 |
| O  | -3.76713449 | -4.04675493 | 1.68089566  |
| O  | -1.26732763 | -5.05712984 | 0.89062995  |
| O  | -3.72979486 | -1.39071582 | 1.64334025  |
| O  | -4.85989755 | 1.13467654  | 1.93988383  |
| O  | -7.92485485 | -2.91648687 | -0.93014270 |
| O  | -6.87383281 | 2.54604513  | -4.09516773 |
| O  | 6.55258553  | -0.93604775 | -4.73319912 |
| O  | -5.53982171 | -2.54935469 | 3.43841754  |
| O  | -7.14422072 | 2.55486437  | 2.50069608  |
| O  | -1.79283266 | 7.68246625  | 0.12370896  |
| O  | 3.88917005  | 5.85313228  | 1.70337426  |
| O  | 7.73027427  | 0.03538321  | 0.75739913  |
| O  | 5.69671851  | -6.53439513 | -0.77685163 |
| O  | -2.02176408 | -7.73668406 | 1.05902801  |
| N  | -2.03715094 | 0.80352997  | 1.72720695  |
| C  | -1.56968023 | 1.35782671  | 0.43406295  |
| C  | 3.91195933  | 3.02081572  | 3.90041172  |
| C  | 5.02260997  | 3.13329257  | 4.72900756  |
| C  | 5.24846654  | 2.20620345  | 5.74309254  |
| C  | 4.33784991  | 1.15903063  | 5.92598527  |
| C  | 3.22478160  | 1.05651622  | 5.09726937  |
| C  | 2.99848059  | 1.97949747  | 4.07495090  |
| C  | 1.46136273  | 0.51555330  | 2.67254479  |
| C  | 0.15193179  | 0.02229700  | 2.55579393  |
| C  | -0.05560371 | -1.30394931 | 2.14895169  |
| C  | 1.00633422  | -2.12192581 | 1.79112524  |

|   |             |             |             |
|---|-------------|-------------|-------------|
| C | 2.30359898  | -1.61136454 | 1.83068851  |
| C | 2.51873008  | -0.31298098 | 2.27503408  |
| C | 1.74297203  | 1.90343079  | 3.22736200  |
| C | 0.54262292  | 2.41418531  | 4.03589247  |
| C | -0.73567785 | 2.33325346  | 3.21428706  |
| C | -1.05508170 | 0.88030197  | 2.87846600  |
| C | -6.16124542 | -1.28318915 | -1.25270079 |
| C | -5.31695958 | -1.93073965 | -0.15187984 |
| C | -4.54162630 | -0.86156596 | 0.60099944  |
| C | -5.53252996 | 0.15235220  | 1.15687357  |
| C | -6.26884462 | 0.77340169  | -0.03814837 |
| C | -4.59781201 | -4.20394337 | -0.58683577 |
| C | -3.12608277 | -4.69690298 | -2.38258275 |
| C | -2.07325425 | -5.23155982 | -1.41185886 |
| C | -2.18195203 | -4.54527221 | -0.05386061 |
| C | -3.60401152 | -4.73862375 | 0.45179899  |
| C | -0.08873635 | -6.05891742 | -2.51839270 |
| C | 0.98201584  | -6.55186536 | -1.53466603 |
| C | 1.95841886  | -5.42127769 | -1.28338099 |
| C | 2.51590191  | -4.89764741 | -2.60263244 |
| C | 1.41695953  | -4.56186715 | -3.60906976 |
| C | 4.62647744  | -3.68054060 | -2.45880145 |
| C | 4.56592695  | -1.52044797 | -3.48620693 |
| C | 5.06293461  | -0.86579171 | -2.19638324 |
| C | 4.71399991  | -1.70158998 | -0.97109160 |
| C | 5.24028988  | -3.10888619 | -1.17665819 |
| C | 5.21460164  | 1.56710350  | -2.08670466 |
| C | 4.95660487  | 2.36545988  | -0.80193280 |
| C | 3.48694694  | 2.74466221  | -0.75604650 |
| C | 3.16808491  | 3.54648993  | -2.01287875 |
| C | 3.53202231  | 2.77303620  | -3.28021581 |
| C | 1.35585157  | 5.16919087  | -2.16272532 |
| C | 0.53635938  | 5.56001979  | -0.92441442 |
| C | -0.68980382 | 4.65940597  | -0.86233154 |
| C | -1.48256122 | 4.89508683  | -2.13856399 |
| C | -0.62252630 | 4.55437748  | -3.35708833 |
| C | -3.85654838 | 4.70416349  | -2.50180237 |
| C | -4.82976943 | 2.56673989  | -2.80157962 |
| C | -5.55450195 | 2.64073558  | -1.45313527 |
| C | -5.06660893 | 3.75369459  | -0.51583715 |
| C | -4.69182162 | 5.02439799  | -1.26100981 |
| C | -5.67431635 | 1.86075358  | -3.85138713 |
| C | -1.31325076 | 4.91162301  | -4.66151213 |
| C | 3.44415856  | 3.64583208  | -4.52139463 |
| C | 5.15003632  | -0.85737732 | -4.72313454 |
| C | 1.97041535  | -4.37313643 | -5.01244798 |
| C | -3.14581124 | -5.46658210 | -3.69109436 |
| C | -7.11300293 | -2.28185532 | -1.88845415 |
| C | -4.06513955 | 7.24138071  | -0.59980245 |
| C | 1.75497243  | 6.64002187  | 0.82557074  |
| C | 6.47476722  | 2.07207188  | 1.03393055  |
| C | 6.05518186  | -4.56732284 | 0.57283088  |
| C | -0.05957455 | -8.27730954 | -0.25658358 |
| C | -4.70627513 | -4.65777871 | 2.57128223  |
| C | -5.31995211 | 1.30045181  | 3.27967441  |
| C | -4.92232657 | -3.77457545 | 3.79057036  |
| C | -0.83794120 | -8.50887815 | 1.03011747  |
| C | 5.89975903  | -6.08525105 | 0.54825507  |

|   |             |             |             |
|---|-------------|-------------|-------------|
| C | 7.18547549  | 0.91184012  | 1.71597082  |
| C | 2.61530350  | 6.34868973  | 2.04591275  |
| C | -3.15288740 | 7.98624190  | 0.36421566  |
| C | -6.08655194 | 2.59813627  | 3.45267361  |
| C | -5.82223299 | -4.47257374 | 4.79281417  |
| C | -6.60602650 | 2.74219453  | 4.87165369  |
| C | -3.32406415 | 9.48540754  | 0.20755582  |
| C | 2.83518032  | 7.61747724  | 2.85046036  |
| C | 8.31792752  | 1.42975704  | 2.58550119  |
| C | 7.14344726  | -6.75082428 | 1.10931299  |
| C | -1.23331700 | -9.96846377 | 1.15430084  |
| H | -1.47698143 | 2.44008629  | 0.51826644  |
| H | -0.61199938 | 0.90285353  | 0.18031018  |
| H | -2.31434322 | 1.13120113  | -0.32915522 |
| H | -2.32954619 | -0.18507720 | 1.61518519  |
| H | -2.93998042 | 1.24712171  | 1.96530563  |
| H | 3.77173363  | 3.75763772  | 3.11461490  |
| H | 5.72636466  | 3.94830761  | 4.59437413  |
| H | 2.53987127  | 0.22852746  | 5.25389656  |
| H | -1.06029641 | -1.72482388 | 2.13056213  |
| H | 0.81141664  | -3.14917699 | 1.49685755  |
| H | 3.15370895  | -2.22046428 | 1.53630389  |
| H | 3.53277777  | 0.07040120  | 2.33129406  |
| H | 1.89631534  | 2.57797265  | 2.37281396  |
| H | 0.44642783  | 1.82390704  | 4.95654789  |
| H | 0.72215436  | 3.44860844  | 4.34402408  |
| H | -1.57917632 | 2.77881267  | 3.75465840  |
| H | -0.59746456 | 2.93006088  | 2.30553868  |
| H | -1.60311560 | 0.42465654  | 3.71383473  |
| H | -5.47907583 | -0.88678760 | -2.01803544 |
| H | -5.97882884 | -2.46150104 | 0.54547316  |
| H | -3.89265207 | -0.35782403 | -0.12664847 |
| H | -6.26897267 | -0.36691956 | 1.78133632  |
| H | -7.02809792 | 1.48430091  | 0.29672100  |
| H | -5.63575626 | -4.38906144 | -0.28678635 |
| H | -2.92337271 | -3.63649276 | -2.58618352 |
| H | -2.23201490 | -6.30837217 | -1.27008605 |
| H | -1.99701357 | -3.46944407 | -0.19514003 |
| H | -3.78100042 | -5.81155724 | 0.60660985  |
| H | -0.79554805 | -6.85405286 | -2.78118218 |
| H | 1.51346057  | -7.40898592 | -1.97271074 |
| H | 1.40076776  | -4.59537413 | -0.81528304 |
| H | 3.17896292  | -5.65010213 | -3.05130483 |
| H | 0.89555421  | -3.65365007 | -3.27791399 |
| H | 5.02798785  | -4.68054900 | -2.65293904 |
| H | 3.46801422  | -1.46500075 | -3.50814666 |
| H | 6.15310502  | -0.74712666 | -2.26234926 |
| H | 3.61832117  | -1.74680887 | -0.88419824 |
| H | 6.32681415  | -3.06417764 | -1.32397899 |
| H | 6.27877211  | 1.32449804  | -2.18131063 |
| H | 5.55517467  | 3.28500364  | -0.84090989 |
| H | 2.88721224  | 1.82296022  | -0.76004397 |
| H | 3.74772535  | 4.47960316  | -2.00328483 |
| H | 2.86223474  | 1.90685011  | -3.37796087 |
| H | 2.21894830  | 5.83080880  | -2.29518862 |
| H | 0.20845290  | 6.60285693  | -1.02483490 |
| H | -0.34142909 | 3.61691306  | -0.85092598 |
| H | -1.75727483 | 5.95637308  | -2.19067791 |

|   |             |             |             |
|---|-------------|-------------|-------------|
| H | -0.39027798 | 3.47964696  | -3.34499191 |
| H | -3.63990383 | 5.60344303  | -3.08936352 |
| H | -3.88309976 | 2.02964556  | -2.65656749 |
| H | -6.62826352 | 2.77388265  | -1.63736524 |
| H | -4.15048014 | 3.37569012  | -0.03543094 |
| H | -5.61222736 | 5.53763173  | -1.57139054 |
| H | -5.07347911 | 1.74315788  | -4.76547093 |
| H | -5.94112836 | 0.86411014  | -3.48834062 |
| H | -0.63490677 | 4.67729154  | -5.49422289 |
| H | -2.21118288 | 4.29631665  | -4.77226884 |
| H | 3.69038687  | 3.03272061  | -5.40070558 |
| H | 2.41986757  | 4.01261872  | -4.63417769 |
| H | 4.70617378  | -1.32312817 | -5.61587340 |
| H | 4.88752354  | 0.20469773  | -4.72201150 |
| H | 1.15756220  | -4.03377487 | -5.67234278 |
| H | 2.74328747  | -3.59922028 | -4.99052718 |
| H | -2.19803278 | -5.30462187 | -4.21295041 |
| H | -3.95365127 | -5.06522478 | -4.31977619 |
| H | -6.52995807 | -3.06344603 | -2.38494008 |
| H | -7.70706775 | -1.76188216 | -2.65297495 |
| H | -5.11001704 | 7.54520572  | -0.44816405 |
| H | -3.77295834 | 7.49156042  | -1.63024829 |
| H | 0.87590549  | 7.23631774  | 1.10391592  |
| H | 2.35138974  | 7.20877222  | 0.09797724  |
| H | 6.14987359  | 2.82466268  | 1.76378364  |
| H | 7.18472211  | 2.53294869  | 0.33459823  |
| H | 6.12272120  | -4.19685305 | 1.60260108  |
| H | 6.98134316  | -4.29854456 | 0.05123997  |
| H | 0.81601226  | -8.94008852 | -0.29923520 |
| H | -0.71448327 | -8.50622407 | -1.11014333 |
| H | -4.31288573 | -5.63758970 | 2.87178418  |
| H | -5.67139165 | -4.80398523 | 2.06632484  |
| H | -4.44386452 | 1.31330548  | 3.94086646  |
| H | -5.94581910 | 0.44968531  | 3.57497465  |
| H | -3.93786988 | -3.58942701 | 4.25055813  |
| H | -0.18176301 | -8.23478296 | 1.87170524  |
| H | 5.03313370  | -6.35548857 | 1.17109642  |
| H | 6.45554535  | 0.38750533  | 2.35536036  |
| H | 2.06279750  | 5.61911036  | 2.66599206  |
| H | -3.43568395 | 7.69009475  | 1.38733398  |
| H | -5.41546000 | 3.43776371  | 3.21004482  |
| H | -5.38463161 | -5.41382580 | 5.13623330  |
| H | -6.79984685 | -4.68092947 | 4.34701502  |
| H | -5.97783378 | -3.82492144 | 5.65823958  |
| H | -5.78526780 | 2.74568042  | 5.59533695  |
| H | -7.28656623 | 1.92170881  | 5.11839324  |
| H | -7.14707587 | 3.68609808  | 4.99218202  |
| H | -4.35220715 | 9.79535301  | 0.41426627  |
| H | -3.06128836 | 9.79504134  | -0.80886591 |
| H | -2.65802164 | 10.00442117 | 0.90008579  |
| H | 1.89202440  | 8.02233313  | 3.22754752  |
| H | 3.32661574  | 8.37784283  | 2.23550913  |
| H | 3.48804623  | 7.40071924  | 3.69880372  |
| H | 7.95056137  | 2.09311150  | 3.37406085  |
| H | 9.04767804  | 1.97316101  | 1.97659248  |
| H | 8.83251512  | 0.58684988  | 3.05142098  |
| H | 7.36375875  | -6.40309915 | 2.12346936  |
| H | 8.00621416  | -6.53503879 | 0.47117083  |



|   |             |              |             |
|---|-------------|--------------|-------------|
| H | 7.00655535  | -7.83405367  | 1.13484770  |
| H | -0.35660191 | -10.62206271 | 1.16777109  |
| H | -1.87717750 | -10.26114615 | 0.31876124  |
| H | -1.79358740 | -10.11854263 | 2.07964005  |
| H | -6.23248171 | 3.36306492   | 1.02141307  |
| H | -2.38199731 | 5.01721925   | 0.04567058  |
| H | -0.93373467 | 6.79743131   | -4.61801478 |
| H | 2.37705891  | 3.98288870   | 0.25607543  |
| H | 5.17844151  | 4.44251630   | -4.33396938 |
| H | 5.05444697  | -0.20125070  | 0.21350022  |
| H | 3.53679461  | -5.06283570  | -0.23037626 |
| H | 1.89518131  | -6.23060680  | -5.46968601 |
| H | -4.12019133 | -7.00100425  | -3.05206244 |
| H | -0.54628517 | -5.50485772  | 0.40393525  |
| H | -3.63374675 | -2.36885370  | 1.51268979  |
| H | -8.48265170 | -2.23542258  | -0.53787200 |
| H | -6.62959116 | 3.42446596   | -4.40874887 |
| H | 6.77207436  | -1.87500599  | -4.71658058 |
| H | -4.87386603 | -2.00376471  | 2.99552794  |
| H | -7.74739798 | 3.28621123   | 2.67611454  |
| H | -1.62047754 | 6.77779567   | 0.42957059  |
| H | 3.79687081  | 5.03967551   | 1.17986133  |
| H | 7.02745364  | -0.57579162  | 0.48788075  |
| H | 4.73785455  | -6.58455980  | -0.90240154 |
| H | -1.77299686 | -6.81406787  | 1.23390781  |

2-HP-B-CD:trans-(1R,4S)-SRT\_2\_Cl E(Ha)= -7253.8879680249

|    |             |             |             |
|----|-------------|-------------|-------------|
| Cl | -0.23703279 | -7.33684230 | 4.63450559  |
| Cl | -1.43981323 | -4.89907668 | 6.31405428  |
| O  | 2.40467319  | 6.41566655  | -1.82849602 |
| O  | -0.99490917 | 5.21690689  | -1.14297913 |
| O  | -2.89611891 | 5.77670130  | -2.32400416 |
| O  | -4.52170650 | 2.65551797  | -1.32192594 |
| O  | -5.87091703 | 1.56406659  | -2.85197577 |
| O  | -4.56895043 | -1.59119063 | -1.56380637 |
| O  | -4.62959165 | -3.52472687 | -2.83899953 |
| O  | -1.07884393 | -4.10940081 | -2.13987181 |
| O  | 0.29697412  | -4.87597082 | -3.83363678 |
| O  | 3.17535515  | -3.20667744 | -2.30648419 |
| O  | 4.81145124  | -2.32481854 | -3.69783529 |
| O  | 5.11469278  | 0.57217508  | -1.51771073 |
| O  | 6.31320902  | 2.54101247  | -1.80105673 |
| O  | 5.44477283  | 0.85217793  | 1.31598290  |
| O  | 3.70252423  | 2.98653217  | 1.42504674  |
| O  | 3.27353917  | 4.42660298  | -1.06338264 |
| O  | 6.07358991  | -1.55872215 | 0.16456073  |
| O  | 5.03255513  | -4.12077619 | -0.56895480 |
| O  | 6.45375811  | -0.43239788 | -4.81389989 |
| O  | 2.50413208  | -5.11164251 | -0.32337527 |
| O  | -0.16190620 | -6.07430790 | -0.42847410 |
| O  | 2.57712027  | -4.90597964 | -5.43318233 |
| O  | -4.76005519 | -3.11870198 | 0.77845463  |
| O  | -2.22500218 | -4.31023206 | 0.46378790  |
| O  | -6.03195957 | -0.63989068 | 0.65645556  |
| O  | -6.33601647 | 2.21300602  | 0.69537958  |
| O  | -6.79269166 | -0.52210764 | -4.36429325 |
| O  | -5.33973858 | 5.28284253  | -3.62701737 |
| O  | -2.21447266 | 5.94268845  | 1.25344507  |
| O  | -4.19512105 | 3.92891733  | 1.17011174  |
| O  | 0.20425932  | 4.87254244  | 1.41635890  |
| O  | 2.91689650  | 5.42020192  | 1.63736294  |
| O  | 0.30113599  | 8.14598106  | -2.64445737 |
| O  | 6.52184885  | 5.35122625  | -2.15491104 |
| O  | -3.41575773 | -5.60869924 | -4.33898701 |
| O  | -0.00881806 | 7.43176818  | 2.48088183  |
| O  | 5.48111321  | 4.77121865  | 2.76943436  |
| O  | 8.11978382  | 0.04211557  | 1.30278344  |
| O  | 4.75510614  | -6.90063758 | -0.08439454 |
| O  | -2.85370168 | -6.99284164 | 0.21096823  |
| O  | -7.57020471 | -3.00777822 | 0.73658505  |
| O  | -6.75033285 | 5.00930100  | 1.43484845  |
| N  | 1.08970363  | 2.12941356  | 1.68701777  |
| C  | 0.76111046  | 1.42968103  | 0.42151592  |
| C  | 0.87846407  | -4.13389829 | 2.52585241  |
| C  | 0.69543833  | -5.44069004 | 2.95989677  |
| C  | -0.01678904 | -5.70159815 | 4.12651688  |
| C  | -0.54506540 | -4.63236966 | 4.86067356  |
| C  | -0.35336944 | -3.32634440 | 4.42050237  |
| C  | 0.35669054  | -3.06138880 | 3.24848999  |
| C  | -0.61223391 | -0.76106421 | 2.69188147  |
| C  | -0.50051748 | 0.63153266  | 2.84198627  |
| C  | -1.64561874 | 1.43679473  | 2.80784973  |
| C  | -2.89770580 | 0.88107150  | 2.58419458  |

|   |             |             |             |
|---|-------------|-------------|-------------|
| C | -3.00560263 | -0.49420651 | 2.38569934  |
| C | -1.87760057 | -1.30517311 | 2.44271753  |
| C | 0.62408255  | -1.64018931 | 2.80342154  |
| C | 1.64599394  | -0.96441201 | 3.72789689  |
| C | 2.04799561  | 0.39074260  | 3.16972138  |
| C | 0.84148474  | 1.31471463  | 2.94920167  |
| C | 1.09414321  | 5.91767635  | -2.11532850 |
| C | 0.22077914  | 5.87348284  | -0.85251382 |
| C | 0.96090660  | 5.11693629  | 0.24358408  |
| C | 2.23256045  | 5.91996547  | 0.50506583  |
| C | 3.07709138  | 5.79719053  | -0.77665746 |
| C | -2.16562629 | 6.01769304  | -1.16755259 |
| C | -3.38099102 | 4.43844592  | -2.47943570 |
| C | -4.20103263 | 4.03164777  | -1.25633960 |
| C | -3.42215118 | 4.24491886  | 0.03918285  |
| C | -2.98789846 | 5.69918420  | 0.08916917  |
| C | -5.84137909 | 2.28116977  | -1.65413871 |
| C | -6.38378049 | 1.44309487  | -0.48976191 |
| C | -5.53664388 | 0.19439243  | -0.36260916 |
| C | -5.51914944 | -0.54724003 | -1.69565059 |
| C | -5.11301993 | 0.35045147  | -2.86242590 |
| C | -4.99329953 | -2.92843618 | -1.62347726 |
| C | -3.22474012 | -3.53255474 | -3.09738645 |
| C | -2.48215422 | -4.22941245 | -1.95697854 |
| C | -2.82826859 | -3.61231567 | -0.60627440 |
| C | -4.34041847 | -3.67042262 | -0.45411031 |
| C | -0.39728972 | -5.22360789 | -2.66867073 |
| C | 0.56460506  | -5.73979183 | -1.59081571 |
| C | 1.58833960  | -4.65859548 | -1.29128967 |
| C | 2.28832113  | -4.28084353 | -2.59372321 |
| C | 1.28842982  | -3.86231802 | -3.67062333 |
| C | 4.50992548  | -3.30174834 | -2.73958177 |
| C | 5.41233925  | -3.14605201 | -1.51145754 |
| C | 5.23594717  | -1.74756527 | -0.95131562 |
| C | 5.49994638  | -0.70099827 | -2.02676126 |
| C | 4.66530849  | -0.96889949 | -3.27856262 |
| C | 6.09362592  | 1.42036737  | -0.98170369 |
| C | 5.16650175  | 3.34526307  | -2.05384468 |
| C | 4.51748975  | 3.81489930  | -0.74640234 |
| C | 4.27987098  | 2.62298931  | 0.17412000  |
| C | 5.60718437  | 1.90840544  | 0.38808316  |
| C | 5.64644460  | 4.52510082  | -2.88259029 |
| C | 5.12780949  | -0.13722087 | -4.46477257 |
| C | 1.94330872  | -3.71637195 | -5.03437622 |
| C | -3.05069628 | -4.25291290 | -4.42355151 |
| C | -5.41712448 | -0.29288793 | -4.20662527 |
| C | -4.21460976 | 4.44948753  | -3.74983687 |
| C | 0.50743221  | 6.85309366  | -3.15901501 |
| C | 6.23077988  | 0.93775354  | 2.50997891  |
| C | 6.08318100  | -4.88576565 | 0.01575922  |
| C | -0.55792588 | -7.44782890 | -0.39052216 |
| C | -5.54351515 | -3.96799744 | 1.62338804  |
| C | -7.59560285 | 2.77578820  | 1.06861281  |
| C | -2.32163575 | 7.28060106  | 1.75265472  |
| C | 3.74291527  | 6.38703730  | 2.30440137  |
| C | -1.35700974 | 7.49504099  | 2.91012982  |
| C | -7.39323750 | 3.91703434  | 2.05379305  |
| C | -6.89449329 | -3.33222505 | 1.93634421  |

|   |             |             |             |
|---|-------------|-------------|-------------|
| C | -1.67585148 | -7.65253961 | 0.62078722  |
| C | 5.46586812  | -6.04858731 | 0.78135943  |
| C | 7.38395091  | -0.06696715 | 2.50579102  |
| C | 4.58212093  | 5.68811935  | 3.36342762  |
| C | -1.58074039 | 8.86291685  | 3.52840936  |
| C | 5.39869279  | 6.70359529  | 4.14059626  |
| C | 8.30885611  | 0.18796456  | 3.68186268  |
| C | 6.54848192  | -6.86970474 | 1.45798701  |
| C | -1.99034736 | -9.13125518 | 0.76092397  |
| C | -7.75271302 | -4.29054901 | 2.74298511  |
| C | -8.73390137 | 4.40047413  | 2.57805400  |
| H | 1.26430793  | 0.46232422  | 0.40185843  |
| H | -0.31554588 | 1.28016869  | 0.35602674  |
| H | 1.11063306  | 2.03519118  | -0.41520099 |
| H | 0.56982100  | 3.02779833  | 1.72465525  |
| H | 2.10637843  | 2.39467966  | 1.65957074  |
| H | 1.44585728  | -3.97445335 | 1.61264318  |
| H | 1.10481026  | -6.26261135 | 2.38306660  |
| H | -0.78325378 | -2.51649499 | 5.00225746  |
| H | -1.55918890 | 2.51332951  | 2.95186876  |
| H | -3.77805695 | 1.51509460  | 2.55561567  |
| H | -3.97649930 | -0.93534760 | 2.19082445  |
| H | -1.97983428 | -2.37556743 | 2.28297953  |
| H | 1.08715334  | -1.71035780 | 1.80564956  |
| H | 1.21216057  | -0.86070679 | 4.72992652  |
| H | 2.53182752  | -1.59886888 | 3.82884391  |
| H | 2.76821369  | 0.88963280  | 3.82579234  |
| H | 2.57719528  | 0.22955904  | 2.22106096  |
| H | 0.79751687  | 2.06811500  | 3.74330884  |
| H | 1.16297650  | 4.90037041  | -2.52580785 |
| H | 0.03093794  | 6.90149409  | -0.51730928 |
| H | 1.26128130  | 4.14667566  | -0.16690352 |
| H | 1.97884537  | 6.97335536  | 0.68190585  |
| H | 4.04336768  | 6.30707636  | -0.68712590 |
| H | -1.88773986 | 7.07700315  | -1.20803178 |
| H | -2.53508431 | 3.74593060  | -2.59175832 |
| H | -5.11722328 | 4.63727139  | -1.22513622 |
| H | -2.52370889 | 3.60842885  | 0.01002546  |
| H | -3.88216901 | 6.33736675  | 0.10691023  |
| H | -6.45745377 | 3.17143720  | -1.82234607 |
| H | -7.41962081 | 1.15250236  | -0.71028224 |
| H | -4.50506061 | 0.49865278  | -0.13124643 |
| H | -6.51775767 | -0.95524579 | -1.90516772 |
| H | -4.04104640 | 0.57753784  | -2.77944362 |
| H | -6.08341199 | -3.00334744 | -1.54979110 |
| H | -2.85169107 | -2.50170586 | -3.18533777 |
| H | -2.76965572 | -5.28899095 | -1.93630437 |
| H | -2.50624482 | -2.56111496 | -0.59285182 |
| H | -4.65338942 | -4.72060837 | -0.51305753 |
| H | -1.11172061 | -5.99650041 | -2.97209157 |
| H | 1.09369752  | -6.62418593 | -1.97393324 |
| H | 1.05376696  | -3.77068844 | -0.91778560 |
| H | 2.85273603  | -5.14717958 | -2.96357560 |
| H | 0.81510271  | -2.91523706 | -3.37484806 |
| H | 4.68546969  | -4.26372980 | -3.23210703 |
| H | 6.45515791  | -3.29757865 | -1.82098270 |
| H | 4.18238882  | -1.65314312 | -0.64746465 |
| H | 6.56197149  | -0.69808877 | -2.30634951 |

|   |             |             |             |
|---|-------------|-------------|-------------|
| H | 3.61021786  | -0.75621748 | -3.05297076 |
| H | 7.05991152  | 0.91906119  | -0.88599245 |
| H | 4.41733647  | 2.77379109  | -2.62071804 |
| H | 5.18664924  | 4.53355455  | -0.25333598 |
| H | 3.60010683  | 1.92198973  | -0.32698623 |
| H | 6.35309056  | 2.61865649  | 0.76455282  |
| H | 6.10863128  | 4.14183167  | -3.80284934 |
| H | 4.78439094  | 5.13736284  | -3.16400111 |
| H | 4.43444091  | -0.30081676 | -5.30357198 |
| H | 5.09267787  | 0.92216226  | -4.19464024 |
| H | 1.17751665  | -3.39691687 | -5.75678104 |
| H | 2.71525545  | -2.94326759 | -4.98636919 |
| H | -3.63409067 | -3.71889519 | -5.18814752 |
| H | -1.99710592 | -4.22299942 | -4.71566274 |
| H | -5.01205087 | 0.34577693  | -5.00638369 |
| H | -4.92149674 | -1.26648489 | -4.25803622 |
| H | -4.58455796 | 3.43880360  | -3.94380100 |
| H | -3.56969616 | 4.74825950  | -4.58915251 |
| H | -0.46947543 | 6.47057822  | -3.46886935 |
| H | 1.16719488  | 6.85857404  | -4.03770320 |
| H | 5.56131279  | 0.74435309  | 3.35658681  |
| H | 6.62673476  | 1.95500332  | 2.61721899  |
| H | 6.67990778  | -4.24463727 | 0.67710206  |
| H | 6.72971218  | -5.28941172 | -0.77628891 |
| H | 0.31731457  | -8.06220082 | -0.13551166 |
| H | -0.93076380 | -7.76283088 | -1.37542337 |
| H | -4.97755414 | -4.15554329 | 2.54374486  |
| H | -5.71154863 | -4.92949291 | 1.12444445  |
| H | -8.22015634 | 1.98507002  | 1.50606599  |
| H | -8.10470531 | 3.18070848  | 0.18273577  |
| H | -3.35509390 | 7.44457735  | 2.08424060  |
| H | -2.08577122 | 8.00413575  | 0.95978232  |
| H | 3.08713942  | 7.14376361  | 2.75338881  |
| H | 4.41380775  | 6.87120871  | 1.58295679  |
| H | -1.55648246 | 6.71668556  | 3.66384376  |
| H | -6.79117301 | 3.53598532  | 2.89561842  |
| H | -6.72164356 | -2.41883945 | 2.52638130  |
| H | -1.33417181 | -7.26335753 | 1.59339373  |
| H | 4.79610710  | -5.62769483 | 1.55086703  |
| H | 6.95897376  | -1.07826421 | 2.59131483  |
| H | 3.89652948  | 5.16711990  | 4.05123370  |
| H | -2.59869282 | 8.96869480  | 3.91314094  |
| H | -1.40069714 | 9.64978343  | 2.78917068  |
| H | -0.87988525 | 9.00948611  | 4.35282974  |
| H | 4.75865268  | 7.43922431  | 4.63556633  |
| H | 6.08744114  | 7.22871688  | 3.47176225  |
| H | 5.99311993  | 6.19077043  | 4.89936166  |
| H | 7.76790475  | 0.16160175  | 4.63326575  |
| H | 8.78634075  | 1.16731300  | 3.57867125  |
| H | 9.09487467  | -0.56953342 | 3.70954241  |
| H | 7.13608330  | -6.26606739 | 2.15594824  |
| H | 7.22197265  | -7.29723313 | 0.70859771  |
| H | 6.09169496  | -7.69542340 | 2.00754401  |
| H | -1.12026455 | -9.69763032 | 1.10518176  |
| H | -2.32243418 | -9.54286985 | -0.19770025 |
| H | -2.79978575 | -9.26364674 | 1.48183357  |
| H | -7.25151829 | -4.60163874 | 3.66487007  |
| H | -7.97824557 | -5.18274367 | 2.15047971  |

|   |             |             |             |
|---|-------------|-------------|-------------|
| H | -8.69908513 | -3.81260110 | 3.00513465  |
| H | -9.27542910 | 3.60473680  | 3.09740674  |
| H | -9.35364188 | 4.76794497  | 1.75390817  |
| H | -8.57662777 | 5.22813059  | 3.27289588  |
| H | 3.45712694  | 3.95029735  | 1.40930535  |
| H | 5.72967510  | -0.76857907 | 0.62521728  |
| H | 6.47437347  | -1.36978012 | -5.03944541 |
| H | 3.29483780  | -4.53642398 | -0.37229897 |
| H | 1.89094779  | -5.58196637 | -5.47821057 |
| H | -1.35059880 | -4.62413390 | 0.16634993  |
| H | -5.46083886 | -1.43723254 | 0.66671443  |
| H | -7.22281803 | 0.33790310  | -4.29370520 |
| H | -5.01371817 | 6.17990165  | -3.49382988 |
| H | -4.76475185 | 3.16546021  | 0.93776041  |
| H | -0.73300555 | 5.15666601  | 1.26189711  |
| H | 1.16930320  | 8.51516627  | -2.44801316 |
| H | 7.30988964  | 4.82864346  | -1.96710806 |
| H | -4.34532800 | -5.63336828 | -4.08401786 |
| H | 0.22746032  | 6.49821105  | 2.38056086  |
| H | 5.00088643  | 3.95676817  | 2.57090739  |
| H | 7.80275980  | -0.65652503 | 0.71428020  |
| H | 3.90171056  | -6.48815161 | -0.28064387 |
| H | -2.75529219 | -6.05312509 | 0.43915480  |
| H | -7.38677875 | -2.07499149 | 0.55819509  |
| H | -5.80019398 | 4.81576076  | 1.41251786  |

255

2-HP-B-CD:trans-(1R,4S)-SRT\_3\_Cl E(Ha)= -7253.8840302896

|    |             |             |             |
|----|-------------|-------------|-------------|
| Cl | -0.22931422 | 0.58251304  | -4.88843727 |
| Cl | 1.36725879  | -1.44442327 | -3.02541471 |
| O  | -2.08805085 | 6.24639421  | -1.74084365 |
| O  | -4.06818812 | 3.43048487  | -0.51672779 |
| O  | -5.89527273 | 2.56699812  | -1.65438938 |
| O  | -4.75709314 | -0.87238999 | -1.07660106 |
| O  | -4.84781874 | -2.54670977 | -2.66044758 |
| O  | -2.12441140 | -4.41207201 | -1.06314773 |
| O  | -0.79904137 | -5.82557801 | -2.34721038 |
| O  | 2.19565517  | -4.57280822 | -0.67050531 |
| O  | 4.35173356  | -4.82895635 | -1.49630402 |
| O  | 4.72417487  | -1.20736862 | -1.16981434 |
| O  | 5.79892323  | 0.30114757  | -2.54252162 |
| O  | 3.51395485  | 2.96651471  | -1.46908594 |
| O  | 2.81129465  | 4.72360126  | -2.79664055 |
| O  | 4.34491639  | 4.71787363  | 0.50855323  |
| O  | 1.76844826  | 5.67211510  | 1.11677621  |
| O  | -0.23354739 | 5.18010622  | -0.82113197 |
| O  | 4.57090038  | 2.11874996  | 1.03795521  |
| O  | 6.15850389  | -0.13993195 | 1.05700962  |
| O  | 6.05275254  | 2.78678688  | -3.90164974 |
| O  | 4.40865209  | -1.99561884 | 1.57674523  |
| O  | 3.28450744  | -4.54249510 | 1.98050505  |
| O  | 6.75830364  | -3.74748843 | -2.58131083 |
| O  | -1.97886164 | -6.13930333 | 1.06215524  |
| O  | 0.83537270  | -5.86665492 | 1.45774712  |
| O  | -4.09601138 | -4.44184211 | 0.95411403  |
| O  | -6.08083380 | -2.45820859 | 0.76330792  |
| O  | -3.99400026 | -4.66947512 | -4.19034293 |
| O  | -7.31910023 | 0.53844955  | -3.08054841 |
| O  | -5.23365066 | 2.85707380  | 1.89576132  |
| O  | -5.22681727 | 0.03862760  | 1.58614424  |
| O  | -3.25714952 | 4.71140412  | 1.92910471  |
| O  | -0.83523960 | 6.18780810  | 1.64632814  |
| O  | -4.71591568 | 6.45766787  | -2.60995462 |
| O  | 1.13511821  | 6.58905710  | -3.92170737 |
| O  | 1.45139113  | -6.82372210 | -3.53647637 |
| O  | -5.66377719 | 5.26124508  | 3.39691559  |
| O  | 1.10121206  | 8.00531400  | 2.69961041  |
| O  | 6.95849617  | 3.53813156  | 1.15775727  |
| O  | 7.11854380  | -2.59745728 | 2.25511058  |
| O  | 3.12395448  | -7.37570794 | 1.94602409  |
| O  | -4.58952110 | -7.16097627 | 1.62144724  |
| O  | -7.96819424 | -0.44546633 | 1.66051746  |
| N  | 3.06582958  | 0.27189954  | 2.56339434  |
| C  | 3.17267214  | 0.33732006  | 4.04118165  |
| C  | -1.47446964 | 1.53237805  | -1.21425863 |
| C  | -1.31131764 | 1.49505743  | -2.59088209 |
| C  | -0.42886336 | 0.58931905  | -3.17464022 |
| C  | 0.26376576  | -0.29648798 | -2.34820250 |
| C  | 0.08151367  | -0.26713899 | -0.96458681 |
| C  | -0.77065341 | 0.66407869  | -0.37333155 |
| C  | -0.58368183 | -0.44608872 | 1.88254610  |
| C  | 0.75866588  | -0.68280923 | 2.22442116  |
| C  | 1.12463188  | -1.91991139 | 2.76132610  |
| C  | 0.15810292  | -2.89667172 | 2.99554808  |

|   |             |             |             |
|---|-------------|-------------|-------------|
| C | -1.17984132 | -2.64201588 | 2.70971245  |
| C | -1.54339059 | -1.42002422 | 2.15336323  |
| C | -0.95681724 | 0.81090684  | 1.13940604  |
| C | -0.20839080 | 2.07246674  | 1.66786925  |
| C | 1.05958746  | 1.76437667  | 2.47266029  |
| C | 1.70166329  | 0.47141053  | 1.97417960  |
| C | -2.89917350 | 5.07357402  | -1.81787469 |
| C | -3.58408903 | 4.76964134  | -0.48156868 |
| C | -2.61058872 | 4.84788166  | 0.68995206  |
| C | -1.82906978 | 6.14741377  | 0.64657190  |
| C | -1.13783745 | 6.25621377  | -0.71457557 |
| C | -5.44908474 | 3.15777727  | -0.46709756 |
| C | -5.29898941 | 1.30480947  | -1.97124426 |
| C | -5.50253917 | 0.30996741  | -0.82652351 |
| C | -5.00375234 | 0.89547697  | 0.48692199  |
| C | -5.70183374 | 2.22726093  | 0.72334941  |
| C | -5.46137654 | -2.01079662 | -1.52650743 |
| C | -5.50077563 | -3.03811451 | -0.38612063 |
| C | -4.08604442 | -3.49530836 | -0.08206085 |
| C | -3.47007889 | -4.05814012 | -1.35960172 |
| C | -3.50958168 | -3.02511606 | -2.48607657 |
| C | -1.70161803 | -5.73373126 | -1.28003940 |
| C | 0.41926276  | -5.09230532 | -2.20373237 |
| C | 1.13547694  | -5.49134882 | -0.91346289 |
| C | 0.19513098  | -5.41874155 | 0.28212061  |
| C | -1.04693581 | -6.24404857 | 0.01078951  |
| C | 3.48828535  | -5.04333246 | -0.40789335 |
| C | 4.02261554  | -4.27030317 | 0.80630145  |
| C | 3.97652968  | -2.78728396 | 0.46705887  |
| C | 4.85730801  | -2.56107950 | -0.75889565 |
| C | 4.44127699  | -3.47208525 | -1.91787454 |
| C | 5.88198552  | -0.42360221 | -1.35473350 |
| C | 5.98903361  | 0.54980125  | -0.16962193 |
| C | 4.69295864  | 1.34998027  | -0.15043954 |
| C | 4.67992129  | 2.16937647  | -1.43394431 |
| C | 4.70241042  | 1.21801786  | -2.63859674 |
| C | 3.68525256  | 4.33851083  | -1.78811221 |
| C | 1.41217783  | 4.65743608  | -2.49570798 |
| C | 1.10755556  | 5.42963965  | -1.21229910 |
| C | 2.01571565  | 4.97295583  | -0.06994041 |
| C | 3.45676721  | 5.15490825  | -0.50837641 |
| C | 0.72191412  | 5.26436223  | -3.70671167 |
| C | 4.90100500  | 1.97820145  | -3.93832284 |
| C | 5.46475384  | -3.43541851 | -3.04004896 |
| C | 1.23239919  | -5.44049476 | -3.44036554 |
| C | -3.12688608 | -3.62430170 | -3.82920899 |
| C | -5.95601890 | 0.83660706  | -3.25789678 |
| C | -3.91075452 | 5.34969837  | -2.91902981 |
| C | 5.58021545  | 5.44149761  | 0.54196917  |
| C | 7.53150743  | -0.36807072 | 1.41113607  |
| C | 3.94241391  | -5.34645580 | 2.96645008  |
| C | -2.19171952 | -7.31297641 | 1.84352560  |
| C | -7.48606729 | -2.68377888 | 0.87645306  |
| C | -6.15996151 | 2.93276408  | 2.98063718  |
| C | -1.10297038 | 7.01427549  | 2.77847772  |
| C | -5.67233925 | 3.97699515  | 3.97538963  |
| C | -8.06370217 | -1.81630074 | 1.98416226  |
| C | -3.53528244 | -7.20013492 | 2.55246673  |



|   |             |             |             |
|---|-------------|-------------|-------------|
| C | 3.24503798  | -6.68879899 | 3.17357322  |
| C | 7.60188333  | -1.31558735 | 2.59908711  |
| C | 6.53380747  | 4.82818368  | 1.55660063  |
| C | 0.20659091  | 7.27786823  | 3.50906916  |
| C | -6.59023382 | 4.01923842  | 5.18384144  |
| C | -0.04568412 | 8.09137225  | 4.76550910  |
| C | 7.77072213  | 5.69584519  | 1.70083048  |
| C | 9.03925356  | -1.46971403 | 3.06149248  |
| C | 4.03838954  | -7.54506334 | 4.14519665  |
| C | -3.75427553 | -8.39946736 | 3.45764810  |
| C | -9.53057976 | -2.14255702 | 2.19801629  |
| H | 3.00162103  | 1.35993967  | 4.37576241  |
| H | 2.43853843  | -0.32923433 | 4.49258569  |
| H | 4.17945443  | 0.02679089  | 4.32336530  |
| H | 3.44939585  | -0.64207429 | 2.22662823  |
| H | 3.67711844  | 1.00792728  | 2.14523580  |
| H | -2.18569669 | 2.23584979  | -0.79278733 |
| H | -1.87388414 | 2.16531970  | -3.23320975 |
| H | 0.60618640  | -1.00232543 | -0.36224470 |
| H | 2.16228896  | -2.16251187 | 2.97594048  |
| H | 0.45320005  | -3.86272379 | 3.39163199  |
| H | -1.93645526 | -3.39869433 | 2.89297962  |
| H | -2.58590807 | -1.21036213 | 1.92552267  |
| H | -2.02787264 | 0.97744354  | 1.29664240  |
| H | 0.04879418  | 2.70581010  | 0.81405171  |
| H | -0.88407310 | 2.66218788  | 2.29392644  |
| H | 1.75781685  | 2.60664755  | 2.39150861  |
| H | 0.80677320  | 1.64155675  | 3.53125706  |
| H | 1.89190439  | 0.57210816  | 0.89708773  |
| H | -2.27140574 | 4.21398053  | -2.08927408 |
| H | -4.41067445 | 5.47735372  | -0.33378259 |
| H | -1.87906814 | 4.03810299  | 0.56058218  |
| H | -2.51041666 | 7.00183094  | 0.75610762  |
| H | -0.60816528 | 7.21090670  | -0.80148109 |
| H | -6.01638837 | 4.08815241  | -0.35576356 |
| H | -4.22026523 | 1.42845669  | -2.13831523 |
| H | -6.57193596 | 0.07955161  | -0.73118388 |
| H | -3.92537122 | 1.08289172  | 0.38532689  |
| H | -6.78397305 | 2.05430969  | 0.79699656  |
| H | -6.47151066 | -1.72563805 | -1.84227257 |
| H | -6.09215062 | -3.90797744 | -0.70551987 |
| H | -3.49276238 | -2.61622221 | 0.21406787  |
| H | -4.03154367 | -4.94493286 | -1.68357191 |
| H | -2.84003881 | -2.18988825 | -2.23672013 |
| H | -2.55122774 | -6.36926264 | -1.55229508 |
| H | 0.20971125  | -4.01482229 | -2.17489755 |
| H | 1.52922223  | -6.51000277 | -1.03228053 |
| H | -0.11918516 | -4.37315775 | 0.40984495  |
| H | -0.76754737 | -7.29522031 | -0.14274527 |
| H | 3.50020570  | -6.11860424 | -0.20525321 |
| H | 5.06897774  | -4.56884407 | 0.95212642  |
| H | 2.94252499  | -2.51367364 | 0.22786269  |
| H | 5.90172130  | -2.78041188 | -0.49463466 |
| H | 3.46871065  | -3.12606804 | -2.29012811 |
| H | 6.76702841  | -1.06401835 | -1.44645237 |
| H | 6.83894361  | 1.22898053  | -0.31724971 |
| H | 3.85195778  | 0.64546268  | -0.18932178 |
| H | 5.57758784  | 2.80078973  | -1.46622818 |

|   |             |             |             |
|---|-------------|-------------|-------------|
| H | 3.75345240  | 0.66564194  | -2.67263056 |
| H | 4.69075307  | 4.49820015  | -2.19372912 |
| H | 1.10442996  | 3.61033013  | -2.36706854 |
| H | 1.25771064  | 6.50095595  | -1.40354281 |
| H | 1.84260351  | 3.89403252  | 0.07854000  |
| H | 3.63766620  | 6.21819747  | -0.71606189 |
| H | 0.91300003  | 4.62402330  | -4.58047986 |
| H | -0.35647194 | 5.29086092  | -3.52785977 |
| H | 4.92874068  | 1.25705445  | -4.76668167 |
| H | 4.04624726  | 2.64259222  | -4.09462121 |
| H | 5.13502926  | -4.11663776 | -3.83681113 |
| H | 5.50556794  | -2.42361490 | -3.45476922 |
| H | 0.71762956  | -5.04148810 | -4.32710718 |
| H | 2.21461341  | -4.96416832 | -3.37177496 |
| H | -3.11272138 | -2.82205712 | -4.58204477 |
| H | -2.12208136 | -4.05010086 | -3.76066999 |
| H | -5.46658204 | -0.08328422 | -3.59182575 |
| H | -5.80126056 | 1.60435815  | -4.03017808 |
| H | -4.57448549 | 4.48513190  | -3.01964937 |
| H | -3.37345748 | 5.48409814  | -3.86976055 |
| H | 5.36295294  | 6.48378680  | 0.80934369  |
| H | 6.06032666  | 5.42225797  | -0.44655604 |
| H | 7.98956132  | 0.60101230  | 1.64768198  |
| H | 8.06637189  | -0.82248762 | 0.56722142  |
| H | 3.95930485  | -4.77881850 | 3.90538639  |
| H | 4.97967936  | -5.52844449 | 2.66030183  |
| H | -1.36735885 | -7.42934940 | 2.55927362  |
| H | -2.22266813 | -8.19362458 | 1.18726580  |
| H | -7.65738110 | -3.74794051 | 1.09018977  |
| H | -7.99194181 | -2.42686292 | -0.06539996 |
| H | -6.25328965 | 1.94547866  | 3.45021008  |
| H | -7.14350623 | 3.24422035  | 2.60375622  |
| H | -1.83498773 | 6.51896451  | 3.42793885  |
| H | -1.51384346 | 7.97613726  | 2.44197790  |
| H | -4.65800772 | 3.68897685  | 4.30082094  |
| H | -7.50369317 | -2.03519374 | 2.90810810  |
| H | -3.52203434 | -6.28256189 | 3.16517621  |
| H | 2.24565301  | -6.49804124 | 3.59466833  |
| H | 7.00315389  | -0.88018890 | 3.41738433  |
| H | 6.00896311  | 4.77860554  | 2.52446640  |
| H | 0.64079184  | 6.30254979  | 3.78885323  |
| H | -6.63216568 | 3.05163494  | 5.69220192  |
| H | -7.60300790 | 4.30046774  | 4.87878310  |
| H | -6.23205605 | 4.77197033  | 5.88934881  |
| H | -0.72580441 | 7.57572973  | 5.44957156  |
| H | -0.47868658 | 9.06233573  | 4.50565141  |
| H | 0.89989096  | 8.27401222  | 5.28052573  |
| H | 7.51834256  | 6.70105451  | 2.04904928  |
| H | 8.29448422  | 5.77607252  | 0.74310378  |
| H | 8.45405315  | 5.23938075  | 2.41992494  |
| H | 9.47152853  | -0.51058734 | 3.35974274  |
| H | 9.65019438  | -1.89792339 | 2.26101220  |
| H | 9.07725430  | -2.15162389 | 3.91330171  |
| H | 4.19036185  | -7.03668773 | 5.10259428  |
| H | 5.01678683  | -7.78896695 | 3.71948213  |
| H | 3.50979157  | -8.48251342 | 4.33005529  |
| H | -2.96879344 | -8.48353487 | 4.21451351  |
| H | -3.77328187 | -9.32035702 | 2.86625966  |

|   |              |             |             |
|---|--------------|-------------|-------------|
| H | -4.71849169  | -8.30589959 | 3.96165243  |
| H | -9.67292457  | -3.18854376 | 2.48401772  |
| H | -10.10115481 | -1.94645047 | 1.28457950  |
| H | -9.93418790  | -1.50624511 | 2.98848900  |
| H | 0.79873354   | 5.66489158  | 1.26457060  |
| H | 4.30844796   | 3.04580655  | 0.80278626  |
| H | 6.81177707   | 2.19594230  | -3.84331332 |
| H | 5.08909005   | -1.35311886 | 1.25144270  |
| H | 6.73452717   | -4.66186299 | -2.27684481 |
| H | 1.56101502   | -5.23715428 | 1.63381749  |
| H | -3.21104307  | -4.85944253 | 0.97621355  |
| H | -4.87843697  | -4.28746448 | -4.23000851 |
| H | -7.75273066  | 1.35240241  | -2.79991365 |
| H | -5.27932111  | -0.88013490 | 1.25179817  |
| H | -3.81940191  | 3.90981807  | 1.87753633  |
| H | -4.12575660  | 7.21676982  | -2.54055742 |
| H | 2.08230974   | 6.55680030  | -4.09729070 |
| H | 0.57932316   | -7.23291925 | -3.58221042 |
| H | -4.87969515  | 5.33723732  | 2.83559447  |
| H | 1.50061416   | 7.40041059  | 2.06052639  |
| H | 6.23333612   | 2.92223830  | 1.33625558  |
| H | 6.15308587   | -2.58899373 | 2.30033323  |
| H | 2.23603574   | -7.18008856 | 1.60953317  |
| H | -4.65599821  | -6.25787971 | 1.27777580  |
| H | -7.04566306  | -0.17472123 | 1.79793961  |

255

2-HP-B-CD:trans-(1R,4S)-SRT\_4\_Cl E(Ha)= -7253.8825483445

|    |             |             |             |
|----|-------------|-------------|-------------|
| Cl | 0.57358200  | 13.66004009 | 2.80669275  |
| Cl | 1.58145683  | 10.63367024 | 2.68691850  |
| O  | -2.35208435 | 3.94351193  | -1.45407248 |
| O  | -4.15707692 | 0.92510284  | -0.44026010 |
| O  | -5.66123438 | -0.03758220 | -1.90712861 |
| O  | -4.75328778 | -3.41127319 | -0.81468110 |
| O  | -4.83979552 | -5.14740701 | -2.34459028 |
| O  | -1.73884393 | -6.58196317 | -1.03105252 |
| O  | -0.32406452 | -7.69963581 | -2.48529864 |
| O  | 2.61918200  | -6.20213915 | -0.90520635 |
| O  | 4.45726543  | -5.72420748 | -2.23099176 |
| O  | 4.99210746  | -2.57026086 | -0.45767089 |
| O  | 6.09897176  | -0.85539177 | -1.55510827 |
| O  | 3.54238171  | 1.54420687  | -0.48588840 |
| O  | 2.74969954  | 3.06524824  | -2.02910712 |
| O  | 3.93190468  | 3.53475595  | 1.37911871  |
| O  | 1.18245152  | 4.30360715  | 1.56741303  |
| O  | -0.49427745 | 3.09136994  | -0.36346189 |
| O  | 4.77174189  | 0.82310582  | 1.97634440  |
| O  | 6.03420312  | -1.70535870 | 1.98702099  |
| O  | 6.14140863  | 1.69319121  | -2.84830739 |
| O  | 5.53612163  | -4.47349552 | 1.55256831  |
| O  | 4.20189384  | -6.99796840 | 1.14491325  |
| O  | 6.34910188  | -4.21288828 | -3.49009849 |
| O  | -1.22855046 | -8.35846482 | 0.95183385  |
| O  | 1.59410196  | -7.84664393 | 1.17295075  |
| O  | -3.51212961 | -6.88237596 | 1.17037295  |
| O  | -5.69186111 | -5.00588710 | 1.16495566  |
| O  | -3.90558547 | -7.20529496 | -3.92105730 |
| O  | -6.79957121 | -1.99070633 | -3.49572766 |
| O  | -5.82460054 | 0.54760422  | 1.65480476  |
| O  | -5.93036858 | -2.32437376 | 1.53647450  |
| O  | -3.75747205 | 2.26193057  | 2.06864167  |
| O  | -1.57094809 | 4.07310850  | 2.10008052  |
| O  | -4.91681885 | 3.69791031  | -2.64508087 |
| O  | 0.95246713  | 4.29730240  | -3.57447426 |
| O  | 1.98730342  | -8.18414048 | -3.91244565 |
| O  | -6.39717000 | 2.88459089  | 3.10729329  |
| O  | -0.42594241 | 6.55697939  | 1.41406998  |
| O  | 6.70005909  | 2.79452918  | 1.77611374  |
| O  | 8.16448638  | -3.49276896 | 1.66282703  |
| O  | 3.69848975  | -9.68666136 | 1.87120738  |
| O  | -3.53671130 | -9.68264249 | 1.90895324  |
| O  | -8.07300618 | -4.09850819 | 2.38490968  |
| N  | -1.26034331 | 5.90700555  | -3.25476461 |
| C  | -1.92923771 | 6.16146898  | -4.55443287 |
| C  | -1.36943346 | 12.17577260 | -0.34959405 |
| C  | -0.90227156 | 13.03058278 | 0.64223234  |
| C  | 0.01144786  | 12.57764223 | 1.58931775  |
| C  | 0.45199151  | 11.24918205 | 1.53218396  |
| C  | -0.01902615 | 10.40044761 | 0.53659132  |
| C  | -0.93371570 | 10.85258888 | -0.41666623 |
| C  | -0.34604895 | 9.48648138  | -2.46143676 |
| C  | -0.19644961 | 8.16345446  | -2.91094771 |
| C  | 0.82540906  | 7.85264788  | -3.81748228 |
| C  | 1.67768929  | 8.83523943  | -4.30338119 |

|   |             |             |             |
|---|-------------|-------------|-------------|
| C | 1.52476536  | 10.14897717 | -3.87017937 |
| C | 0.52700575  | 10.46039725 | -2.95745084 |
| C | -1.44555693 | 9.91424558  | -1.49289877 |
| C | -2.19547145 | 8.72885575  | -0.87163985 |
| C | -2.44401090 | 7.63054247  | -1.89593739 |
| C | -1.09345885 | 7.08971927  | -2.33666930 |
| C | -2.98268550 | 2.65009049  | -1.60959983 |
| C | -3.76118891 | 2.27600489  | -0.34472304 |
| C | -2.94638525 | 2.43020320  | 0.94248862  |
| C | -2.35313784 | 3.82712145  | 0.95467903  |
| C | -1.51709203 | 4.03567497  | -0.30417033 |
| C | -5.51797109 | 0.63435967  | -0.69217488 |
| C | -5.03305898 | -1.32501682 | -1.98349063 |
| C | -5.52452507 | -2.22305809 | -0.84945745 |
| C | -5.37357206 | -1.54828249 | 0.50952582  |
| C | -6.05436352 | -0.19224438 | 0.47792140  |
| C | -5.36640563 | -4.63068899 | -1.15534445 |
| C | -5.16250891 | -5.60733355 | 0.00634127  |
| C | -3.68634198 | -5.93082748 | 0.15214320  |
| C | -3.14289195 | -6.43266065 | -1.18063250 |
| C | -3.44300185 | -5.45629022 | -2.31641669 |
| C | -1.14911930 | -7.81301261 | -1.35774506 |
| C | 0.77238798  | -6.79350385 | -2.35019857 |
| C | 1.63920850  | -7.20048832 | -1.16013039 |
| C | 0.81431590  | -7.35360975 | 0.11195038  |
| C | -0.34811836 | -8.29663539 | -0.14508420 |
| C | 3.96486467  | -6.49414235 | -1.16616111 |
| C | 4.76843304  | -6.22790122 | 0.11237486  |
| C | 4.72993012  | -4.74463430 | 0.42924090  |
| C | 5.19719682  | -3.94069967 | -0.77662151 |
| C | 4.41969192  | -4.30980329 | -2.03764369 |
| C | 6.09213862  | -1.70711886 | -0.43191642 |
| C | 6.01742048  | -0.87375983 | 0.85144654  |
| C | 4.76745367  | -0.00670070 | 0.83344683  |
| C | 4.77322843  | 0.81861807  | -0.44679434 |
| C | 4.92438943  | -0.06092272 | -1.68529751 |
| C | 3.58812391  | 2.87461243  | -0.90282056 |
| C | 1.39329674  | 2.69352430  | -1.81962882 |
| C | 0.82027740  | 3.52903433  | -0.67716448 |
| C | 1.67235632  | 3.42409288  | 0.58515306  |
| C | 3.11770898  | 3.76179126  | 0.25898137  |
| C | 0.72317916  | 2.95479701  | -3.15510913 |
| C | 5.10431853  | 0.74787689  | -2.95828252 |
| C | 5.04647496  | -3.72815596 | -3.29510768 |
| C | 1.52368446  | -6.88024948 | -3.66852407 |
| C | -3.14163558 | -6.05065835 | -3.68244895 |
| C | -5.40772174 | -1.86836815 | -3.35239335 |
| C | -3.88014657 | 2.76555499  | -2.82752745 |
| C | 4.99487077  | 4.47778954  | 1.52455092  |
| C | 7.18694409  | -1.62022132 | 2.82538051  |
| C | 5.10664359  | -7.72685286 | 1.96904436  |
| C | -1.12877444 | -9.50980309 | 1.78621315  |
| C | -6.44428911 | -5.85128637 | 2.03278586  |
| C | -6.89338550 | 0.57352259  | 2.60049677  |
| C | -1.89892062 | 5.24800346  | 2.84524381  |
| C | -6.55986916 | 1.60177428  | 3.67198494  |
| C | -7.17856286 | -4.97233618 | 3.03542656  |
| C | -2.36222412 | -9.56075752 | 2.67720791  |

|   |             |              |             |
|---|-------------|--------------|-------------|
| C | 4.31383007  | -8.77009212  | 2.74496061  |
| C | 7.87424817  | -2.97685828  | 2.94614123  |
| C | 6.08859875  | 3.89539577   | 2.40705669  |
| C | -0.80369414 | 6.31148173   | 2.76783390  |
| C | -7.67665821 | 1.67958982   | 4.69608132  |
| C | -1.27688639 | 7.60582754   | 3.40004711  |
| C | 7.15675211  | 4.94020371   | 2.67812084  |
| C | 9.16729045  | -2.84759805  | 3.73101326  |
| C | 5.22976459  | -9.55101501  | 3.66977309  |
| C | -2.29230767 | -10.75527697 | 3.61070526  |
| C | -7.98246741 | -5.82559140  | 3.99878070  |
| H | -2.98181830 | 6.38994560   | -4.38962597 |
| H | -1.43985529 | 6.99840643   | -5.05190964 |
| H | -1.84263607 | 5.26462957   | -5.16903446 |
| H | -0.33456812 | 5.45249725   | -3.41775811 |
| H | -1.78946987 | 5.18775117   | -2.72540063 |
| H | -2.08503693 | 12.54940228  | -1.07739554 |
| H | -1.24332500 | 14.05907450  | 0.69238697  |
| H | 0.33392014  | 9.37315626   | 0.52712190  |
| H | 0.96911814  | 6.83227303   | -4.16592884 |
| H | 2.45680791  | 8.57554986   | -5.01317704 |
| H | 2.18509945  | 10.92785177  | -4.23858338 |
| H | 0.41978831  | 11.48330667  | -2.60754916 |
| H | -2.17090882 | 10.48293297  | -2.09297232 |
| H | -1.62286220 | 8.30650377   | -0.03725092 |
| H | -3.14273834 | 9.08447101   | -0.45557274 |
| H | -3.04187792 | 6.82421148   | -1.45273549 |
| H | -2.99786276 | 8.03039797   | -2.75445392 |
| H | -0.60185138 | 6.66569905   | -1.45111774 |
| H | -2.20970107 | 1.89090676   | -1.78367512 |
| H | -4.64118727 | 2.92946063   | -0.26658461 |
| H | -2.12944902 | 1.69300309   | 0.93230898  |
| H | -3.18103111 | 4.54807601   | 0.91400623  |
| H | -1.11930349 | 5.05444474   | -0.28654619 |
| H | -6.08761288 | 1.56476821   | -0.79298992 |
| H | -3.94238400 | -1.21454382  | -1.90422976 |
| H | -6.58360480 | -2.45642037  | -1.02428497 |
| H | -4.29924348 | -1.38565291  | 0.69122031  |
| H | -7.13372208 | -0.33520073  | 0.32820500  |
| H | -6.43536898 | -4.48081420  | -1.34123133 |
| H | -5.71319147 | -6.53044747  | -0.22323158 |
| H | -3.15950099 | -4.99803509  | 0.40728762  |
| H | -3.60644446 | -7.39874484  | -1.42200565 |
| H | -2.85711777 | -4.53867293  | -2.16371290 |
| H | -1.91664331 | -8.54823246  | -1.62216362 |
| H | 0.40089635  | -5.77100873  | -2.19158591 |
| H | 2.12408222  | -8.15720604  | -1.39614984 |
| H | 0.39737891  | -6.36831181  | 0.37205029  |
| H | 0.04338811  | -9.29830685  | -0.37171602 |
| H | 4.08020097  | -7.53793678  | -1.47689429 |
| H | 5.80804596  | -6.53665220  | -0.06573041 |
| H | 3.68460754  | -4.47432194  | 0.63961663  |
| H | 6.26231922  | -4.13345305  | -0.96454847 |
| H | 3.37964892  | -3.96868369  | -1.93415612 |
| H | 7.03603075  | -2.26081758  | -0.45709812 |
| H | 6.89252517  | -0.21008510  | 0.85854758  |
| H | 3.88213881  | -0.65894398  | 0.84198959  |
| H | 5.61243029  | 1.52422639   | -0.40156298 |

|   |             |              |             |
|---|-------------|--------------|-------------|
| H | 4.03839826  | -0.70569264  | -1.78097857 |
| H | 4.59285831  | 3.14723333   | -1.24202674 |
| H | 1.31632149  | 1.62724987   | -1.56953717 |
| H | 0.80235550  | 4.58282013   | -0.99478761 |
| H | 1.63187761  | 2.38632363   | 0.94444830  |
| H | 3.17049150  | 4.81632338   | -0.05105321 |
| H | 1.11373279  | 2.25889478   | -3.90652592 |
| H | -0.35747172 | 2.81507588   | -3.07318529 |
| H | 5.27483535  | 0.04920666   | -3.79031885 |
| H | 4.18757972  | 1.30751211   | -3.16543943 |
| H | 4.39218903  | -3.95316332  | -4.15165659 |
| H | 5.12153557  | -2.64195445  | -3.19246735 |
| H | 0.86299446  | -6.52343183  | -4.47361679 |
| H | 2.40179868  | -6.22951247  | -3.62855494 |
| H | -3.31523091 | -5.27927081  | -4.44875616 |
| H | -2.08963864 | -6.34694751  | -3.72311872 |
| H | -4.98280685 | -2.86921647  | -3.46978175 |
| H | -4.97192354 | -1.21446049  | -4.12409314 |
| H | -4.34984941 | 1.79552683   | -3.01374327 |
| H | -3.25764385 | 3.01124912   | -3.70561769 |
| H | 4.59173193  | 5.40594946   | 1.95391558  |
| H | 5.43802225  | 4.70392466   | 0.54418021  |
| H | 6.87156593  | -1.25314687  | 3.80974692  |
| H | 7.89873843  | -0.90010195  | 2.40338234  |
| H | 5.63130292  | -7.03777048  | 2.64301687  |
| H | 5.84357215  | -8.24456521  | 1.33852558  |
| H | -0.20653941 | -9.46024151  | 2.37797404  |
| H | -1.10766862 | -10.41426502 | 1.16157596  |
| H | -5.77344445 | -6.55895361  | 2.53427165  |
| H | -7.18488567 | -6.41134058  | 1.44410954  |
| H | -7.02988002 | -0.42505212  | 3.03196535  |
| H | -7.81953738 | 0.87770877   | 2.09200183  |
| H | -2.05656739 | 4.94774686   | 3.88685200  |
| H | -2.84139586 | 5.66699704   | 2.47161790  |
| H | -5.63139042 | 1.28052044   | 4.17321095  |
| H | -6.42255146 | -4.40189003  | 3.60171971  |
| H | -2.38435682 | -8.63437496  | 3.27625258  |
| H | 3.55764792  | -8.23963582  | 3.34830682  |
| H | 7.19585615  | -3.66129500  | 3.47873340  |
| H | 5.62773829  | 3.59153546   | 3.36098753  |
| H | 0.07632894  | 5.94398510   | 3.31411806  |
| H | -7.85127522 | 0.71087020   | 5.17289804  |
| H | -8.60492526 | 2.00861852   | 4.21847009  |
| H | -7.41844741 | 2.40814439   | 5.46765017  |
| H | -1.59549625 | 7.44694847   | 4.43472796  |
| H | -2.12361768 | 8.01818476   | 2.84105260  |
| H | -0.47228177 | 8.34463402   | 3.39758655  |
| H | 6.74594928  | 5.81737463   | 3.18661856  |
| H | 7.62093636  | 5.26137065   | 1.73998712  |
| H | 7.93815114  | 4.50689655   | 3.30580361  |
| H | 8.99567544  | -2.41550218  | 4.72193650  |
| H | 9.87391531  | -2.21041736  | 3.18966432  |
| H | 9.62753436  | -3.83025225  | 3.85510705  |
| H | 5.73453182  | -8.89451141  | 4.38462967  |
| H | 5.98651988  | -10.08671852 | 3.08792137  |
| H | 4.64748921  | -10.29056745 | 4.22361867  |
| H | -1.40277344 | -10.71661522 | 4.24614355  |
| H | -2.27235714 | -11.68496036 | 3.03329627  |

|   |             |              |             |
|---|-------------|--------------|-------------|
| H | -3.17876126 | -10.77538305 | 4.24841118  |
| H | -7.34211785 | -6.52217318  | 4.54746141  |
| H | -8.74002814 | -6.39817078  | 3.45447356  |
| H | -8.49805842 | -5.18348163  | 4.71625266  |
| H | 0.31510570  | 3.96516812   | 1.86301549  |
| H | 4.15372149  | 1.55554752   | 1.81379592  |
| H | 6.94978569  | 1.20057687   | -2.66308972 |
| H | 5.44362637  | -3.52158330  | 1.75106673  |
| H | 6.27626878  | -5.17412261  | -3.52582898 |
| H | 2.39698204  | -7.29246819  | 1.22415167  |
| H | -2.57586109 | -7.16400628  | 1.14877564  |
| H | -4.82970216 | -6.94093983  | -3.84273022 |
| H | -7.16964286 | -1.11245068  | -3.35015870 |
| H | -5.57651335 | -3.23247514  | 1.44374864  |
| H | -4.28657700 | 1.44826704   | 1.93686632  |
| H | -4.52487623 | 4.50565556   | -2.29659856 |
| H | 1.89916565  | 4.45632449   | -3.44695890 |
| H | 1.20910348  | -8.75389058  | -3.90928644 |
| H | -5.52554213 | 2.91140028   | 2.68963302  |
| H | 0.33819758  | 5.97601534   | 1.26087473  |
| H | 6.14199980  | 2.01415969   | 1.94025964  |
| H | 7.41377329  | -4.05925941  | 1.42801041  |
| H | 2.91916836  | -9.25879101  | 1.48774374  |
| H | -3.72716784 | -8.82050290  | 1.51318266  |
| H | -7.55420454 | -3.39901639  | 1.96466502  |



2-HP-B-CD:trans-(1R,4S)-SRT\_5\_Cl E(Ha)= -7253.8574775220

|    |             |             |             |
|----|-------------|-------------|-------------|
| Cl | 2.27621471  | -0.00996641 | -2.18684390 |
| Cl | 0.38771850  | -1.67367586 | -0.20853690 |
| O  | -4.52737801 | -4.34143434 | 2.52403206  |
| O  | -5.61829665 | 0.69449969  | 2.73743422  |
| O  | -2.84002611 | 3.05113019  | 2.34612063  |
| O  | -2.05969920 | 4.24467584  | 4.16383827  |
| O  | 1.22074648  | 4.45794339  | 2.56707147  |
| O  | 3.14306236  | 4.57558456  | 3.85844997  |
| O  | 4.67254738  | 2.03215037  | 1.72213452  |
| O  | 6.31828512  | 0.61967207  | 2.54027069  |
| O  | 4.75945690  | -2.29306563 | 0.95149639  |
| O  | 4.85165938  | -4.33040453 | 2.04615429  |
| O  | 1.52542084  | -5.27730471 | 0.84509099  |
| O  | 0.15290555  | -6.48314576 | 2.26964506  |
| O  | 0.81005974  | -6.79207905 | -1.27309215 |
| O  | -2.01146513 | -6.19963039 | -1.23201581 |
| O  | -2.80140404 | -4.71791198 | 1.02883655  |
| O  | 3.03881530  | -5.20965637 | -1.55661736 |
| O  | 5.30498860  | -3.43263358 | -1.42370442 |
| O  | 3.84029906  | -6.59427466 | 3.29621882  |
| O  | 5.45221148  | -0.71464897 | -1.29448120 |
| O  | 5.85133863  | 2.06074258  | -0.74545717 |
| O  | 7.46507987  | -1.79332604 | 3.30604721  |
| O  | 2.33644231  | 6.07440340  | 0.66576462  |
| O  | 4.37041354  | 4.20550073  | -0.07973983 |
| O  | -0.35476370 | 6.04509908  | 0.85947671  |
| O  | -3.11508915 | 5.36195558  | 0.86068375  |
| O  | -0.18551691 | 5.29931036  | 5.87505877  |
| O  | -5.62415602 | 2.90073528  | 4.50469177  |
| O  | -5.38166941 | 0.60818145  | -0.90465982 |
| O  | -3.82215333 | 2.89705598  | -0.28596734 |
| O  | -5.45260194 | -2.27072012 | -0.94091340 |
| O  | -4.62496488 | -5.00724711 | -1.05299898 |
| O  | -6.23101834 | -2.86062849 | 4.05226931  |
| O  | -2.05332903 | -7.04054876 | 3.80305998  |
| O  | 5.56824169  | 3.78327621  | 4.86989419  |
| O  | -7.82553467 | -0.79811925 | -0.95559781 |
| O  | -4.25416116 | -7.81142102 | -0.86030926 |
| O  | 3.06317569  | -7.89892026 | -2.57262874 |
| O  | 7.35200919  | -2.17553571 | -2.90762566 |
| O  | 6.72039730  | 4.59597978  | -1.71807956 |
| O  | 0.93011706  | 7.98025260  | -1.05505189 |
| O  | -5.81488475 | 4.82118030  | -0.17680524 |
| O  | -4.62408057 | -0.87589080 | 1.34113492  |
| N  | -2.07415064 | 5.29122858  | -7.16546816 |
| C  | -1.40118362 | 4.16325530  | -6.37040462 |
| C  | -2.15080064 | 2.86066740  | -6.60017961 |
| C  | -1.64776095 | 1.81537031  | -5.61305435 |
| C  | -1.99986959 | 2.21951247  | -4.17779075 |
| C  | -1.58289485 | 4.12272885  | -2.57604371 |
| C  | -1.18938997 | 5.41539164  | -2.26132834 |
| C  | -0.79001449 | 6.28722924  | -3.27582493 |
| C  | -0.84355469 | 5.86014595  | -4.59402136 |
| C  | -1.29372666 | 4.57097787  | -4.92190859 |
| C  | -1.62224058 | 3.66841461  | -3.89891726 |
| C  | -1.39109863 | 1.26094778  | -3.17029526 |

|   |             |             |             |
|---|-------------|-------------|-------------|
| C | -0.00892939 | 1.07348440  | -3.11165817 |
| C | 0.56026271  | 0.17936353  | -2.20908802 |
| C | -0.26559668 | -0.54121527 | -1.33730144 |
| C | -1.64210995 | -0.34159700 | -1.37731049 |
| C | -2.20122673 | 0.55013624  | -2.28522637 |
| C | -3.45394780 | 5.67904652  | -6.75126284 |
| C | -4.30974594 | -2.93099885 | 2.58924332  |
| C | -5.02109380 | -2.24085597 | 1.42707553  |
| C | -4.69395304 | -2.87727760 | 0.08153121  |
| C | -4.97124650 | -4.36520194 | 0.15232162  |
| C | -4.15261772 | -4.94720277 | 1.31323093  |
| C | -5.61416804 | 0.10889158  | 1.46145458  |
| C | -4.40199167 | 1.34763772  | 3.10045559  |
| C | -4.09330540 | 2.44171799  | 2.08102632  |
| C | -4.03310497 | 1.87235135  | 0.66957304  |
| C | -5.35634080 | 1.17666827  | 0.39315263  |
| C | -2.84996838 | 4.29396038  | 3.01375809  |
| C | -2.32819375 | 5.35859414  | 2.03782441  |
| C | -0.88971358 | 5.04089775  | 1.68594632  |
| C | -0.06457643 | 4.91226787  | 2.96266690  |
| C | -0.68170638 | 3.92477120  | 3.95011980  |
| C | 2.35913821  | 5.21296267  | 2.89098181  |
| C | 3.64124241  | 3.28137197  | 3.50068310  |
| C | 4.41691002  | 3.34906702  | 2.18565581  |
| C | 3.61863112  | 4.05812069  | 1.09808720  |
| C | 3.16486383  | 5.41572442  | 1.60328224  |
| C | 5.99883352  | 1.59426129  | 1.58708505  |
| C | 6.17225645  | 1.03728309  | 0.17010004  |
| C | 5.28838778  | -0.18576712 | 0.00035097  |
| C | 5.65240135  | -1.19813250 | 1.07877566  |
| C | 5.54295562  | -0.58142831 | 2.47338284  |
| C | 5.29503806  | -3.59271350 | 0.94195949  |
| C | 4.88483959  | -4.26922945 | -0.36996952 |
| C | 3.38241569  | -4.48928628 | -0.39660608 |
| C | 2.94578806  | -5.22385227 | 0.86388358  |
| C | 3.43614800  | -4.51546896 | 2.12431136  |
| C | 0.90130751  | -6.51165908 | 1.08550719  |
| C | -0.90859821 | -5.52731963 | 2.30538085  |
| C | -1.86664079 | -5.78107060 | 1.14363153  |
| C | -1.13180087 | -5.84008302 | -0.18872407 |
| C | 0.00782777  | -6.83865628 | -0.11647936 |
| C | -1.57346745 | -5.72834197 | 3.65767739  |
| C | 3.20738104  | -5.34121587 | 3.37888414  |
| C | 6.11426956  | -1.48781237 | 3.55071745  |
| C | 4.52691658  | 2.86284705  | 4.66327082  |
| C | -0.03521535 | 4.01556810  | 5.32301011  |
| C | -4.62701725 | 1.90673445  | 4.49458702  |
| C | -4.87546477 | -2.51301422 | 3.93774670  |
| C | 0.67804146  | -7.87969885 | -2.18150568 |
| C | 5.89367220  | -4.07607453 | -2.54957376 |
| C | 6.69319273  | 2.17860441  | -1.88910194 |
| C | 2.99939635  | 6.95896495  | -0.23608032 |
| C | -4.20473097 | 6.28160049  | 0.90159311  |
| C | -6.45372429 | 1.01812398  | -1.75393661 |
| C | -5.58274175 | -5.93355541 | -1.56213846 |
| C | -7.35804244 | -0.15598138 | -2.12188652 |
| C | -5.12941724 | 6.04689295  | -0.28400459 |
| C | 2.08171468  | 7.23889669  | -1.41382217 |

|   |             |             |             |
|---|-------------|-------------|-------------|
| C | 6.39810644  | 3.51276665  | -2.55956936 |
| C | 6.38034776  | -2.99868279 | -3.50863083 |
| C | 1.80763827  | -7.79166701 | -3.19869292 |
| C | -4.90523178 | -7.23477008 | -1.97135854 |
| C | -8.54891822 | 0.32946492  | -2.93015103 |
| C | -5.92947479 | -8.22118589 | -2.50434827 |
| C | 1.69708047  | -8.91581087 | -4.21260915 |
| C | 7.00631491  | -3.62808292 | -4.73949388 |
| C | 7.21711584  | 3.66196067  | -3.82833516 |
| C | 2.81213334  | 8.04870817  | -2.46920822 |
| C | -6.17193881 | 7.14853376  | -0.36145920 |
| H | -2.01675069 | 2.52351159  | -7.63492096 |
| H | -2.08893909 | 0.84128450  | -5.84166293 |
| H | -0.56224866 | 1.69834399  | -5.71793903 |
| H | -3.09173410 | 2.13853560  | -4.07004782 |
| H | -1.87048512 | 3.43559090  | -1.78564111 |
| H | -1.15862193 | 5.73499777  | -1.22222367 |
| H | -0.42341858 | 7.27598023  | -3.01383224 |
| H | -0.49730017 | 6.54597631  | -5.36983522 |
| H | 0.65732578  | 1.63363749  | -3.76107178 |
| H | -2.27632123 | -0.88445497 | -0.68423804 |
| H | -3.27666070 | 0.70378334  | -2.26981887 |
| H | -2.07455112 | 5.02949761  | -8.15476965 |
| H | -3.74608415 | 6.56776693  | -7.31152397 |
| H | -3.44056950 | 5.88988814  | -5.68238646 |
| H | -4.14053920 | 4.86391941  | -6.97044599 |
| H | -1.47644938 | 6.11684829  | -7.08657280 |
| H | -0.40586284 | 4.10005305  | -6.83120976 |
| H | -3.22565021 | 3.00168858  | -6.43396055 |
| H | -0.85258609 | -5.46507736 | 4.44675505  |
| H | 3.90260372  | 2.74145638  | 5.56133347  |
| H | 1.65039762  | -7.29759562 | 1.22843266  |
| H | -0.40033573 | -7.84925210 | 0.02419533  |
| H | -0.69927718 | -4.84793413 | -0.38606741 |
| H | -2.74484788 | -5.55524171 | -1.22845519 |
| H | -2.38799468 | -6.73036479 | 1.32758438  |
| H | -0.50465158 | -4.50813525 | 2.22518897  |
| H | -2.43600575 | -5.06125202 | 3.74086579  |
| H | 6.38628082  | -3.55636878 | 1.02801012  |
| H | 5.39431735  | -5.24114917 | -0.43071696 |
| H | 2.89740765  | -3.50120299 | -0.40785756 |
| H | 2.10619915  | -5.48263673 | -1.46293464 |
| H | 3.36346183  | -6.23944855 | 0.85371167  |
| H | 2.93249501  | -3.54269736 | 2.21483077  |
| H | 3.55618953  | -4.76297313 | 4.24785764  |
| H | 2.13686956  | -5.52989777 | 3.49816413  |
| H | 4.77996400  | -6.41783118 | 3.17053583  |
| H | 6.69682020  | 2.42135885  | 1.75814583  |
| H | 7.22472313  | 0.74572064  | 0.04595404  |
| H | 4.24249204  | 0.12126744  | 0.14829214  |
| H | 5.10181758  | -1.62807493 | -1.28413386 |
| H | 6.68752925  | -1.53355895 | 0.92819062  |
| H | 4.48689529  | -0.36192434 | 2.68529120  |
| H | 5.97512829  | -1.00267305 | 4.52855621  |
| H | 5.56618660  | -2.43411475 | 3.55498068  |
| H | 7.93700160  | -0.95260023 | 3.29411852  |
| H | 2.07175566  | 6.17769671  | 3.32379630  |
| H | 4.03634621  | 6.04254514  | 1.83859853  |

|   |             |             |             |
|---|-------------|-------------|-------------|
| H | 2.71666113  | 3.46138342  | 0.89592422  |
| H | 4.68325630  | 3.31247314  | -0.33238399 |
| H | 5.35932326  | 3.88541526  | 2.36261396  |
| H | 2.80634122  | 2.57672982  | 3.38248546  |
| H | 4.98974485  | 1.89910005  | 4.43198086  |
| H | -3.86287146 | 4.52626834  | 3.36134559  |
| H | -2.36858965 | 6.34510510  | 2.52024632  |
| H | -0.86801324 | 4.06540242  | 1.17425855  |
| H | 0.60711362  | 5.86820180  | 0.79570313  |
| H | 0.00677271  | 5.89363128  | 3.45106254  |
| H | -0.58925234 | 2.90653740  | 3.54872354  |
| H | -0.46661129 | 3.23721218  | 5.96985494  |
| H | 1.03852749  | 3.82981938  | 5.22868538  |
| H | -1.13435843 | 5.45636130  | 5.94311244  |
| H | -6.61267004 | -0.31573331 | 1.31680725  |
| H | -6.15741277 | 1.92177811  | 0.48175961  |
| H | -3.21382735 | 1.14278460  | 0.61062245  |
| H | -3.31572842 | 3.60529502  | 0.15840676  |
| H | -4.89418008 | 3.19284823  | 2.11992015  |
| H | -3.57191437 | 0.62663343  | 3.11814819  |
| H | -3.70423012 | 2.37378510  | 4.85061648  |
| H | -4.87327320 | 1.07487981  | 5.17022109  |
| H | -6.43808549 | 2.47973902  | 4.20443286  |
| H | -4.35606127 | -6.01768056 | 1.42413010  |
| H | -6.03603241 | -4.51871901 | 0.37271299  |
| H | -3.62074236 | -2.74517839 | -0.11816446 |
| H | -5.20354541 | -1.32755485 | -0.94305670 |
| H | -6.10255396 | -2.30841077 | 1.60912354  |
| H | -3.23444322 | -2.70914861 | 2.53714481  |
| H | -4.81415653 | -1.42594170 | 4.03609073  |
| H | -4.26609104 | -2.96882792 | 4.73280296  |
| H | -6.27366306 | -3.81671514 | 3.93187954  |
| H | -1.29148616 | -7.62167646 | 3.69347782  |
| H | 5.14748162  | 4.63126397  | 5.05282081  |
| H | -6.02038251 | 1.46434200  | -2.65929886 |
| H | -7.04975574 | 1.79012090  | -1.25279024 |
| H | -3.80509793 | 7.30551810  | 0.88161310  |
| H | -4.78668566 | 6.15042830  | 1.82502338  |
| H | 3.91821922  | 6.48705296  | -0.59704593 |
| H | 3.24469962  | 7.89922947  | 0.27925533  |
| H | 6.51378786  | 1.33802762  | -2.57022309 |
| H | 7.74636369  | 2.16687022  | -1.57396356 |
| H | 5.15737322  | -4.73063650 | -3.03160125 |
| H | -0.30337476 | -7.83817552 | -2.67141306 |
| H | 0.76798344  | -8.83000770 | -1.63558647 |
| H | -6.10275039 | -5.47484105 | -2.41387365 |
| H | -6.32481739 | -6.16839873 | -0.78838349 |
| H | -6.77338920 | -0.86462944 | -2.72884919 |
| H | -4.17442265 | -7.00858504 | -2.76433905 |
| H | 1.71390322  | -6.82345494 | -3.72028552 |
| H | 5.50149081  | -2.40357090 | -3.81252386 |
| H | 5.32399988  | 3.52687974  | -2.81581218 |
| H | 1.79429930  | 6.26057841  | -1.83485135 |
| H | -4.50697667 | 6.06848883  | -1.19589881 |
| H | 6.99644094  | 2.86438068  | -4.54359138 |
| H | 8.28563523  | 3.63658116  | -3.59314573 |
| H | 7.00049918  | 4.62550146  | -4.29546098 |
| H | 3.68975262  | 7.51376803  | -2.84224439 |

|   |             |             |             |
|---|-------------|-------------|-------------|
| H | 3.13273895  | 9.01034533  | -2.05719321 |
| H | 2.14458438  | 8.25358892  | -3.31048913 |
| H | -5.71206501 | 8.13199527  | -0.49452213 |
| H | -6.77582440 | 7.16386942  | 0.55129881  |
| H | -6.84412463 | 6.95759175  | -1.20109429 |
| H | -8.23487844 | 0.86945846  | -3.82956930 |
| H | -9.16932539 | 0.99543584  | -2.32218919 |
| H | -9.16447307 | -0.52047030 | -3.23243987 |
| H | -6.47965245 | -7.81196585 | -3.35738246 |
| H | -6.64556460 | -8.48271217 | -1.71867406 |
| H | -5.42911327 | -9.13933595 | -2.81970864 |
| H | 0.74336156  | -8.88306089 | -4.74766449 |
| H | 1.78722801  | -9.88527390 | -3.71244380 |
| H | 2.50962958  | -8.83660168 | -4.93817222 |
| H | 6.29580589  | -4.27156076 | -5.26651876 |
| H | 7.87830082  | -4.22556105 | -4.45553854 |
| H | 7.34459540  | -2.84472381 | -5.42156477 |
| H | -7.23181219 | -1.54940225 | -0.80133348 |
| H | -3.34390542 | -7.47524339 | -0.87490293 |
| H | 3.24526333  | -7.06014431 | -2.12282668 |
| H | 6.90600808  | -1.61414928 | -2.25661704 |
| H | 6.09273827  | 4.60790007  | -0.98256093 |
| H | 0.44166829  | 7.51277205  | -0.36508505 |
| H | -5.18075799 | 4.10121657  | -0.33890966 |
| H | 6.75294444  | -4.67842660 | -2.22028673 |

2-HP-B-CD:trans-(1R,4S)-SRT\_6\_Cl E(Ha)= -7253.8406217591

|    |             |             |             |
|----|-------------|-------------|-------------|
| Cl | 0.45557548  | 1.51923072  | 1.20860086  |
| Cl | 0.51273018  | -1.58228405 | 0.50029885  |
| O  | -5.28730850 | -2.47154254 | -1.28994600 |
| O  | -2.47194097 | -4.27631666 | 0.19258438  |
| O  | -1.33272734 | -5.78992386 | -1.13126179 |
| O  | 1.84192444  | -4.70131771 | 0.31334810  |
| O  | 3.76924517  | -4.86939609 | -0.95200940 |
| O  | 4.64755098  | -1.41815566 | -0.08080072 |
| O  | 5.67994709  | -0.10752516 | -1.68799448 |
| O  | 4.04962337  | 2.99395654  | -0.62839212 |
| O  | 3.72272113  | 4.70763797  | -2.16076710 |
| O  | 0.35320490  | 5.27421331  | -0.83626317 |
| O  | -1.38496420 | 6.04020006  | -2.16896362 |
| O  | -3.66884059 | 3.69873716  | -0.52216874 |
| O  | -5.35288296 | 2.68155598  | -1.73537005 |
| O  | -5.25892385 | 3.90611959  | 1.66676970  |
| O  | -5.75884466 | 1.10463595  | 2.05927846  |
| O  | -4.85875037 | -0.54695340 | -0.07427916 |
| O  | -3.05225499 | 5.52941113  | 1.58921140  |
| O  | -0.53466895 | 6.83936764  | 1.25226227  |
| O  | -3.87152146 | 6.06677287  | -3.38952644 |
| O  | 2.05236034  | 6.07866056  | 1.36141507  |
| O  | 4.60569899  | 4.81194979  | 1.34032724  |
| O  | 2.30277567  | 6.47828386  | -3.72302481 |
| O  | 6.26504718  | -0.46789518 | 1.86248832  |
| O  | 5.60047302  | 2.30946068  | 1.66768872  |
| O  | 4.87430718  | -2.76341277 | 2.43441067  |
| O  | 3.29054672  | -5.11740348 | 2.64435067  |
| O  | 5.91645653  | -3.93228527 | -2.41849583 |
| O  | 0.66969657  | -6.83896124 | -2.59389100 |
| O  | -2.29537725 | -5.89312391 | 2.35217446  |
| O  | 0.59341486  | -5.95302618 | 2.52038504  |
| O  | -4.19158145 | -3.89753771 | 2.42696484  |
| O  | -5.94274219 | -1.62930296 | 2.16567025  |
| O  | -4.76806340 | -4.79611620 | -2.63987127 |
| O  | -6.70200706 | 0.63662650  | -2.98715045 |
| O  | 6.10237437  | 1.91940783  | -3.46370565 |
| O  | -4.83128344 | -6.56350004 | 3.36921297  |
| O  | -8.14325062 | -0.13123335 | 3.10534079  |
| O  | -5.58707147 | 6.59124457  | 2.48214168  |
| O  | 1.34256021  | 8.78047084  | 2.08163220  |
| O  | 7.23785709  | 4.58418974  | 2.34929727  |
| O  | 7.63636250  | -2.52839269 | 3.21669555  |
| O  | 2.68526522  | -7.84929231 | 2.62406030  |
| N  | -1.68476366 | -3.77206810 | -6.94664914 |
| C  | -1.35415037 | -3.15772648 | -8.26621472 |
| C  | -0.23601336 | 1.47088823  | -2.72435428 |
| C  | -0.02321336 | 1.89327527  | -1.41555939 |
| C  | 0.20577082  | 0.96695604  | -0.40313726 |
| C  | 0.22840860  | -0.39701993 | -0.71661145 |
| C  | 0.01831874  | -0.80992689 | -2.02906207 |
| C  | -0.22396461 | 0.11428968  | -3.04674449 |
| C  | 0.43373245  | -1.38595400 | -4.98021895 |
| C  | 0.04446788  | -2.60503042 | -5.56044682 |
| C  | 1.02625229  | -3.52143018 | -5.96519782 |
| C  | 2.37663757  | -3.21865266 | -5.86823995 |

|   |             |             |             |
|---|-------------|-------------|-------------|
| C | 2.76406640  | -1.98720081 | -5.34352014 |
| C | 1.80048614  | -1.09787319 | -4.89225487 |
| C | -0.55984474 | -0.36316773 | -4.44883777 |
| C | -2.00490933 | -0.87962541 | -4.47110627 |
| C | -2.30220036 | -1.68556427 | -5.72774767 |
| C | -1.42673997 | -2.92645575 | -5.70273580 |
| C | -3.96700572 | -3.00282936 | -1.21467934 |
| C | -3.82149947 | -3.86403802 | 0.03790146  |
| C | -4.20551784 | -3.07811664 | 1.28650533  |
| C | -5.59565207 | -2.48788886 | 1.10958970  |
| C | -5.67406324 | -1.67864061 | -0.19018479 |
| C | -2.14677271 | -5.62668681 | 0.00410134  |
| C | -0.07722199 | -5.10605304 | -1.07964764 |
| C | 0.71984693  | -5.54894593 | 0.14607705  |
| C | -0.10656813 | -5.42510042 | 1.42152767  |
| C | -1.43822297 | -6.13610536 | 1.26427690  |
| C | 3.13694374  | -5.23656127 | 0.24762076  |
| C | 3.92767309  | -4.71872485 | 1.45165786  |
| C | 4.06701256  | -3.20790876 | 1.37546740  |
| C | 4.67475081  | -2.83554062 | 0.02612989  |
| C | 3.91264601  | -3.45914402 | -1.14219616 |
| C | 5.82857334  | -0.75653024 | -0.45050141 |
| C | 4.72349335  | 0.95359786  | -1.72780328 |
| C | 5.07237523  | 2.00855935  | -0.67966564 |
| C | 5.19131679  | 1.37584233  | 0.70331525  |
| C | 6.20192934  | 0.24153583  | 0.64981696  |
| C | 4.36237976  | 4.31904455  | -0.97222182 |
| C | 3.93710504  | 5.23458903  | 0.17771504  |
| C | 2.42770059  | 5.18514243  | 0.34580978  |
| C | 1.75266231  | 5.51918455  | -0.98090671 |
| C | 2.29694983  | 4.66197221  | -2.12559732 |
| C | -0.55821504 | 6.32149535  | -1.07115961 |
| C | -1.40309856 | 6.54282981  | 0.18786996  |
| C | -2.23881829 | 5.30668415  | 0.46585168  |
| C | -3.07474579 | 4.96920183  | -0.76230574 |
| C | -2.23505959 | 4.90104657  | -2.03836778 |
| C | -5.05272879 | 3.55195714  | -0.67184080 |
| C | -4.86016066 | 1.35020663  | -1.58419340 |
| C | -5.43544832 | 0.73319669  | -0.31075312 |
| C | -5.13865280 | 1.60616114  | 0.90326845  |
| C | -5.63502707 | 3.01968279  | 0.64210112  |
| C | -5.30683609 | 0.62216928  | -2.84011115 |
| C | -3.09574679 | 4.90134644  | -3.29168835 |
| C | 1.84727308  | 5.17220381  | -3.48504684 |
| C | 4.80406229  | 1.49641634  | -3.14495163 |
| C | 4.65547647  | -3.31510548 | -2.45884304 |
| C | 0.60635176  | -5.45305898 | -2.39141008 |
| C | -3.79405536 | -3.79780179 | -2.49784039 |
| C | -6.27719222 | 4.27982173  | 2.59360492  |
| C | -0.91328640 | 7.91833870  | 2.10582791  |
| C | 5.17745841  | 5.83061959  | 2.15849622  |
| C | 7.37937701  | -0.18136869 | 2.70492489  |
| C | 4.00816038  | -6.02478037 | 3.48001641  |
| C | -2.45081572 | -6.95426875 | 3.29161332  |
| C | -6.82888508 | -2.15516128 | 3.15325912  |
| C | -3.66629049 | -6.65054157 | 4.15696395  |
| C | 3.14577745  | -7.23712858 | 3.81339880  |
| C | 7.45315448  | -1.25235072 | 3.78463644  |

|   |             |             |             |
|---|-------------|-------------|-------------|
| C | 6.19721984  | 5.18389664  | 3.08589938  |
| C | 0.30361980  | 8.33368947  | 2.92136319  |
| C | -5.80204959 | 5.50836614  | 3.35719100  |
| C | -7.40781958 | -0.99070047 | 3.94497703  |
| C | -3.87466976 | -7.74978082 | 5.18211972  |
| C | -8.34152166 | -1.50013459 | 5.02762951  |
| C | -6.84280859 | 5.93173175  | 4.37753761  |
| C | -0.05505800 | 9.46754758  | 3.86423025  |
| C | 6.81415371  | 6.22532069  | 4.00128846  |
| C | 8.62071611  | -0.98246179 | 4.71602363  |
| C | 3.94322601  | -8.25250307 | 4.61138243  |
| H | -2.02688370 | -2.32212285 | -8.44983319 |
| H | -0.32051456 | -2.81504150 | -8.23741343 |
| H | -1.48340083 | -3.91296042 | -9.04207967 |
| H | -1.16167407 | -4.64547804 | -6.85045121 |
| H | -2.67334778 | -4.03775384 | -6.93625456 |
| H | -0.41687251 | 2.21356881  | -3.49799795 |
| H | -0.02521987 | 2.94962085  | -1.16368292 |
| H | 0.05405999  | -1.87299808 | -2.24891016 |
| H | 0.76018438  | -4.50278894 | -6.35718098 |
| H | 3.12029027  | -3.93821480 | -6.19510492 |
| H | 3.81669541  | -1.73228911 | -5.27032305 |
| H | 2.10569476  | -0.15348778 | -4.44970688 |
| H | -0.50449853 | 0.50982595  | -5.11473580 |
| H | -2.17987241 | -1.50586276 | -3.58826766 |
| H | -2.69668439 | -0.03681754 | -4.39100494 |
| H | -3.36296752 | -1.96363537 | -5.76184617 |
| H | -2.08287202 | -1.07503191 | -6.61172935 |
| H | -1.75967202 | -3.58100585 | -4.88508037 |
| H | -3.22844831 | -2.18813117 | -1.17402802 |
| H | -4.47896810 | -4.73926552 | -0.05536363 |
| H | -3.49308815 | -2.24624814 | 1.40169574  |
| H | -6.32156562 | -3.31074321 | 1.03735442  |
| H | -6.71081461 | -1.38871897 | -0.38980685 |
| H | -3.04851221 | -6.21799538 | -0.18832220 |
| H | -0.24270781 | -4.02267198 | -1.01002018 |
| H | 1.03745596  | -6.59209181 | 0.00634012  |
| H | -0.32021322 | -4.35796047 | 1.58282889  |
| H | -1.26625978 | -7.21564572 | 1.14794355  |
| H | 3.10999725  | -6.33163146 | 0.26577552  |
| H | 4.93221608  | -5.15881037 | 1.39919168  |
| H | 3.06560306  | -2.75824273 | 1.44149102  |
| H | 5.71174678  | -3.19680011 | -0.00203801 |
| H | 2.92419006  | -2.98310020 | -1.21328970 |
| H | 6.63959347  | -1.47823213 | -0.59565574 |
| H | 3.71472711  | 0.56466227  | -1.52551802 |
| H | 6.03000324  | 2.47042692  | -0.95606137 |
| H | 4.21153127  | 0.95018037  | 0.97276790  |
| H | 7.18900620  | 0.66046395  | 0.40670522  |
| H | 5.43561376  | 4.42365598  | -1.16348349 |
| H | 4.23777931  | 6.26041822  | -0.07808220 |
| H | 2.15401501  | 4.15522698  | 0.62196679  |
| H | 1.92660017  | 6.57615891  | -1.22219062 |
| H | 1.96768801  | 3.62400422  | -1.98374943 |
| H | -0.01976520 | 7.23889404  | -1.33070139 |
| H | -2.06982745 | 7.39586363  | -0.00234348 |
| H | -1.55062101 | 4.46853932  | 0.65662445  |
| H | -3.84995634 | 5.73666920  | -0.89008717 |



|   |             |             |             |
|---|-------------|-------------|-------------|
| H | -1.63849406 | 3.98061222  | -2.00530394 |
| H | -5.51835327 | 4.50890080  | -0.93090323 |
| H | -3.76210475 | 1.35557694  | -1.52143226 |
| H | -6.52291587 | 0.63880352  | -0.43175636 |
| H | -4.04692228 | 1.64813336  | 1.04138487  |
| H | -6.72974624 | 2.99809970  | 0.54447520  |
| H | -4.80305909 | 1.08638872  | -3.70522604 |
| H | -5.00172612 | -0.42670118 | -2.77598533 |
| H | -2.43903257 | 4.77323862  | -4.16716130 |
| H | -3.78720669 | 4.05391257  | -3.25189296 |
| H | 2.19762803  | 4.46966628  | -4.25800232 |
| H | 0.75340422  | 5.20311139  | -3.51522649 |
| H | 4.44974884  | 0.71434997  | -3.83906038 |
| H | 4.14751435  | 2.36626671  | -3.23890960 |
| H | 4.02333728  | -3.73237973 | -3.25927240 |
| H | 4.82002043  | -2.25315648 | -2.66535576 |
| H | 1.63208397  | -5.07262884 | -2.37948157 |
| H | 0.06284023  | -4.94703124 | -3.21134525 |
| H | -2.81734190 | -4.29404750 | -2.48372126 |
| H | -3.82542244 | -3.08547087 | -3.34264628 |
| H | -6.48890388 | 3.44175074  | 3.26879556  |
| H | -7.19316140 | 4.54051674  | 2.04459841  |
| H | -1.74405549 | 7.60539813  | 2.74970145  |
| H | -1.23344617 | 8.77256900  | 1.49264457  |
| H | 4.38598854  | 6.34121918  | 2.72027889  |
| H | 5.69635828  | 6.56174360  | 1.52251932  |
| H | 7.26867421  | 0.81990641  | 3.13865272  |
| H | 8.30402376  | -0.21651414 | 2.11085022  |
| H | 4.31769675  | -5.49681890 | 4.39025163  |
| H | 4.90989073  | -6.37182747 | 2.96059579  |
| H | -1.53986177 | -7.05173878 | 3.89492571  |
| H | -2.62918877 | -7.89601798 | 2.75297135  |
| H | -6.28796942 | -2.85601755 | 3.80048285  |
| H | -7.65367299 | -2.68636364 | 2.65731156  |
| H | -3.47995265 | -5.69801542 | 4.68100217  |
| H | 2.28849452  | -6.89784328 | 4.41584702  |
| H | 6.51414112  | -1.21609834 | 4.36240477  |
| H | 5.67069263  | 4.43139501  | 3.69707634  |
| H | 0.62972147  | 7.46127366  | 3.51256363  |
| H | -4.86910198 | 5.24165022  | 3.88198194  |
| H | -6.56947403 | -0.45009458 | 4.41575747  |
| H | -3.00078774 | -7.86631436 | 5.82967453  |
| H | -4.07083999 | -8.70247886 | 4.68007093  |
| H | -4.74127401 | -7.51317143 | 5.80308808  |
| H | -7.82638440 | -2.17374319 | 5.71861087  |
| H | -9.18519908 | -2.03391057 | 4.57876280  |
| H | -8.74162414 | -0.65628662 | 5.59373436  |
| H | -7.05241005 | 5.13198116  | 5.09381422  |
| H | -7.77506966 | 6.20689915  | 3.87420876  |
| H | -6.48565733 | 6.80725729  | 4.92393954  |
| H | -0.85785293 | 9.18141137  | 4.54992954  |
| H | -0.37476810 | 10.34573813 | 3.29441727  |
| H | 0.82271404  | 9.74908675  | 4.44985102  |
| H | 6.05483502  | 6.72617578  | 4.60885507  |
| H | 7.34636208  | 6.97855600  | 3.41177099  |
| H | 7.53682470  | 5.74771957  | 4.66642327  |
| H | 8.53548499  | -0.00236075 | 5.19432136  |
| H | 9.56330243  | -1.02222461 | 4.16086803  |

|   |             |             |             |
|---|-------------|-------------|-------------|
| H | 8.65588083  | -1.74981613 | 5.49239673  |
| H | 4.35190964  | -7.81299700 | 5.52646841  |
| H | 4.77222032  | -8.63742883 | 4.00896110  |
| H | 3.30567778  | -9.09617668 | 4.88460999  |
| H | -5.52497277 | 0.15927602  | 2.13178880  |
| H | -3.64156389 | 4.75497501  | 1.67735923  |
| H | -3.25378921 | 6.80753580  | -3.37596445 |
| H | 1.07574061  | 6.09126130  | 1.39813311  |
| H | 3.26298758  | 6.45070939  | -3.63392194 |
| H | 4.99960395  | 3.07845117  | 1.60907578  |
| H | 5.09002216  | -1.82671670 | 2.26085952  |
| H | 5.76292954  | -4.84267700 | -2.13795641 |
| H | -0.20587924 | -7.18041864 | -2.37200999 |
| H | 1.42126917  | -5.43875589 | 2.61216159  |
| H | -3.33246893 | -4.36150762 | 2.44486133  |
| H | -5.61750069 | -4.36655677 | -2.47530351 |
| H | -6.96897057 | 1.56319599  | -2.94486606 |
| H | 6.68472543  | 1.17710292  | -3.26048121 |
| H | -4.83274689 | -5.69846914 | 2.93557900  |
| H | -7.51368286 | 0.42109033  | 2.62037167  |
| H | -4.73905927 | 6.45233592  | 2.03727405  |
| H | 1.76545846  | 8.00317381  | 1.69000093  |
| H | 6.90443902  | 3.75263984  | 1.98376605  |
| H | 6.77996231  | -2.82670845 | 2.87732850  |
| H | 1.82514794  | -7.44874584 | 2.43100079  |

2-HP-B-CD:trans-(1R,4S)-SRT\_1\_MD E(Ha)= -7253.92292611

|    |               |               |               |
|----|---------------|---------------|---------------|
| C  | 0.3048797464  | 1.8942303731  | -2.5764649672 |
| C  | -0.6398053676 | 2.4731038598  | -3.6148225726 |
| C  | -1.1304616821 | 3.7838089562  | -3.5099304375 |
| C  | -0.7031825774 | 4.7238440257  | -2.4036922552 |
| C  | -0.1677841554 | 3.9402069349  | -1.1953260850 |
| C  | 0.8932615473  | 2.9534912703  | -1.6566921110 |
| C  | -1.0294122162 | 1.6714818647  | -4.6969347990 |
| C  | -1.9011124867 | 2.1496154684  | -5.6655210543 |
| C  | -2.3943766803 | 3.4502500322  | -5.5666621890 |
| C  | -2.0064555104 | 4.2535875952  | -4.4998222402 |
| C  | 0.3084937605  | 5.7591662745  | -2.8835573084 |
| C  | 0.6084003172  | 6.8452007874  | -2.0549251442 |
| C  | 1.5354282921  | 7.8008092544  | -2.4406141539 |
| C  | 2.1845540688  | 7.7010772085  | -3.6708608307 |
| C  | 1.9006139522  | 6.6169589512  | -4.5032155802 |
| C  | 0.9689484250  | 5.6580596276  | -4.1062632729 |
| Cl | 3.3298800377  | 8.9128446428  | -4.1223799096 |
| Cl | 2.6864080582  | 6.4274010596  | -6.0323601817 |
| N  | -0.4359998293 | 0.8124132847  | -1.8339631683 |
| C  | 0.2757764414  | 0.1636092333  | -0.7132898241 |
| C  | -3.2180383640 | 3.9701956534  | 1.3837713260  |
| C  | -4.6777649536 | 3.7525703557  | 1.0154593968  |
| C  | -5.2257627939 | 2.5648486102  | 1.8127897762  |
| O  | -5.1179686563 | 2.8178806516  | 3.1798492448  |
| C  | -3.7669316654 | 2.9162314365  | 3.6391811175  |
| C  | -3.0471226052 | 4.0422324806  | 2.8976006914  |
| O  | -4.4945677053 | 1.3869757810  | 1.5454595733  |
| C  | -4.8550640943 | 0.6093996027  | 0.4197203387  |
| C  | -3.5712620888 | 0.2230582474  | -0.3100730260 |
| C  | -3.8355815206 | -0.8193301733 | -1.3931481367 |
| C  | -4.6912255716 | -1.9765347563 | -0.8505879191 |
| O  | -5.8546537255 | -1.4729915845 | -0.2489490819 |
| C  | -5.6096258409 | -0.6352415099 | 0.8787368653  |
| O  | -3.8891639782 | -2.6999800597 | 0.0441391718  |
| C  | -4.3439907133 | -4.0105415620 | 0.3651238764  |
| C  | -3.8854454396 | -5.0001161441 | -0.7019524034 |
| C  | -4.0084063432 | -6.4329254123 | -0.2092257385 |
| C  | -3.2355533761 | -6.5607009452 | 1.1011114141  |
| O  | -3.8464189504 | -5.7281870039 | 2.0497284224  |
| C  | -3.7255473758 | -4.3361999029 | 1.7338268291  |
| O  | -1.9284895293 | -6.1372907373 | 0.8438327924  |
| C  | -0.7819588638 | -6.9243894945 | 1.1289904799  |
| C  | 0.0759133634  | -6.7327011849 | -0.1243121210 |
| C  | 1.4995418650  | -7.2105625622 | 0.0710177742  |
| C  | 2.0463559473  | -6.5917491364 | 1.3661530612  |
| O  | 1.2468681134  | -6.9396948437 | 2.4484582201  |
| C  | -0.0757136053 | -6.4114239823 | 2.3848184803  |
| O  | 2.0563297718  | -5.1864558369 | 1.1974800756  |
| C  | 3.3048651296  | -4.5327110565 | 1.0996320918  |
| C  | 3.1472110568  | -3.4600475604 | 0.0356446475  |
| C  | 4.4632076406  | -2.7105282803 | -0.1036997825 |
| C  | 4.8628205335  | -2.1345225197 | 1.2612721701  |
| O  | 4.9290872943  | -3.1607278272 | 2.2160285165  |
| C  | 3.7129370993  | -3.8866547555 | 2.4209555554  |
| O  | 2.2740815412  | -6.7852068223 | -1.0356458850 |
| C  | 3.3593766723  | -7.6549926054 | -1.3560256036 |

C 4.2660449553 -6.9874540252 -2.3770662688  
O 4.8682833949 -5.8278996549 -1.8337830945  
O -0.5093605937 -7.3730434802 -1.2382695505  
O -3.4795620379 -7.2754151190 -1.2199911264  
C -4.0335615008 -8.5959170143 -1.2349131881  
C -2.9625300111 -9.6206910865 -1.5750929921  
O -1.9727878334 -9.6423043906 -0.5668955930  
O -4.6356768840 -4.8159310803 -1.8873440889  
O -2.5756851843 -1.2465481089 -1.8773536327  
C -2.6279753867 -1.9314951566 -3.1146397033  
C -1.2432538415 -2.4592337147 -3.4539876427  
O -0.3524276554 -1.3506182807 -3.5284255952  
O -2.9151070846 1.3608214114 -0.8451006875  
O -4.8635475190 3.4136266743 -0.3374913767  
C -4.8959553712 4.4436305823 -1.2977165096  
C -5.3048106720 3.7755667108 -2.6038157350  
O -4.4148762827 2.6869664301 -2.8774201488  
O -2.7411302883 5.1451832645 0.7663954245  
O -1.6422138482 3.9531430047 3.1157052547  
C -1.0262328490 4.7886198988 4.0513414794  
C 0.0506847637 5.5978868321 3.3219420296  
C 1.1176216650 4.6590609846 2.7806079789  
C 1.6310904035 3.6869123076 3.8365372556  
C 0.4916534076 3.0485618815 4.6249280916  
O -0.4241577094 4.0465451180 5.0802222821  
O -0.5332628069 6.2937732875 2.2328133554  
C -0.4822237155 7.7162860334 2.2666373475  
C 0.9164577280 8.2830723908 2.0130709293  
O 1.4916750569 7.6643935987 0.8794836011  
O 2.1605279393 5.4548101275 2.2773393430  
O 2.3391189061 2.6450126019 3.1711715869  
C 3.7386448356 2.6816153832 3.1543189109  
C 4.2362834423 2.5444140624 1.7118036452  
C 3.8514724542 1.1784764750 1.1639651179  
C 4.4072665145 0.1059245681 2.0916498504  
C 3.9633319489 0.3240515172 3.5369691585  
O 4.2818065716 1.6576932725 3.9441005237  
O 3.7168533101 3.6087935802 0.9402873672  
C 4.5996192635 4.0980204011 -0.0717156654  
C 4.0994586681 5.4399611933 -0.5659290528  
O 4.1841002048 6.3252619484 0.5336777657  
O 4.3547941602 1.0454160497 -0.1399453937  
O 3.9318333068 -1.1486281217 1.6085916419  
O 4.3909023930 -1.6522995605 -1.0399371020  
C 4.6584555805 -1.9943521035 -2.3983039915  
C 3.5371015943 -1.5086385399 -3.3185987856  
O 2.2579282067 -1.8748411710 -2.8118180626  
O 2.7867962270 -4.0383136269 -1.2174123263  
C 3.9938148948 -4.9111201104 3.5050375609  
O 4.9386191547 -5.8693672625 3.0871279042  
C 4.7113850979 -0.5678797634 4.5145020445  
O 6.0957303598 -0.3260647341 4.4721671632  
C 0.9639488510 2.3270010498 5.8731526957  
O -0.0974169935 1.6913067646 6.5365140901  
C -3.8648027710 3.1696450438 5.1323871255  
O -4.5107668434 4.3871962223 5.4194288660  
C -6.9641730112 -0.3272277849 1.4848874780  
O -7.7729558685 0.4452174149 0.6239861097

|   |               |                |               |
|---|---------------|----------------|---------------|
| C | -4.3883635404 | -3.5996818961  | 2.8828850360  |
| O | -5.7856272194 | -3.7548971315  | 2.9061312790  |
| C | -0.7669541285 | -6.8034702164  | 3.6705976597  |
| O | -0.2078080031 | -6.0293578510  | 4.7053695079  |
| C | 5.3749969037  | -7.9289515098  | -2.8040616868 |
| C | -0.7624602953 | -3.5036412260  | -2.4597951143 |
| C | -6.7190025523 | 3.2273165073   | -2.5680240286 |
| C | 0.8529496184  | 9.7791947000   | 1.7810601701  |
| C | 4.9340194903  | 5.9228785257   | -1.7433254344 |
| C | -3.5717106859 | -11.0071684552 | -1.6841541994 |
| C | 3.5563618077  | -0.0070116695  | -3.5268951158 |
| H | 3.0540401182  | -6.9524661995  | 1.6004835139  |
| H | 1.5190345860  | -8.3057819476  | 0.1533569339  |
| H | 0.1149841301  | -5.6478272399  | -0.3034888997 |
| H | -1.0568166841 | -7.9834546022  | 1.2337832343  |
| H | -3.2569135305 | -7.5808951223  | 1.5013460266  |
| H | -5.0660734609 | -6.6689419710  | -0.0309853791 |
| H | -2.8219219555 | -4.8008012615  | -0.8900598196 |
| H | -5.4384083283 | -4.0259043511  | 0.4475375181  |
| H | -5.0497332322 | -2.6260832726  | -1.6531789584 |
| H | -4.4105535124 | -0.3384845455  | -2.2008537436 |
| H | -2.8804195319 | -0.2090623060  | 0.4237188334  |
| H | -5.4984125746 | 1.1776730289   | -0.2586985773 |
| H | -6.2900123661 | 2.4215264606   | 1.5904339504  |
| H | -5.2659799305 | 4.6466521961   | 1.2748589783  |
| H | -2.6684415797 | 3.0852383405   | 1.0313239760  |
| H | -3.4289919303 | 5.0065186939   | 3.2580624514  |
| H | -1.7583333888 | 5.4427567758   | 4.5382250999  |
| H | 0.5062162188  | 6.2991764741   | 4.0326556884  |
| H | 0.6517241574  | 4.0550737989   | 1.9877212851  |
| H | 2.2996724363  | 4.2313389816   | 4.5198377461  |
| H | 4.1072585182  | 3.6183039610   | 3.5878336105  |
| H | 5.3334420495  | 2.6138220006   | 1.7389445580  |
| H | 2.7518714202  | 1.1009870780   | 1.1784700928  |
| H | 5.5049010471  | 0.1283642195   | 2.0613378270  |
| H | 5.8722107168  | -1.7127693723  | 1.2092755811  |
| H | 5.2463371218  | -3.4213172764  | -0.4022598230 |
| H | 2.3612739963  | -2.7590906353  | 0.3464077009  |
| H | 4.0876611102  | -5.2363001630  | 0.7877251455  |
| H | 2.9168310713  | -3.2067260564  | 2.7550905206  |
| H | 2.8808219428  | 0.1496768941   | 3.6143927611  |
| H | -0.0359173427 | 2.3389423566   | 3.9753354279  |
| H | -3.2374898276 | 1.9728450822   | 3.4589593049  |
| H | -5.0042197351 | -1.1641807655  | 1.6225293378  |
| H | -2.6631592181 | -4.0640599580  | 1.7009171523  |
| H | -0.0344187164 | -5.3157076837  | 2.3345922069  |
| H | -1.4300938437 | -7.0586804528  | -1.2935455972 |
| H | 2.8059279896  | 4.9032293342   | 1.7879596898  |
| H | 2.3171584734  | -4.8824738400  | -1.0472851621 |
| H | -4.4080495231 | -5.5616469738  | -2.4581482694 |
| H | -3.5573105905 | 1.9058890227   | -1.3509351842 |
| H | -1.9143201927 | 5.4010709466   | 1.2130073390  |
| H | 4.2924443765  | 0.1063258643   | -0.3922933712 |
| H | 2.9571150140  | -8.5958316705  | -1.7557599373 |
| H | 3.9511473916  | -7.8787763820  | -0.4570558204 |
| H | 3.6506447927  | -6.7257489303  | -3.2536722359 |
| H | 6.0279932631  | -7.4255351171  | -3.5200359619 |
| H | 4.9736035010  | -8.8319435251  | -3.2720320628 |

|   |               |                |               |
|---|---------------|----------------|---------------|
| H | 5.9817441183  | -8.2199187795  | -1.9409606561 |
| H | 4.1687842620  | -5.1670632534  | -1.7188989255 |
| H | -2.9738612383 | -1.2496683302  | -3.9067704494 |
| H | -3.3146819728 | -2.7883521628  | -3.0665763294 |
| H | -1.3197974162 | -2.9219971114  | -4.4500931840 |
| H | 0.2699925688  | -3.7968745490  | -2.6698866314 |
| H | -1.3759821760 | -4.4057680607  | -2.5383247214 |
| H | -0.8319589170 | -3.1253014533  | -1.4364928136 |
| H | 0.5796794714  | -1.6422003465  | -3.4331140541 |
| H | -3.9143854994 | 4.9248251224   | -1.3871433262 |
| H | -5.6270399956 | 5.2183459346   | -1.0197821253 |
| H | -5.2279085728 | 4.5223008580   | -3.4070620260 |
| H | -6.9437166830 | 2.7080482723   | -3.5025412799 |
| H | -7.4404559334 | 4.0393778307   | -2.4392471232 |
| H | -6.8445669947 | 2.5286702235   | -1.7369092386 |
| H | -3.6841137976 | 3.0215745769   | -3.4144243527 |
| H | -0.8792653247 | 8.0961166213   | 3.2194366257  |
| H | -1.1549716389 | 8.0375427943   | 1.4650279902  |
| H | 1.5465601423  | 8.0783816918   | 2.8931453366  |
| H | 0.4132050710  | 10.2977261837  | 2.6381339202  |
| H | 0.2491397972  | 10.0000006329  | 0.8947846094  |
| H | 1.8578844929  | 10.1750666231  | 1.6178697410  |
| H | 1.6892865535  | 6.7552314070   | 1.1880890504  |
| H | 4.2978051653  | -0.4099448694  | 5.5213673795  |
| H | 4.5608705396  | -1.6149932331  | 4.2407844302  |
| H | 6.2124394931  | 0.6032810912   | 4.7033620484  |
| H | 1.6860188088  | 1.5569350272   | 5.5882619375  |
| H | 1.4818626881  | 3.0503774524   | 6.5235005732  |
| H | -0.7070261431 | 2.3894799808   | 6.8015795967  |
| H | 4.6579323915  | 3.3731900021   | -0.8893236127 |
| H | 5.6036080247  | 4.2379713714   | 0.3533981352  |
| H | 3.0509798627  | 5.3237537983   | -0.8857444230 |
| H | 5.9862400108  | 6.0070817474   | -1.4546046920 |
| H | 4.5939617041  | 6.9096202243   | -2.0673239343 |
| H | 4.8549614543  | 5.2447319487   | -2.5991537106 |
| H | 3.5933820533  | 7.0772061921   | 0.3899860147  |
| H | -4.3782420339 | 2.3154038014   | 5.5970824593  |
| H | -2.8569973409 | 3.2263706785   | 5.5537068915  |
| H | -5.3935124014 | 4.3218649030   | 5.0360492899  |
| H | -4.8562107483 | -8.6292735838  | -1.9618873974 |
| H | -4.4364061586 | -8.8441132124  | -0.2450803406 |
| H | -2.5162522109 | -9.3428253768  | -2.5430656572 |
| H | -4.3457683779 | -11.0503865998 | -2.4559345736 |
| H | -4.0132936231 | -11.3030102769 | -0.7271798009 |
| H | -2.7920674491 | -11.7309167068 | -1.9298421374 |
| H | -1.2761835508 | -9.0169900226  | -0.8271257455 |
| H | -7.4391118718 | -1.2803792196  | 1.7548322892  |
| H | -6.8249271666 | 0.2509919886   | 2.4026338423  |
| H | -7.9106438015 | -0.0834902157  | -0.1705494300 |
| H | 4.7795917709  | -3.0780138164  | -2.4923748079 |
| H | 5.6021529397  | -1.5278540525  | -2.7088044075 |
| H | 3.7065355964  | -1.9985058412  | -4.2911293399 |
| H | 4.4838920398  | 0.2962462446   | -4.0210374396 |
| H | 3.4856141384  | 0.5291155016   | -2.5753069145 |
| H | 2.7265390745  | 0.2908347656   | -4.1748549023 |
| H | 2.3418108403  | -2.7158726386  | -2.3194519756 |
| H | -3.9208536121 | -3.9446069592  | 3.8162530096  |
| H | -4.1846879541 | -2.5313398535  | 2.7856414347  |

|   |               |               |               |
|---|---------------|---------------|---------------|
| H | -5.9625615229 | -4.6914805506 | 3.0491984837  |
| H | 4.3209549661  | -4.3836387000 | 4.4121663392  |
| H | 3.0690801754  | -5.4468594068 | 3.7406073427  |
| H | 5.7613299682  | -5.3960520252 | 2.9157869219  |
| H | -1.8469222889 | -6.6179464993 | 3.5628354522  |
| H | -0.6147897561 | -7.8820441139 | 3.8281289355  |
| H | -0.4750587999 | -6.4097316871 | 5.5468811960  |
| H | -1.3778901894 | 1.1340684819  | -1.4988444553 |
| H | -0.6270127915 | 0.0405844949  | -2.5106894233 |
| H | 0.3857531340  | 0.8531463159  | 0.1231531812  |
| H | -0.3358214644 | -0.6861800327 | -0.4066617719 |
| H | 1.2507498071  | -0.1913813048 | -1.0550587160 |
| H | 0.1412189453  | 6.9497391419  | -1.0804418895 |
| H | 1.7661692960  | 8.6268811561  | -1.7769649815 |
| H | 0.7625617831  | 4.8350271870  | -4.7818361000 |
| H | -0.6483147930 | 0.6551637688  | -4.7689777273 |
| H | -2.1884457541 | 1.5164462112  | -6.4990601280 |
| H | -3.0702530811 | 3.8400396094  | -6.3219190564 |
| H | -2.3652845930 | 5.2782697975  | -4.4337372888 |
| H | -1.5885551357 | 5.2796672325  | -2.0694322590 |
| H | 0.2416999221  | 4.6345754061  | -0.4559916078 |
| H | -1.0043279334 | 3.4235938500  | -0.7078295141 |
| H | 1.6547311765  | 3.4877883643  | -2.2374922977 |
| H | 1.4317226733  | 2.4971618694  | -0.8215907438 |
| H | 1.1191375818  | 1.3665264349  | -3.0824104397 |

255

2-HP-B-CD:trans-(1R,4S)-SRT\_2\_MD E(Ha)= -7253.91935893

|    |                |               |               |
|----|----------------|---------------|---------------|
| C  | 2.3655921231   | 0.9156948779  | 4.7149394257  |
| C  | 2.3882332912   | -0.4600037505 | 5.3287534259  |
| C  | 1.1767210460   | -1.1666907515 | 5.2263783528  |
| C  | -0.02111156842 | -0.4598844566 | 4.6228157307  |
| C  | -0.1207975393  | 0.9244359691  | 5.2802354742  |
| C  | 1.1783573633   | 1.7534823194  | 5.1996245278  |
| C  | 3.5072078879   | -1.0819228010 | 5.8840072869  |
| C  | 3.4284447974   | -2.3990322484 | 6.3422884006  |
| C  | 2.2294693576   | -3.0986412595 | 6.2373563108  |
| C  | 1.1095922960   | -2.4805978870 | 5.6846152609  |
| C  | 0.0490982369   | -0.4628244400 | 3.0971595922  |
| C  | 0.2777671672   | -1.6750140463 | 2.4334215212  |
| C  | 0.3566671475   | -1.7272846043 | 1.0497028793  |
| C  | 0.2220891460   | -0.5687260972 | 0.2892511021  |
| C  | -0.0289568966  | 0.6404245500  | 0.9354402507  |
| C  | -0.1267517290  | 0.6887983754  | 2.3287712761  |
| Cl | 0.3621836332   | -0.6667681369 | -1.4324073058 |
| CI | -0.1985175217  | 2.1033012998  | 0.0284312379  |
| N  | 3.6574970304   | 1.6596423854  | 4.8311457965  |
| C  | 4.0717954972   | 2.1342999680  | 6.1693704194  |
| C  | 2.7539023958   | 4.7900639219  | 2.9935932375  |
| O  | 3.5165260372   | 3.5957206936  | 2.9605144913  |
| C  | 1.8605470917   | 4.9504568793  | 1.7704785093  |
| C  | 2.6782026464   | 5.1434686527  | 0.4944743996  |
| C  | 1.9569302320   | 5.8410952409  | -0.6595591899 |
| C  | 1.0702025878   | 6.9791436687  | -0.1771347602 |
| C  | 0.2348541195   | 6.4989466883  | 1.0094235785  |
| O  | 1.0786654230   | 6.1034013238  | 2.0592173685  |
| O  | -0.5623874206  | 5.4283977553  | 0.5861691870  |
| C  | -1.9739363405  | 5.4617967581  | 0.7292157630  |
| C  | -2.5265603707  | 5.0968619051  | -0.6525697158 |
| C  | -4.0316946127  | 4.8950834311  | -0.6101844048 |
| C  | -4.4285482875  | 3.9816589788  | 0.5555749896  |
| O  | -3.8932061229  | 4.4976564312  | 1.7604761630  |
| C  | -2.4515172405  | 4.4540322962  | 1.7693753666  |
| O  | -3.9463470438  | 2.6930408269  | 0.3314295671  |
| C  | -4.8387251096  | 1.5841648033  | 0.3933753405  |
| C  | -4.3582098606  | 0.6651345433  | -0.7249737845 |
| C  | -5.1527858588  | -0.6313585888 | -0.7783776938 |
| C  | -5.3214937315  | -1.2543107183 | 0.6195400429  |
| O  | -5.7197297819  | -0.2848360610 | 1.5553387749  |
| C  | -4.8261976687  | 0.8165934168  | 1.7165736250  |
| O  | -4.4775062876  | 4.3254352177  | -1.8175600073 |
| C  | -5.6808591925  | 4.8799214388  | -2.3393466260 |
| C  | -6.4585892429  | 3.8077994241  | -3.0848754506 |
| O  | -6.8501359443  | 2.7838689431  | -2.1946035513 |
| O  | -2.2154026063  | 6.1117433190  | -1.5732189955 |
| O  | 0.1368194947   | 7.4151142103  | -1.1484238365 |
| C  | 0.6568664219   | 8.1678647118  | -2.2458325981 |
| C  | -0.3784111434  | 8.2233693133  | -3.3628556240 |
| O  | -0.6487062315  | 6.9248621244  | -3.8813931126 |
| O  | 2.9422406811   | 6.3272757781  | -1.5407850799 |
| C  | 3.1036399033   | 3.8510235690  | 0.0552489161  |
| O  | 4.4101436291   | 3.7127960940  | -0.4102932773 |
| C  | 4.4355462074   | 3.0957935958  | -1.8282895476 |
| C  | 4.0574078306   | 1.6208648051  | -1.7817270131 |



C 4.8948252965 0.9074945034 -0.7253857812  
C 4.7458339851 1.5599130064 0.6413568609  
O 5.1470839170 2.9374434113 0.5221240723  
O 3.6114904785 3.9170723264 -2.6238237367  
C 3.0485999487 3.4034497797 -3.8307926832  
C 2.2014141447 4.4855148088 -4.4795040676  
O 1.2037539804 4.8316103565 -3.5489315362  
O 4.3097413904 1.0285850250 -3.0366679679  
O 4.4362615989 -0.4330104610 -0.7310220300  
C 5.3813729741 -1.4698276856 -0.6397805113  
C 5.2077648080 -2.4216501497 -1.8267458599  
C 3.9300364320 -3.2351601378 -1.7217566789  
C 3.8029559271 -3.8450525940 -0.3251628442  
C 3.9707487435 -2.7698373279 0.7411172013  
O 5.2468564407 -2.1442559309 0.5787313239  
O 5.2308613767 -1.6566739217 -3.0085546366  
C 6.3073071804 -1.9266149838 -3.8998160497  
C 6.5716196600 -0.6901929122 -4.7467626972  
O 6.9222340022 0.4012179433 -3.9227131332  
O 3.9583549225 -4.2342755471 -2.7011075833  
O 2.5037931896 -4.4215151184 -0.2428044757  
C 2.3766417486 -5.8065434953 -0.0880796980  
C 1.3316246589 -6.3101639588 -1.0896669930  
C -0.0219203528 -5.7238343953 -0.7355157360  
C -0.3638842151 -5.9161341720 0.7354018693  
C 0.7879437108 -5.4986762744 1.6480335910  
O 1.9846827849 -6.1482743859 1.2207926536  
O 1.7116609692 -5.9328284286 -2.3976846058  
C 1.6604514203 -6.8972320906 -3.4547472376  
C 0.6015518796 -6.5667836158 -4.5103691855  
O -0.6976499934 -6.9302446559 -4.0883167178  
O -0.9883565121 -6.3513400303 -1.5296960867  
O -1.5172049345 -5.1106387856 0.9445379459  
C -2.6510338402 -5.6204400046 1.5937087285  
C -3.8472473186 -5.5887291016 0.6448705378  
C -4.1761857627 -4.1540253957 0.2378090449  
C -4.2421027558 -3.2246832637 1.4532680528  
C -3.1225017893 -3.4439552807 2.4688192996  
O -2.9159739246 -4.8452618006 2.7375666951  
O -3.4929492832 -6.4037993528 -0.4598869697  
C -4.5695010718 -6.9002844127 -1.2555244368  
C -4.0295822208 -7.3838112970 -2.5930412264  
O -3.3966976320 -6.2673341145 -3.2158942611  
O -5.4170004860 -4.0977727638 -0.4164396716  
O -4.1321767667 -1.8752502273 1.0299607942  
O -4.5401304537 -1.5794729923 -1.6132151508  
C -4.9278862777 -1.5526371912 -2.9747354915  
C -4.2999288122 -2.7514837488 -3.6541464934  
O -4.8483349793 -3.9099120641 -3.0455674827  
O -4.4754741381 1.3171838948 -1.9775011508  
C -5.3530266882 1.5467513842 2.9516011414  
O -4.4755329065 2.5152406675 3.4782952301  
C -3.4541246339 -2.8058380950 3.8039768897  
O -2.3923156312 -2.8646020624 4.7318443949  
C 0.5900163742 -5.8465185219 3.1231822318  
O -0.2221198243 -4.9138606776 3.7935523739  
C 3.9290045010 -3.2678364453 2.1633339665  
O 3.8267008808 -2.1216114326 2.9872239773

|   |               |               |               |
|---|---------------|---------------|---------------|
| C | 5.6292894997  | 0.9462358803  | 1.7428652341  |
| O | 4.8997547711  | 0.3753323148  | 2.8093311923  |
| C | -1.9701668491 | 4.6645152974  | 3.1952895181  |
| O | -1.8483969405 | 3.4507534392  | 3.9050948577  |
| C | -7.7042419751 | 4.3960085836  | -3.7217883447 |
| C | 3.0044438628  | 5.6888417500  | -4.9600884986 |
| C | 7.7087306052  | -0.9413918631 | -5.7196024958 |
| C | 0.6665624152  | -5.1098822861 | -4.9498399244 |
| C | -3.0956320359 | -8.5777816586 | -2.4774505818 |
| C | -1.6589208992 | 8.9503735624  | -2.9816879713 |
| C | -4.5696215351 | -2.7474543275 | -5.1505467644 |
| H | -5.5184462692 | 3.9774167534  | 0.6769303204  |
| H | -4.4969098975 | 5.8765200824  | -0.4468042362 |
| H | -2.0653193803 | 4.1424590033  | -0.9495879153 |
| H | -2.3095750474 | 6.4743072720  | 0.9983678798  |
| H | -0.3794114411 | 7.3169458733  | 1.4026722110  |
| H | 1.6914751579  | 7.8236836344  | 0.1555481852  |
| H | 1.3188279568  | 5.1081615097  | -1.1670669777 |
| H | 3.5589391072  | 5.7630314136  | 0.7272794639  |
| H | 4.9142404422  | 4.6847652349  | -0.4382813878 |
| H | 5.4755754654  | 3.1487008335  | -2.1912469578 |
| H | 2.9953378769  | 1.5204978413  | -1.5094236109 |
| H | 5.9508105068  | 0.9482177582  | -1.0341905651 |
| H | 6.3973646931  | -1.0579911115 | -0.6540830988 |
| H | 6.0501835467  | -3.1261409525 | -1.8101761537 |
| H | 3.0736740059  | -2.5548009147 | -1.8607000298 |
| H | 4.5719390276  | -4.6210762627 | -0.2003263430 |
| H | 3.3374208612  | -6.3072020254 | -0.2521093114 |
| H | 1.2826726133  | -7.4041124754 | -1.0052913341 |
| H | 0.0142846156  | -4.6425747041 | -0.9353478307 |
| H | -0.6003774064 | -6.9773808807 | 0.9041284127  |
| H | -2.4705933750 | -6.6431084905 | 1.9474395461  |
| H | -4.7103019019 | -6.0230681386 | 1.1703728440  |
| H | -3.3686868290 | -3.7869580313 | -0.4080160546 |
| H | -5.2138755113 | -3.3911201011 | 1.9447806941  |
| H | -6.1317162709 | -1.9863918919 | 0.5838532102  |
| H | -6.1658733010 | -0.3914609028 | -1.1387909449 |
| H | -3.3050225946 | 0.4132020371  | -0.5306952626 |
| H | -5.8634603367 | 1.9200160526  | 0.1778495645  |
| H | -3.8060418580 | 0.4632993322  | 1.9268147711  |
| H | -2.1967151170 | -3.0111342913 | 2.0757605068  |
| H | 0.9180861165  | -4.4127051879 | 1.5817159842  |
| H | 3.1767253253  | -2.0202504554 | 0.6223457087  |
| H | 3.6956764443  | 1.4966072913  | 0.9583469984  |
| H | 1.2235747891  | 4.0657744428  | 1.6533338338  |
| H | -2.1239480314 | 3.4566249797  | 1.4613360405  |
| H | -1.3080789973 | 6.4206273959  | -1.3645304833 |
| H | -1.8951212897 | -6.1068309887 | -1.2483633830 |
| H | -4.0572738457 | 2.1908634079  | -1.8906028431 |
| H | 3.1568956608  | 5.5703686069  | -2.1170247629 |
| H | 4.2907223774  | 0.0591025026  | -2.9189886184 |
| H | 3.1125070285  | -4.7144805725 | -2.6465287273 |
| H | -5.2496059401 | -3.8535242542 | -1.3542601495 |
| H | -5.4363367294 | 5.7240757283  | -2.9991135835 |
| H | -6.3160983853 | 5.2487940140  | -1.5218858419 |
| H | -5.8055884266 | 3.3999320319  | -3.8730512809 |
| H | -8.2561571331 | 3.6103901782  | -4.2419561284 |
| H | -7.4557780452 | 5.1845798134  | -4.4381511456 |

|   |               |               |               |
|---|---------------|---------------|---------------|
| H | -8.3621144413 | 4.8155423445  | -2.9536619039 |
| H | -6.1166058370 | 2.1466662655  | -2.1586454729 |
| H | 2.4096538422  | 2.5453576279  | -3.6042349046 |
| H | 3.8392425512  | 3.0785269893  | -4.5171953954 |
| H | 1.7568851120  | 3.9999712716  | -5.3670777077 |
| H | 2.3398890744  | 6.4134444415  | -5.4416806031 |
| H | 3.7549762794  | 5.3866757811  | -5.6972334284 |
| H | 3.5132766241  | 6.1938495284  | -4.1353793079 |
| H | 0.6630047093  | 5.5745802104  | -3.8747628321 |
| H | 6.0612582378  | -2.7962956683 | -4.5234528809 |
| H | 7.2189075853  | -2.1496307856 | -3.3276483968 |
| H | 5.6540848682  | -0.4634048443 | -5.3135334136 |
| H | 7.4890364601  | -1.7802392190 | -6.3865459346 |
| H | 8.6325548400  | -1.1592171469 | -5.1742134541 |
| H | 7.8788760058  | -0.0483258867 | -6.3245379770 |
| H | 6.0930835750  | 0.8071219482  | -3.6240880487 |
| H | 1.4671976125  | -7.8961255270 | -3.0463751658 |
| H | 2.6507063608  | -6.8983671091 | -3.9261873406 |
| H | 0.8337844991  | -7.2099055161 | -5.3705578427 |
| H | 0.4409719521  | -4.4484703308 | -4.1086548418 |
| H | -0.0656374234 | -4.9295399606 | -5.7404411107 |
| H | 1.6600966305  | -4.8479729641 | -5.3292889066 |
| H | -0.7972742755 | -6.6195310698 | -3.1638107717 |
| H | -3.6740015336 | -1.7496062118 | 3.6303407231  |
| H | -4.3620166645 | -3.2784068521 | 4.2071196815  |
| H | -2.2723225772 | -3.7858280423 | 4.9863059903  |
| H | 0.2112945768  | -6.8758605851 | 3.2227709047  |
| H | 1.5733577233  | -5.8170225539 | 3.6025738358  |
| H | -1.1155534186 | -4.9306774079 | 3.4132362177  |
| H | -5.3092649563 | -6.1111921142 | -1.4042992279 |
| H | -5.0577456761 | -7.7401791374 | -0.7398095911 |
| H | -4.9108634485 | -7.6790738894 | -3.1847053757 |
| H | -2.6804273650 | -8.8381653883 | -3.4557225365 |
| H | -3.6456562388 | -9.4454596291 | -2.1013185034 |
| H | -2.2618484238 | -8.3670691761 | -1.8052235393 |
| H | -2.7434403332 | -6.5663853604 | -3.8685554586 |
| H | 3.0637761690  | -3.9250347617 | 2.2986638114  |
| H | 4.8430715954  | -3.8409457426 | 2.3753017048  |
| H | 3.7201173201  | -2.3776446645 | 3.9123478513  |
| H | 1.5716487601  | 7.6975650050  | -2.6107576232 |
| H | 0.8943079383  | 9.1877679951  | -1.9079115313 |
| H | 0.1060377995  | 8.7689590659  | -4.1831214479 |
| H | -1.4396778487 | 9.9754421472  | -2.6685487252 |
| H | -2.1728307065 | 8.4394692973  | -2.1631061853 |
| H | -2.3333006496 | 8.9898719154  | -3.8409551072 |
| H | -1.3427248585 | 6.5131564350  | -3.3405766776 |
| H | 6.3224813930  | 0.2071356249  | 1.3274676852  |
| H | 6.2332389857  | 1.7605364872  | 2.1560996715  |
| H | 4.6592399008  | -0.5592235728 | 2.6373854657  |
| H | -4.5962932814 | -0.6266713431 | -3.4585724027 |
| H | -6.0239221490 | -1.6210591252 | -3.0625701511 |
| H | -3.2150712908 | -2.7077900634 | -3.4707055639 |
| H | -4.1268131388 | -3.6310765434 | -5.6193501312 |
| H | -4.1430069911 | -1.8612906132 | -5.6305672103 |
| H | -5.6466926566 | -2.7688194162 | -5.3422000500 |
| H | -4.2953310479 | -4.6907448692 | -3.2460793518 |
| H | 3.4036544718  | 5.6712021876  | 3.0857287863  |
| H | 2.1272010852  | 4.7453713189  | 3.8890357369  |

|   |               |               |              |
|---|---------------|---------------|--------------|
| H | 4.0652546703  | 3.5545739943  | 2.1579750456 |
| H | -6.3390460592 | 1.9796941348  | 2.7286693250 |
| H | -5.5061306768 | 0.7890092513  | 3.7253832885 |
| H | -4.4892755316 | 3.3088280989  | 2.9136988612 |
| H | -0.9716222129 | 5.1110142956  | 3.1706868878 |
| H | -2.6435871317 | 5.3723228032  | 3.7023213548 |
| H | -2.7128821611 | 3.0009655237  | 3.9050432037 |
| H | 4.3731049452  | 1.0736988720  | 4.3515821243 |
| H | 3.5915296455  | 2.4782384108  | 4.1762837791 |
| H | 5.1173493120  | 2.4416919370  | 6.1216979226 |
| H | 3.4621214860  | 2.9902671588  | 6.4566067205 |
| H | 3.9528103462  | 1.3426152952  | 6.9079035365 |
| H | 0.3663025348  | -2.5940537225 | 3.0075131931 |
| H | 0.5388789833  | -2.6642323024 | 0.5336230323 |
| H | -0.3714715206 | 1.6414275257  | 2.7913283510 |
| H | 4.4637774797  | -0.5702086196 | 5.9475300214 |
| H | 4.3037607552  | -2.8693991804 | 6.7802980941 |
| H | 2.1627027838  | -4.1235382145 | 6.5894301634 |
| H | 0.1804588555  | -3.0305466258 | 5.5756268930 |
| H | -0.9140859257 | -1.0365488928 | 4.8934886196 |
| H | -0.9439833525 | 1.5092913095  | 4.8640409649 |
| H | -0.3674466112 | 0.7504433214  | 6.3313459930 |
| H | 1.0452966606  | 2.6020488684  | 4.5202606559 |
| H | 1.3949841702  | 2.1656340715  | 6.1902864937 |
| H | 2.2646012861  | 0.7736309791  | 3.6319741098 |

2-HP-B-CD:trans-(1R,4S)-SRT\_3\_MD E(Ha)= -7253.92106006

|    |               |                |               |
|----|---------------|----------------|---------------|
| C  | 0.5852854777  | -1.7634235740  | 2.4505580499  |
| C  | -0.3400985504 | -2.5324505843  | 3.3862898080  |
| C  | -0.6422003814 | -3.8922375929  | 3.1786804819  |
| C  | -0.1249691163 | -4.6293649935  | 1.9569956568  |
| C  | 1.1622535937  | -3.9799477653  | 1.4463471388  |
| C  | 0.9447109256  | -2.5089759802  | 1.1725879878  |
| C  | -0.8604966542 | -1.8795351352  | 4.5119118703  |
| C  | -1.6930180448 | -2.5388401527  | 5.4101030858  |
| C  | -1.9997212595 | -3.8824185850  | 5.2028070917  |
| C  | -1.4695525246 | -4.5439398958  | 4.1006117307  |
| C  | 0.0942360936  | -6.1147864392  | 2.1358206389  |
| C  | -0.4149762215 | -7.0144909976  | 1.1948509596  |
| C  | -0.1302425736 | -8.3729469093  | 1.2827794732  |
| C  | 0.6673980989  | -8.8629607364  | 2.3150839793  |
| C  | 1.1751821982  | -7.9715937027  | 3.2679745796  |
| C  | 0.8880186224  | -6.6127328960  | 3.1706256674  |
| Cl | 1.0024304233  | -10.5545039075 | 2.3945106156  |
| Cl | 2.1662924321  | -8.5241833106  | 4.5712599542  |
| N  | -0.0394515330 | -0.4499958864  | 2.1017713976  |
| C  | 0.7169449592  | 0.4052200774   | 1.1637005139  |
| C  | 1.3173897297  | -2.0059553961  | -4.6013568324 |
| C  | 2.3661135960  | -2.9251632968  | -3.9791788679 |
| C  | 1.7726249282  | -4.1796760039  | -3.3422604053 |
| C  | 0.6177665592  | -4.7764021242  | -4.1403528736 |
| C  | -0.3473384017 | -3.6854313648  | -4.6106281309 |
| O  | 0.3625674159  | -2.7464407183  | -5.3645252473 |
| O  | -0.9127627903 | -3.0643049831  | -3.4794351724 |
| C  | -2.2715581379 | -3.3215873375  | -3.1641454568 |
| C  | -2.3176507933 | -3.4227060843  | -1.6472980365 |
| C  | -3.7510394450 | -3.4852856456  | -1.1582083715 |
| C  | -4.5319855231 | -2.2965742085  | -1.7496532021 |
| O  | -4.4927980331 | -2.3655425224  | -3.1439984428 |
| C  | -3.1768153509 | -2.2073422444  | -3.6883482781 |
| O  | -3.9660940193 | -1.0665707182  | -1.3591274401 |
| C  | -4.4209732258 | -0.4485344310  | -0.1711025308 |
| C  | -3.1862460713 | 0.0433649137   | 0.5736967668  |
| C  | -3.5586752645 | 0.9587472174   | 1.7364708974  |
| C  | -4.5148399061 | 2.0590240428   | 1.2442972899  |
| O  | -5.6451667347 | 1.4753712064   | 0.6421833045  |
| C  | -5.3604977583 | 0.7032964491   | -0.5222902780 |
| O  | -3.7848885249 | 2.8568776146   | 0.3564074735  |
| C  | -4.1929456336 | 4.2114185648   | 0.1996190077  |
| C  | -3.6858152883 | 5.0562542815   | 1.3629679735  |
| C  | -3.6957149313 | 6.5335971969   | 1.0038391294  |
| C  | -2.8704590482 | 6.7296380968   | -0.2651139538 |
| O  | -3.5101154424 | 6.0530870648   | -1.3116953219 |
| C  | -3.5588825222 | 4.6348849292   | -1.1376270430 |
| O  | -1.6036766312 | 6.1905201626   | -0.0124750309 |
| C  | -0.4094881265 | 6.9247087990   | -0.2387851450 |
| C  | 0.4170424407  | 6.6658988480   | 1.0175570047  |
| C  | 1.8417966690  | 7.1599998161   | 0.8707956770  |
| C  | 2.4394785851  | 6.5871765851   | -0.4217548804 |
| O  | 1.6430412372  | 6.9287836964   | -1.5166176362 |
| C  | 0.3093923312  | 6.4133246633   | -1.4826533273 |
| O  | 2.5134871456  | 5.1812128816   | -0.2917063716 |
| C  | 3.7912273537  | 4.5946695745   | -0.1102211745 |

|   |               |               |               |
|---|---------------|---------------|---------------|
| C | 3.6309619546  | 3.5245818490  | 0.9585455729  |
| C | 4.9030013695  | 2.6993605438  | 1.0929569664  |
| C | 5.3625210805  | 2.1722148541  | -0.2705068200 |
| O | 5.4925888783  | 3.2470476096  | -1.1676099144 |
| C | 4.2915138579  | 3.9807231136  | -1.4151462251 |
| O | 4.4465781067  | 1.2148898831  | -0.7125795503 |
| C | 4.9509096460  | -0.0157511980 | -1.2356810111 |
| C | 4.1347695837  | -1.1225865770 | -0.5780853357 |
| C | 4.5668404366  | -2.4522563874 | -1.1769607296 |
| C | 4.3576286956  | -2.3932689981 | -2.7002438089 |
| O | 5.1644682449  | -1.3658479689 | -3.2341793929 |
| C | 4.8658261772  | -0.0531559741 | -2.7615445687 |
| O | 3.0081751171  | -2.1579023966 | -2.9662015211 |
| O | 3.8739024977  | -3.5168642846 | -0.5712280743 |
| C | 4.6113776183  | -4.7227130962 | -0.6010541848 |
| C | 3.8517884924  | -5.8283680782 | 0.1035861003  |
| O | 2.6524427570  | -6.0653876752 | -0.6340872573 |
| O | 4.3334099655  | -1.1281337432 | 0.8142365730  |
| O | 4.7312307407  | 1.5927391768  | 1.9598341740  |
| C | 4.8978493971  | 1.8575428924  | 3.3503407601  |
| C | 3.6757251727  | 1.4257896126  | 4.1618653586  |
| O | 2.4771771689  | 1.9792817812  | 3.6333236588  |
| O | 3.3334089000  | 4.0971502088  | 2.2219200861  |
| O | 2.5733630652  | 6.7062226300  | 1.9984968093  |
| C | 3.4174244375  | 7.6252912943  | 2.6766084585  |
| C | 4.8584807248  | 7.5577459308  | 2.2030651289  |
| O | 4.8529146034  | 7.9827812675  | 0.8520227179  |
| O | -0.1834472229 | 7.2531547227  | 2.1536015095  |
| O | -3.1530067503 | 7.2481717641  | 2.1022946587  |
| C | -3.6487674791 | 8.5876173558  | 2.2276838029  |
| C | -2.5348917807 | 9.5416654088  | 2.6332912472  |
| O | -1.5509720447 | 9.5953840649  | 1.6214658997  |
| O | -4.4732492912 | 4.8229393863  | 2.5162474884  |
| O | -2.3532246567 | 1.4768195885  | 2.2706324161  |
| C | -2.4553669091 | 1.9650921131  | 3.5953706406  |
| C | -1.1090759935 | 2.4896180338  | 4.0735598816  |
| O | -0.1848090976 | 1.4063134354  | 4.1241764852  |
| O | -2.3876107020 | -1.0469830526 | 0.9876741355  |
| O | -3.7060601348 | -3.4630984641 | 0.2477407769  |
| C | -4.8626398226 | -3.8938303330 | 0.9262257752  |
| C | -4.5132415224 | -3.8930790200 | 2.3994145546  |
| O | -4.0467470867 | -2.5776136874 | 2.7087111247  |
| O | -1.6123110475 | -4.5749538914 | -1.2057826911 |
| O | -0.0450522797 | -5.6933102460 | -3.2838729020 |
| C | -0.6582960256 | -6.7966524418 | -3.9440519005 |
| C | -1.5380935274 | -7.5480746766 | -2.9565682802 |
| O | -2.6588878005 | -6.7817220919 | -2.5756540177 |
| O | 2.8087700523  | -5.1162026298 | -3.1940877885 |
| C | 1.9120679922  | -1.0009461778 | -5.5683999277 |
| O | 0.9463964966  | -0.0972849783 | -6.0390738170 |
| C | -3.3361419934 | -2.2440663821 | -5.1968647736 |
| O | -3.7463948181 | -3.5075705956 | -5.6631152412 |
| C | -6.6978548019 | 0.2212851590  | -1.0537477502 |
| O | -7.3089758799 | -0.7183082636 | -0.1959693581 |
| C | -4.3385455663 | 4.1232311071  | -2.3352883890 |
| O | -5.6578549008 | 4.6071943646  | -2.3528312786 |
| C | -0.3307527944 | 6.8539263657  | -2.7862548979 |
| O | 0.3312439440  | 6.3033383397  | -3.8937500610 |

|   |               |               |               |
|---|---------------|---------------|---------------|
| C | 4.6597499516  | 5.0346171105  | -2.4432253797 |
| O | 5.6669927465  | 5.9003616389  | -1.9673211246 |
| C | 5.9056758750  | 0.8388737044  | -3.4204230883 |
| O | 7.2110712640  | 0.4529076708  | -3.0596520731 |
| C | 4.6868969119  | -7.0939035942 | 0.2012956923  |
| C | 5.7643006329  | 8.4250321361  | 3.0622146199  |
| C | -3.0881787293 | 10.9397963559 | 2.8456639760  |
| C | -0.5786818126 | 3.6368384872  | 3.2305474260  |
| C | -5.6936651437 | -4.2733745679 | 3.2733685271  |
| C | 3.5221301833  | -0.0815627370 | 4.2342267686  |
| C | -2.0493459053 | -8.8382108152 | -3.5704532597 |
| H | 4.6957757357  | -3.3153874241 | -3.1805533103 |
| H | 5.6487879712  | -2.5638417173 | -0.9995722503 |
| H | 3.0742493091  | -0.9595285546 | -0.8282303909 |
| H | 6.0042033645  | -0.1358558840 | -0.9479651808 |
| H | 6.3645743122  | 1.7373574944  | -0.1893689730 |
| H | 5.6997058397  | 3.3555030428  | 1.4716929274  |
| H | 2.8152457332  | 2.8580093935  | 0.6436692138  |
| H | 4.5148333282  | 5.3487169614  | 0.2243440557  |
| H | 3.4268305172  | 7.0174302813  | -0.6005850548 |
| H | 1.8650316927  | 8.2553827604  | 0.8206233504  |
| H | 0.4634349715  | 5.5746648522  | 1.1476584275  |
| H | -0.6297384634 | 7.9985511882  | -0.3255361417 |
| H | -2.8058986084 | 7.7825054815  | -0.5612750904 |
| H | -4.7291779681 | 6.8527103282  | 0.8150354635  |
| H | -2.6473282943 | 4.7527723427  | 1.5441133598  |
| H | -5.2860168645 | 4.2866415606  | 0.1288063718  |
| H | -4.9073115320 | 2.6551184415  | 2.0718494725  |
| H | -4.0934379503 | 0.3698204641  | 2.4981418499  |
| H | -2.5745129526 | 0.6249216040  | -0.1255863524 |
| H | -4.9647322240 | -1.1533515736 | 0.4678660407  |
| H | -5.5909792581 | -2.3419716590 | -1.4656111719 |
| H | -4.2247118152 | -4.4140419429 | -1.5163421282 |
| H | -1.8650544138 | -2.5211429882 | -1.2137866112 |
| H | -2.5933408813 | -4.2808134101 | -3.5913093129 |
| H | -1.1327493021 | -4.0816334682 | -5.2648835790 |
| H | 1.0263397346  | -5.2981254092 | -5.0159167832 |
| H | 1.3777746222  | -3.8644914851 | -2.3666151104 |
| H | 3.0916860644  | -3.2370549917 | -4.7449369756 |
| H | 0.7981416515  | -1.4705483596 | -3.7981389579 |
| H | -2.7647586528 | -1.2360745946 | -3.3884535239 |
| H | -4.8781367826 | 1.3252919011  | -1.2863816225 |
| H | -2.5394447505 | 4.2292763190  | -1.1589543282 |
| H | 0.3410187588  | 5.3164194343  | -1.4512120404 |
| H | 3.5157584598  | 3.3185019432  | -1.8230945017 |
| H | 3.8553006289  | 0.2511585576  | -3.0684904596 |
| H | 4.4018535675  | -0.1999848114 | 1.0950846789  |
| H | -2.9492544053 | -1.7269673192 | 1.4210384274  |
| H | 2.6443629412  | -5.6181243466 | -2.3766807335 |
| H | 2.9240413978  | 4.9814692852  | 2.0966783759  |
| H | -1.1146526080 | 6.9655035765  | 2.1613311105  |
| H | -4.2025249834 | 5.4946741339  | 3.1559486783  |
| H | -0.8744141336 | -4.7188381770 | -1.8296702893 |
| H | 5.5743544906  | -4.5879119817 | -0.0850180450 |
| H | 4.8148636105  | -5.0347530504 | -1.6353211392 |
| H | 3.5911424807  | -5.4732278580 | 1.1101041942  |
| H | 4.9705891249  | -7.4482496678 | -0.7943743505 |
| H | 4.1226474454  | -7.8891485384 | 0.6991830947  |

|   |               |               |               |
|---|---------------|---------------|---------------|
| H | 5.5959674157  | -6.9228324615 | 0.7852135802  |
| H | 2.1371627524  | -6.7492123243 | -0.1898535762 |
| H | 3.3688078645  | 7.3671726793  | 3.7391971232  |
| H | 3.0331495171  | 8.6457610236  | 2.5541556039  |
| H | 5.1725902909  | 6.5028124354  | 2.2736986101  |
| H | 5.4367686347  | 9.4685600426  | 3.0303142697  |
| H | 6.7943262203  | 8.3859680545  | 2.6949883761  |
| H | 5.7710937767  | 8.0897504084  | 4.1040395027  |
| H | 5.7101127763  | 7.8031243163  | 0.4512281665  |
| H | -4.4640683715 | 8.5977206094  | 2.9634787803  |
| H | -4.0474037771 | 8.9284307310  | 1.2644188337  |
| H | -2.0959056123 | 9.1777146002  | 3.5758469074  |
| H | -3.5152139881 | 11.3222929915 | 1.9131743722  |
| H | -2.2804659131 | 11.6117114962 | 3.1427516966  |
| H | -3.8614055579 | 10.9575380276 | 3.6193485742  |
| H | -0.8749672860 | 8.9313833635  | 1.8372029691  |
| H | -2.7884682329 | 1.1586601613  | 4.2676779077  |
| H | -3.1826261962 | 2.7878159695  | 3.6555156983  |
| H | -1.2782879113 | 2.8535142360  | 5.0992155032  |
| H | -1.2375994609 | 4.5054430587  | 3.3149769451  |
| H | -0.5137912910 | 3.3513277606  | 2.1774855178  |
| H | 0.4112083223  | 3.9482995352  | 3.5770130643  |
| H | 0.7411320962  | 1.7333256678  | 4.1214979376  |
| H | -4.0382024897 | -1.4505311266 | -5.4904562563 |
| H | -2.3698461876 | -2.0276813640 | -5.6629738347 |
| H | -4.5898087123 | -3.7010048707 | -5.2369255714 |
| H | -7.3380306089 | 1.0977816520  | -1.2222454090 |
| H | -6.5461221403 | -0.2740222235 | -2.0170560470 |
| H | -7.4896723878 | -0.2588379476 | 0.6322382878  |
| H | -5.1522443344 | -4.9083874652 | 0.6149122494  |
| H | -5.7193731391 | -3.2251079321 | 0.7428589249  |
| H | -3.6893061025 | -4.6060798308 | 2.5401555840  |
| H | -6.0554918227 | -5.2781704644 | 3.0343600383  |
| H | -6.5152818300 | -3.5637913522 | 3.1390424844  |
| H | -5.4071776745 | -4.2662069565 | 4.3293650307  |
| H | -3.5633032806 | -2.6255366763 | 3.5448176743  |
| H | -3.7882978498 | 4.3950419321  | -3.2478936982 |
| H | -4.3910591193 | 3.0332442810  | -2.2891890579 |
| H | -5.5936939218 | 5.5677769415  | -2.4087948371 |
| H | 5.0754762109  | 2.9267664279  | 3.4996031386  |
| H | 5.7753126525  | 1.3079280448  | 3.7154172061  |
| H | 3.8420119236  | 1.8092759127  | 5.1823128560  |
| H | 4.3567289258  | -0.5250502966 | 4.7848942362  |
| H | 3.5017198553  | -0.5267435307 | 3.2350504546  |
| H | 2.5995438348  | -0.3383189974 | 4.7639213464  |
| H | 2.6885204592  | 2.8383577617  | 3.2037666772  |
| H | -1.3670510937 | 6.5038407243  | -2.8173541269 |
| H | -0.3434829756 | 7.9559438354  | -2.8176624705 |
| H | 1.2409146264  | 6.6191639726  | -3.8492577128 |
| H | 0.1252364112  | -7.4555509233 | -4.3448232056 |
| H | -1.2858294969 | -6.4534826869 | -4.7792301618 |
| H | -0.9125641281 | -7.7858918656 | -2.0777411495 |
| H | -2.7069914692 | -9.3457479653 | -2.8613533631 |
| H | -1.2285658364 | -9.5116783967 | -3.8328947289 |
| H | -2.6305863673 | -8.6260127294 | -4.4733421800 |
| H | -2.3551578317 | -6.0611781993 | -1.9964184351 |
| H | 4.9656820752  | 4.5342850490  | -3.3726241299 |
| H | 3.7789252629  | 5.6439246847  | -2.6648121148 |



|   |               |               |               |
|---|---------------|---------------|---------------|
| H | 6.4431081276  | 5.3470915454  | -1.8178257175 |
| H | 2.6825563166  | -0.4225539648 | -5.0516330931 |
| H | 2.3992624398  | -1.5492400646 | -6.3915436607 |
| H | 0.2601873539  | -0.6349322237 | -6.4512408746 |
| H | 5.7557147222  | 0.8034736281  | -4.5093982909 |
| H | 5.7724153647  | 1.8697733669  | -3.0835758556 |
| H | 7.3001727793  | -0.4676421563 | -3.3353909517 |
| H | -0.9924746535 | -0.6453975929 | 1.6976931854  |
| H | -0.1969334767 | 0.1416453004  | 2.9437121500  |
| H | 0.1170031243  | 1.3032696561  | 1.0106645140  |
| H | 1.6781659079  | 0.6730011969  | 1.6059083906  |
| H | 0.8560324946  | -0.1045833202 | 0.2120036164  |
| H | -1.0430537542 | -6.6453386262 | 0.3879892277  |
| H | -0.5334278592 | -9.0711715346 | 0.5564119729  |
| H | 1.2921949207  | -5.9426626421 | 3.9233282034  |
| H | -0.6106109539 | -0.8384710629 | 4.7057726733  |
| H | -2.0787168797 | -2.0132604153 | 6.2786574842  |
| H | -2.6305879463 | -4.4180703478 | 5.9065117648  |
| H | -1.6901735105 | -5.5968743756 | 3.9502331556  |
| H | -0.8807036632 | -4.5112579090 | 1.1662164784  |
| H | 1.9627872177  | -4.1083712089 | 2.1878254108  |
| H | 1.4965748296  | -4.4727552326 | 0.5309618076  |
| H | 1.8571333841  | -2.0889907575 | 0.7438002845  |
| H | 0.1317388580  | -2.4046408307 | 0.4410646722  |
| H | 1.5067939172  | -1.5294275731 | 2.9957887631  |

2-HP-B-CD:trans-(1R,4S)-SRT\_4\_MD E(Ha)= -7253.9144206290

|    |             |              |             |
|----|-------------|--------------|-------------|
| C  | 0.77201456  | -1.67064059  | 2.29032958  |
| C  | 0.09242588  | -2.41853671  | 3.43131722  |
| C  | -0.16022581 | -3.80276721  | 3.36006928  |
| C  | 0.17433223  | -4.60593211  | 2.11683129  |
| C  | 1.25056016  | -3.90082565  | 1.29050218  |
| C  | 0.85269119  | -2.47190922  | 0.99984555  |
| C  | -0.25051886 | -1.71971939  | 4.59693102  |
| C  | -0.86532776 | -2.35862740  | 5.66908552  |
| C  | -1.13226964 | -3.72476163  | 5.59413698  |
| C  | -0.77291075 | -4.43037288  | 4.45127681  |
| C  | 0.60962512  | -6.03375348  | 2.36313508  |
| C  | 0.09442948  | -7.06812256  | 1.57586187  |
| C  | 0.58473675  | -8.36469973  | 1.69443673  |
| C  | 1.59902985  | -8.65674926  | 2.60538070  |
| C  | 2.11254461  | -7.63060787  | 3.40805519  |
| C  | 1.61824844  | -6.33499585  | 3.27991248  |
| Cl | 2.18942177  | -10.27369085 | 2.72271927  |
| Cl | 3.36525351  | -7.93618874  | 4.55719173  |
| N  | 0.05298437  | -0.38468549  | 2.02779043  |
| C  | 0.58419742  | 0.41987413   | 0.90746159  |
| C  | 0.35513759  | -2.17380167  | -4.48105576 |
| C  | 1.54834387  | -3.03022085  | -4.06314459 |
| C  | 1.14183575  | -4.29185220  | -3.30489729 |
| C  | -0.09048989 | -4.96649757  | -3.89839321 |
| C  | -1.18677002 | -3.94961724  | -4.22110226 |
| O  | -0.67237730 | -2.97060820  | -5.07570733 |
| O  | -1.62272540 | -3.35442139  | -3.02262493 |
| C  | -2.90530105 | -3.68947177  | -2.51493680 |
| C  | -2.71592308 | -3.73513084  | -1.00579568 |
| C  | -4.04358970 | -3.80387610  | -0.27613471 |
| C  | -4.95056889 | -2.67856477  | -0.80919515 |
| O  | -5.14555564 | -2.85595044  | -2.18169796 |
| C  | -3.94871059 | -2.66024090  | -2.94375132 |
| O  | -4.35771448 | -1.41655524  | -0.62122107 |
| C  | -4.63471121 | -0.67490082  | 0.54898087  |
| C  | -3.30658911 | -0.12653860  | 1.05482752  |
| C  | -3.52149235 | 0.90009076   | 2.16207946  |
| C  | -4.48900330 | 1.97663574   | 1.64792061  |
| O  | -5.70989557 | 1.38001925   | 1.28640416  |
| C  | -5.61549493 | 0.45021095   | 0.20868495  |
| O  | -3.83395839 | 2.58256028   | 0.56818128  |
| C  | -4.28535583 | 3.85624107   | 0.12949610  |
| C  | -3.79489908 | 4.95804950   | 1.06461797  |
| C  | -3.88624222 | 6.32038347   | 0.39343554  |
| C  | -3.12727651 | 6.27154140   | -0.93111396 |
| O  | -3.75666695 | 5.34151189   | -1.76325712 |
| C  | -3.67190126 | 4.00079149   | -1.27382879 |
| O  | -1.81290718 | 5.87064274   | -0.65674114 |
| C  | -0.70425094 | 6.72422456   | -0.89767318 |
| C  | 0.16444415  | 6.56855592   | 0.35120644  |
| C  | 1.54246201  | 7.16275308   | 0.14486950  |
| C  | 2.14243786  | 6.59262670   | -1.14569220 |
| O  | 1.31537472  | 6.90084203   | -2.22869745 |
| C  | 0.02942790  | 6.28010472   | -2.16131278 |
| O  | 2.24498968  | 5.19795972   | -0.99042832 |
| C  | 3.53210273  | 4.61476469   | -0.89010020 |

|   |             |             |             |
|---|-------------|-------------|-------------|
| C | 3.45789252  | 3.57390581  | 0.21497044  |
| C | 4.77094364  | 2.80437718  | 0.27577352  |
| C | 5.10570585  | 2.22036217  | -1.09998437 |
| O | 5.15265821  | 3.25626949  | -2.04830133 |
| C | 3.91861305  | 3.95706830  | -2.21320332 |
| O | 4.14351104  | 1.25542800  | -1.40860699 |
| C | 4.56612820  | 0.01449544  | -1.97433979 |
| C | 3.92023775  | -1.08029843 | -1.13060199 |
| C | 4.24291041  | -2.42375686 | -1.76650288 |
| C | 3.72862232  | -2.41729975 | -3.21606053 |
| O | 4.38450174  | -1.39926607 | -3.93747592 |
| C | 4.17330015  | -0.07512563 | -3.44962323 |
| O | 2.34552898  | -2.21735348 | -3.20936016 |
| O | 3.70038811  | -3.47910199 | -1.01081345 |
| C | 4.47253503  | -4.65933877 | -1.09897769 |
| C | 3.88615624  | -5.74614274 | -0.22122135 |
| O | 2.61518968  | -6.10044165 | -0.76441202 |
| O | 4.39469205  | -1.03997868 | 0.19131203  |
| O | 4.72966005  | 1.74440688  | 1.21282912  |
| C | 5.02763324  | 2.10079867  | 2.55828713  |
| C | 3.92965348  | 1.63969514  | 3.51470552  |
| O | 2.65547577  | 2.11253838  | 3.09937798  |
| O | 3.19789330  | 4.16278919  | 1.47718982  |
| O | 2.37312070  | 6.80870567  | 1.23728399  |
| C | 3.20032611  | 7.85191602  | 1.73195652  |
| C | 4.40019083  | 7.25649926  | 2.43713392  |
| O | 5.18263937  | 6.63164120  | 1.43286576  |
| O | -0.44530646 | 7.16489674  | 1.47847000  |
| O | -3.32178787 | 7.26789914  | 1.28550721  |
| C | -3.81290935 | 8.59904268  | 1.09296549  |
| C | -2.80310632 | 9.61785367  | 1.60030763  |
| O | -1.62969049 | 9.59257216  | 0.81931766  |
| O | -4.54462348 | 4.94434200  | 2.26156617  |
| O | -2.25465515 | 1.42490116  | 2.50709962  |
| C | -2.18374184 | 2.01234048  | 3.79073416  |
| C | -0.80154761 | 2.61131759  | 4.00631944  |
| O | 0.15125918  | 1.55406793  | 3.97878590  |
| O | -2.43695737 | -1.16445778 | 1.45152876  |
| O | -3.76277970 | -3.67432600 | 1.09668920  |
| C | -4.78939217 | -4.02226661 | 1.99502583  |
| C | -4.19688796 | -3.91126798 | 3.38563504  |
| O | -3.70208109 | -2.57582355 | 3.51865075  |
| O | -1.90365343 | -4.84728520 | -0.65249405 |
| O | -0.55645285 | -5.90997592 | -2.94635104 |
| C | -1.20241659 | -7.04335121 | -3.51773849 |
| C | -1.87204271 | -7.85757511 | -2.42102746 |
| O | -2.95595067 | -7.16565681 | -1.84406473 |
| O | 2.23607796  | -5.17105028 | -3.30884858 |
| C | 0.70330214  | -1.12917502 | -5.52445019 |
| O | -0.39517638 | -0.30510873 | -5.81359327 |
| C | -4.34275239 | -2.79273623 | -4.40315199 |
| O | -4.69991899 | -4.10717485 | -4.75685885 |
| C | -7.02191321 | -0.06897537 | -0.02762422 |
| O | -7.48972091 | -0.84915019 | 1.05066642  |
| C | -4.36174283 | 3.13935695  | -2.31528508 |
| O | -5.74833050 | 3.36039701  | -2.37436361 |
| C | -0.68101275 | 6.66369694  | -3.44707259 |
| O | 0.02818128  | 6.22376870  | -4.57303824 |

|   |             |             |             |
|---|-------------|-------------|-------------|
| C | 4.14015609  | 4.97288615  | -3.31873659 |
| O | 5.06978546  | 5.96403530  | -2.95314151 |
| C | 5.04322098  | 0.80093569  | -4.33746271 |
| O | 6.39614767  | 0.42574049  | -4.25086768 |
| C | 4.80412980  | -6.95632961 | -0.15968523 |
| C | 5.18287366  | 8.33245400  | 3.17357201  |
| C | -3.38740130 | 11.01730548 | 1.51844970  |
| C | -0.47442052 | 3.70323554  | 2.99947018  |
| C | -5.20932107 | -4.22626830 | 4.47140346  |
| C | 3.87027552  | 0.12949273  | 3.64830798  |
| C | -2.41249736 | -9.15999807 | -2.98316124 |
| H | 3.98021445  | -3.35241576 | -3.72365373 |
| H | 5.33959410  | -2.52025495 | -1.80910826 |
| H | 2.82835129  | -0.93510324 | -1.16710068 |
| H | 5.65870587  | -0.07453694 | -1.90114029 |
| H | 6.10893149  | 1.77973678  | -1.09329659 |
| H | 5.57351967  | 3.50825194  | 0.53802827  |
| H | 2.65352469  | 2.86547234  | -0.03114047 |
| H | 4.28039160  | 5.37212580  | -0.62442034 |
| H | 3.12246419  | 7.03203645  | -1.36362542 |
| H | 1.46456518  | 8.25428455  | 0.06052037  |
| H | 0.29144832  | 5.49019649  | 0.52208448  |
| H | -1.03063823 | 7.77165549  | -0.97987339 |
| H | -3.14615487 | 7.23225983  | -1.45902657 |
| H | -4.94043454 | 6.56249189  | 0.19955495  |
| H | -2.73435874 | 4.75416708  | 1.27070735  |
| H | -5.38063088 | 3.88005154  | 0.05992731  |
| H | -4.74540462 | 2.71206319  | 2.41450529  |
| H | -3.98395987 | 0.40650637  | 3.03146958  |
| H | -2.81064188 | 0.38370780  | 0.22150555  |
| H | -5.08516457 | -1.30197905 | 1.32759770  |
| H | -5.94410860 | -2.71565024 | -0.34515578 |
| H | -4.53846738 | -4.76658035 | -0.48399060 |
| H | -2.22678571 | -2.80413127 | -0.69097608 |
| H | -3.21925961 | -4.68235087 | -2.86332489 |
| H | -2.02915107 | -4.41257449 | -4.74840646 |
| H | 0.20674337  | -5.47606755 | -4.82515863 |
| H | 0.89429691  | -3.96964176 | -2.28337378 |
| H | 2.12054037  | -3.32995772 | -4.95386867 |
| H | -0.04637791 | -1.67090032 | -3.59267548 |
| H | -3.55515814 | -1.65206773 | -2.76848966 |
| H | -5.26834829 | 0.95634896  | -0.69931640 |
| H | -2.61744430 | 3.70440208  | -1.20775130 |
| H | 0.15319708  | 5.19065896  | -2.13266942 |
| H | 3.12530927  | 3.25837785  | -2.51391859 |
| H | 3.11599599  | 0.20754794  | -3.55245024 |
| H | 4.43665513  | -0.10514433 | 0.45307944  |
| H | -2.90250780 | -1.79829510 | 2.04147181  |
| H | 2.25536762  | -5.64006511 | -2.45664589 |
| H | 2.85867966  | 5.07425063  | 1.35927469  |
| H | -1.38681508 | 6.91288044  | 1.46688948  |
| H | -4.29325251 | 5.74362908  | 2.74133380  |
| H | -1.24375689 | -4.95082267 | -1.36447086 |
| H | 5.50094464  | -4.46179128 | -0.75983084 |
| H | 4.51648235  | -5.02722149 | -2.13456305 |
| H | 3.74561052  | -5.33104925 | 0.78653186  |
| H | 4.97897535  | -7.36130004 | -1.16128044 |
| H | 4.35840157  | -7.74590704 | 0.45379475  |

|   |             |             |             |
|---|-------------|-------------|-------------|
| H | 5.76852983  | -6.69854287 | 0.28793012  |
| H | 2.19667427  | -6.75641821 | -0.19480928 |
| H | 2.62260335  | 8.47877526  | 2.42385704  |
| H | 3.56603991  | 8.47797113  | 0.90691457  |
| H | 4.03448357  | 6.50629623  | 3.15824786  |
| H | 5.52372770  | 9.10587454  | 2.47830877  |
| H | 6.06517268  | 7.90257326  | 3.65943590  |
| H | 4.57751357  | 8.80306602  | 3.95401938  |
| H | 6.00234382  | 6.33363578  | 1.83890551  |
| H | -4.77468132 | 8.70225281  | 1.61441650  |
| H | -3.97642263 | 8.78956453  | 0.02420392  |
| H | -2.57549763 | 9.37944946  | 2.65233417  |
| H | -3.61605444 | 11.27066016 | 0.47821989  |
| H | -2.65565595 | 11.74031484 | 1.88464490  |
| H | -4.30114572 | 11.11173092 | 2.11221419  |
| H | -1.07050145 | 8.86196285  | 1.13330298  |
| H | -2.38022927 | 1.25445996  | 4.56523631  |
| H | -2.92603576 | 2.81615447  | 3.90280271  |
| H | -0.81296078 | 3.04992432  | 5.01653849  |
| H | -1.14857024 | 4.55481355  | 3.13027567  |
| H | -0.58373188 | 3.33413144  | 1.97641935  |
| H | 0.54542290  | 4.07443045  | 3.13619273  |
| H | 1.06047020  | 1.89616264  | 3.82515622  |
| H | -5.15358125 | -2.07827805 | -4.60591886 |
| H | -3.48815532 | -2.51466195 | -5.02790148 |
| H | -5.45545779 | -4.35254656 | -4.21085125 |
| H | -7.67859195 | 0.78850093  | -0.22835591 |
| H | -7.02620928 | -0.70720960 | -0.91598577 |
| H | -7.51619952 | -0.26613260 | 1.81791641  |
| H | -5.13740241 | -5.05179759 | 1.82316238  |
| H | -5.65933454 | -3.35158794 | 1.90723006  |
| H | -3.35167965 | -4.61079304 | 3.43884913  |
| H | -5.59605626 | -5.24472309 | 4.36673156  |
| H | -6.04944625 | -3.52678011 | 4.42946380  |
| H | -4.74880166 | -4.14551954 | 5.46069798  |
| H | -3.05108836 | -2.57223348 | 4.23317251  |
| H | -3.87326881 | 3.32185918  | -3.28338349 |
| H | -4.21204369 | 2.08712401  | -2.06080402 |
| H | -5.87527899 | 4.27287826  | -2.65639125 |
| H | 5.14011196  | 3.18711926  | 2.63175172  |
| H | 5.97618051  | 1.63289656  | 2.85474380  |
| H | 4.18386602  | 2.06931167  | 4.49827516  |
| H | 4.78899533  | -0.25038186 | 4.10477532  |
| H | 3.75582971  | -0.34785243 | 2.67035350  |
| H | 3.03444159  | -0.16072676 | 4.29262766  |
| H | 2.77002617  | 2.94619063  | 2.58981142  |
| H | -1.66290708 | 6.17997111  | -3.47113147 |
| H | -0.83586036 | 7.75577532  | -3.45760099 |
| H | 0.89092613  | 6.65146945  | -4.53484558 |
| H | -0.45550633 | -7.65160599 | -4.04793173 |
| H | -1.97376868 | -6.73214117 | -4.23679217 |
| H | -1.10245131 | -8.08222823 | -1.66079564 |
| H | -2.90664205 | -9.72472365 | -2.18948562 |
| H | -1.61611282 | -9.77640210 | -3.40962019 |
| H | -3.15472446 | -8.95617006 | -3.76140522 |
| H | -2.61325853 | -6.42366010 | -1.31789000 |
| H | 4.44561422  | 4.44033583  | -4.23092524 |
| H | 3.19276404  | 5.47890225  | -3.52638986 |

|   |             |             |             |
|---|-------------|-------------|-------------|
| H | 5.90841012  | 5.51606791  | -2.79468036 |
| H | 1.50359790  | -0.49093365 | -5.14067210 |
| H | 1.08284437  | -1.64109676 | -6.42410611 |
| H | -1.10065996 | -0.89592924 | -6.10067670 |
| H | 4.66498464  | 0.73460497  | -5.36842257 |
| H | 4.97853393  | 1.84132567  | -4.00996871 |
| H | 6.42823088  | -0.50471266 | -4.50339429 |
| H | -0.95676430 | -0.62385815 | 1.84398188  |
| H | 0.04971268  | 0.25105109  | 2.85470497  |
| H | 0.00290146  | 1.34143768  | 0.86961210  |
| H | 1.63491234  | 0.65281009  | 1.09036715  |
| H | 0.46927962  | -0.11765174 | -0.03259541 |
| H | -0.69961218 | -6.85486147 | 0.86449106  |
| H | 0.17875221  | -9.16813303 | 1.08813390  |
| H | 2.03430563  | -5.55645726 | 3.91245557  |
| H | -0.03370982 | -0.65721334 | 4.68321218  |
| H | -1.11371322 | -1.79645353 | 6.56460045  |
| H | -1.59534353 | -4.24249604 | 6.42946840  |
| H | -0.95769371 | -5.49996579 | 4.40098005  |
| H | -0.73601396 | -4.64302103 | 1.49972940  |
| H | 2.20361519  | -3.91291158 | 1.83617579  |
| H | 1.42142780  | -4.43943656 | 0.35619192  |
| H | 1.58973652  | -2.02807058 | 0.32742421  |
| H | -0.12547729 | -2.45988494 | 0.50096929  |
| H | 1.78590031  | -1.39578092 | 2.60382546  |

2-HP-B-CD:trans-(1R,4S)-SRT\_5\_MD E(Ha)= -7253.9064352402

|    |             |             |             |
|----|-------------|-------------|-------------|
| C  | -0.40836972 | 0.89708724  | 3.68927846  |
| C  | -0.82843860 | 2.06784203  | 4.54581660  |
| C  | -1.11393500 | 3.32382699  | 3.99261789  |
| C  | -1.16584349 | 3.55756001  | 2.49664216  |
| C  | -0.42588886 | 2.45934206  | 1.71239863  |
| C  | -0.77512609 | 1.06381822  | 2.21767387  |
| C  | -0.96541091 | 1.88205764  | 5.93006867  |
| C  | -1.32083265 | 2.92940717  | 6.76709662  |
| C  | -1.55887605 | 4.19023068  | 6.22063642  |
| C  | -1.46905127 | 4.37327548  | 4.84868408  |
| C  | -2.60772166 | 3.70847175  | 2.02912525  |
| C  | -2.92406484 | 4.59874817  | 0.99912104  |
| C  | -4.22485396 | 4.70940471  | 0.52084685  |
| C  | -5.23708058 | 3.92694864  | 1.07099343  |
| C  | -4.94115364 | 3.04444025  | 2.11230325  |
| C  | -3.63605577 | 2.94738780  | 2.58582497  |
| Cl | -6.84575651 | 4.06256705  | 0.44052035  |
| Cl | -6.16753778 | 2.06396100  | 2.83873112  |
| N  | 1.08521933  | 0.61794594  | 3.75857102  |
| C  | 1.83288660  | 0.94494339  | 4.98929985  |
| O  | 3.06737273  | 1.33647100  | 2.04743746  |
| C  | 3.59666228  | 0.38678467  | 1.13696665  |
| C  | 3.97370389  | -0.91981210 | 1.82942786  |
| C  | 4.60562637  | -1.87800276 | 0.80082155  |
| O  | 5.70733242  | -1.27590795 | 0.16944505  |
| C  | 5.39067906  | -0.08032146 | -0.54453020 |
| C  | 4.82982936  | 0.93939655  | 0.44049002  |
| O  | 3.58250448  | -2.20454808 | -0.09373006 |
| C  | 3.86390555  | -3.19772978 | -1.06600012 |
| C  | 3.73926575  | -4.58995536 | -0.45132612 |
| C  | 3.66354130  | -5.66221866 | -1.52576208 |
| C  | 2.52430192  | -5.31688787 | -2.48328403 |
| O  | 2.81264070  | -4.09253951 | -3.08972147 |
| C  | 2.82414633  | -2.98619435 | -2.18251390 |
| O  | 1.34517477  | -5.21370026 | -1.73585430 |
| C  | 0.28452411  | -6.15575076 | -1.83103086 |
| C  | -0.09286182 | -6.40922611 | -0.36395877 |
| C  | -1.48248724 | -6.99022840 | -0.17430698 |
| C  | -2.46938257 | -6.20374199 | -1.04836699 |
| O  | -2.07666467 | -6.23584308 | -2.39067763 |
| C  | -0.86471367 | -5.51439549 | -2.60493250 |
| O  | -2.43376669 | -4.89827363 | -0.55914535 |
| C  | -3.58885649 | -4.14476083 | -0.24192460 |
| C  | -3.03240403 | -3.20983593 | 0.82071607  |
| C  | -4.00176439 | -2.11081215 | 1.20469091  |
| C  | -4.41079353 | -1.40033118 | -0.10096084 |
| O  | -4.99046423 | -2.33334421 | -0.98008174 |
| C  | -4.09930318 | -3.34905165 | -1.43659720 |
| O  | -3.24784066 | -0.81165317 | -0.63384413 |
| C  | -3.39794016 | -0.09377568 | -1.85366230 |
| C  | -3.91680918 | 1.32044009  | -1.61514550 |
| C  | -3.82324985 | 2.12464208  | -2.90682661 |
| C  | -2.40540610 | 2.08190137  | -3.48132549 |
| O  | -2.02419248 | 0.75730133  | -3.67897024 |
| C  | -2.00110965 | -0.03268530 | -2.49178887 |
| O  | -1.53768087 | 2.74710929  | -2.60002602 |

|   |             |             |             |
|---|-------------|-------------|-------------|
| C | -0.70091163 | 3.77304683  | -3.10579512 |
| C | -0.85407364 | 4.92280040  | -2.11436840 |
| C | 0.08000765  | 6.07858265  | -2.41723106 |
| C | 1.51027442  | 5.55330730  | -2.64521288 |
| O | 1.49585596  | 4.51828071  | -3.60406529 |
| C | 0.76338342  | 3.35846434  | -3.20188454 |
| O | -4.26238428 | 3.43691344  | -2.61000152 |
| C | -4.69445330 | 4.19434029  | -3.73089150 |
| C | -5.50582803 | 5.39547540  | -3.26453796 |
| O | -4.80472083 | 6.19432448  | -2.33530274 |
| O | -5.25326191 | 1.24867324  | -1.18506104 |
| O | -3.38567577 | -1.19899432 | 2.08659638  |
| C | -3.83852774 | -1.15410827 | 3.42483380  |
| C | -3.19639262 | -2.21440644 | 4.32820858  |
| O | -1.80951707 | -2.32141618 | 4.02204316  |
| O | -2.61869836 | -3.97554711 | 1.94857887  |
| O | -1.84292264 | -6.83154844 | 1.18435858  |
| C | -2.74768430 | -7.81622157 | 1.67011608  |
| C | -3.48596195 | -7.27417211 | 2.88498203  |
| O | -4.34079520 | -6.20806951 | 2.52272889  |
| O | 0.85521323  | -7.23846448 | 0.27451974  |
| O | 3.44468114  | -6.89472232 | -0.85748048 |
| C | 3.89811391  | -8.04284120 | -1.58043796 |
| C | 3.18185954  | -9.28911862 | -1.08111412 |
| O | 1.81158918  | -9.24368107 | -1.40827693 |
| O | 4.83025360  | -4.83291399 | 0.41204720  |
| O | 2.80835422  | -1.45731555 | 2.41858252  |
| C | 3.03365272  | -2.52188157 | 3.31994759  |
| C | 1.69144803  | -3.10340824 | 3.73083402  |
| O | 0.94810746  | -2.05331241 | 4.33600809  |
| O | 4.43590063  | 2.11564012  | -0.23109857 |
| C | 5.33842533  | 3.19086552  | -0.23658856 |
| C | 4.84539263  | 4.26669966  | 0.73153856  |
| C | 3.48477430  | 4.77714773  | 0.29699208  |
| C | 3.41607237  | 5.09282631  | -1.20517789 |
| C | 4.12830406  | 4.04948877  | -2.07502288 |
| O | 5.40971621  | 3.72203964  | -1.52540342 |
| O | 4.72421397  | 3.72163290  | 2.03975085  |
| C | 5.88753805  | 3.87688296  | 2.82945618  |
| C | 5.67050804  | 3.22136920  | 4.17610503  |
| O | 5.47549916  | 1.83212842  | 3.93472734  |
| O | 3.15527499  | 5.90250384  | 1.06278805  |
| O | 2.00738353  | 5.12789077  | -1.42262769 |
| O | 0.02207241  | 6.96488119  | -1.33258105 |
| C | 0.37481273  | 8.29901047  | -1.62011458 |
| C | 0.96136090  | 8.92559084  | -0.37237320 |
| O | 2.18181888  | 8.23802364  | -0.11928034 |
| O | -2.18033758 | 5.38563195  | -2.11122847 |
| C | 1.07346340  | 2.25865073  | -4.20270203 |
| O | 2.34309552  | 1.67417504  | -3.99441884 |
| C | 4.45071184  | 4.45862102  | -3.50392372 |
| O | 4.67157643  | 3.31019074  | -4.30836598 |
| C | 6.68831936  | 0.37019247  | -1.18625525 |
| O | 7.66578576  | 0.71004297  | -0.22895412 |
| C | 3.04245144  | -1.75158523 | -3.05377272 |
| O | 2.57885386  | -0.61237655 | -2.37586651 |
| C | -0.68069903 | -5.41298159 | -4.10389187 |
| O | -1.63629501 | -4.54634389 | -4.67296308 |



|   |             |              |             |
|---|-------------|--------------|-------------|
| C | -4.83212814 | -4.15668653  | -2.51458019 |
| O | -4.23214652 | -4.04875759  | -3.78783220 |
| C | -1.42021486 | -1.37282562  | -2.88952176 |
| O | -2.25074273 | -1.99588131  | -3.83641779 |
| C | -5.97180786 | 6.21316683   | -4.46198001 |
| C | -4.34098718 | -8.35710112  | 3.51770313  |
| C | 3.77596260  | -10.53029542 | -1.72357280 |
| C | 0.94949940  | -3.72438457  | 2.55799110  |
| C | 6.85622797  | 3.46659585   | 5.09409740  |
| C | -3.35720913 | -1.85867791  | 5.79024767  |
| C | 1.19334831  | 10.41595033  | -0.55376095 |
| H | -2.36674808 | 2.54955289   | -4.47325410 |
| H | -4.49699734 | 1.66406895   | -3.64500753 |
| H | -3.28027317 | 1.79911667   | -0.85416885 |
| H | -4.09015827 | -0.62075482  | -2.52229341 |
| H | -5.18137484 | -0.64709600  | 0.07909624  |
| H | -4.91467382 | -2.53445029  | 1.64675146  |
| H | -2.15256970 | -2.71599151  | 0.38667644  |
| H | -4.37011588 | -4.79002160  | 0.18699735  |
| H | -3.47848576 | -6.62813612  | -0.99894478 |
| H | -1.48925311 | -8.04926794  | -0.46515603 |
| H | -0.09775111 | -5.41808298  | 0.11222545  |
| H | 0.62368364  | -7.09336636  | -2.29408937 |
| H | 2.42198044  | -6.05179736  | -3.29114432 |
| H | 4.61105533  | -5.69480140  | -2.08108825 |
| H | 2.79230134  | -4.60683266  | 0.10799026  |
| H | 4.88171676  | -3.07212752  | -1.46304193 |
| H | 5.02096875  | -2.77348193  | 1.27063959  |
| H | 4.72882493  | -0.70467286  | 2.60302140  |
| H | 2.83088837  | 0.17031153   | 0.38171385  |
| H | 5.59484032  | 1.16392364   | 1.19691615  |
| H | 6.34975001  | 2.85025416   | 0.01622871  |
| H | 5.55757551  | 5.10311623   | 0.73777604  |
| H | 2.77141065  | 3.95373723   | 0.46216264  |
| H | 3.84260524  | 6.09454636   | -1.37362768 |
| H | 2.14763656  | 6.33768841   | -3.07607768 |
| H | -0.25432805 | 6.55942295   | -3.34997900 |
| H | -0.57857656 | 4.53403479   | -1.12076933 |
| H | -1.05296993 | 4.10199814   | -4.09570564 |
| H | 1.10013998  | 3.02315504   | -2.21153759 |
| H | 3.50787351  | 3.14662366   | -2.10257153 |
| H | 4.62806239  | -0.27030846  | -1.31234899 |
| H | 1.84109830  | -2.88475455  | -1.70674586 |
| H | -0.97317719 | -4.49439047  | -2.21803153 |
| H | -3.22391915 | -2.89311576  | -1.90971512 |
| H | -1.31526742 | 0.41889496   | -1.76017262 |
| H | -5.56985541 | 2.15470230   | -1.07910820 |
| H | 3.69906846  | 2.06936790   | 2.17040044  |
| H | -2.75741602 | 4.61278292   | -1.97221960 |
| H | -2.12363601 | -4.73692361  | 1.58644760  |
| H | 1.73948308  | -6.90382615  | 0.03664970  |
| H | 4.76604050  | -5.76366329  | 0.66071889  |
| H | 2.47765815  | 6.40943834   | 0.58367181  |
| H | -5.31333309 | 3.57012855   | -4.39081128 |
| H | -3.82583349 | 4.54268364   | -4.31320543 |
| H | -6.37807190 | 5.01890570   | -2.71631482 |
| H | -6.54034268 | 7.07770356   | -4.11258417 |
| H | -6.61000650 | 5.62750189   | -5.13164442 |

|   |             |              |             |
|---|-------------|--------------|-------------|
| H | -5.11661527 | 6.58249982   | -5.03988435 |
| H | -3.89234207 | 6.32083629   | -2.63169883 |
| H | -2.18971161 | -8.72823058  | 1.92615468  |
| H | -3.49501346 | -8.07039306  | 0.90484824  |
| H | -2.73155958 | -6.93445391  | 3.61342374  |
| H | -4.86988451 | -7.94964597  | 4.38200941  |
| H | -3.73542752 | -9.20674523  | 3.84563769  |
| H | -5.09035525 | -8.71472901  | 2.80426464  |
| H | -3.81787509 | -5.39628676  | 2.46129502  |
| H | 4.98627228  | -8.13472288  | -1.45631075 |
| H | 3.67803604  | -7.92825823  | -2.64980676 |
| H | 3.31959542  | -9.34499794  | 0.01134694  |
| H | 3.24933632  | -11.41527194 | -1.36055618 |
| H | 4.84005307  | -10.63634081 | -1.49336445 |
| H | 3.65322747  | -10.49007198 | -2.81060210 |
| H | 1.35374322  | -8.71116855  | -0.73608336 |
| H | 3.57335012  | -2.15911546  | 4.20943958  |
| H | 3.63056462  | -3.32254693  | 2.86176899  |
| H | 1.89872901  | -3.88208058  | 4.48155582  |
| H | 1.50132257  | -4.58500378  | 2.16705089  |
| H | 0.82821848  | -2.99348726  | 1.75349912  |
| H | -0.03171776 | -4.08967935  | 2.87420091  |
| H | 0.00906031  | -2.30418873  | 4.42077337  |
| H | 3.62471107  | 4.98693363   | -3.97264858 |
| H | 5.33535689  | 5.10966765   | -3.49441002 |
| H | 5.41332557  | 2.83376332   | -3.91733471 |
| H | 7.04028115  | -0.42615820  | -1.85845187 |
| H | 6.50469928  | 1.26461148   | -1.78906445 |
| H | 7.78451757  | -0.07152173  | 0.32348499  |
| H | 6.09764817  | 4.94590882   | 2.97410941  |
| H | 6.76067501  | 3.41144558   | 2.34733781  |
| H | 4.75948657  | 3.65442822   | 4.61935295  |
| H | 6.70157237  | 2.98033894   | 6.06368199  |
| H | 6.99636469  | 4.53412596   | 5.28664787  |
| H | 7.77518437  | 3.06663086   | 4.65405172  |
| H | 5.60905527  | 1.36951074   | 4.76772392  |
| H | 4.10999011  | -1.67541672  | -3.32313836 |
| H | 2.48653245  | -1.93025626  | -3.98535405 |
| H | 2.56436692  | 0.14782967   | -2.98794782 |
| H | -4.93459511 | -1.22287353  | 3.47917732  |
| H | -3.55340125 | -0.16042030  | 3.78919279  |
| H | -3.66764292 | -3.18864512  | 4.13567652  |
| H | -4.41567999 | -1.78210312  | 6.05604008  |
| H | -2.88153793 | -0.89625185  | 6.00914099  |
| H | -2.90061579 | -2.62380905  | 6.42278745  |
| H | -1.79905533 | -2.74035999  | 3.14418507  |
| H | 0.30416218  | -4.98680374  | -4.32065216 |
| H | -0.73519852 | -6.41518123  | -4.55326305 |
| H | -2.52842654 | -4.79475455  | -4.36088156 |
| H | -0.50911414 | 8.86749555   | -1.94542114 |
| H | 1.12981940  | 8.35746567   | -2.41779183 |
| H | 0.25495251  | 8.75315988   | 0.45451366  |
| H | 1.87352665  | 10.60295934  | -1.39072321 |
| H | 1.63635490  | 10.85330471  | 0.34727119  |
| H | 0.25293612  | 10.94219718  | -0.74225398 |
| H | 2.63398200  | 8.67438575   | 0.61040608  |
| H | -4.84891940 | -5.22402346  | -2.27473283 |
| H | -5.87355995 | -3.80731876  | -2.53363777 |

|   |             |             |             |
|---|-------------|-------------|-------------|
| H | -3.95366468 | -3.12786143 | -3.91134027 |
| H | 0.33358144  | 1.46062074  | -4.09059599 |
| H | 0.98524480  | 2.66373928  | -5.22076289 |
| H | 3.06076709  | 2.29244754  | -4.23017124 |
| H | -0.41475390 | -1.18856949 | -3.29397974 |
| H | -1.30060925 | -1.97261622 | -1.97273298 |
| H | -1.81371196 | -2.80488935 | -4.17318407 |
| H | 1.18375103  | -0.41067750 | 3.63242043  |
| H | 1.61389503  | 1.04918063  | 2.97390401  |
| H | 1.65071188  | 1.97985800  | 5.27560798  |
| H | 1.53105737  | 0.27175840  | 5.79137337  |
| H | 2.89085221  | 0.80871843  | 4.75856027  |
| H | -2.15418423 | 5.22501224  | 0.55493721  |
| H | -4.46403812 | 5.39122005  | -0.29249112 |
| H | -3.43916773 | 2.28273614  | 3.42002648  |
| H | -0.79085093 | 0.89418820  | 6.35138651  |
| H | -1.42065820 | 2.76483515  | 7.83560990  |
| H | -1.83557957 | 5.02128726  | 6.86248474  |
| H | -1.69873004 | 5.34422696  | 4.41671171  |
| H | -0.66438380 | 4.51010635  | 2.28417675  |
| H | -0.67232326 | 2.54105598  | 0.64856321  |
| H | 0.65589609  | 2.63172243  | 1.79044187  |
| H | -1.84322358 | 0.85981858  | 2.09264477  |
| H | -0.26267697 | 0.29658043  | 1.62477445  |
| H | -0.87075826 | -0.01683326 | 4.07634979  |

255

2-HP-B-CD:trans-(1R,4S)-SRT\_6\_MD E(Ha)= -7253.9071997225

|    |             |             |             |
|----|-------------|-------------|-------------|
| C  | 1.56676722  | -1.05789377 | 3.26958466  |
| C  | 0.79148730  | -0.60565924 | 2.04833730  |
| C  | -0.31951517 | 0.24278064  | 2.14114381  |
| C  | -0.76938125 | 0.84804758  | 3.45406113  |
| C  | -0.24362468 | 0.04402279  | 4.65360132  |
| C  | 1.24541725  | -0.25302485 | 4.52311152  |
| C  | 1.22496939  | -1.03492148 | 0.78580206  |
| C  | 0.54893975  | -0.66751485 | -0.36899496 |
| C  | -0.57955587 | 0.14802773  | -0.27400306 |
| C  | -0.99677857 | 0.60285300  | 0.96834543  |
| C  | -0.38696281 | 2.31782523  | 3.54621267  |
| C  | -1.30930978 | 3.24791107  | 4.03032943  |
| C  | -0.96530436 | 4.58715167  | 4.16184771  |
| C  | 0.30943924  | 5.02409971  | 3.81546924  |
| C  | 1.23580887  | 4.10497937  | 3.31613565  |
| C  | 0.88162753  | 2.76669548  | 3.17502896  |
| Cl | 0.70353758  | 6.69845817  | 3.98401310  |
| Cl | 2.82656244  | 4.59500065  | 2.84934167  |
| N  | 1.32576858  | -2.53473972 | 3.48835704  |
| C  | 2.20536002  | -3.17489270 | 4.49528609  |
| O  | 1.42348967  | 5.85433777  | -0.44655420 |
| C  | 1.80916354  | 4.78018010  | -1.25272082 |
| C  | 3.27515988  | 4.93962476  | -1.61359996 |
| C  | 3.69363273  | 3.89832844  | -2.65578464 |
| O  | 2.87420004  | 3.94831527  | -3.78208856 |
| C  | 1.48710055  | 3.69965885  | -3.52460404 |
| C  | 0.96247783  | 4.72432516  | -2.52464247 |
| O  | 3.64752233  | 2.62347375  | -2.05314151 |
| C  | 4.86171318  | 1.91052189  | -1.91172240 |
| C  | 4.83643573  | 1.27630870  | -0.52506153 |
| C  | 6.08801878  | 0.42583416  | -0.34152862 |
| C  | 6.16239967  | -0.60270954 | -1.47562276 |
| O  | 6.18205853  | 0.05862482  | -2.70995981 |
| C  | 5.01041292  | 0.82957973  | -2.97884996 |
| O  | 4.09481496  | 4.77261816  | -0.47334783 |
| C  | 5.00354474  | 5.83961981  | -0.22041250 |
| C  | 6.02932075  | 5.40037596  | 0.81393238  |
| O  | 6.77406863  | 4.29255556  | 0.35254699  |
| O  | -0.35253860 | 4.37849744  | -2.11232752 |
| C  | -1.41161615 | 5.24223293  | -2.39353590 |
| C  | -2.24949385 | 5.39969977  | -1.11937948 |
| C  | -2.86480121 | 4.05615325  | -0.76932330 |
| C  | -3.64402607 | 3.50817843  | -1.95451474 |
| C  | -2.76396161 | 3.44527618  | -3.20050564 |
| O  | -2.21921518 | 4.75021443  | -3.43566537 |
| O  | -1.44636990 | 5.85005288  | -0.04651141 |
| C  | -1.81408666 | 7.08100167  | 0.57232350  |
| C  | -3.08579247 | 6.99895514  | 1.42024022  |
| O  | -3.01266931 | 5.91298379  | 2.31906390  |
| O  | -3.69907477 | 4.23641718  | 0.34238079  |
| O  | -4.11186526 | 2.21770865  | -1.58249239 |
| C  | -5.49448401 | 2.00109206  | -1.54968285 |
| C  | -5.85679493 | 1.30833789  | -0.22763165 |
| C  | -5.25506795 | -0.08737471 | -0.20057946 |
| C  | -5.62591146 | -0.85964767 | -1.46387614 |
| C  | -5.28212501 | -0.05271021 | -2.70925983 |

|   |             |             |             |
|---|-------------|-------------|-------------|
| O | -5.92441910 | 1.21773174  | -2.62690515 |
| O | -5.39668641 | 2.12990217  | 0.81782539  |
| C | -6.02225962 | 1.99391157  | 2.08922155  |
| C | -5.91657394 | 3.31008456  | 2.84466971  |
| O | -4.54348459 | 3.54872077  | 3.09200539  |
| O | -5.70679497 | -0.77654445 | 0.95330621  |
| O | -4.86279466 | -2.05505679 | -1.38808207 |
| C | -5.42534929 | -3.26923802 | -1.80775822 |
| C | -5.54903157 | -4.18141770 | -0.58972837 |
| C | -4.17182054 | -4.40287804 | 0.00845682  |
| C | -3.15829702 | -4.86470417 | -1.02698964 |
| C | -3.24513976 | -4.05049077 | -2.32482184 |
| O | -4.60502406 | -3.89483775 | -2.74875409 |
| O | -6.33998319 | -3.60358458 | 0.43584301  |
| C | -7.74472391 | -3.83051120 | 0.29700369  |
| C | -8.51530421 | -2.80092968 | 1.11116684  |
| O | -8.36579565 | -1.51208553 | 0.56285119  |
| O | -4.24303538 | -5.36054899 | 1.04818681  |
| O | -1.85151012 | -4.67791422 | -0.49599860 |
| C | -1.25933588 | -5.80908179 | 0.06893590  |
| C | -0.25372467 | -5.35025172 | 1.14434318  |
| C | 0.93014677  | -4.64740902 | 0.49015723  |
| C | 1.54617262  | -5.53281980 | -0.58881434 |
| C | 0.44761779  | -5.90918070 | -1.57960575 |
| O | -0.59699088 | -6.59292814 | -0.89110841 |
| O | -0.80613268 | -4.45970006 | 2.08661560  |
| C | -1.60627113 | -5.08521897 | 3.06721699  |
| C | -2.14711853 | -4.04161796 | 4.02330106  |
| O | -1.03466557 | -3.48735475 | 4.74099310  |
| O | 1.87870388  | -4.24169715 | 1.45258377  |
| O | 2.54655762  | -4.77643558 | -1.24306143 |
| C | 3.83417750  | -5.32545749 | -1.39731067 |
| C | 4.74192151  | -4.96101392 | -0.21693601 |
| C | 4.83993637  | -3.44872846 | -0.11922602 |
| C | 5.24986443  | -2.85864009 | -1.46832662 |
| C | 4.42153805  | -3.39379875 | -2.63572179 |
| O | 4.37958973  | -4.82588170 | -2.57359681 |
| O | 4.19487172  | -5.57567548 | 0.93933671  |
| C | 5.07971524  | -5.74844193 | 2.04093792  |
| C | 4.51272254  | -6.81567775 | 2.95552831  |
| O | 3.25453389  | -6.33323801 | 3.41489440  |
| O | 5.76317995  | -3.09831534 | 0.88006829  |
| O | 5.06190990  | -1.45437366 | -1.35323007 |
| O | 6.10802017  | -0.27318830 | 0.88520311  |
| C | 6.58065523  | 0.45811616  | 2.01488558  |
| C | 5.58511737  | 0.37690652  | 3.17180482  |
| O | 4.27458833  | 0.70722153  | 2.76548712  |
| O | 4.78219028  | 2.27603220  | 0.48228195  |
| C | 5.18851653  | 1.36248630  | -4.38842017 |
| O | 5.35477905  | 0.31607554  | -5.30841143 |
| C | 5.02445104  | -3.06529667 | -3.98998242 |
| O | 6.35552132  | -3.51180906 | -4.09766068 |
| C | 0.87566599  | -6.79945903 | -2.72978614 |
| O | -0.06999793 | -6.80901792 | -3.76350688 |
| C | -2.53647383 | -4.72278812 | -3.48901617 |
| O | -2.90473527 | -6.07556167 | -3.64085421 |
| C | -5.75675611 | -0.66036405 | -4.01665924 |
| O | -5.42391462 | 0.16372031  | -5.10173704 |

|   |             |             |             |
|---|-------------|-------------|-------------|
| C | -3.52546506 | 3.07019429  | -4.45842944 |
| O | -4.66644348 | 3.87279721  | -4.65444247 |
| C | 0.80861937  | 3.76785241  | -4.87993506 |
| O | 1.22213620  | 2.72877079  | -5.72693670 |
| C | 7.00093852  | 6.52871458  | 1.10684951  |
| C | -6.57916472 | 4.46602610  | 2.11044159  |
| C | -9.99657836 | -3.13330247 | 1.12119284  |
| C | -2.95016128 | -2.95204675 | 3.33441036  |
| C | 4.37696576  | -8.17041867 | 2.28002637  |
| C | -3.26578404 | 8.27517860  | 2.21848916  |
| C | 5.54162067  | -1.00124317 | 3.80860193  |
| H | 4.70936904  | 4.10993127  | -3.01064101 |
| H | 3.41793594  | 5.94070089  | -2.04057052 |
| H | 1.68606040  | 3.81482487  | -0.73346418 |
| H | 0.96529978  | 5.72393875  | -2.98516410 |
| H | -1.04155611 | 6.21571585  | -2.73692601 |
| H | -3.05275476 | 6.11865543  | -1.32973342 |
| H | -2.04371614 | 3.36070815  | -0.53708666 |
| H | -4.49433568 | 4.16747494  | -2.17278253 |
| H | -6.03681286 | 2.94890172  | -1.63133753 |
| H | -6.95376513 | 1.22382344  | -0.18719387 |
| H | -4.15992517 | 0.00988671  | -0.17018183 |
| H | -6.70228673 | -1.08574846 | -1.43784330 |
| H | -6.39122010 | -3.10394294 | -2.29993664 |
| H | -5.97192594 | -5.14636399 | -0.90366229 |
| H | -3.81253840 | -3.43923477 | 0.39847180  |
| H | -3.32898791 | -5.92135491 | -1.26912749 |
| H | -2.02048536 | -6.46738986 | 0.49904970  |
| H | 0.11393065  | -6.25732280 | 1.65260894  |
| H | 0.55274041  | -3.73734050 | 0.00648177  |
| H | 1.97187679  | -6.43877153 | -0.13379619 |
| H | 3.78072798  | -6.41662848 | -1.50706181 |
| H | 5.73904183  | -5.38305577 | -0.41145788 |
| H | 3.83322100  | -3.07257341 | 0.11515115  |
| H | 6.30581023  | -3.09103069 | -1.65993622 |
| H | 7.10216057  | -1.16304103 | -1.41674882 |
| H | 6.97659867  | 1.06905580  | -0.42285361 |
| H | 3.95402051  | 0.62755058  | -0.44336806 |
| H | 5.71797978  | 2.60143003  | -1.96222665 |
| H | 4.12595439  | 0.17872850  | -2.95422220 |
| H | 3.40267146  | -2.99065642 | -2.57686800 |
| H | 0.06515253  | -4.97235673 | -2.00579042 |
| H | -2.80140272 | -3.06260341 | -2.14786791 |
| H | -4.19305652 | 0.08418621  | -2.75636521 |
| H | -1.94733828 | 2.72677570  | -3.04118010 |
| H | 1.36777174  | 2.68946314  | -3.11049572 |
| H | 0.48981170  | 5.72024896  | -0.20843746 |
| H | 2.65869365  | -4.83586745 | 1.44314302  |
| H | 4.23449899  | 3.02206062  | 0.15543614  |
| H | -4.12291060 | 3.39144414  | 0.58927723  |
| H | -5.53409699 | -1.72229706 | 0.80536932  |
| H | -5.01292553 | -5.11510345 | 1.57668336  |
| H | 5.83617569  | -2.12535400 | 0.88670278  |
| H | 4.44505090  | 6.71667381  | 0.13207743  |
| H | 5.53575396  | 6.10247692  | -1.14633134 |
| H | 5.49008083  | 5.14076570  | 1.74021976  |
| H | 6.48225527  | 7.41543775  | 1.48301592  |
| H | 7.55047939  | 6.80004518  | 0.20004030  |

|   |              |             |             |
|---|--------------|-------------|-------------|
| H | 7.72733418   | 6.20517069  | 1.85549540  |
| H | 6.18789700   | 3.52201905  | 0.39480426  |
| H | -5.53435667  | 1.19387725  | 2.65692457  |
| H | -7.08039175  | 1.72717366  | 1.96008260  |
| H | -6.44528210  | 3.15021255  | 3.80029747  |
| H | -6.51085022  | 5.38305506  | 2.70521155  |
| H | -7.64046742  | 4.26233750  | 1.93839687  |
| H | -6.09179422  | 4.64268566  | 1.14828845  |
| H | -4.36763108  | 4.50116403  | 3.06315192  |
| H | -7.97788848  | -4.85264337 | 0.62820250  |
| H | -8.04566239  | -3.72886239 | -0.75407192 |
| H | -8.13008138  | -2.83215824 | 2.14437545  |
| H | -10.39540259 | -3.12280461 | 0.10181046  |
| H | -10.53459888 | -2.37774252 | 1.69756930  |
| H | -10.18865610 | -4.11463176 | 1.56373875  |
| H | -7.49293359  | -1.16712018 | 0.81811951  |
| H | -1.01147420  | -5.81978469 | 3.63243975  |
| H | -2.46440432  | -5.59534591 | 2.61129298  |
| H | -2.78578401  | -4.58265320 | 4.73712243  |
| H | -3.81033623  | -3.38761572 | 2.81978060  |
| H | -2.33322767  | -2.43466550 | 2.59496616  |
| H | -3.32746591  | -2.22289810 | 4.05944666  |
| H | -1.38516364  | -2.95114206 | 5.46003742  |
| H | 4.38198140   | -3.50413337 | -4.76663689 |
| H | 5.03140063   | -1.98267281 | -4.13888462 |
| H | 6.32992122   | -4.47398633 | -4.05494261 |
| H | 1.80066124   | -6.40016712 | -3.15735905 |
| H | 1.08252676   | -7.80965920 | -2.33846102 |
| H | -0.93515253  | -7.05563582 | -3.40960826 |
| H | 5.20388288   | -4.80222105 | 2.57603657  |
| H | 6.06768559   | -6.06317330 | 1.68044251  |
| H | 5.21646216   | -6.90008170 | 3.80001465  |
| H | 3.96321561   | -8.91284542 | 2.97091600  |
| H | 5.35233461   | -8.54215226 | 1.95083113  |
| H | 3.72058187   | -8.09971573 | 1.40912654  |
| H | 2.84978403   | -7.03087382 | 3.93950470  |
| H | -2.74632906  | -4.14059186 | -4.39643799 |
| H | -1.45730765  | -4.71638294 | -3.33413038 |
| H | -3.81449426  | -6.10193104 | -3.95390296 |
| H | -1.91897534  | 7.87412628  | -0.18335808 |
| H | -0.96610030  | 7.32768790  | 1.21837462  |
| H | -3.95042215  | 6.86368595  | 0.74976711  |
| H | -4.18537990  | 8.22370717  | 2.80645964  |
| H | -3.32431029  | 9.15056965  | 1.56524140  |
| H | -2.42676948  | 8.40882942  | 2.90862660  |
| H | -2.97220386  | 5.12544690  | 1.74346485  |
| H | -5.26018403  | -1.62321624 | -4.17150568 |
| H | -6.84334984  | -0.83965321 | -3.95692313 |
| H | -5.85429282  | 1.01397386  | -4.94683528 |
| H | 6.73855074   | 1.50489235  | 1.73667614  |
| H | 7.54712010   | 0.04426599  | 2.33225369  |
| H | 5.94935936   | 1.09350704  | 3.92903900  |
| H | 6.51789773   | -1.27147098 | 4.22189161  |
| H | 5.25376398   | -1.76049999 | 3.07386351  |
| H | 4.81874818   | -1.00091031 | 4.63022157  |
| H | 4.32907758   | 1.40872750  | 2.09345429  |
| H | -2.83342926  | 3.12834249  | -5.31087406 |
| H | -3.87135601  | 2.03631925  | -4.38679558 |

|   |             |             |             |
|---|-------------|-------------|-------------|
| H | -4.35483800 | 4.76864015  | -4.82223727 |
| H | 4.28968177  | 1.91582612  | -4.67508116 |
| H | 6.04119839  | 2.06122051  | -4.40540615 |
| H | 6.15799985  | -0.15208387 | -5.05193178 |
| H | -0.27258399 | 3.67641543  | -4.74795654 |
| H | 1.00534003  | 4.76104442  | -5.31644365 |
| H | 2.16466267  | 2.85239146  | -5.88156853 |
| H | 0.34459652  | -2.73107458 | 3.75721703  |
| H | 1.47408792  | -3.06468584 | 2.59834563  |
| H | 2.25169099  | -4.24446835 | 4.28409266  |
| H | 3.20855739  | -2.75434192 | 4.41153322  |
| H | 1.81598813  | -3.00870139 | 5.49908983  |
| H | -2.32464781 | 2.94110635  | 4.26803775  |
| H | -1.69590041 | 5.31280730  | 4.49666762  |
| H | 1.61316553  | 2.08622854  | 2.75058471  |
| H | 2.11135754  | -1.66062445 | 0.71505107  |
| H | 0.90466247  | -1.00787190 | -1.33715559 |
| H | -1.12384893 | 0.44243904  | -1.16747546 |
| H | -1.85836050 | 1.26279979  | 1.04424991  |
| H | -1.86581577 | 0.81092915  | 3.48013755  |
| H | -0.44035879 | 0.59512542  | 5.57852616  |
| H | -0.80785459 | -0.89611467 | 4.71381360  |
| H | 1.81225055  | 0.68082121  | 4.46215342  |
| H | 1.62300527  | -0.76490036 | 5.41488263  |
| H | 2.63625914  | -0.96450356 | 3.05007679  |



2-HP-B-CD:trans-(1S,4R)-SRT\_1\_Cl E(Ha)= -7253.8924536654

|    |             |             |             |
|----|-------------|-------------|-------------|
| Cl | -7.13295785 | -0.85072937 | 6.77893037  |
| Cl | -4.04714176 | -0.81817303 | 7.60840038  |
| O  | -4.11533683 | -2.57997958 | -3.81401688 |
| O  | -1.21644097 | -4.32451150 | -2.41644820 |
| O  | 0.25942505  | -5.46997785 | -3.76755686 |
| O  | 2.80804276  | -4.85172661 | -1.23586483 |
| O  | 5.04669143  | -4.68189199 | -1.79137576 |
| O  | 5.05574089  | -1.51252190 | 0.01625485  |
| O  | 6.80065939  | 0.01746145  | 0.08500616  |
| O  | 4.56742500  | 2.77259330  | -0.79591661 |
| O  | 4.79778995  | 4.69045160  | -2.03387850 |
| O  | 1.14971333  | 4.87850754  | -2.21860354 |
| O  | -0.21885688 | 5.49237292  | -3.95551311 |
| O  | -2.76937772 | 3.41256943  | -2.38010792 |
| O  | -4.55642819 | 2.59060109  | -3.61027556 |
| O  | -4.31396776 | 3.36791726  | -0.05553357 |
| O  | -4.59165520 | 0.54100456  | -0.00588333 |
| O  | -3.83364494 | -0.78273140 | -2.38126636 |
| O  | -2.54803068 | 5.52297149  | -0.52706404 |
| O  | -0.03912260 | 6.82681666  | -0.56817721 |
| O  | -2.42423993 | 5.34021329  | -5.58499163 |
| O  | 1.54911557  | 5.04392435  | 0.59637959  |
| O  | 4.06407609  | 4.41717385  | 1.53006343  |
| O  | 3.73618891  | 6.70029841  | -3.79021996 |
| O  | 4.22786326  | -0.64696748 | 2.59449436  |
| O  | 3.41704705  | 1.87918464  | 1.68956477  |
| O  | 4.56357156  | -3.37110368 | 2.11863466  |
| O  | 3.51504880  | -5.87329341 | 1.29100056  |
| O  | 7.46168898  | -3.43009501 | -2.07984180 |
| O  | 2.71597536  | -6.26560394 | -4.68938894 |
| O  | -1.59481011 | -6.55566943 | -0.83172301 |
| O  | 1.08794976  | -6.67172318 | 0.10233022  |
| O  | -2.93088071 | -4.18003599 | -0.15350683 |
| O  | -4.95467002 | -2.19830853 | -0.29302618 |
| O  | -3.23014473 | -4.87836790 | -5.23542736 |
| O  | -6.07609601 | 0.61395784  | -4.86994190 |
| O  | 8.00205870  | 2.53303118  | -0.52777943 |
| O  | -4.48994325 | -6.37986996 | -0.78101174 |
| O  | -7.11238074 | -0.48626830 | 0.80678423  |
| O  | -5.34326916 | 5.92969280  | -0.59398619 |
| O  | 2.32169697  | 7.75844522  | 0.80031143  |
| O  | 5.36763416  | 2.95400065  | 3.58468576  |
| O  | 6.26720823  | -2.06287543 | 3.91582798  |
| O  | 3.22686708  | -8.46565292 | 0.21828550  |
| N  | 0.70781743  | 2.39839341  | 1.25258470  |
| C  | 0.14371937  | 1.89478663  | -0.02442279 |
| C  | -5.32747024 | 0.61197026  | 3.52849439  |
| C  | -6.28683562 | 0.15204620  | 4.42390775  |
| C  | -5.91781151 | -0.28738115 | 5.69159833  |
| C  | -4.56485137 | -0.27126173 | 6.05374252  |
| C  | -3.61175420 | 0.19029772  | 5.15207223  |
| C  | -3.97867390 | 0.64316135  | 3.88340092  |
| C  | -1.82468015 | 0.21563726  | 2.62350835  |
| C  | -0.48755439 | 0.62300310  | 2.50084503  |
| C  | 0.52267723  | -0.33679759 | 2.33434484  |
| C  | 0.20830709  | -1.68096597 | 2.18757454  |

|   |             |             |             |
|---|-------------|-------------|-------------|
| C | -1.12832727 | -2.08011999 | 2.21045871  |
| C | -2.12285605 | -1.14209046 | 2.45024960  |
| C | -2.93822754 | 1.20414828  | 2.93466183  |
| C | -2.36386368 | 2.51282984  | 3.48885471  |
| C | -1.28776691 | 3.05262553  | 2.56174875  |
| C | -0.10775834 | 2.08777453  | 2.49416803  |
| C | -2.75739013 | -3.02175252 | -3.74459394 |
| C | -2.57950041 | -3.96366181 | -2.55435637 |
| C | -3.02288458 | -3.30010282 | -1.25437439 |
| C | -4.46980502 | -2.86753844 | -1.44038278 |
| C | -4.58060236 | -1.94465529 | -2.65833006 |
| C | -0.83078466 | -5.59334872 | -2.90376724 |
| C | 1.42411696  | -4.87260535 | -3.19525343 |
| C | 1.84963249  | -5.62780588 | -1.93716385 |
| C | 0.69109482  | -5.85392728 | -0.96949216 |
| C | -0.48290640 | -6.47637219 | -1.69813183 |
| C | 4.09604399  | -5.35231057 | -1.00293146 |
| C | 4.40767021  | -5.13944979 | 0.48413577  |
| C | 4.30490949  | -3.65280189 | 0.76414918  |
| C | 5.28411770  | -2.91029608 | -0.13939839 |
| C | 5.09537439  | -3.26660887 | -1.61403579 |
| C | 5.92507134  | -0.78687812 | 0.83827032  |
| C | 6.16226898  | 0.96833038  | -0.75805362 |
| C | 5.26451816  | 1.88935636  | 0.07176478  |
| C | 4.27490792  | 1.06389676  | 0.88858372  |
| C | 5.08554840  | 0.10752922  | 1.75815444  |
| C | 4.91558543  | 4.14300904  | -0.75731921 |
| C | 3.95914352  | 4.88321047  | 0.19715988  |
| C | 2.55003120  | 4.60232645  | -0.30815163 |
| C | 2.43146923  | 5.19361117  | -1.70480909 |
| C | 3.49990821  | 4.58513911  | -2.62104961 |
| C | 0.39062168  | 5.93148343  | -2.78699691 |
| C | -0.66290596 | 6.38729282  | -1.76245344 |
| C | -1.54390495 | 5.19483195  | -1.45200172 |
| C | -2.14617390 | 4.63697633  | -2.73651257 |
| C | -1.09630865 | 4.37030136  | -3.81441369 |
| C | -4.16953167 | 3.30958813  | -2.47456345 |
| C | -4.06976899 | 1.24782853  | -3.67433631 |
| C | -4.48598630 | 0.47404010  | -2.42414790 |
| C | -4.10380693 | 1.20994246  | -1.14527206 |
| C | -4.67009730 | 2.61668376  | -1.20388751 |
| C | -4.67283772 | 0.65524591  | -4.93764108 |
| C | -1.72914987 | 4.18826499  | -5.18568679 |
| C | 3.56752479  | 5.31268438  | -3.95260895 |
| C | 7.27084953  | 1.74963146  | -1.44249361 |
| C | 6.26667706  | -2.80519112 | -2.46727421 |
| C | 2.48137606  | -4.94151808 | -4.28579714 |
| C | -2.47096861 | -3.70556604 | -5.07009809 |
| C | -5.39709377 | 3.90428788  | 0.71233312  |
| C | 0.37386122  | 8.19523720  | -0.57426104 |
| C | 5.13842075  | 4.98100678  | 2.28888131  |
| C | 4.43103616  | -0.49810346 | 4.00605980  |
| C | 4.05522841  | -7.01579939 | 1.95617088  |
| C | -2.45879357 | -7.65762505 | -1.10333120 |
| C | -6.24436038 | -2.65383791 | 0.12459634  |
| C | -3.76006243 | -7.50120874 | -0.33042786 |
| C | 3.26370221  | -8.27455463 | 1.61802039  |
| C | 5.08904532  | -1.73139942 | 4.62450846  |

|   |             |             |             |
|---|-------------|-------------|-------------|
| C | 5.14306549  | 4.35019558  | 3.67280027  |
| C | 1.12256267  | 8.50766592  | 0.71304891  |
| C | -5.36679960 | 5.43010093  | 0.72968224  |
| C | -6.76807131 | -1.78085749 | 1.25186817  |
| C | -4.63301831 | -8.72907602 | -0.51481444 |
| C | -8.02075576 | -2.39776874 | 1.84762362  |
| C | -6.59119798 | 5.97306353  | 1.44490717  |
| C | 1.49070905  | 9.97851787  | 0.76569686  |
| C | 6.24705414  | 4.94321720  | 4.52633009  |
| C | 5.43861701  | -1.46477031 | 6.07779849  |
| C | 3.90323119  | -9.49004557 | 2.26524512  |
| H | -0.89344818 | 2.21443533  | -0.12465000 |
| H | 0.18983830  | 0.80696708  | -0.03109650 |
| H | 0.72396151  | 2.30851310  | -0.84984789 |
| H | 1.67832897  | 2.02927799  | 1.37720001  |
| H | 0.83595568  | 3.43008809  | 1.17804233  |
| H | -5.64285036 | 0.91811453  | 2.53549339  |
| H | -7.33307471 | 0.12800239  | 4.13822117  |
| H | -2.56870792 | 0.17883310  | 5.45414328  |
| H | 1.56988311  | -0.03530076 | 2.31450230  |
| H | 1.00164030  | -2.41132369 | 2.05555053  |
| H | -1.40186455 | -3.11826854 | 2.04891641  |
| H | -3.15821207 | -1.46471604 | 2.51025675  |
| H | -3.45295009 | 1.43108878  | 1.98994567  |
| H | -1.95003933 | 2.34380602  | 4.49132577  |
| H | -3.16633942 | 3.24791285  | 3.60308174  |
| H | -0.93516862 | 4.03692957  | 2.88948052  |
| H | -1.73061253 | 3.19075073  | 1.56711262  |
| H | 0.58292805  | 2.29595845  | 3.32089119  |
| H | -2.08745659 | -2.15854687 | -3.62335470 |
| H | -3.19642253 | -4.85839187 | -2.71125487 |
| H | -2.39926272 | -2.41301469 | -1.07024188 |
| H | -5.07271897 | -3.76606029 | -1.62914606 |
| H | -5.62610113 | -1.68586652 | -2.86024808 |
| H | -1.63814358 | -6.02777412 | -3.50351515 |
| H | 1.21686948  | -3.82704382 | -2.92861994 |
| H | 2.27714648  | -6.59382020 | -2.23897117 |
| H | 0.37245345  | -4.86813908 | -0.59765070 |
| H | -0.20192891 | -7.47886951 | -2.05140781 |
| H | 4.16524143  | -6.41458949 | -1.25923964 |
| H | 5.43806128  | -5.47141557 | 0.66636062  |
| H | 3.28707422  | -3.32973789 | 0.50459913  |
| H | 6.31490685  | -3.16025912 | 0.14635646  |
| H | 4.16137551  | -2.80813608 | -1.96950765 |
| H | 6.56058815  | -1.44260739 | 1.43871942  |
| H | 5.54637906  | 0.46027617  | -1.51418658 |
| H | 5.90509958  | 2.45526025  | 0.76093259  |
| H | 3.64112829  | 0.47336162  | 0.21601584  |
| H | 5.78475658  | 0.68704756  | 2.37251368  |
| H | 5.96682648  | 4.25769605  | -0.46860854 |
| H | 4.16869312  | 5.96136338  | 0.16922836  |
| H | 2.46331800  | 3.51308127  | -0.40221493 |
| H | 2.57763895  | 6.28004870  | -1.65453665 |
| H | 3.25230925  | 3.52854870  | -2.79230973 |
| H | 1.05549808  | 6.75193715  | -3.08088286 |
| H | -1.26214523 | 7.20249237  | -2.19075645 |
| H | -0.89117213 | 4.41478019  | -1.03404439 |
| H | -2.88140258 | 5.34644506  | -3.14017641 |

|   |             |             |             |
|---|-------------|-------------|-------------|
| H | -0.51887195 | 3.47734000  | -3.53919471 |
| H | -4.63199032 | 4.29828617  | -2.55857702 |
| H | -2.97238417 | 1.24510842  | -3.74471455 |
| H | -5.57623867 | 0.34055538  | -2.44820420 |
| H | -3.00583286 | 1.27111709  | -1.10108463 |
| H | -5.76258371 | 2.55139184  | -1.27691707 |
| H | -4.32017908 | 1.23685145  | -5.80224668 |
| H | -4.32588132 | -0.37563239 | -5.05293843 |
| H | -0.94541630 | 3.90853908  | -5.90485706 |
| H | -2.45870305 | 3.37499104  | -5.13640952 |
| H | 4.37036930  | 4.86681080  | -4.55565040 |
| H | 2.62291037  | 5.16429567  | -4.48453478 |
| H | 7.91479487  | 1.04314059  | -1.98381824 |
| H | 6.82969064  | 2.43570110  | -2.17137455 |
| H | 6.02920089  | -2.99248239 | -3.52546911 |
| H | 6.40699474  | -1.72861479 | -2.33389675 |
| H | 3.42664049  | -4.55244027 | -3.89608275 |
| H | 2.16420294  | -4.30584236 | -5.12663183 |
| H | -1.41763141 | -3.99871694 | -5.10305132 |
| H | -2.65078579 | -2.98410481 | -5.88081094 |
| H | -5.32514080 | 3.50406800  | 1.73121880  |
| H | -6.35025455 | 3.57172829  | 0.28559538  |
| H | -0.51739742 | 8.83031792  | -0.66274032 |
| H | 1.03601579  | 8.39531238  | -1.42814559 |
| H | 4.98904756  | 6.06658766  | 2.35538091  |
| H | 6.10106162  | 4.78215807  | 1.79901866  |
| H | 3.44660005  | -0.32835977 | 4.45832750  |
| H | 5.05457101  | 0.38328414  | 4.19832889  |
| H | 4.04260466  | -6.82599046 | 3.03688086  |
| H | 5.09629229  | -7.16731813 | 1.64533968  |
| H | -1.94922979 | -8.58835894 | -0.81652507 |
| H | -2.69699487 | -7.70433843 | -2.17594389 |
| H | -6.15892259 | -3.69781565 | 0.45472409  |
| H | -6.95338147 | -2.60643395 | -0.71476128 |
| H | -3.50548499 | -7.39231655 | 0.73653480  |
| H | 2.24047914  | -8.15482960 | 2.00645292  |
| H | 4.37557716  | -2.56687870 | 4.57109821  |
| H | 4.16682333  | 4.55095602  | 4.14155730  |
| H | 0.45833827  | 8.26521417  | 1.55719317  |
| H | -4.46129131 | 5.75327087  | 1.26595305  |
| H | -5.98618924 | -1.73128947 | 2.02874167  |
| H | -4.13677140 | -9.63421670 | -0.15347050 |
| H | -4.88279685 | -8.86287361 | -1.57223473 |
| H | -5.56666981 | -8.59934999 | 0.03667437  |
| H | -7.81675146 | -3.38272142 | 2.27603492  |
| H | -8.79789979 | -2.49707161 | 1.08331900  |
| H | -8.41017097 | -1.75120233 | 2.63721059  |
| H | -6.67442506 | 5.57572930  | 2.46139724  |
| H | -7.49764439 | 5.70799370  | 0.89193014  |
| H | -6.53809628 | 7.06240197  | 1.50080773  |
| H | 0.60332963  | 10.61606432 | 0.72387458  |
| H | 2.14881787  | 10.23691349 | -0.06975440 |
| H | 2.02625357  | 10.18851247 | 1.69374047  |
| H | 6.12487915  | 6.02356307  | 4.64311218  |
| H | 7.22427900  | 4.74619412  | 4.07519558  |
| H | 6.23340436  | 4.48226417  | 5.51598104  |
| H | 4.55941512  | -1.16038426 | 6.65480979  |
| H | 6.19196475  | -0.67351770 | 6.14400953  |

|   |             |              |             |
|---|-------------|--------------|-------------|
| H | 5.85515406  | -2.36628288  | 6.53201355  |
| H | 3.98462016  | -9.37350523  | 3.35045496  |
| H | 4.90500732  | -9.65237047  | 1.85480765  |
| H | 3.30621128  | -10.37998353 | 2.05487983  |
| H | -4.42087387 | -0.41607138  | -0.12350783 |
| H | -3.04180637 | 4.69558648   | -0.34940855 |
| H | -1.77329958 | 6.04809315   | -5.64973140 |
| H | 0.91200107  | 5.62771369   | 0.11314001  |
| H | 4.60535383  | 6.83849374   | -3.39748605 |
| H | 3.70778898  | 2.82022248   | 1.59746949  |
| H | 4.28996775  | -2.44367259  | 2.25242415  |
| H | 7.31134104  | -4.37840059  | -2.17270363 |
| H | 1.86919478  | -6.61093406  | -4.99546022 |
| H | 1.80729582  | -6.20421619  | 0.57156020  |
| H | -2.22010190 | -4.82319184  | -0.34173724 |
| H | -4.15862613 | -4.62040621  | -5.20434760 |
| H | -6.37793034 | 1.52683057   | -4.79931480 |
| H | 8.43560187  | 1.92207476   | 0.07944301  |
| H | -4.05847614 | -5.58449634  | -0.42484192 |
| H | -6.32166511 | -0.05251712  | 0.45065180  |
| H | -4.42222437 | 6.14313105   | -0.79565144 |
| H | 2.10172104  | 6.86495238   | 1.09731591  |
| H | 4.54814252  | 2.52166951   | 3.31352851  |
| H | 6.03404420  | -2.78051373  | 3.30977587  |
| H | 2.40494221  | -8.05156441  | -0.08634647 |

2-HP-B-CD:trans-(1S,4R)-SRT\_2\_C1 E(Ha)= -7253.8887175250

|    |             |             |             |
|----|-------------|-------------|-------------|
| Cl | -0.90260499 | 13.26917338 | -3.57750892 |
| Cl | 1.01730021  | 10.72749177 | -3.33580054 |
| O  | -5.61781008 | -2.52421175 | 2.31888767  |
| O  | -4.44665730 | 0.48182951  | 0.59235745  |
| O  | -3.94909353 | 2.31357076  | 1.91735424  |
| O  | -0.80040367 | 2.80347207  | 0.12986827  |
| O  | 0.68028621  | 4.07908776  | 1.37170238  |
| O  | 3.45291172  | 1.83879952  | 0.59086118  |
| O  | 4.99546240  | 1.29573647  | 2.21408200  |
| O  | 5.07013246  | -2.12263653 | 0.89984377  |
| O  | 5.47311711  | -3.87346436 | 2.36208867  |
| O  | 2.92998392  | -5.96372096 | 0.75767046  |
| O  | 1.80717010  | -7.51672854 | 2.06069654  |
| O  | -1.36677036 | -6.71566139 | 0.42780189  |
| O  | -3.32886680 | -7.11912175 | 1.59252690  |
| O  | -2.64911653 | -7.25197107 | -1.98100009 |
| O  | -4.50377207 | -5.10784743 | -1.82534355 |
| O  | -4.59692714 | -3.80143527 | 0.69192180  |
| O  | 0.10196011  | -7.84849472 | -1.69092245 |
| O  | 2.96581373  | -7.65055866 | -1.36190886 |
| O  | -0.26803558 | -8.74398636 | 3.33485540  |
| O  | 4.84116353  | -5.66698741 | -1.31719225 |
| O  | 6.50407375  | -3.33614172 | -1.06107021 |
| O  | 5.00003057  | -6.18659215 | 3.77474075  |
| O  | 5.46374689  | 2.11585734  | -1.29085656 |
| O  | 6.19460118  | -0.64702541 | -1.26052593 |
| O  | 2.86054862  | 2.98755296  | -1.96704373 |
| O  | 0.19479026  | 3.89827302  | -2.23358004 |
| O  | 2.50998733  | 4.65804449  | 3.21463813  |
| O  | -2.10496741 | 4.02399655  | 3.19756549  |
| O  | -5.25108114 | 2.15280044  | -1.49159722 |
| O  | -2.67598474 | 3.37768221  | -1.84662511 |
| O  | -6.34507882 | -0.52683011 | -1.21127903 |
| O  | -6.67334725 | -3.36652909 | -1.05803656 |
| O  | -5.99655712 | -0.27953163 | 3.85938433  |
| O  | -5.64521744 | -6.28494803 | 3.00492084  |
| O  | 6.48924737  | -0.40306016 | 3.81517845  |
| O  | -7.85067849 | 1.71838277  | -0.53263926 |
| O  | -7.04351039 | -6.19463007 | -1.60379942 |
| O  | -1.79146874 | -9.92059784 | -1.91969997 |
| O  | 5.57092251  | -8.30826682 | -2.25231608 |
| O  | 8.73622211  | -1.85501738 | -1.97135085 |
| O  | 4.81994624  | 4.88608240  | -1.53708283 |
| O  | -1.60930390 | 5.98762836  | -1.81502116 |
| N  | -0.03807613 | 6.02176809  | 3.36417711  |
| C  | -0.25268721 | 6.47156560  | 4.75966509  |
| C  | -1.81563204 | 11.77288515 | 0.01043521  |
| C  | -1.78424073 | 12.56747399 | -1.12956365 |
| C  | -0.91982456 | 12.26373705 | -2.17759980 |
| C  | -0.07934470 | 11.14860801 | -2.06885498 |
| C  | -0.11764985 | 10.36001087 | -0.92430875 |
| C  | -0.98492416 | 10.65893521 | 0.12734818  |
| C  | 0.30701427  | 9.51095236  | 1.98229378  |
| C  | 0.70835542  | 8.25073783  | 2.45739863  |
| C  | 1.97726983  | 8.10587167  | 3.03451611  |
| C  | 2.83131605  | 9.19074978  | 3.17865977  |

|   |             |             |             |
|---|-------------|-------------|-------------|
| C | 2.42713931  | 10.44489147 | 2.72989775  |
| C | 1.18235270  | 10.59234623 | 2.13560562  |
| C | -1.05409310 | 9.75628177  | 1.34297545  |
| C | -1.78696481 | 8.45351653  | 0.99665739  |
| C | -1.66579178 | 7.44578384  | 2.13056414  |
| C | -0.20367499 | 7.05527639  | 2.27802384  |
| C | -4.77221324 | -1.39794080 | 2.09683877  |
| C | -5.36687328 | -0.53264987 | 0.98836829  |
| C | -5.67315179 | -1.33414048 | -0.27208983 |
| C | -6.52012188 | -2.54386001 | 0.07424678  |
| C | -5.82321166 | -3.33476881 | 1.19042820  |
| C | -4.74464418 | 1.81695154  | 0.85032385  |
| C | -2.55269528 | 2.15185670  | 1.69727300  |
| C | -2.17503417 | 2.94603952  | 0.45351560  |
| C | -2.98518754 | 2.52655545  | -0.76586091 |
| C | -4.46345099 | 2.62211567  | -0.42841283 |
| C | -0.03518929 | 3.96662612  | 0.15803849  |
| C | 0.91987492  | 3.98835416  | -1.03231506 |
| C | 1.94673945  | 2.87568286  | -0.90766907 |
| C | 2.65150262  | 2.99124310  | 0.44858878  |
| C | 1.63034643  | 3.04017707  | 1.58907076  |
| C | 4.79793886  | 1.95579070  | 0.99975841  |
| C | 4.72935269  | -0.11670859 | 2.17875094  |
| C | 5.52291690  | -0.78990617 | 1.05761221  |
| C | 5.35276788  | -0.09065776 | -0.29158198 |
| C | 5.68068947  | 1.37816507  | -0.10886830 |
| C | 5.93598285  | -3.17932521 | 1.23863225  |
| C | 6.05498458  | -4.10843450 | 0.02710808  |
| C | 4.71509996  | -4.76756587 | -0.24628866 |
| C | 4.23563212  | -5.47071345 | 1.01824267  |
| C | 4.20485857  | -4.52034972 | 2.21370624  |
| C | 2.66756386  | -7.32620509 | 0.97184971  |
| C | 2.06190667  | -7.90385559 | -0.31268976 |
| C | 0.70534245  | -7.27084886 | -0.55718496 |
| C | -0.17575746 | -7.44762855 | 0.67238391  |
| C | 0.50790061  | -6.93259904 | 1.93652971  |
| C | -2.59290676 | -7.39473006 | 0.42717878  |
| C | -3.61905266 | -5.73522471 | 1.78516511  |
| C | -4.41570421 | -5.20926134 | 0.59347965  |
| C | -3.69828286 | -5.47228506 | -0.72442363 |
| C | -3.37874881 | -6.95567037 | -0.81195100 |
| C | -4.39245745 | -5.65028736 | 3.08954537  |
| C | -0.22745106 | -7.34725798 | 3.20141095  |
| C | 3.98041761  | -5.25269924 | 3.52672793  |
| C | 5.12849294  | -0.63184456 | 3.55139931  |
| C | 2.22376930  | 3.28478811  | 2.97070649  |
| C | -1.86670921 | 2.64224965  | 2.95555495  |
| C | -4.71904407 | -0.67942374 | 3.43511231  |
| C | -3.21683810 | -8.21972566 | -2.86268299 |
| C | 3.18854076  | -8.71423573 | -2.28335137 |
| C | 7.49782302  | -3.92944998 | -1.89483435 |
| C | 6.45277590  | 3.11399247  | -1.54023780 |
| C | 0.23346728  | 5.04630338  | -3.08032147 |
| C | -6.33297366 | 2.98925973  | -1.90151605 |
| C | -7.94682527 | -4.00381275 | -1.13872129 |
| C | -7.65897635 | 2.24031886  | -1.83203959 |
| C | -1.11670742 | 5.75940483  | -3.12976503 |
| C | 5.84638235  | 4.28110337  | -2.30282031 |

|   |             |              |             |
|---|-------------|--------------|-------------|
| C | 8.10941983  | -2.83870443  | -2.76316493 |
| C | 4.44074684  | -8.39480205  | -3.08863395 |
| C | -2.22449295 | -9.34541741  | -3.13535250 |
| C | -7.87973689 | -5.17713501  | -2.10478183 |
| C | -8.81108281 | 3.16893262   | -2.17197709 |
| C | -9.26324165 | -5.76775767  | -2.31234461 |
| C | -2.86896130 | -10.42458495 | -3.98668512 |
| C | 4.70368023  | -9.48367536  | -4.11251118 |
| C | 9.15751127  | -3.42770097  | -3.68929027 |
| C | 6.90554799  | 5.32548036   | -2.60427483 |
| C | -0.99568866 | 7.08379127   | -3.85877718 |
| H | -1.29136611 | 6.77331545   | 4.88895228  |
| H | 0.40723506  | 7.30879586   | 4.98146716  |
| H | -0.03499400 | 5.63676980   | 5.42646963  |
| H | 0.89936060  | 5.58319526   | 3.26341908  |
| H | -0.71902439 | 5.26374635   | 3.16716298  |
| H | -2.49772680 | 12.02905076  | 0.81688127  |
| H | -2.42954515 | 13.43492030  | -1.21743548 |
| H | 0.55415364  | 9.50946814   | -0.85828026 |
| H | 2.31174238  | 7.13481327   | 3.39196568  |
| H | 3.80600650  | 9.05739304   | 3.63763937  |
| H | 3.08291589  | 11.30341457  | 2.83617092  |
| H | 0.87459177  | 11.56738157  | 1.76848773  |
| H | -1.66036304 | 10.28032381  | 2.09679573  |
| H | -1.38789063 | 8.01733109   | 0.07190115  |
| H | -2.83909766 | 8.67685023   | 0.79639872  |
| H | -2.26701661 | 6.55295532   | 1.92320609  |
| H | -2.04006639 | 7.89061996   | 3.06154340  |
| H | 0.10046880  | 6.51095072   | 1.37653523  |
| H | -3.76717516 | -1.73053893  | 1.80164094  |
| H | -6.28944968 | -0.07556886  | 1.37034494  |
| H | -4.72120563 | -1.69264990  | -0.69039804 |
| H | -7.49944199 | -2.19930105  | 0.43673491  |
| H | -6.44203284 | -4.17007074  | 1.53559736  |
| H | -5.78744448 | 1.94785929   | 1.15540041  |
| H | -2.30635227 | 1.09068870   | 1.55241366  |
| H | -2.39703841 | 4.00296908   | 0.65895301  |
| H | -2.74900934 | 1.48364502   | -1.01831930 |
| H | -4.70061729 | 3.67426246   | -0.21659155 |
| H | -0.67369578 | 4.85375137   | 0.09942948  |
| H | 1.45598424  | 4.94728121   | -0.98954721 |
| H | 1.42910638  | 1.90511519   | -0.94141816 |
| H | 3.27821342  | 3.89755351   | 0.43253167  |
| H | 1.12827294  | 2.06133646   | 1.60154614  |
| H | 5.05212527  | 3.00971530   | 1.17221681  |
| H | 3.65786032  | -0.28723750  | 2.00665002  |
| H | 6.58701742  | -0.77616345  | 1.33067760  |
| H | 4.29826081  | -0.18307949  | -0.59487178 |
| H | 6.73162639  | 1.45817243   | 0.20026586  |
| H | 6.92202396  | -2.78919661  | 1.51306983  |
| H | 6.79543579  | -4.88475738  | 0.26659326  |
| H | 3.99153648  | -3.97580115  | -0.49582918 |
| H | 4.91646402  | -6.29996653  | 1.25333318  |
| H | 3.41572537  | -3.77136272  | 2.05565240  |
| H | 3.59052566  | -7.85840565  | 1.22574731  |
| H | 1.93924091  | -8.98734819  | -0.17361097 |
| H | 0.86058032  | -6.19361751  | -0.71833000 |
| H | -0.40307625 | -8.51280601  | 0.81749691  |



|   |             |              |             |
|---|-------------|--------------|-------------|
| H | 0.58912518  | -5.83753370  | 1.88163222  |
| H | -2.44318478 | -8.47920319  | 0.40309347  |
| H | -2.68490458 | -5.16141284  | 1.87273302  |
| H | -5.39194974 | -5.71074489  | 0.56375238  |
| H | -2.75639458 | -4.90452692  | -0.74123225 |
| H | -4.32637692 | -7.51044465  | -0.80982327 |
| H | -3.77079669 | -6.07962012  | 3.88948765  |
| H | -4.58171520 | -4.60041353  | 3.33145565  |
| H | 0.25675007  | -6.86650648  | 4.06569785  |
| H | -1.26299989 | -7.00041063  | 3.14703966  |
| H | 3.89919963  | -4.51036864  | 4.33590514  |
| H | 3.04088078  | -5.80967439  | 3.47308692  |
| H | 4.47970414  | -0.16360301  | 4.30816461  |
| H | 4.97189071  | -1.71357476  | 3.58599912  |
| H | 1.49618682  | 3.00557868   | 3.73878464  |
| H | 3.11279585  | 2.65722461   | 3.10890312  |
| H | -0.78742806 | 2.52616156   | 2.85002310  |
| H | -2.20706873 | 2.04327283   | 3.80940180  |
| H | -4.11880406 | 0.22939880   | 3.33660170  |
| H | -4.23176908 | -1.34178083  | 4.16688516  |
| H | -3.50643048 | -7.71768795  | -3.79427008 |
| H | -4.11886213 | -8.64963029  | -2.41028347 |
| H | 2.31193480  | -8.83203694  | -2.93222911 |
| H | 3.35540334  | -9.64968530  | -1.73038675 |
| H | 7.04563787  | -4.72243614  | -2.50234467 |
| H | 8.28855845  | -4.36378005  | -1.26669925 |
| H | 7.28476842  | 2.66453804   | -2.09836063 |
| H | 6.84114740  | 3.50298785   | -0.58823631 |
| H | 0.52301619  | 4.71226348   | -4.08280140 |
| H | 1.00337595  | 5.74269911   | -2.72451450 |
| H | -6.13363612 | 3.33766348   | -2.92248356 |
| H | -6.39371125 | 3.86602737   | -1.24388040 |
| H | -8.69467975 | -3.26776539  | -1.46696864 |
| H | -8.24363991 | -4.39194463  | -0.15369305 |
| H | -7.62934018 | 1.41864482   | -2.56367702 |
| H | -1.82680796 | 5.11462354   | -3.66749922 |
| H | 5.43536278  | 3.89811003   | -3.24989281 |
| H | 7.30162065  | -2.39259616  | -3.36736553 |
| H | 4.27094055  | -7.43863866  | -3.61236047 |
| H | -1.36390202 | -8.92349354  | -3.67810480 |
| H | -7.49851154 | -4.79884337  | -3.06756491 |
| H | -8.68499880 | 3.62383041   | -3.15947498 |
| H | -8.88567268 | 3.96678384   | -1.42592796 |
| H | -9.75097922 | 2.61296866   | -2.16360573 |
| H | -9.95940553 | -5.03206991  | -2.72556742 |
| H | -9.66426454 | -6.13788351  | -1.36322326 |
| H | -9.19888775 | -6.61339853  | -3.00037191 |
| H | -3.25435002 | -10.01879492 | -4.92728428 |
| H | -3.69689724 | -10.88879749 | -3.44143413 |
| H | -2.13883967 | -11.20375765 | -4.21637455 |
| H | 3.86380476  | -9.59566991  | -4.80435470 |
| H | 4.87634255  | -10.44069106 | -3.61009205 |
| H | 5.60039283  | -9.23953586  | -4.68616938 |
| H | 8.73198790  | -4.19837287  | -4.33842215 |
| H | 9.97123679  | -3.86968086  | -3.10568883 |
| H | 9.58195062  | -2.63821858  | -4.31327546 |
| H | 7.72374871  | 4.90821629   | -3.19828725 |
| H | 7.31937445  | 5.72749341   | -1.67368493 |

|   |             |             |             |
|---|-------------|-------------|-------------|
| H | 6.45944530  | 6.15351730  | -3.15924965 |
| H | -0.58864003 | 6.94833899  | -4.86555897 |
| H | -0.33602502 | 7.76539426  | -3.31185531 |
| H | -1.97584366 | 7.55780222  | -3.94487660 |
| H | -4.96416961 | -4.28200127 | -1.59289006 |
| H | -0.75841992 | -7.40165979 | -1.82041972 |
| H | 0.64919153  | -9.04228207 | 3.32861976  |
| H | 4.00060725  | -6.16289585 | -1.37930456 |
| H | 5.82735334  | -5.69108714 | 3.78049171  |
| H | 6.05564793  | -1.61625731 | -1.24471278 |
| H | 3.61765913  | 2.39557178  | -1.78969840 |
| H | 3.20067657  | 4.94984682  | 2.60918300  |
| H | -3.06311814 | 4.13992163  | 3.23063949  |
| H | -1.73578711 | 3.23658733  | -2.06073255 |
| H | -5.75213907 | 0.21547747  | -1.42811844 |
| H | -6.53170954 | -1.08133265 | 3.89890029  |
| H | -5.47556199 | -7.20534736 | 2.77186791  |
| H | 6.62840095  | 0.54804523  | 3.74460034  |
| H | -7.53936613 | 0.79979023  | -0.57111341 |
| H | -6.12272192 | -5.93746018 | -1.78541162 |
| H | -0.98871302 | -9.44114153 | -1.66549807 |
| H | 5.53236190  | -7.46406768 | -1.78123367 |
| H | 8.04816397  | -1.28466825 | -1.60235732 |
| H | 4.00716886  | 4.39752911  | -1.74857098 |
| H | -2.21640759 | 5.25072171  | -1.64044601 |

2-HP-B-CD:trans-(1S,4R)-SRT\_3\_Cl E(Ha)= -7253.8882245840

|    |             |             |             |
|----|-------------|-------------|-------------|
| Cl | 0.39890023  | 7.13851250  | 5.32174277  |
| Cl | 0.46657021  | 4.32402384  | 6.83276912  |
| O  | -3.69279847 | 3.96624011  | -3.63882595 |
| O  | -4.93505443 | 1.11963564  | -1.70939241 |
| O  | -6.16302344 | -0.54523685 | -2.73632470 |
| O  | -4.21478900 | -2.90171637 | -0.74236576 |
| O  | -4.10904390 | -5.15015815 | -1.28478946 |
| O  | -0.44953680 | -5.17470950 | -1.11868875 |
| O  | 0.98867584  | -6.35352628 | -2.46929796 |
| O  | 3.64004155  | -4.27279273 | -1.13009879 |
| O  | 5.82497538  | -3.89424033 | -1.80040199 |
| O  | 5.13243261  | -0.32473277 | -1.55814328 |
| O  | 5.78942026  | 1.31885148  | -3.03769662 |
| O  | 2.60442672  | 3.08741504  | -2.60227348 |
| O  | 1.48098593  | 4.20357829  | -4.27917109 |
| O  | 2.59841608  | 5.37211514  | -1.01363433 |
| O  | -0.18422580 | 5.48175396  | -0.70432704 |
| O  | -1.68989858 | 3.90117555  | -2.46865291 |
| O  | 3.62876585  | 3.10259542  | 0.06947015  |
| O  | 5.74576785  | 1.36710139  | 0.59956203  |
| O  | 5.31001461  | 3.51311693  | -4.79450680 |
| O  | 5.19129787  | -1.17039743 | 1.20735430  |
| O  | 4.30702762  | -3.85479670 | 1.49745052  |
| O  | 7.87418420  | -2.32250064 | -2.92667776 |
| O  | 0.29008559  | -6.71949339 | 1.09121544  |
| O  | 3.04672298  | -6.15336855 | 1.05491986  |
| O  | -1.05414035 | -4.35013243 | 1.48207239  |
| O  | -3.75747333 | -3.51512208 | 1.96721813  |
| O  | -2.78937672 | -7.44765407 | -2.28777208 |
| O  | -6.75053712 | -3.11190072 | -3.48456180 |
| O  | -6.59077601 | 1.03442725  | 0.51030582  |
| O  | -5.72739703 | -1.60266546 | 1.24808763  |
| O  | -4.78635656 | 3.15594654  | 0.26334323  |
| O  | -2.83154283 | 5.16980479  | -0.33031169 |
| O  | -6.08376383 | 2.90759954  | -4.65114904 |
| O  | -0.63775378 | 5.07909362  | -5.79478675 |
| O  | 3.32890415  | -6.77835046 | -3.87062738 |
| O  | -7.50775576 | 3.78318640  | 0.24809801  |
| O  | -1.50677769 | 7.53032232  | 0.81236568  |
| O  | 5.34901914  | 5.25567179  | -0.06054998 |
| O  | 7.69346613  | -0.20687585 | 2.12715058  |
| O  | 3.32512659  | -5.44924791 | 3.80730762  |
| O  | -2.09358795 | -6.83070533 | 2.64874836  |
| O  | -6.48613445 | -4.10225483 | 2.30747112  |
| N  | 0.84824639  | -2.20727828 | 1.30794932  |
| C  | 0.60680998  | -1.89352822 | -0.12621074 |
| C  | 0.86289301  | 4.51154962  | 2.34658393  |
| C  | 0.70973396  | 5.69123337  | 3.06769183  |
| C  | 0.59044206  | 5.65917102  | 4.45425752  |
| C  | 0.61641553  | 4.42484521  | 5.11452936  |
| C  | 0.75077902  | 3.24899035  | 4.38286109  |
| C  | 0.88167848  | 3.27468039  | 2.99361387  |
| C  | -0.30899612 | 1.19624737  | 2.20213289  |
| C  | -0.34640799 | -0.20991770 | 2.24783849  |
| C  | -1.58050301 | -0.86957370 | 2.33937843  |
| C  | -2.77270122 | -0.15839352 | 2.32539415  |

|   |             |             |             |
|---|-------------|-------------|-------------|
| C | -2.74246034 | 1.22961502  | 2.21497598  |
| C | -1.52393097 | 1.89001778  | 2.16434562  |
| C | 0.99703728  | 1.98472921  | 2.20320894  |
| C | 2.16986534  | 1.12002640  | 2.66914442  |
| C | 2.17285672  | -0.20213591 | 1.91672040  |
| C | 0.93374843  | -1.01557458 | 2.25749247  |
| C | -4.03903540 | 2.60287916  | -3.38930527 |
| C | -4.79078282 | 2.48676052  | -2.06498187 |
| C | -4.02439909 | 3.14656182  | -0.92556386 |
| C | -3.65872440 | 4.57109044  | -1.30497995 |
| C | -2.91286870 | 4.57038112  | -2.64515052 |
| C | -6.19060316 | 0.49881105  | -1.80125993 |
| C | -5.19111306 | -1.56012879 | -2.48317075 |
| C | -5.35951072 | -2.12171070 | -1.07212271 |
| C | -5.46199245 | -1.03067561 | -0.01326338 |
| C | -6.53782022 | -0.03860535 | -0.40484689 |
| C | -4.39489284 | -4.20987072 | -0.27897189 |
| C | -3.45538115 | -4.41561053 | 0.91969589  |
| C | -2.01975021 | -4.23019533 | 0.43245236  |
| C | -1.78953023 | -5.26582435 | -0.66020814 |
| C | -2.78619710 | -5.07074196 | -1.80396384 |
| C | 0.20090041  | -6.42039200 | -1.32512446 |
| C | 1.98864784  | -5.33559383 | -2.46659883 |
| C | 2.91397486  | -5.49093123 | -1.26184674 |
| C | 2.16620475  | -5.73412906 | 0.04612299  |
| C | 1.06040164  | -6.75545499 | -0.10017815 |
| C | 4.99596475  | -4.32544741 | -0.76276493 |
| C | 5.19742712  | -3.43133448 | 0.46790405  |
| C | 4.91913191  | -1.98798587 | 0.09578234  |
| C | 5.69741718  | -1.55813558 | -1.14252282 |
| C | 5.55466417  | -2.57384644 | -2.27536253 |
| C | 5.94748015  | 0.81013958  | -1.74566457 |
| C | 5.53374070  | 1.85943396  | -0.70804949 |
| C | 4.06712160  | 2.20661920  | -0.92538978 |
| C | 3.96018894  | 2.76923347  | -2.33822489 |
| C | 4.46289827  | 1.74655728  | -3.36204459 |
| C | 2.34349396  | 4.34702681  | -3.19279240 |
| C | 0.17584657  | 3.69117461  | -3.99167495 |
| C | -0.49368390 | 4.53108355  | -2.90487428 |
| C | 0.40834434  | 4.67639645  | -1.68484788 |
| C | 1.73309669  | 5.26680763  | -2.12513030 |
| C | -0.57388430 | 3.76188956  | -5.31245864 |
| C | 4.54000255  | 2.33617748  | -4.75964067 |
| C | 6.54932552  | -2.31371957 | -3.39401424 |
| C | 2.74237219  | -5.50771852 | -3.77681952 |
| C | -2.67985843 | -6.16244964 | -2.85439595 |
| C | -5.44006179 | -2.61504395 | -3.55021041 |
| C | -4.89022210 | 2.17060041  | -4.57150237 |
| C | 3.51492542  | 6.46693701  | -1.08129422 |
| C | 6.91276609  | 1.90221720  | 1.23905422  |
| C | 4.82029344  | -3.77038238 | 2.83853904  |
| C | -0.30995107 | -7.95952660 | 1.46704833  |
| C | -4.23746814 | -4.10079265 | 3.18589036  |
| C | -7.91553428 | 1.47619013  | 0.81581979  |
| C | -3.46783803 | 6.10819269  | 0.54129151  |
| C | -7.89159538 | 2.92003874  | 1.29434034  |
| C | -5.70563282 | -3.76393767 | 3.43870893  |
| C | -1.04319422 | -7.77519855 | 2.78614896  |

|   |             |             |             |
|---|-------------|-------------|-------------|
| C | 3.70282457  | -4.09853882 | 3.82103594  |
| C | 7.24871071  | 1.08469551  | 2.47627821  |
| C | 4.50817650  | 6.38364998  | 0.06879887  |
| C | -2.42766508 | 6.69849503  | 1.48240147  |
| C | -9.27209866 | 3.33970448  | 1.76783246  |
| C | -3.10116625 | 7.54803384  | 2.54521095  |
| C | 5.38902746  | 7.61936206  | 0.09321524  |
| C | 8.36098505  | 1.75698173  | 3.26086820  |
| C | 4.14897019  | -3.78008129 | 5.23800291  |
| C | -1.65591899 | -9.08386715 | 3.24567803  |
| C | -6.21703261 | -4.52757255 | 4.64753477  |
| H | 1.48231560  | -1.40789268 | -0.55345164 |
| H | -0.25846755 | -1.23336720 | -0.18880719 |
| H | 0.40781034  | -2.83158826 | -0.64730195 |
| H | 0.10914804  | -2.88738117 | 1.59316823  |
| H | 1.73766878  | -2.71505371 | 1.38458177  |
| H | 0.93895335  | 4.57779391  | 1.26491345  |
| H | 0.64684079  | 6.64384263  | 2.55037624  |
| H | 0.73424820  | 2.30744429  | 4.92313135  |
| H | -1.63117364 | -1.95336260 | 2.43233502  |
| H | -3.72216789 | -0.67728465 | 2.39896320  |
| H | -3.66299825 | 1.80292118  | 2.17433973  |
| H | -1.50705634 | 2.97452789  | 2.11052085  |
| H | 1.21768406  | 2.27227409  | 1.16486503  |
| H | 2.11029243  | 0.93818876  | 3.74948176  |
| H | 3.10556647  | 1.65229574  | 2.47670853  |
| H | 3.08097922  | -0.77699767 | 2.12781949  |
| H | 2.18436525  | 0.02884961  | 0.84397707  |
| H | 1.06669493  | -1.48776401 | 3.24038301  |
| H | -3.12957512 | 1.98717596  | -3.33618576 |
| H | -5.77543132 | 2.96195974  | -2.17015038 |
| H | -3.09095792 | 2.58681218  | -0.76490753 |
| H | -4.57641604 | 5.16156959  | -1.43384561 |
| H | -2.74230586 | 5.59845728  | -2.98260296 |
| H | -6.94941306 | 1.20490188  | -2.15636580 |
| H | -4.17847924 | -1.14496061 | -2.58243007 |
| H | -6.26424233 | -2.74433000 | -1.05574166 |
| H | -4.50246483 | -0.49576958 | 0.01735636  |
| H | -7.50848790 | -0.55054622 | -0.44777326 |
| H | -5.42764147 | -4.39459843 | 0.03050491  |
| H | -3.58075762 | -5.44716100 | 1.26792903  |
| H | -1.93215401 | -3.21785809 | 0.02015716  |
| H | -1.97216402 | -6.25793296 | -0.22888185 |
| H | -2.61428188 | -4.09105507 | -2.27322074 |
| H | -0.54529403 | -7.19984541 | -1.51496742 |
| H | 1.51605709  | -4.34436699 | -2.43515535 |
| H | 3.59307237  | -6.33205471 | -1.45471062 |
| H | 1.68208168  | -4.77982944 | 0.31222749  |
| H | 1.50203311  | -7.75205288 | -0.23264549 |
| H | 5.29725722  | -5.35638619 | -0.54469011 |
| H | 6.23700926  | -3.53947293 | 0.80388649  |
| H | 3.84998157  | -1.92423647 | -0.16672755 |
| H | 6.76138184  | -1.44284724 | -0.89553461 |
| H | 4.52995144  | -2.51890757 | -2.66815301 |
| H | 7.00610134  | 0.54401688  | -1.64722792 |
| H | 6.13301322  | 2.76694491  | -0.85825668 |
| H | 3.47030313  | 1.28457900  | -0.86934151 |
| H | 4.58305030  | 3.67111502  | -2.40262405 |

|   |             |             |             |
|---|-------------|-------------|-------------|
| H | 3.78196197  | 0.88350682  | -3.36466768 |
| H | 3.26968900  | 4.76405826  | -3.60423933 |
| H | 0.24828746  | 2.64953681  | -3.64847024 |
| H | -0.71478052 | 5.52317783  | -3.32109577 |
| H | 0.59886694  | 3.66627352  | -1.28578847 |
| H | 1.55853671  | 6.26166760  | -2.55833594 |
| H | -0.08990640 | 3.08334324  | -6.03085049 |
| H | -1.60352401 | 3.42663649  | -5.15934385 |
| H | 4.93176593  | 1.56883100  | -5.44275281 |
| H | 3.53177759  | 2.60313611  | -5.08972750 |
| H | 6.38697963  | -3.05424783 | -4.19034853 |
| H | 6.35993239  | -1.31925367 | -3.81010918 |
| H | 2.05319298  | -5.30759335 | -4.61021868 |
| H | 3.55282696  | -4.77407064 | -3.81901384 |
| H | -3.44987647 | -5.98775414 | -3.61857036 |
| H | -1.70161936 | -6.10642952 | -3.34113731 |
| H | -4.76797741 | -3.46165198 | -3.38389993 |
| H | -5.21267238 | -2.18184682 | -4.53593769 |
| H | -5.17005566 | 1.12018452  | -4.44757996 |
| H | -4.28924956 | 2.26046506  | -5.48877363 |
| H | 2.94561569  | 7.40499543  | -1.02983630 |
| H | 4.07127431  | 6.44219322  | -2.02924706 |
| H | 6.71982726  | 2.95311750  | 1.49111891  |
| H | 7.76914697  | 1.85217325  | 0.55298790  |
| H | 5.19462101  | -2.75705305 | 3.00940038  |
| H | 5.63995828  | -4.49050819 | 2.96559021  |
| H | 0.47676448  | -8.71770058 | 1.57295513  |
| H | -1.02198309 | -8.29208860 | 0.69775266  |
| H | -3.61697773 | -3.71412931 | 4.00330342  |
| H | -4.10931578 | -5.18879868 | 3.14678037  |
| H | -8.34316444 | 0.81177002  | 1.57913407  |
| H | -8.54388062 | 1.43265653  | -0.08433201 |
| H | -4.25154403 | 5.59402299  | 1.10978865  |
| H | -3.91997321 | 6.91650053  | -0.05086483 |
| H | -7.18341849 | 2.98858374  | 2.13692841  |
| H | -5.78477942 | -2.68416623 | 3.63352212  |
| H | -0.31438984 | -7.42569970 | 3.53303626  |
| H | 2.84490429  | -3.44173460 | 3.56584385  |
| H | 6.34297990  | 1.03239084  | 3.10497938  |
| H | 3.93040493  | 6.32802712  | 1.00592796  |
| H | -1.90845756 | 5.85668900  | 1.97130250  |
| H | -9.62213401 | 2.71780445  | 2.59681292  |
| H | -9.99220952 | 3.26947214  | 0.94632000  |
| H | -9.24326850 | 4.38006221  | 2.09834146  |
| H | -3.80446631 | 6.96035155  | 3.14167366  |
| H | -3.63916806 | 8.38089819  | 2.08172213  |
| H | -2.34327766 | 7.96578296  | 3.21173827  |
| H | 4.80047087  | 8.53097334  | 0.22903412  |
| H | 5.95656890  | 7.70180001  | -0.83925233 |
| H | 6.10350551  | 7.54051295  | 0.91528181  |
| H | 8.06856048  | 2.75484276  | 3.59915161  |
| H | 9.26146770  | 1.84308541  | 2.64471031  |
| H | 8.60966535  | 1.14907917  | 4.13326179  |
| H | 4.38958827  | -2.72014105 | 5.35753356  |
| H | 5.03071962  | -4.37361514 | 5.49726024  |
| H | 3.35283750  | -4.04379274 | 5.93733690  |
| H | -0.89230665 | -9.85378285 | 3.38622940  |
| H | -2.38564914 | -9.44236750 | 2.51306488  |

|   |             |             |             |
|---|-------------|-------------|-------------|
| H | -2.17534048 | -8.93313394 | 4.19417856  |
| H | -5.61079474 | -4.32751185 | 5.53681563  |
| H | -6.19904879 | -5.60340291 | 4.44735180  |
| H | -7.24903013 | -4.24090768 | 4.86057861  |
| H | -1.10065031 | 5.15786748  | -0.57570795 |
| H | 3.06212169  | 3.78138576  | -0.35254149 |
| H | 6.20608089  | 3.27315616  | -4.53240067 |
| H | 5.22553988  | -0.23075230 | 0.91101398  |
| H | 8.05893011  | -3.21642729 | -2.61785551 |
| H | 3.66808076  | -5.40819291 | 1.19270516  |
| H | -0.53165660 | -5.16816313 | 1.31252634  |
| H | -3.66898399 | -7.50728157 | -1.89675521 |
| H | -7.33477434 | -2.35557573 | -3.61378492 |
| H | -4.96014331 | -2.17445396 | 1.44889098  |
| H | -5.21072343 | 2.27802967  | 0.35177732  |
| H | -5.83419724 | 3.83033182  | -4.77643153 |
| H | 0.27322081  | 5.36980780  | -5.91825851 |
| H | 2.60917515  | -7.41948323 | -3.86019639 |
| H | -6.53881377 | 3.77913462  | 0.20630234  |
| H | -0.96111176 | 7.00054817  | 0.21577448  |
| H | 4.82948551  | 4.47212705  | 0.18562261  |
| H | 6.92513347  | -0.72868339 | 1.85525234  |
| H | 2.96484482  | -5.70652217 | 2.94512119  |
| H | -1.72361060 | -5.94093012 | 2.69721484  |
| H | -6.65460078 | -3.27830424 | 1.82980794  |

255

2-HP-B-CD:trans-(1S,4R)-SRT\_4\_Cl E(Ha)= -7253.8754928698

|    |             |             |             |
|----|-------------|-------------|-------------|
| Cl | -0.52903700 | -1.13049237 | 13.50827596 |
| Cl | -0.80786207 | -0.23701145 | 10.45462961 |
| O  | 1.67832174  | 6.84155807  | 0.40133221  |
| O  | 3.85330039  | 4.16768847  | -0.82804720 |
| O  | 5.59113333  | 3.44869216  | 0.52724004  |
| O  | 4.83210501  | -0.05374590 | -0.22658232 |
| O  | 4.82250154  | -1.56242082 | 1.51985294  |
| O  | 2.24363804  | -3.53038414 | -0.16711335 |
| O  | 0.94850221  | -4.87963148 | 1.18689729  |
| O  | -2.09880538 | -3.72348394 | -0.45929468 |
| O  | -4.02196438 | -3.67172472 | 0.81958047  |
| O  | -4.81477218 | -0.34655563 | -0.50271391 |
| O  | -5.82350663 | 1.19926418  | 0.89257111  |
| O  | -3.96314626 | 3.97564156  | -0.60121573 |
| O  | -3.40071027 | 5.79245349  | 0.72118982  |
| O  | -4.47305979 | 5.58503815  | -2.72414679 |
| O  | -1.81114807 | 6.63503585  | -3.00574309 |
| O  | -0.09445229 | 6.00048463  | -0.83111192 |
| O  | -5.58168404 | 3.10390753  | -2.77371015 |
| O  | -6.40391127 | 0.36055432  | -2.57438792 |
| O  | -6.15272554 | 3.53865926  | 2.30346666  |
| O  | -5.05425603 | -1.98893984 | -2.82928608 |
| O  | -3.56663946 | -4.40602171 | -2.71446649 |
| O  | -6.14926176 | -2.49945267 | 2.13683331  |
| O  | 2.00434856  | -5.34333527 | -2.27640221 |
| O  | -0.81943835 | -5.15359371 | -2.53268386 |
| O  | 4.43734529  | -3.86519514 | -1.87780608 |
| O  | 6.35257805  | -1.73009476 | -1.77659125 |
| O  | 3.74774366  | -3.44482085 | 3.18505279  |
| O  | 6.88426644  | 1.54907503  | 2.19175086  |
| O  | 5.34283593  | 3.75552901  | -3.07182457 |
| O  | 5.72217913  | 0.92537292  | -2.73756016 |
| O  | 3.32092772  | 5.62809269  | -3.19741568 |
| O  | 0.86900155  | 7.13338692  | -3.11125438 |
| O  | 4.08375807  | 6.83039815  | 1.71749198  |
| O  | -1.79725418 | 7.59002790  | 2.02785063  |
| O  | -0.92232953 | -5.73642061 | 2.67560429  |
| O  | 5.90032989  | 6.26994040  | -4.26754845 |
| O  | -0.85931831 | 9.09843537  | -4.19011386 |
| O  | -7.09668245 | 5.37634383  | -3.74960556 |
| O  | -7.80037893 | -1.79828246 | -3.72194708 |
| O  | -2.84086677 | -7.07124024 | -2.26932937 |
| O  | 4.29083041  | -6.60743318 | -1.31669562 |
| O  | 8.37907286  | 0.28711323  | -2.25315971 |
| N  | -1.47723020 | -6.77146672 | 5.12069549  |
| C  | -0.62184286 | -7.97043167 | 5.31871737  |
| C  | -0.53798393 | -4.60316942 | 11.53897766 |
| C  | -0.49933416 | -3.64668185 | 12.54650360 |
| C  | -0.58316246 | -2.29174824 | 12.23724304 |
| C  | -0.70548259 | -1.90207771 | 10.89720157 |
| C  | -0.74364944 | -2.86682288 | 9.89605644  |
| C  | -0.66178699 | -4.22586087 | 10.20206401 |
| C  | 0.21482834  | -5.04196632 | 7.96231658  |
| C  | -0.12467237 | -5.28076115 | 6.61992935  |
| C  | 0.81383642  | -5.01395834 | 5.61247467  |
| C  | 2.08990097  | -4.55571035 | 5.91107518  |



|   |             |             |             |
|---|-------------|-------------|-------------|
| C | 2.43812253  | -4.35517333 | 7.24546030  |
| C | 1.50899413  | -4.59075782 | 8.24860470  |
| C | -0.76447148 | -5.26795232 | 9.10634127  |
| C | -2.20806029 | -5.36581398 | 8.60053873  |
| C | -2.29878704 | -6.32503834 | 7.42334496  |
| C | -1.51350265 | -5.75780449 | 6.25050917  |
| C | 2.41281329  | 5.61797664  | 0.45946028  |
| C | 3.28803558  | 5.47216527  | -0.78416841 |
| C | 2.48521665  | 5.65324550  | -2.06672795 |
| C | 1.72931239  | 6.96820962  | -2.00955045 |
| C | 0.87592587  | 7.00758512  | -0.73735989 |
| C | 5.23983317  | 4.02389009  | -0.70628038 |
| C | 5.02452721  | 2.15957726  | 0.75424932  |
| C | 5.49071844  | 1.20376211  | -0.34118368 |
| C | 5.16708959  | 1.74298835  | -1.72812224 |
| C | 5.73213340  | 3.14839185  | -1.86349952 |
| C | 5.52489225  | -1.10402107 | 0.38797248  |
| C | 5.68764901  | -2.23091989 | -0.64252500 |
| C | 4.31443562  | -2.75536081 | -1.02103309 |
| C | 3.55461424  | -3.14990673 | 0.24097342  |
| C | 3.49569709  | -2.00920928 | 1.25265729  |
| C | 1.83364107  | -4.83569254 | 0.07336324  |
| C | -0.24976561 | -4.11985724 | 1.03010837  |
| C | -1.01523776 | -4.59115170 | -0.20452398 |
| C | -0.13123292 | -4.58434932 | -1.44927633 |
| C | 1.13243093  | -5.38154513 | -1.17539189 |
| C | -3.41305641 | -4.20532936 | -0.32848230 |
| C | -4.18727369 | -3.82568133 | -1.59104179 |
| C | -4.27215804 | -2.31564059 | -1.71408277 |
| C | -4.87855957 | -1.75927712 | -0.42718536 |
| C | -4.13584163 | -2.23982630 | 0.82015502  |
| C | -5.98372803 | 0.39530950  | -0.24163283 |
| C | -6.30696547 | 1.23832307  | -1.47778095 |
| C | -5.23273090 | 2.29079796  | -1.68414069 |
| C | -5.06621448 | 3.10460843  | -0.40605249 |
| C | -4.80761643 | 2.20446556  | 0.80091118  |
| C | -4.13828734 | 5.35279456  | -0.38581212 |
| C | -1.98332601 | 5.63279652  | 0.62160081  |
| C | -1.46014786 | 6.33662236  | -0.62890832 |
| C | -2.22029672 | 5.90460893  | -1.87770445 |
| C | -3.70993095 | 6.09424997  | -1.65619927 |
| C | -1.42886573 | 6.24053281  | 1.89997406  |
| C | -4.88439016 | 2.96462761  | 2.11451838  |
| C | -4.87769627 | -1.90223229 | 2.10160657  |
| C | -1.00459767 | -4.34672022 | 2.33208463  |
| C | 2.94947391  | -2.43897621 | 2.60246609  |
| C | 5.49119878  | 1.73868236  | 2.13678845  |
| C | 3.23332017  | 5.71261812  | 1.73569114  |
| C | -4.97712662 | 6.53644857  | -3.65802116 |
| C | -7.48956260 | 0.58567972  | -3.47105127 |
| C | -4.27891269 | -5.46529083 | -3.35210646 |
| C | 2.40400507  | -6.60060095 | -2.82174360 |
| C | 7.75451491  | -1.99520771 | -1.78822272 |
| C | 6.35054723  | 3.90787524  | -4.06910529 |
| C | 1.30317783  | 8.02275777  | -4.13649145 |
| C | 5.95926998  | 5.05966269  | -4.98570518 |
| C | 8.45725337  | -1.03459831 | -2.73536480 |
| C | 3.90683363  | -6.81640926 | -2.66381293 |

|   |             |             |             |
|---|-------------|-------------|-------------|
| C | -3.38501954 | -6.68816376 | -3.52030908 |
| C | -7.57379180 | -0.59765881 | -4.42489267 |
| C | -6.01831822 | 5.84428753  | -4.52659279 |
| C | 0.09288762  | 8.41610373  | -4.97276492 |
| C | 6.98220487  | 5.22254101  | -6.09545258 |
| C | 0.50852168  | 9.33629595  | -6.10579663 |
| C | -6.57386969 | 6.80898275  | -5.55782600 |
| C | -8.71698209 | -0.40709043 | -5.40447653 |
| C | -4.17575550 | -7.85027879 | -4.09227794 |
| C | 4.28817002  | -8.22502712 | -3.08037544 |
| C | 9.92477567  | -1.40262643 | -2.86562638 |
| H | -0.97302003 | -8.54360802 | 6.17573616  |
| H | 0.40380140  | -7.64451687 | 5.48599908  |
| H | -0.68037706 | -8.58498707 | 4.41938706  |
| H | -1.20493596 | -6.30138565 | 4.21336436  |
| H | -2.44019989 | -7.08084034 | 4.97067112  |
| H | -0.46973820 | -5.65513146 | 11.80354915 |
| H | -0.40193979 | -3.94147687 | 13.58581533 |
| H | -0.82381754 | -2.53737323 | 8.86442117  |
| H | 0.55217412  | -5.16657733 | 4.56800697  |
| H | 2.79253190  | -4.34437946 | 5.10787286  |
| H | 3.43158545  | -4.00094926 | 7.50326401  |
| H | 1.77824833  | -4.40679299 | 9.28463395  |
| H | -0.51186395 | -6.23751152 | 9.56148519  |
| H | -2.56303454 | -4.37095708 | 8.30234879  |
| H | -2.86036266 | -5.69822067 | 9.41296500  |
| H | -3.34398840 | -6.48595909 | 7.13133945  |
| H | -1.88773608 | -7.29655806 | 7.72532181  |
| H | -2.08325236 | -4.92271875 | 5.81990499  |
| H | 1.72254430  | 4.76376766  | 0.51232488  |
| H | 4.08250165  | 6.22931873  | -0.73914325 |
| H | 1.74331790  | 4.84241653  | -2.12590430 |
| H | 2.44735844  | 7.79908188  | -1.96446694 |
| H | 0.40374950  | 7.98994087  | -0.62957893 |
| H | 5.73723923  | 4.99915104  | -0.73521375 |
| H | 3.92674000  | 2.22080195  | 0.73732486  |
| H | 6.57677269  | 1.06515785  | -0.26061045 |
| H | 4.07453221  | 1.79618319  | -1.84381882 |
| H | 6.82811586  | 3.09595171  | -1.80195696 |
| H | 6.49511915  | -0.76231101 | 0.76395230  |
| H | 6.26311461  | -3.05081801 | -0.18884684 |
| H | 3.76162629  | -1.94661475 | -1.52064828 |
| H | 4.05910872  | -4.00094265 | 0.71831875  |
| H | 2.89008033  | -1.18715212 | 0.84697397  |
| H | 2.67477498  | -5.48527912 | 0.33373619  |
| H | -0.01803316 | -3.05305834 | 0.91675954  |
| H | -1.37654974 | -5.61666448 | -0.03343864 |
| H | 0.15149340  | -3.54481139 | -1.67095751 |
| H | 0.84578091  | -6.42024533 | -0.95903411 |
| H | -3.41454241 | -5.29525687 | -0.21231484 |
| H | -5.20871884 | -4.21437806 | -1.48374650 |
| H | -3.25397419 | -1.91070339 | -1.82195121 |
| H | -5.92377591 | -2.09126658 | -0.36089558 |
| H | -3.13546960 | -1.78517385 | 0.83248498  |
| H | -6.81664797 | -0.27888359 | -0.01422943 |
| H | -7.27120161 | 1.73787877  | -1.30800397 |
| H | -4.28245740 | 1.77072169  | -1.88371273 |
| H | -5.98162361 | 3.68225338  | -0.21917973 |

|   |             |             |             |
|---|-------------|-------------|-------------|
| H | -3.82065993 | 1.73315599  | 0.69153442  |
| H | -5.18557662 | 5.57337445  | -0.15298850 |
| H | -1.72680264 | 4.56532631  | 0.56418956  |
| H | -1.56979438 | 7.42064422  | -0.48964126 |
| H | -2.03826049 | 4.82992494  | -2.03357066 |
| H | -3.92343283 | 7.16343541  | -1.51671470 |
| H | -1.77387593 | 5.63918530  | 2.75546947  |
| H | -0.33603950 | 6.20690296  | 1.87169033  |
| H | -4.61905309 | 2.27927686  | 2.93482522  |
| H | -4.15907287 | 3.78304416  | 2.10027371  |
| H | -4.25716731 | -2.21250228 | 2.95883942  |
| H | -5.02354180 | -0.81994112 | 2.16149146  |
| H | -0.55941961 | -3.74074397 | 3.13199116  |
| H | -2.05942548 | -4.08342975 | 2.21271891  |
| H | 2.87704503  | -1.55419532 | 3.25166143  |
| H | 1.94915342  | -2.85974928 | 2.47423271  |
| H | 5.02929729  | 0.78264302  | 2.39945663  |
| H | 5.15278677  | 2.49449283  | 2.86121628  |
| H | 3.86944785  | 4.82731621  | 1.82347675  |
| H | 2.54606010  | 5.73480855  | 2.59550383  |
| H | -4.15325321 | 6.93751509  | -4.26059527 |
| H | -5.46126547 | 7.36071866  | -3.11480721 |
| H | -7.33455420 | 1.52664551  | -4.01242826 |
| H | -8.42682497 | 0.64781821  | -2.89935475 |
| H | -4.64674157 | -5.11017414 | -4.32251377 |
| H | -5.14441102 | -5.75035997 | -2.74074044 |
| H | 2.11705743  | -6.61834378 | -3.87944888 |
| H | 1.86856849  | -7.41106249 | -2.31120236 |
| H | 7.91883122  | -3.03910535 | -2.09114994 |
| H | 8.17792141  | -1.84779634 | -0.78429800 |
| H | 6.46295661  | 2.96899794  | -4.62620922 |
| H | 7.30823262  | 4.15616338  | -3.59140677 |
| H | 2.07533421  | 7.53718105  | -4.74598690 |
| H | 1.72368049  | 8.93063547  | -3.68124676 |
| H | 4.97788857  | 4.82353898  | -5.43022758 |
| H | 7.97340368  | -1.11859754 | -3.72230108 |
| H | 4.42835920  | -6.09530413 | -3.31064591 |
| H | -2.57054652 | -6.42968241 | -4.21445159 |
| H | -6.62391071 | -0.64965179 | -4.98328912 |
| H | -5.52182303 | 5.00647561  | -5.04529163 |
| H | -0.34107391 | 7.49423077  | -5.39581602 |
| H | 7.07269762  | 4.31295007  | -6.69653829 |
| H | 7.96264393  | 5.46403117  | -5.67268641 |
| H | 6.68687709  | 6.04651523  | -6.74856530 |
| H | 1.24513808  | 8.86067613  | -6.75987055 |
| H | 0.93853047  | 10.25929254 | -5.70412113 |
| H | -0.36712740 | 9.60532666  | -6.70051256 |
| H | -5.78437053 | 7.20427280  | -6.20351707 |
| H | -7.07410624 | 7.64608017  | -5.06067787 |
| H | -7.31239930 | 6.29769214  | -6.17915566 |
| H | -8.59724512 | 0.51062503  | -5.98749977 |
| H | -9.67003541 | -0.36106578 | -4.86808835 |
| H | -8.75815844 | -1.25569151 | -6.09080768 |
| H | -4.64256556 | -7.58678342 | -5.04620865 |
| H | -4.96142706 | -8.15346848 | -3.39271439 |
| H | -3.51764342 | -8.70707216 | -4.25272650 |
| H | 3.96933762  | -8.44062642 | -4.10499789 |
| H | 3.82376539  | -8.95575923 | -2.41025010 |

|   |             |             |             |
|---|-------------|-------------|-------------|
| H | 5.37111638  | -8.35286766 | -3.02046124 |
| H | 10.05459384 | -2.41638214 | -3.25575937 |
| H | 10.42116792 | -1.33338352 | -1.89223268 |
| H | 10.41760023 | -0.70151012 | -3.54242761 |
| H | -0.83887112 | 6.55043004  | -3.06625271 |
| H | -4.94670934 | 3.84753733  | -2.79937411 |
| H | -6.78829948 | 2.81504812  | 2.25299097  |
| H | -5.26667569 | -1.03579426 | -2.77254877 |
| H | -6.01470915 | -3.43563486 | 1.94821290  |
| H | -1.63762546 | -4.63657553 | -2.67199515 |
| H | 3.53555540  | -4.12091614 | -2.14725564 |
| H | 4.64559010  | -3.09016157 | 3.21057228  |
| H | 7.28936897  | 2.38784829  | 1.94150313  |
| H | 5.57518182  | -0.00245655 | -2.48161374 |
| H | 3.83168800  | 4.79610133  | -3.15658286 |
| H | 3.51515992  | 7.59966514  | 1.59335998  |
| H | -2.76108862 | 7.61041546  | 1.99662637  |
| H | -0.06285222 | -6.01343605 | 2.30763916  |
| H | 5.05204142  | 6.30082405  | -3.80212370 |
| H | -1.33071589 | 8.44638427  | -3.65290409 |
| H | -6.80171114 | 4.58793030  | -3.27272951 |
| H | -6.96190060 | -2.06717883 | -3.32036795 |
| H | -1.98792575 | -6.61390248 | -2.21076524 |
| H | 4.60001439  | -5.68908612 | -1.27494328 |
| H | 7.51052594  | 0.64202806  | -2.50914918 |

255

2-HP-B-CD:trans-(1S,4R)-SRT\_5\_Cl E(Ha)= -7253.8730853111

|    |             |             |             |
|----|-------------|-------------|-------------|
| Cl | -0.45037828 | 2.09502887  | -0.41816454 |
| Cl | -0.94320558 | 1.73667670  | 2.71822305  |
| O  | 3.86006312  | -3.70721018 | -3.58576220 |
| O  | 6.14383633  | 0.91229150  | -2.47231633 |
| O  | 3.88161797  | 3.42712722  | -1.06563790 |
| O  | 3.47065967  | 5.36098248  | -2.26923396 |
| O  | 0.00286077  | 5.51758508  | -1.10872953 |
| O  | -1.63352469 | 6.27979996  | -2.55873520 |
| O  | -3.94437463 | 3.76093064  | -1.26138174 |
| O  | -5.48549498 | 2.79022595  | -2.69046482 |
| O  | -4.80455309 | -0.49967853 | -1.24885414 |
| O  | -5.42689045 | -2.42357980 | -2.38624069 |
| O  | -2.13837463 | -3.94399306 | -1.83568184 |
| O  | -1.09715775 | -5.10769297 | -3.53659390 |
| O  | -1.71462850 | -6.03396153 | -0.06673893 |
| O  | 1.13424672  | -5.77428317 | -0.11224491 |
| O  | 2.12738662  | -4.12940738 | -2.09577214 |
| O  | -3.12137500 | -3.72948421 | 0.79855505  |
| O  | -5.16570471 | -1.82585554 | 1.20466332  |
| O  | -4.90171189 | -4.78318063 | -3.86411997 |
| O  | -5.96726893 | 0.86286303  | 0.93570043  |
| O  | -5.71786388 | 3.73117125  | 0.79621082  |
| O  | -6.71606246 | 0.82858261  | -4.12920978 |
| O  | -1.09122057 | 6.86571459  | 0.96506200  |
| O  | -3.63113683 | 5.50179820  | 0.97343194  |
| O  | 1.46599943  | 5.95461889  | 1.29305250  |
| O  | 4.10153978  | 4.79157461  | 1.24175507  |
| O  | 1.96347355  | 7.24579230  | -3.63317125 |
| O  | 6.68225345  | 3.49595664  | -3.36463034 |
| O  | 5.90014225  | -0.45915998 | 0.86933340  |
| O  | 4.92352624  | 2.20498438  | 1.26377159  |
| O  | 5.50929565  | -2.99919002 | 0.12655164  |
| O  | 3.90094332  | -5.26897977 | -0.27677972 |
| O  | 5.81707665  | -2.27941118 | -4.86877221 |
| O  | 1.03645084  | -5.75997618 | -5.18224296 |
| O  | -3.93969488 | 6.16020878  | -4.06491481 |
| O  | 5.90870454  | -2.45602370 | 2.99870663  |
| O  | 2.86122257  | -7.01693284 | 1.64707002  |
| O  | -4.49712792 | -6.12968424 | 0.87046829  |
| O  | -7.88668713 | -1.16821628 | 1.21887586  |
| O  | -6.28463018 | 6.35026824  | 1.71618321  |
| O  | 0.71837652  | 8.57115276  | 2.29027950  |
| O  | 6.36219896  | 4.16956361  | 2.80876773  |
| O  | 4.86092891  | -0.81549781 | -1.60894222 |
| N  | 2.65341973  | -5.60250724 | 5.38837396  |
| C  | 2.07210394  | -6.79935507 | 4.70754636  |
| C  | 0.80802743  | -1.62618906 | 0.28738168  |
| C  | 0.47488991  | -0.43391574 | -0.34047764 |
| C  | -0.06585278 | 0.61978485  | 0.39071232  |
| C  | -0.27260214 | 0.46315948  | 1.76550357  |
| C  | 0.06953448  | -0.73559112 | 2.38734113  |
| C  | 0.60864468  | -1.79596182 | 1.65971592  |
| C  | 0.25289492  | -3.53700945 | 3.49998528  |
| C  | 0.82786315  | -4.05782004 | 4.67151738  |
| C  | 0.00578289  | -4.40846650 | 5.75176102  |
| C  | -1.37583038 | -4.32567723 | 5.66148605  |

|   |             |             |             |
|---|-------------|-------------|-------------|
| C | -1.95071658 | -3.87808631 | 4.47376719  |
| C | -1.14433708 | -3.47714346 | 3.41752587  |
| C | 1.10302669  | -3.06208759 | 2.33389357  |
| C | 2.56178498  | -2.85195255 | 2.75672577  |
| C | 3.09497332  | -4.06729797 | 3.49526398  |
| C | 2.32441827  | -4.22902572 | 4.79321292  |
| C | 4.01317928  | -2.32299602 | -3.26062410 |
| C | 4.93543120  | -2.15943457 | -2.05630733 |
| C | 4.53292114  | -3.05079689 | -0.88315136 |
| C | 4.36675488  | -4.48126485 | -1.35773808 |
| C | 3.39805943  | -4.52363352 | -2.55123468 |
| C | 6.04053815  | -0.06362648 | -1.47884449 |
| C | 5.09810536  | 1.89140518  | -2.48494406 |
| C | 5.02124652  | 2.58750544  | -1.12769357 |
| C | 4.89495390  | 1.57753788  | 0.00600750  |
| C | 6.03509173  | 0.57747058  | -0.08644056 |
| C | 4.07239738  | 4.82141927  | -1.12859995 |
| C | 3.49425804  | 5.44219762  | 0.14684424  |
| C | 1.98375217  | 5.28708307  | 0.16850386  |
| C | 1.38893652  | 5.82631358  | -1.12673451 |
| C | 2.05116389  | 5.19601780  | -2.34989042 |
| C | -0.92406159 | 6.53876784  | -1.37881096 |
| C | -2.39081650 | 5.06803947  | -2.56183328 |
| C | -3.37311935 | 5.05645889  | -1.39197096 |
| C | -2.69105945 | 5.37082927  | -0.06578505 |
| C | -1.87672810 | 6.64559936  | -0.18373278 |
| C | -5.30287498 | 3.57656583  | -1.54233815 |
| C | -5.95007794 | 2.90869807  | -0.32265630 |
| C | -5.34887612 | 1.52760312  | -0.14338334 |
| C | -5.50336317 | 0.72624704  | -1.42913409 |
| C | -4.93213614 | 1.47401288  | -2.63150894 |
| C | -5.54329254 | -1.68610608 | -1.19339676 |
| C | -5.02955297 | -2.52199888 | -0.01581018 |
| C | -3.57970920 | -2.90729036 | -0.26255614 |
| C | -3.50770211 | -3.64450182 | -1.59240080 |
| C | -4.09419954 | -2.80166324 | -2.72239597 |
| C | -1.81906563 | -5.21588042 | -2.34104536 |
| C | 0.11198230  | -4.35331949 | -3.44604495 |
| C | 1.00964752  | -4.96589230 | -2.37393332 |
| C | 0.28144131  | -5.15034429 | -1.04897224 |
| C | -0.98690464 | -5.94843829 | -1.27294909 |
| C | 0.73955552  | -4.43115952 | -4.82834217 |
| C | -4.19498359 | -3.57606996 | -4.02526828 |
| C | -5.32368606 | 0.82800774  | -3.95118984 |
| C | -3.09900784 | 5.04524952  | -3.90667204 |
| C | 1.64137318  | 5.87742463  | -3.64450444 |
| C | 5.45618041  | 2.85167846  | -3.60667193 |
| C | 4.59756393  | -1.68300748 | -4.51076453 |
| C | -2.50043230 | -7.21974815 | 0.04477209  |
| C | -6.04145762 | -2.40174328 | 2.17150329  |
| C | -6.83604194 | 4.00023630  | 1.63451312  |
| C | -1.55521202 | 7.86086366  | 1.87142739  |
| C | 4.47407222  | 5.61656752  | 2.34275347  |
| C | 6.54093374  | -0.25343463 | 2.13118284  |
| C | 4.11689588  | -6.66306235 | -0.41796405 |
| C | 5.79816079  | -1.05511264 | 3.18762793  |
| C | 5.19987884  | 4.74674557  | 3.35916160  |
| C | -0.46238780 | 8.10823450  | 2.90207032  |

|   |             |             |             |
|---|-------------|-------------|-------------|
| C | -6.50520979 | 5.20555302  | 2.50502003  |
| C | -7.25096830 | -1.50510067 | 2.43399282  |
| C | -3.50396851 | -7.07743770 | 1.18056433  |
| C | 4.05647691  | -7.33212110 | 0.94729043  |
| C | 6.34762809  | -0.75212533 | 4.56898036  |
| C | 4.23664338  | -8.83682148 | 0.81331433  |
| C | -4.19713757 | -8.40407986 | 1.43739997  |
| C | -8.24814339 | -2.21381072 | 3.33286613  |
| C | -7.65367993 | 5.50686661  | 3.45069815  |
| C | -0.90602927 | 9.15680760  | 3.90531904  |
| C | 5.61992191  | 5.57130235  | 4.56129816  |
| H | 0.98719955  | -6.71046717 | 4.74009359  |
| H | 2.39482742  | -7.68557596 | 5.25600399  |
| H | 3.67361778  | -5.68228828 | 5.39249329  |
| H | 1.24150173  | -2.42697392 | -0.30540762 |
| H | 0.63364689  | -0.30681534 | -1.40620620 |
| H | -0.10044784 | -0.82853107 | 3.45524458  |
| H | 0.44179981  | -4.74417761 | 6.69325408  |
| H | -1.99608382 | -4.60607317 | 6.50702036  |
| H | -3.03040623 | -3.82413395 | 4.37205837  |
| H | -1.61531429 | -3.11431398 | 2.50782456  |
| H | 1.08869129  | -3.86709395 | 1.58401598  |
| H | 2.63255706  | -1.95716978 | 3.38898052  |
| H | 3.18122474  | -2.66235851 | 1.87645351  |
| H | 4.16271340  | -3.92390880 | 3.70075230  |
| H | 2.97619330  | -4.94895607 | 2.85243239  |
| H | 2.72101810  | -3.53179060 | 5.54398019  |
| H | 2.36189192  | -5.61156323 | 6.36719598  |
| H | 2.41829605  | -6.84583411 | 3.67123903  |
| H | 0.05960239  | -3.95623983 | -5.55021532 |
| H | -2.34120078 | 4.98767240  | -4.70295275 |
| H | -2.73073181 | -5.76800265 | -2.59446761 |
| H | -0.73086313 | -6.95405696 | -1.63676633 |
| H | -0.01808776 | -4.15999744 | -0.67820303 |
| H | 1.98969683  | -5.30405913 | -0.16057860 |
| H | 1.35260656  | -5.94429723 | -2.73810566 |
| H | -0.11095862 | -3.30980266 | -3.18448252 |
| H | 1.68424067  | -3.88031868 | -4.83062839 |
| H | -6.61131467 | -1.48809867 | -1.06031749 |
| H | -5.63201222 | -3.43946206 | 0.01137919  |
| H | -2.96735885 | -1.99642307 | -0.31453185 |
| H | -2.41597409 | -4.30131567 | 0.44144381  |
| H | -4.08522455 | -4.57492456 | -1.50965167 |
| H | -3.46851556 | -1.90889886 | -2.86694791 |
| H | -4.66112068 | -2.92736683 | -4.78083458 |
| H | -3.19093872 | -3.83772802 | -4.37177475 |
| H | -5.78925831 | -4.54701974 | -3.56977070 |
| H | -5.78955615 | 4.53437085  | -1.75597834 |
| H | -7.02913391 | 2.81944402  | -0.51035217 |
| H | -4.27549734 | 1.65362200  | 0.05947037  |
| H | -5.47089619 | 0.03303199  | 1.07367814  |
| H | -6.56716018 | 0.53269137  | -1.62389378 |
| H | -3.83814849 | 1.52602434  | -2.53826292 |
| H | -4.80509887 | 1.35161774  | -4.76894493 |
| H | -5.00013531 | -0.21651613 | -3.95149403 |
| H | -6.99230636 | 1.75139655  | -4.07891840 |
| H | -0.40767609 | 7.49044319  | -1.54335782 |
| H | -2.54974191 | 7.49755336  | -0.35340660 |

|   |             |             |             |
|---|-------------|-------------|-------------|
| H | -1.99425842 | 4.55068621  | 0.16127611  |
| H | -4.17139611 | 4.68801080  | 0.97052129  |
| H | -4.15559532 | 5.80222848  | -1.58666062 |
| H | -1.71950818 | 4.20217444  | -2.47477665 |
| H | -3.73066255 | 4.15425304  | -3.96717179 |
| H | 5.13923074  | 5.05360942  | -1.21627032 |
| H | 3.74876033  | 6.51131880  | 0.15469902  |
| H | 1.75479648  | 4.21190433  | 0.22585948  |
| H | 0.49349461  | 5.97280178  | 1.19961686  |
| H | 1.53706765  | 6.91358353  | -1.17182695 |
| H | 1.79753125  | 4.12722944  | -2.38726826 |
| H | 2.11832555  | 5.35143025  | -4.48557430 |
| H | 0.55664500  | 5.80369879  | -3.76316169 |
| H | 2.91740209  | 7.30127020  | -3.50389555 |
| H | 6.92011409  | -0.70708446 | -1.59879155 |
| H | 6.99356023  | 1.09680261  | 0.05288340  |
| H | 3.95045458  | 1.02631414  | -0.12094148 |
| H | 4.34540929  | 2.99344923  | 1.21490301  |
| H | 5.93848793  | 3.17555165  | -0.98821878 |
| H | 4.13270791  | 1.40962078  | -2.69543557 |
| H | 4.69056935  | 3.63015500  | -3.67008373 |
| H | 5.46537878  | 2.29704764  | -4.55689623 |
| H | 7.35274413  | 2.80482594  | -3.32048300 |
| H | 3.34443951  | -5.52952749 | -2.98366456 |
| H | 5.34513754  | -4.85545005 | -1.69350924 |
| H | 3.56040949  | -2.68957127 | -0.51402487 |
| H | 5.70188542  | -2.04778846 | 0.27899844  |
| H | 5.95849806  | -2.40965173 | -2.36943070 |
| H | 3.03488027  | -1.88026642 | -3.02672469 |
| H | 4.80271011  | -0.62807189 | -4.30887386 |
| H | 3.85644028  | -1.74252975 | -5.32184774 |
| H | 5.62628824  | -3.20665598 | -5.05041414 |
| H | 0.19513911  | -6.23019550 | -5.20864663 |
| H | -3.37740408 | 6.93846902  | -3.97415164 |
| H | 6.49984299  | 0.80798997  | 2.39052101  |
| H | 7.58918877  | -0.58003312 | 2.07266965  |
| H | 3.58100870  | 6.07597890  | 2.78248697  |
| H | 5.15421764  | 6.40697104  | 1.99330241  |
| H | -2.48500430 | 7.52632038  | 2.34822038  |
| H | -1.74609350 | 8.79564374  | 1.32450965  |
| H | -7.06480250 | 3.11564308  | 2.24302896  |
| H | -7.71114632 | 4.24647579  | 1.01630753  |
| H | -5.47189529 | -2.55318954 | 3.09779495  |
| H | -1.83038632 | -8.07383368 | 0.22264324  |
| H | -3.05945346 | -7.40216861 | -0.88372743 |
| H | 5.10307289  | -6.85367632 | -0.86276160 |
| H | 3.35618043  | -7.10767547 | -1.07985870 |
| H | 4.74345733  | -0.73858510 | 3.13300829  |
| H | 4.86615454  | -6.91317696 | 1.55725637  |
| H | -2.94470528 | -6.77683317 | 2.08356335  |
| H | -6.89829943 | -0.59058952 | 2.93542522  |
| H | -5.60558469 | 4.95979456  | 3.09473880  |
| H | -0.27878267 | 7.15663520  | 3.43034090  |
| H | 4.49579335  | 3.96148098  | 3.68626268  |
| H | -7.87285518 | 4.65544026  | 4.10184258  |
| H | -8.55501794 | 5.75658742  | 2.88200869  |
| H | -7.40066907 | 6.36835043  | 4.07247096  |
| H | -1.81802869 | 8.85265485  | 4.42726511  |



|   |             |             |            |
|---|-------------|-------------|------------|
| H | -1.09141401 | 10.10907178 | 3.39849056 |
| H | -0.11634749 | 9.31746030  | 4.64262862 |
| H | 4.75729422  | 6.03097364  | 5.05204782 |
| H | 6.31255349  | 6.36104390  | 4.25421438 |
| H | 6.13618639  | 4.93431829  | 5.28320100 |
| H | 6.22973521  | 0.30561676  | 4.81887152 |
| H | 7.40908696  | -1.01233704 | 4.62461173 |
| H | 5.81776836  | -1.34614246 | 5.31845783 |
| H | 5.20244274  | -9.08778934 | 0.36366634 |
| H | 3.44634151  | -9.27173202 | 0.19180424 |
| H | 4.18761417  | -9.30778667 | 1.79797886 |
| H | -3.48641383 | -9.18451831 | 1.72460075 |
| H | -4.73492909 | -8.73061091 | 0.54169060 |
| H | -4.92869489 | -8.28328158 | 2.23919570 |
| H | -7.78639102 | -2.53522073 | 4.27213046 |
| H | -8.65275403 | -3.09414061 | 2.82344281 |
| H | -9.08106678 | -1.54694312 | 3.56584485 |
| H | 5.63723997  | -2.69774884 | 2.10016782 |
| H | 2.10677378  | -7.00320941 | 1.03684725 |
| H | -4.10915437 | -5.24208876 | 0.96342758 |
| H | -7.50354729 | -0.32274544 | 0.93890889 |
| H | -5.40073082 | 6.28261493  | 1.32675076 |
| H | 1.13001161  | 7.82383256  | 1.83262465 |
| H | 6.08376361  | 3.52614801  | 2.14154538 |
| H | -6.38560564 | -3.38313932 | 1.82232216 |

2-HP-B-CD:trans-(1S,4R)-SRT\_6\_Cl E(Ha)= -7253.8638721465

|    |             |             |             |
|----|-------------|-------------|-------------|
| Cl | 0.42170859  | 0.09574282  | -6.06531708 |
| Cl | 2.78222775  | 0.62680297  | -3.99955728 |
| O  | -6.12613316 | -0.40037912 | -0.97902008 |
| O  | -3.57352359 | -3.02941707 | -0.88505881 |
| O  | -3.33543267 | -4.76468727 | -2.39245111 |
| O  | 0.11883104  | -5.17473529 | -1.27431440 |
| O  | 1.91480791  | -5.48186375 | -2.69055046 |
| O  | 3.66063370  | -3.18113326 | -0.46933030 |
| O  | 5.75541397  | -2.21403072 | -0.74572883 |
| O  | 4.42257608  | 1.13591351  | -0.07095290 |
| O  | 5.17794461  | 2.94752019  | -1.30063959 |
| O  | 1.96082119  | 4.64919147  | -0.93018039 |
| O  | 0.90921937  | 5.61299935  | -2.73571831 |
| O  | -2.16499548 | 4.74293691  | -0.97570564 |
| O  | -4.13945274 | 4.35658468  | -2.13040806 |
| O  | -3.61549849 | 5.62401328  | 1.24389436  |
| O  | -4.81159112 | 3.08837833  | 1.75855546  |
| O  | -4.56927312 | 1.19930755  | -0.33675289 |
| O  | -1.15707227 | 6.88148567  | 0.60162510  |
| O  | 1.70593999  | 6.95572858  | 0.54913517  |
| O  | -1.24248553 | 6.08301488  | -4.37272377 |
| O  | 2.88747603  | 4.61068399  | 1.73406426  |
| O  | 4.74391518  | 2.50452216  | 2.28579738  |
| O  | 4.77971012  | 5.25107043  | -2.96339107 |
| O  | 3.94798283  | -2.97383975 | 2.33902579  |
| O  | 3.93546779  | -0.17739595 | 2.38515612  |
| O  | 3.32852872  | -5.46990860 | 1.21947799  |
| O  | 1.11845044  | -7.11092026 | 0.45751596  |
| O  | 4.42916567  | -4.97520307 | -3.68479687 |
| O  | -1.84192744 | -6.58048693 | -3.98768337 |
| O  | -3.90243959 | -4.85277709 | 1.20351188  |
| O  | -1.34500411 | -5.95684250 | 1.05125421  |
| O  | -3.63617887 | -2.20489445 | 1.83979865  |
| O  | -4.80074173 | 0.31348085  | 2.34948534  |
| O  | -6.85619123 | -2.92830656 | -2.08543416 |
| O  | -6.26609000 | 2.96976171  | -3.13466100 |
| O  | 7.55879187  | -0.09434145 | -1.24797185 |
| O  | -6.00347112 | -3.47958490 | 2.65462987  |
| O  | -7.14402735 | 1.83024283  | 2.69434038  |
| O  | -3.60053561 | 8.25608417  | 0.28433160  |
| O  | 4.46393610  | 6.90379748  | 1.44021063  |
| O  | 6.29398140  | 0.44879652  | 3.70562591  |
| O  | 5.80679132  | -5.04516627 | 2.58509621  |
| O  | -1.34210898 | -8.67119205 | 0.42906900  |
| N  | 0.05812091  | -1.45722879 | 3.94678956  |
| C  | -1.39324899 | -1.09974975 | 4.02266271  |
| C  | -1.20092136 | -0.90006299 | -2.55629299 |
| C  | -1.01051287 | -0.66217681 | -3.91242702 |
| C  | 0.20886982  | -0.17886129 | -4.37726584 |
| C  | 1.23745068  | 0.06844538  | -3.45931428 |
| C  | 1.03294593  | -0.14974937 | -2.09912395 |
| C  | -0.18612972 | -0.64641901 | -1.63165764 |
| C  | -0.18237354 | 0.19611359  | 0.76711405  |
| C  | 0.42926632  | 0.03828089  | 2.01924819  |
| C  | 0.72529350  | 1.16267237  | 2.80256815  |
| C  | 0.30789469  | 2.42800488  | 2.41995275  |

|   |             |             |             |
|---|-------------|-------------|-------------|
| C | -0.39977847 | 2.57047067  | 1.22730863  |
| C | -0.60417015 | 1.47703287  | 0.39868108  |
| C | -0.39103132 | -0.98184563 | -0.16766759 |
| C | 0.48349701  | -2.16706510 | 0.24114449  |
| C | 0.27929212  | -2.49118222 | 1.71233357  |
| C | 0.73911925  | -1.32597233 | 2.57455621  |
| C | -5.15523645 | -1.29838208 | -1.50401298 |
| C | -4.62668170 | -2.20747387 | -0.39257991 |
| C | -4.09795670 | -1.38221880 | 0.77502300  |
| C | -5.22067717 | -0.46320125 | 1.24295582  |
| C | -5.66055457 | 0.41716912  | 0.06667447  |
| C | -3.89523943 | -4.38264310 | -1.17610208 |
| C | -1.90859991 | -4.69368106 | -2.46504746 |
| C | -1.26097659 | -5.50860579 | -1.34485993 |
| C | -1.85608490 | -5.15358384 | 0.01467783  |
| C | -3.36828890 | -5.27019401 | -0.03857102 |
| C | 1.10798842  | -6.07716897 | -1.71978254 |
| C | 1.94711739  | -6.48267717 | -0.49740400 |
| C | 2.54141105  | -5.21381142 | 0.08055509  |
| C | 3.35035580  | -4.47463032 | -0.98226270 |
| C | 2.58004992  | -4.27935241 | -2.29111667 |
| C | 4.92826153  | -2.96647198 | 0.09712790  |
| C | 5.28230851  | -0.90414472 | -1.06554461 |
| C | 5.05259794  | -0.10110604 | 0.21626103  |
| C | 4.13717015  | -0.86195818 | 1.16350351  |
| C | 4.74911155  | -2.22763238 | 1.42899025  |
| C | 5.22510267  | 2.30115840  | -0.06544530 |
| C | 4.72125206  | 3.21448485  | 1.06021926  |
| C | 3.31424035  | 3.69397649  | 0.74527549  |
| C | 3.31299264  | 4.33443468  | -0.63847451 |
| C | 3.87411859  | 3.38616956  | -1.69346053 |
| C | 1.68077255  | 5.86021956  | -1.59584869 |
| C | 0.92587695  | 6.76943512  | -0.61358829 |
| C | -0.36291802 | 6.07210218  | -0.22982596 |
| C | -1.15399458 | 5.62676068  | -1.45583468 |
| C | -0.30108305 | 4.89400717  | -2.49029471 |
| C | -3.51526490 | 5.09876068  | -1.11506257 |
| C | -4.16063931 | 2.94084060  | -1.94887391 |
| C | -4.78396881 | 2.58274936  | -0.60018283 |
| C | -4.15613977 | 3.37066381  | 0.54346744  |
| C | -4.21713381 | 4.85353231  | 0.22651353  |
| C | -4.97930912 | 2.41167967  | -3.11697171 |
| C | -0.99507373 | 4.80744086  | -3.84018711 |
| C | 4.04114210  | 4.05574253  | -3.04591923 |
| C | 6.35057083  | -0.27787677 | -1.94543491 |
| C | 3.51125130  | -3.94069361 | -3.44492593 |
| C | -1.53025043 | -5.21831016 | -3.83947869 |
| C | -5.85126381 | -2.08748866 | -2.60007326 |
| C | -4.43023502 | 6.62486733  | 1.85411033  |
| C | 2.57604786  | 8.08292918  | 0.48933409  |
| C | 5.91599148  | 2.75604911  | 3.06318259  |
| C | 4.55758421  | -3.25360791 | 3.60368641  |
| C | 1.06758644  | -8.53267728 | 0.32372980  |
| C | -5.15185436 | -5.45822141 | 1.54073845  |
| C | -5.58608776 | 0.18525917  | 3.53711462  |
| C | -5.68648284 | -4.84606733 | 2.82665014  |
| C | -0.14726857 | -9.08680097 | 1.05275117  |
| C | 5.01024987  | -4.71067723 | 3.70585164  |

|   |             |              |             |
|---|-------------|--------------|-------------|
| C | 6.02819587  | 1.74514970   | 4.19445939  |
| C | 3.59648614  | 8.00378668   | 1.61492119  |
| C | -3.83155398 | 8.01534834   | 1.65843579  |
| C | -6.39321889 | 1.45036005   | 3.82939966  |
| C | -6.95157606 | -5.55965520  | 3.26574226  |
| C | -7.33920868 | 1.21276554   | 4.99303050  |
| C | -4.77448845 | 9.07721332   | 2.19554050  |
| C | 4.44436292  | 9.26245526   | 1.64965843  |
| C | 7.16301413  | 2.12599618   | 5.12829002  |
| C | 5.81324820  | -4.92837804  | 4.97593925  |
| C | -0.11788987 | -10.60493268 | 1.04234264  |
| H | -1.97010030 | -1.65117529  | 3.27673407  |
| H | -1.49139967 | -0.03227621  | 3.83196956  |
| H | -1.74553115 | -1.34041663  | 5.02663866  |
| H | 0.56789758  | -0.87217801  | 4.61132027  |
| H | 0.18741475  | -2.42348523  | 4.25739514  |
| H | -2.14645142 | -1.31155988  | -2.21411242 |
| H | -1.80381131 | -0.85665563  | -4.62677067 |
| H | 1.84250694  | 0.07520094   | -1.40979868 |
| H | 1.30173103  | 1.05079970   | 3.72071283  |
| H | 0.55031770  | 3.29418062   | 3.02641015  |
| H | -0.78263999 | 3.53760626   | 0.92570580  |
| H | -1.10361124 | 1.61506151   | -0.55600842 |
| H | -1.43331601 | -1.31144594  | -0.06588796 |
| H | 1.53943999  | -1.95823114  | 0.04292083  |
| H | 0.22854779  | -3.03731213  | -0.36815139 |
| H | 0.82985190  | -3.39477457  | 1.99702218  |
| H | -0.78746725 | -2.69129589  | 1.87602766  |
| H | 1.81192585  | -1.40830409  | 2.79580789  |
| H | -4.31573825 | -0.73297253  | -1.93465217 |
| H | -5.45536623 | -2.82925592  | -0.02991302 |
| H | -3.26965767 | -0.74882006  | 0.43234964  |
| H | -6.08575950 | -1.07514199  | 1.52619797  |
| H | -6.51017376 | 1.03516500   | 0.36970989  |
| H | -4.97944383 | -4.48393036  | -1.29829237 |
| H | -1.58097694 | -3.64971845  | -2.37072094 |
| H | -1.39087967 | -6.58179116  | -1.53783389 |
| H | -1.62077520 | -4.09686101  | 0.21126029  |
| H | -3.65044182 | -6.31412180  | -0.23669300 |
| H | 0.64139525  | -6.94535545  | -2.19838065 |
| H | 2.74873448  | -7.16351748  | -0.81524055 |
| H | 1.69793662  | -4.57004127  | 0.35719572  |
| H | 4.27104304  | -5.03249987  | -1.20028482 |
| H | 1.84538500  | -3.47489714  | -2.15443223 |
| H | 5.45090283  | -3.91128985  | 0.26779367  |
| H | 4.33698202  | -0.96743267  | -1.62310061 |
| H | 6.01976876  | 0.06732768   | 0.70894391  |
| H | 3.16739588  | -0.99538703  | 0.66446537  |
| H | 5.75127394  | -2.09569295  | 1.85323084  |
| H | 6.27525898  | 2.02894679   | 0.08797076  |
| H | 5.37954612  | 4.09200843   | 1.12306939  |
| H | 2.63689773  | 2.82750966   | 0.72780186  |
| H | 3.92197397  | 5.24748723   | -0.60621786 |
| H | 3.20404247  | 2.52307347   | -1.79639167 |
| H | 2.60766907  | 6.32433621   | -1.95048464 |
| H | 0.70830116  | 7.73316318   | -1.09512502 |
| H | -0.05878823 | 5.16628850   | 0.30961485  |
| H | -1.60665571 | 6.50232854   | -1.94033396 |

|   |             |             |             |
|---|-------------|-------------|-------------|
| H | -0.06771557 | 3.88807430  | -2.11621474 |
| H | -3.61719149 | 6.15188366  | -1.39594422 |
| H | -3.13841499 | 2.53654011  | -1.99066623 |
| H | -5.86002509 | 2.79671899  | -0.65461095 |
| H | -3.10030420 | 3.07871907  | 0.61956906  |
| H | -5.26704007 | 5.14994583  | 0.10455803  |
| H | -4.43179031 | 2.60931350  | -4.05101787 |
| H | -5.09934953 | 1.32968453  | -3.01169102 |
| H | -0.38200453 | 4.19130471  | -4.51510577 |
| H | -1.96596508 | 4.31914603  | -3.71343199 |
| H | 4.50359393  | 3.33517210  | -3.73572059 |
| H | 3.05479089  | 4.31427671  | -3.44183372 |
| H | 6.48134535  | -0.90728288 | -2.83722580 |
| H | 6.01343652  | 0.71067354  | -2.27010634 |
| H | 2.90626210  | -3.71099999 | -4.33433650 |
| H | 4.08872654  | -3.04845866 | -3.18655766 |
| H | -0.44861355 | -5.11793988 | -3.97206219 |
| H | -2.02444917 | -4.59595755 | -4.59972478 |
| H | -5.12227433 | -2.73050758 | -3.10276232 |
| H | -6.24961379 | -1.37926297 | -3.34019743 |
| H | -4.52572693 | 6.38858695  | 2.92102558  |
| H | -5.43282825 | 6.60655553  | 1.40987599  |
| H | 1.97848996  | 9.00198836  | 0.57206007  |
| H | 3.11845930  | 8.10270752  | -0.46690883 |
| H | 5.86309181  | 3.77859207  | 3.46160614  |
| H | 6.81537135  | 2.66908820  | 2.43711426  |
| H | 3.81627016  | -3.03535659 | 4.38297380  |
| H | 5.40798370  | -2.58036211 | 3.76216432  |
| H | 1.99603765  | -8.95855493 | 0.72876209  |
| H | 0.98501838  | -8.81308300 | -0.73564433 |
| H | -4.99755453 | -6.53845256 | 1.66672434  |
| H | -5.88794383 | -5.29806280 | 0.74016004  |
| H | -4.89966268 | -0.01987927 | 4.36906420  |
| H | -6.26199508 | -0.67335614 | 3.44359269  |
| H | -4.91125482 | -4.96714750 | 3.60132337  |
| H | -0.10814201 | -8.73000318 | 2.09527663  |
| H | 4.11432750  | -5.34914836 | 3.72731823  |
| H | 5.07678938  | 1.76341822  | 4.75439139  |
| H | 3.04259627  | 7.91183552  | 2.56355164  |
| H | -2.88077559 | 8.06456033  | 2.21098100  |
| H | -5.68908421 | 2.25422051  | 4.09336171  |
| H | -6.76949325 | -6.62142898 | 3.45350518  |
| H | -7.72710920 | -5.46554816 | 2.49924119  |
| H | -7.32926296 | -5.10287889 | 4.18296263  |
| H | -6.80474240 | 0.87030327  | 5.88516803  |
| H | -8.08427317 | 0.45827690  | 4.72206581  |
| H | -7.86803595 | 2.13605549  | 5.23898428  |
| H | -5.01708473 | 8.90530724  | 3.24903710  |
| H | -5.70494680 | 9.08032815  | 1.61893162  |
| H | -4.31713987 | 10.06441167 | 2.10080864  |
| H | 3.83353395  | 10.15525988 | 1.81115705  |
| H | 4.99297337  | 9.37714143  | 0.70928223  |
| H | 5.17562574  | 9.18869766  | 2.45743963  |
| H | 7.00007282  | 3.10788424  | 5.58130627  |
| H | 8.11255138  | 2.14284348  | 4.58413348  |
| H | 7.24711332  | 1.38233209  | 5.92377588  |
| H | 5.25071967  | -4.62872913 | 5.86635674  |
| H | 6.73939262  | -4.34691475 | 4.93751930  |

|   |             |              |             |
|---|-------------|--------------|-------------|
| H | 6.07989618  | -5.98281065  | 5.07415958  |
| H | 0.77811541  | -10.99557137 | 1.53319754  |
| H | -0.14660633 | -10.97785937 | 0.01358145  |
| H | -0.99767762 | -10.99018393 | 1.56198724  |
| H | -4.60716024 | 2.15644759   | 1.96557654  |
| H | -1.89384865 | 6.31885078   | 0.91213364  |
| H | -0.38426282 | 6.51477972   | -4.45537449 |
| H | 2.24530156  | 5.21320498   | 1.31319452  |
| H | 5.65352024  | 5.02287965   | -2.62639317 |
| H | 3.95619802  | 0.78358988   | 2.19227088  |
| H | 3.46011814  | -4.59702690  | 1.63707392  |
| H | 3.90970500  | -5.75261220  | -3.91947755 |
| H | -2.79889602 | -6.66219436  | -3.90796574 |
| H | -0.40237152 | -6.13937740  | 0.85877771  |
| H | -3.56043494 | -3.12333509  | 1.50290931  |
| H | -7.51689803 | -2.35791456  | -1.67552007 |
| H | -6.14536240 | 3.92435638   | -3.20236259 |
| H | 7.87270723  | -0.97036709  | -0.99635462 |
| H | -5.17470020 | -2.97890926  | 2.59495273  |
| H | -6.62644081 | 2.50838697   | 2.23573889  |
| H | -2.67073783 | 8.04191482   | 0.12053576  |
| H | 3.99160015  | 6.10018686   | 1.71376782  |
| H | 5.47745154  | 0.11309582   | 3.30153574  |
| H | 5.25936120  | -5.56831582  | 1.98574816  |
| H | -1.53769333 | -7.77086280  | 0.73461350  |

2-HP-B-CD:trans-(1S,4R)-SRT\_1\_MD E(Ha)= -7253.92994592

|    |               |               |               |
|----|---------------|---------------|---------------|
| C  | 0.6161671099  | 0.4057929131  | 3.9952712526  |
| C  | 0.4873167441  | 0.5645987061  | 2.4945994482  |
| C  | 0.8277820286  | 1.7675271348  | 1.8577778456  |
| C  | 1.2062701567  | 3.0167661362  | 2.6298877842  |
| C  | 1.6588292469  | 2.6847436341  | 4.0614209031  |
| C  | 0.6746006322  | 1.7361198080  | 4.7280500807  |
| C  | 0.0958440792  | -0.5433324630 | 1.7358454293  |
| C  | 0.0766738112  | -0.4847089226 | 0.3498832826  |
| C  | 0.4443072914  | 0.6944114727  | -0.2944306645 |
| C  | 0.7909406662  | 1.8105324512  | 0.4591473921  |
| C  | 0.0947528318  | 4.0550306312  | 2.6671528250  |
| C  | 0.4352161116  | 5.4066750246  | 2.7957784987  |
| C  | -0.5487673704 | 6.3777770506  | 2.9076705614  |
| C  | -1.8969230344 | 6.0226798283  | 2.9202311140  |
| C  | -2.2445886738 | 4.6746949206  | 2.8135957661  |
| C  | -1.2547218462 | 3.7043890463  | 2.6634136190  |
| Cl | -3.0957470758 | 7.2569880156  | 3.0774187171  |
| Cl | -3.8986055821 | 4.1668758553  | 2.9088711047  |
| N  | 1.8523447852  | -0.4384018262 | 4.2311325350  |
| C  | 2.3604419669  | -0.5156671749 | 5.6141690585  |
| C  | 5.4982095760  | -0.9947240737 | -0.7006760503 |
| C  | 5.1899965007  | -0.0470284705 | 0.4604996472  |
| C  | 4.0548973938  | -0.5870457772 | 1.3276047741  |
| C  | 4.2411025012  | -2.0394557401 | 1.7216438084  |
| C  | 4.5969411556  | -2.8675276695 | 0.4756816097  |
| O  | 5.7167034594  | -2.2977092811 | -0.1568224579 |
| O  | 3.4706888796  | -2.8968108203 | -0.3585445215 |
| C  | 3.4785566464  | -3.8935509623 | -1.3776616222 |
| C  | 2.9994085084  | -5.2280871427 | -0.8138703191 |
| C  | 2.6673723936  | -6.2094247975 | -1.9263139431 |
| C  | 1.6526476669  | -5.5675220865 | -2.8674657121 |
| O  | 2.2193649145  | -4.4193975268 | -3.4238897044 |
| C  | 2.5040342547  | -3.4021960118 | -2.4646976295 |
| O  | 0.5307351757  | -5.2575409229 | -2.0910003821 |
| C  | -0.7809509834 | -5.5970972900 | -2.5046708741 |
| C  | -1.4508363045 | -5.9718815473 | -1.1893789119 |
| C  | -2.9432074263 | -6.2120092118 | -1.3561928803 |
| C  | -3.5463547083 | -5.0106941874 | -2.1026552459 |
| O  | -2.8793288395 | -4.8125302966 | -3.3154531236 |
| C  | -1.5104424341 | -4.4245248725 | -3.1504354315 |
| O  | -3.3994749614 | -3.8350956779 | -1.3539721579 |
| C  | -4.3523931851 | -3.3930604190 | -0.3852951382 |
| C  | -3.4700873697 | -2.8050918105 | 0.7129687391  |
| C  | -4.1716240550 | -1.7642727201 | 1.5681802074  |
| C  | -4.8264698500 | -0.7463193165 | 0.6310816213  |
| O  | -5.8116844293 | -1.4171568238 | -0.1218675103 |
| C  | -5.3213545608 | -2.3905545132 | -1.0389691854 |
| O  | -3.6235652914 | -6.3117230529 | -0.1242044472 |
| C  | -3.5824328719 | -7.5789175276 | 0.5253792952  |
| C  | -3.0526417132 | -7.4121168126 | 1.9505645054  |
| O  | -1.8754775703 | -6.6253637997 | 1.9460229699  |
| O  | -0.7976720005 | -7.1082275348 | -0.6237824256 |
| O  | 2.1397127872  | -7.3762815195 | -1.3154411457 |
| C  | 2.3862507099  | -8.5863780074 | -2.0418417371 |
| C  | 1.1935498128  | -9.5227072364 | -1.9403668591 |
| O  | 0.0711764609  | -8.9440657109 | -2.5770065104 |

O 3.9779679811 -5.7718211774 0.0493957990  
O 3.0510439615 -2.4684261071 2.3452027417  
C 3.1776156261 -3.6123038966 3.1676662210  
C 1.7858584360 -4.1032613420 3.5388331994  
O 1.1087417184 -3.0411923480 4.2014136319  
O 3.9688687022 0.2124274567 2.5079447321  
O 4.6937510299 1.2366268784 0.0988115382  
C 5.4556416254 2.0789959042 -0.7219547031  
C 5.2675183852 3.5207463923 -0.2347374086  
C 3.8291990918 3.9513800657 -0.4876583073  
C 3.3898450300 3.6448863453 -1.9147758680  
C 3.6482612585 2.1791557020 -2.2504945302  
O 5.0536198718 1.9577366426 -2.0660169148  
O 5.6249916451 3.5380064684 1.1239530000  
C 6.0289904436 4.7879199169 1.6639355951  
C 5.1639959574 5.1607920480 2.8668170449  
O 3.7923525747 5.2095603860 2.5206639595  
O 3.6589114876 5.3351449260 -0.2232557505  
O 2.0103160834 3.9716460536 -1.9587339971  
C 1.5318854032 4.8535441317 -2.9421851670  
C 0.6251454838 5.8757542860 -2.2506481300  
C -0.5928065815 5.1637675420 -1.6992073483  
C -1.2757727178 4.3065482713 -2.7630055122  
C -0.2715629709 3.4072493918 -3.4855376640  
O 0.8452215838 4.1767732143 -3.9467966683  
O 1.3889037857 6.4919642438 -1.2357050606  
C 1.1551669688 7.8817301041 -1.0170194754  
C 2.2456583643 8.4053096953 -0.0954695925  
O 3.5193339332 8.2979337368 -0.6916326360  
O -1.5177840683 6.0854562551 -1.1526481397  
O -2.2064364287 3.5545939234 -2.0018876493  
C -3.4476396675 3.2209631350 -2.5514055307  
C -4.4870660478 3.2909025099 -1.4357357683  
C -4.2657670432 2.1937928804 -0.3958652130  
C -4.1858712494 0.8288114121 -1.0760170654  
C -3.0881030534 0.9124976033 -2.1489218425  
O -3.4486466337 1.9225227080 -3.0921482906  
O -4.4732325577 4.5330394953 -0.7646831418  
C -5.4084926518 5.5062814141 -1.2232352848  
C -4.7084012365 6.7805581197 -1.6709243092  
O -3.8230139313 6.4913796115 -2.7385496227  
O -5.3261161411 2.2056335261 0.5309675042  
O -3.8131796452 -0.1990102356 -0.1695273244  
O -3.2300228186 -1.1324278247 2.4058735345  
C -3.3594047640 -1.3146590931 3.7975334455  
C -2.8322161578 -2.6594583419 4.3147806756  
O -1.5799992771 -2.9634740339 3.7121809429  
O -2.9480085905 -3.8187176447 1.5560270719  
C -6.5791394207 -3.0647795128 -1.5690747263  
O -7.2799941280 -3.7260810163 -0.5463065649  
C -2.8323675767 -0.3664298281 -2.9193367182  
O -1.5460138743 -0.3149452252 -3.5067400793  
C -0.8233499863 2.6954813075 -4.7114203608  
O -0.1309018926 1.4864753102 -4.9648144105  
C 3.2576844243 1.7408925008 -3.6661857910  
O 2.0935103979 0.9359445474 -3.6191619349  
C 6.7656193567 -0.6877162311 -1.4838123060  
O 7.8783089607 -0.4554879013 -0.6539483325



|   |               |                |               |
|---|---------------|----------------|---------------|
| C | 3.0178577617  | -2.2214275792  | -3.2580115721 |
| O | 2.0205149733  | -1.7429369824  | -4.1254021520 |
| C | -0.9685773432 | -3.9661335011  | -4.5114266824 |
| O | -0.5455405582 | -2.6215052047  | -4.4958378175 |
| C | -4.0489287348 | -6.7487323128  | 2.8823480188  |
| C | 1.0124185580  | -4.6025573005  | 2.3303679311  |
| C | 5.3229335326  | 4.1825657325   | 4.0159166261  |
| C | 2.0185596229  | 9.8709640554   | 0.2222177469  |
| C | -5.7197808595 | 7.8210363373   | -2.1204658804 |
| C | 1.5023467600  | -10.8474074852 | -2.6147307007 |
| C | -2.6685914247 | -2.6360753514  | 5.8203853678  |
| H | -4.5948220657 | -5.2180992649  | -2.3430057805 |
| H | -3.1113527698 | -7.1102767548  | -1.9686245404 |
| H | -1.3208106533 | -5.1180776330  | -0.5104471373 |
| H | -0.7611511582 | -6.4606934767  | -3.1848175120 |
| H | 1.3881401296  | -6.2310388917  | -3.6988902107 |
| H | 3.5809161627  | -6.4452622008  | -2.4876055745 |
| H | 2.0762378305  | -5.0201282915  | -0.2579999950 |
| H | 4.4922797502  | -4.0046662877  | -1.7890405235 |
| H | 4.9071294964  | -3.8810689256  | 0.7402404026  |
| H | 5.0922681056  | -2.1123922117  | 2.4166624944  |
| H | 3.1180997184  | -0.5043753073  | 0.7589660379  |
| H | 6.0997270802  | 0.0639884509   | 1.0664422598  |
| H | 6.5165992795  | 1.8133991134   | -0.6805378751 |
| H | 5.9426878830  | 4.1555111657   | -0.8287808011 |
| H | 3.1951513292  | 3.3677424995   | 0.1924502186  |
| H | 3.9546846697  | 4.2800151494   | -2.6135526096 |
| H | 2.3664049295  | 5.3705663329   | -3.4304267341 |
| H | 0.3210690879  | 6.6196838652   | -2.9999026930 |
| H | -0.2498670040 | 4.4846564154   | -0.9074896376 |
| H | -1.8019233230 | 4.9525991711   | -3.4807004797 |
| H | -3.7060567557 | 3.9058179580   | -3.3667610628 |
| H | -5.4715456105 | 3.1141841482   | -1.8907608289 |
| H | -3.3040744403 | 2.3718965837   | 0.1103458700  |
| H | -5.1542684432 | 0.5955569175   | -1.5416048877 |
| H | -5.3567927637 | 0.0337842189   | 1.1825840713  |
| H | -4.9785662103 | -2.2276627142  | 2.1533473797  |
| H | -2.6499123534 | -2.2760513348  | 0.2118378063  |
| H | -4.9291599832 | -4.2313969287  | 0.0217149568  |
| H | -4.7952046806 | -1.9106232038  | -1.8724836507 |
| H | -2.1496485932 | 1.1846449513   | -1.6483925336 |
| H | 0.0675433463  | 2.6552593408   | -2.7622919101 |
| H | 3.0857800938  | 1.5456505046   | -1.5550291776 |
| H | 4.6476728868  | -1.0072405395  | -1.3884323288 |
| H | 1.5734852593  | -3.1030254044  | -1.9645738396 |
| H | -1.4476686567 | -3.5624082806  | -2.4766353179 |
| H | 0.1624797561  | -6.9436949415  | -0.7160210355 |
| H | -2.2019950757 | 5.5378900615   | -0.7318436105 |
| H | -2.8858279210 | -4.6768319591  | 1.1018828768  |
| H | 3.6888878504  | -6.6746767915  | 0.2359979751  |
| H | 4.0306220067  | 1.1286093429   | 2.1968339252  |
| H | 2.7468363674  | 5.5750410068   | -0.5015962831 |
| H | -5.3269848360 | 3.0953220566   | 0.9074282027  |
| H | -2.9355677058 | -8.2625471862  | -0.0350886217 |
| H | -4.5938803100 | -8.0042929562  | 0.5432790439  |
| H | -2.8388565985 | -8.4259502410  | 2.3296050940  |
| H | -4.3567440904 | -5.7748881842  | 2.4930073156  |
| H | -3.5907747713 | -6.5967352853  | 3.8631280517  |

|   |               |                |               |
|---|---------------|----------------|---------------|
| H | -4.9362948245 | -7.3754522827  | 3.0077869281  |
| H | -1.3112303880 | -6.9525514840  | 1.2266242268  |
| H | 3.7468129569  | -3.3629273416  | 4.0779648977  |
| H | 3.7045355652  | -4.4260896992  | 2.6514758288  |
| H | 1.9239519283  | -4.9355553646  | 4.2465657754  |
| H | 0.0070052391  | -4.9307715048  | 2.6099275625  |
| H | 1.5304205186  | -5.4632855139  | 1.8964431258  |
| H | 0.9524567689  | -3.8156865359  | 1.5728600904  |
| H | 0.1354422466  | -3.1606005269  | 4.1394402621  |
| H | 5.9644974129  | 5.5761004025   | 0.9043303565  |
| H | 7.0777264853  | 4.7146820131   | 1.9823142002  |
| H | 5.5086315147  | 6.1554169706   | 3.1981719319  |
| H | 5.1209831954  | 3.1622154037   | 3.6762243251  |
| H | 4.6222461203  | 4.4324152859   | 4.8170633057  |
| H | 6.3381346835  | 4.2181506699   | 4.4221056395  |
| H | 3.7256269743  | 5.4698811234   | 1.5837352322  |
| H | 0.1604086924  | 8.0250559336   | -0.5791357708 |
| H | 1.2098254606  | 8.4182777599   | -1.9747589196 |
| H | 2.2035034242  | 7.8205877605   | 0.8405134771  |
| H | 1.0511119015  | 10.0309835002  | 0.7066134306  |
| H | 2.0563008100  | 10.4654264743  | -0.6956954783 |
| H | 2.8074108453  | 10.2294459314  | 0.8867661456  |
| H | 3.7573225227  | 7.3644612739   | -0.7491150951 |
| H | -2.8844115226 | -1.2076253190  | -2.2196867636 |
| H | -3.6195211562 | -0.4904031082  | -3.6783256611 |
| H | -1.3100621879 | -1.2035351574  | -3.8572801088 |
| H | -1.8854355880 | 2.4803913975   | -4.5703345116 |
| H | -0.7032862328 | 3.3560797698   | -5.5766945993 |
| H | -0.6721464051 | 0.7861806870   | -4.5371279464 |
| H | -6.1052276805 | 5.7290449495   | -0.4047142388 |
| H | -5.9884737190 | 5.1087833265   | -2.0661292694 |
| H | -4.1435952218 | 7.1750698223   | -0.8121383691 |
| H | -6.2880559093 | 7.4523079412   | -2.9804602114 |
| H | -5.2026074610 | 8.7328752263   | -2.4271374654 |
| H | -6.4234917768 | 8.0736346916   | -1.3211428079 |
| H | -2.9252992080 | 6.5399814537   | -2.3765912433 |
| H | 3.0951958697  | 2.6048868639   | -4.3203295563 |
| H | 4.0975728360  | 1.1631658736   | -4.0716794275 |
| H | 1.3682883407  | 1.2984854980   | -4.1873192273 |
| H | 3.2948636839  | -9.0598001308  | -1.6462638359 |
| H | 2.5470891985  | -8.3609213916  | -3.1032077948 |
| H | 0.9818576711  | -9.6985088008  | -0.8737962372 |
| H | 2.3661302839  | -11.3405419601 | -2.1593562090 |
| H | 1.7078474400  | -10.6924768606 | -3.6785496889 |
| H | 0.6395775051  | -11.5118478158 | -2.5346568115 |
| H | -0.4363657297 | -8.4655943420  | -1.9051967931 |
| H | 6.9354884448  | -1.5353300415  | -2.1638356422 |
| H | 6.6212712257  | 0.2015526801   | -2.0994837204 |
| H | 8.0460403271  | -1.2733699283  | -0.1720814333 |
| H | -4.4021908325 | -1.1795164492  | 4.1246968588  |
| H | -2.7676445743 | -0.5059788735  | 4.2434911909  |
| H | -3.5417823385 | -3.4509450570  | 4.0384889198  |
| H | -2.3262155000 | -3.6080651305  | 6.1835692503  |
| H | -3.6161893562 | -2.4010948949  | 6.3144512188  |
| H | -1.9347996867 | -1.8789989898  | 6.1194143279  |
| H | -1.8130396133 | -3.3070850970  | 2.8240828584  |
| H | 3.3078025829  | -1.4406116477  | -2.5496218352 |
| H | 3.9095838887  | -2.5317091833  | -3.8239162481 |

|   |               |               |               |
|---|---------------|---------------|---------------|
| H | 2.0153535293  | -0.7642062761 | -4.0442370393 |
| H | -7.1971047905 | -2.2991074755 | -2.0603025800 |
| H | -6.3204564271 | -3.8130636481 | -2.3244438080 |
| H | -7.5144075317 | -3.0459504130 | 0.0965935696  |
| H | -0.1514227949 | -4.6117045997 | -4.8531853320 |
| H | -1.7873358767 | -4.0574736826 | -5.2327762435 |
| H | 0.4223043903  | -2.5352661601 | -4.3618261018 |
| H | 2.6151604883  | -0.1426682810 | 3.5839323802  |
| H | 1.6089625103  | -1.4222435509 | 3.9596273530  |
| H | 1.5530768084  | -0.8175667699 | 6.2830167884  |
| H | 2.7719718348  | 0.4433814436  | 5.9270398279  |
| H | 3.1445065320  | -1.2727703824 | 5.6434315526  |
| H | 1.4848711156  | 5.6906182719  | 2.8284906760  |
| H | -0.2843152357 | 7.4259751817  | 2.9999238018  |
| H | -1.5563185690 | 2.6679260617  | 2.5456683553  |
| H | -0.2036664995 | -1.4516570449 | 2.2474858117  |
| H | -0.2212836368 | -1.3528607674 | -0.2299899828 |
| H | 0.4725590746  | 0.7340687681  | -1.3800156858 |
| H | 1.0484710025  | 2.7348946750  | -0.0506188356 |
| H | 2.0619072613  | 3.4912668388  | 2.1360426560  |
| H | 1.7625609916  | 3.6103526423  | 4.6341630761  |
| H | 2.6603711431  | 2.2351542020  | 4.0275155580  |
| H | -0.3314949393 | 2.1695980503  | 4.6952747988  |
| H | 0.8988982243  | 1.5944386130  | 5.7895678588  |
| H | -0.2105245343 | -0.2033522473 | 4.3773367494  |

2-HP-B-CD:trans-(1S,4R)-SRT\_2\_MD E(Ha)= -7253.91927192

|    |               |               |               |
|----|---------------|---------------|---------------|
| C  | -0.6454234574 | -0.0187068503 | 3.7539859612  |
| C  | -0.3972225853 | -0.0152971273 | 2.2612921946  |
| C  | -0.3067942088 | -1.2063268710 | 1.5266972312  |
| C  | -0.3921431107 | -2.5761173589 | 2.1748841270  |
| C  | -0.9864025876 | -2.5119170024 | 3.5933793810  |
| C  | -0.3851884291 | -1.3708559124 | 4.3962078859  |
| C  | -0.3277095902 | 1.2168752430  | 1.5990241293  |
| C  | -0.1760334999 | 1.2760732095  | 0.2213085462  |
| C  | -0.0913800836 | 0.0972009547  | -0.5193628861 |
| C  | -0.1481393056 | -1.1267738763 | 0.1361732451  |
| C  | 0.9169373246  | -3.3494981740 | 2.1558595182  |
| C  | 0.8695559366  | -4.7222483985 | 1.8900121976  |
| C  | 2.0173181559  | -5.5009826262 | 1.9147232832  |
| C  | 3.2423119775  | -4.9247727147 | 2.2382890458  |
| C  | 3.3024929530  | -3.5554265577 | 2.5153215415  |
| C  | 2.1525817363  | -2.7679673601 | 2.4462627636  |
| Cl | 4.6594116046  | -5.9154644763 | 2.2644117951  |
| Cl | 4.8037974755  | -2.8151607861 | 2.9531455037  |
| N  | -2.0678963682 | 0.4729227847  | 3.9535823948  |
| C  | -2.6184341662 | 0.3673762066  | 5.3199988645  |
| C  | -5.5897269025 | 0.4787601006  | -1.0746257148 |
| C  | -5.1113549970 | -0.4237099238 | 0.0607044098  |
| C  | -4.2192568345 | 0.2946044189  | 1.0631398518  |
| C  | -4.7616512846 | 1.6480198473  | 1.4669837609  |
| C  | -5.1338496361 | 2.4243823742  | 0.1913544647  |
| O  | -6.1001080559 | 1.6947329168  | -0.5289753141 |
| O  | -3.9490179730 | 2.5964250858  | -0.5365809872 |
| C  | -3.9578431227 | 3.5120443857  | -1.6312698984 |
| C  | -3.8990879338 | 4.9449314447  | -1.1123696573 |
| C  | -3.3257743481 | 5.9309576888  | -2.1180660383 |
| C  | -2.0136193247 | 5.3795197563  | -2.6699307918 |
| O  | -2.2782576137 | 4.1720245927  | -3.3265569842 |
| C  | -2.6930668676 | 3.1420892878  | -2.4282531612 |
| O  | -1.1680421420 | 5.1629466035  | -1.5786831384 |
| C  | 0.1223753855  | 5.7462002419  | -1.4990107630 |
| C  | 0.2670782126  | 5.9406611133  | 0.0082801365  |
| C  | 1.6761756342  | 6.2732443350  | 0.4877198315  |
| C  | 2.7393434278  | 5.5161458544  | -0.3495274130 |
| O  | 2.4420629508  | 5.5714119615  | -1.7220608629 |
| C  | 1.2356992545  | 4.8516598752  | -2.0112200217 |
| O  | 2.7351434838  | 4.1818806257  | 0.0521988455  |
| C  | 3.8654274727  | 3.5743760740  | 0.6606388887  |
| C  | 3.2183542362  | 2.5063710266  | 1.5139753806  |
| C  | 4.2376373385  | 1.5576955840  | 2.1028651556  |
| C  | 5.0317900579  | 0.9725057355  | 0.9239926377  |
| O  | 5.6931584967  | 2.0329327080  | 0.2632351704  |
| C  | 4.8383711807  | 2.9849160465  | -0.3590085740 |
| O  | 1.8824039892  | 5.8599842707  | 1.8311657921  |
| C  | 1.1766739928  | 6.5746120650  | 2.8370120023  |
| C  | 1.2527087455  | 5.8275993594  | 4.1647958885  |
| O  | 0.5733257603  | 4.5719558986  | 4.0442049119  |
| O  | -0.6596332623 | 6.9275681925  | 0.4440811998  |
| O  | -3.1218249931 | 7.1351873529  | -1.3973014728 |
| C  | -3.1290273778 | 8.3177104001  | -2.1967201407 |
| C  | -2.2824730436 | 9.3901855391  | -1.5270619481 |
| O  | -0.9241553468 | 9.0039343274  | -1.5036842311 |

O -5.1877814313 5.3489889186 -0.6957950051  
O -3.7570690971 2.2925320675 2.2227344534  
C -4.2092750507 3.2384923576 3.1686122106  
C -3.0413202455 4.1280357137 3.5593101489  
O -2.0133200970 3.2959867146 4.0850753304  
O -4.0540785941 -0.5299353076 2.2164670168  
O -4.2585851286 -1.4621401525 -0.3809356019  
C -4.7866982871 -2.5910877869 -1.0139773431  
C -4.2585060248 -3.8074572735 -0.2393361226  
C -2.7657733569 -3.9495423370 -0.4796281690  
C -2.4461583005 -3.8822301340 -1.9687764469  
C -2.9645735413 -2.5518364637 -2.5108622724  
O -4.3912937230 -2.6067045269 -2.3607065553  
O -4.5529450225 -3.5664286176 1.1225794424  
C -4.8994641097 -4.7094726116 1.8818562544  
C -5.2396452783 -4.2855709955 3.3038156554  
O -4.1112857173 -3.7354116802 3.9712499488  
O -2.2715794407 -5.1398162475 0.1040882294  
O -1.0414287019 -4.0290039319 -2.0550548729  
C -0.5131789042 -4.8861680601 -3.0387513333  
C 0.4737798084 -5.8368237923 -2.3521758512  
C 1.6242395632 -5.0231846324 -1.8040867854  
C 2.2200743906 -4.1065230557 -2.8749780375  
C 1.1475848512 -3.2892655414 -3.5989120833  
O 0.1079869262 -4.1649634317 -4.0534506732  
O -0.1960989219 -6.5301926488 -1.3169324844  
C -0.5684171427 -7.8653762935 -1.6614895175  
C -1.6811996349 -8.3524896266 -0.7473975706  
O -2.8796078444 -7.6499869745 -0.9885433171  
O 2.6338000511 -5.8670353491 -1.2826562309  
O 3.1121511969 -3.3109763903 -2.1110370095  
C 4.2129857943 -2.7212920460 -2.7372803377  
C 5.3816344925 -2.7240473907 -1.7564297190  
C 5.1039310512 -1.8149202238 -0.5651915302  
C 4.6414893851 -0.4276991818 -1.0063502668  
C 3.5049905796 -0.5770624970 -2.0338490330  
O 3.9457326607 -1.3931223435 -3.1152845643  
O 5.6608318593 -4.0096414744 -1.2476018546  
C 6.5411344294 -4.8053808792 -2.0339746707  
C 5.9401208736 -6.1734421160 -2.3175992343  
O 4.7826289436 -6.0312050667 -3.1231313991  
O 6.2754313000 -1.6713288332 0.2060073210  
O 4.1145346276 0.3049801026 0.0930607324  
O 3.5689818610 0.5731842248 2.8640499276  
C 3.8417053434 0.5369432146 4.2527166728  
C 3.2246545408 1.6853560704 5.0599671372  
O 1.8552812672 1.8699458182 4.7261601930  
O 2.4853216595 3.1310356952 2.5431556275  
C 5.7052498400 4.0378265032 -1.0236261922  
O 6.1698667296 4.9526935920 -0.0527269648  
C 3.0287412888 0.7316025269 -2.6253883802  
O 1.8478229543 0.5416925337 -3.3803783879  
C 1.6191113263 -2.5495877804 -4.8462929990  
O 0.8379800438 -1.3967653493 -5.0960592744  
C -2.6063148824 -2.1994705546 -3.9562194125  
O -1.5986890207 -1.2049830729 -3.9575193817  
C -6.7114659656 -0.1137711004 -1.9100612472  
O -7.7739043157 -0.6079475635 -1.1293667592

|   |               |               |               |
|---|---------------|---------------|---------------|
| C | -2.8363687047 | 1.8874759103  | -3.2604766258 |
| O | -1.5866755921 | 1.5672668989  | -3.8117008346 |
| C | 1.2005370525  | 4.4364353197  | -3.4859052476 |
| O | 0.7809649196  | 3.0969740871  | -3.6407069422 |
| C | 2.6755255676  | 5.6429765855  | 4.6634378409  |
| C | -2.5403732690 | 4.9489889263  | 2.3856941840  |
| C | -6.3415126946 | -3.2461261174 | 3.3757477318  |
| C | -1.9535365843 | -9.8264037772 | -0.9891747648 |
| C | 6.9414617803  | -7.0632464742 | -3.0351571522 |
| C | -2.3868681329 | 10.7017953398 | -2.2834394077 |
| C | 3.3269799747  | 1.4093171460  | 6.5461384884  |
| H | 3.7266284443  | 5.9702802144  | -0.2161752070 |
| H | 1.8512883687  | 7.3540045887  | 0.3829303729  |
| H | 0.0069797090  | 4.9706898447  | 0.4597912432  |
| H | 0.1428323282  | 6.7177036156  | -2.0114045345 |
| H | -1.5563357241 | 6.0509382770  | -3.4053896029 |
| H | -4.0344955895 | 6.0798368102  | -2.9438080920 |
| H | -3.2097005268 | 4.9288719613  | -0.2593678620 |
| H | -4.8664844715 | 3.3798647550  | -2.2359655167 |
| H | -5.6009785409 | 3.3882116944  | 0.4139181461  |
| H | -5.6763337977 | 1.5151074310  | 2.0626298251  |
| H | -3.2428491112 | 0.4561532793  | 0.5883583468  |
| H | -5.9886381721 | -0.8343164126 | 0.5802652450  |
| H | -5.8816943091 | -2.5802284069 | -1.0019720534 |
| H | -4.7768341994 | -4.7090732278 | -0.5966083287 |
| H | -2.2811929989 | -3.0834563744 | -0.0084198057 |
| H | -2.9474416073 | -4.7066130329 | -2.4977036675 |
| H | -1.3182871077 | -5.4574602355 | -3.5165372679 |
| H | 0.8529342616  | -6.5420792842 | -3.1032811312 |
| H | 1.2352543046  | -4.3826693905 | -1.0004190130 |
| H | 2.7863100753  | -4.7123037459 | -3.5969929899 |
| H | 4.4674954127  | -3.2647545763 | -3.6546406134 |
| H | 6.2558475023  | -2.3185789673 | -2.2862106320 |
| H | 4.2923819274  | -2.2551265329 | 0.0333864673  |
| H | 5.4890358534  | 0.1105957506  | -1.4546173639 |
| H | 5.8235206427  | 0.2976292223  | 1.2548390809  |
| H | 4.9581998049  | 2.1099531584  | 2.7217799738  |
| H | 2.5458370927  | 1.9124231703  | 0.8809751693  |
| H | 4.3957211781  | 4.2876810111  | 1.3023712528  |
| H | 4.2520763500  | 2.5047031830  | -1.1492894029 |
| H | 2.6536873336  | -1.0550204872 | -1.5319236465 |
| H | 0.7320519484  | -2.5566092647 | -2.8947799196 |
| H | -2.5615414752 | -1.7337756215 | -1.9018837616 |
| H | -4.7401646293 | 0.6911489067  | -1.7284983920 |
| H | -1.8983416352 | 2.9664067982  | -1.6946167524 |
| H | 1.2367492111  | 3.9124188077  | -1.4501220273 |
| H | -1.5092117432 | 6.6982846010  | 0.0255681920  |
| H | 3.2909935724  | -5.2609599245 | -0.9029554216 |
| H | 2.0328900868  | 3.9166118754  | 2.1828913272  |
| H | -5.1030650233 | 6.2755500260  | -0.4365999849 |
| H | -3.9876763187 | -1.4493135149 | 1.9007118074  |
| H | -1.4190736497 | -5.3422077350 | -0.3328818159 |
| H | 6.4920960550  | -2.5537093532 | 0.5316289743  |
| H | 0.1308215210  | 6.7092204231  | 2.5469537064  |
| H | 1.6169728028  | 7.5744451900  | 2.9694319072  |
| H | 0.7015734061  | 6.4514060957  | 4.8855328264  |
| H | 2.6787861821  | 5.1446706029  | 5.6385445504  |
| H | 3.1644958648  | 6.6134062359  | 4.7858389539  |

|   |               |                |               |
|---|---------------|----------------|---------------|
| H | 3.2566230551  | 5.0433758638   | 3.9593822586  |
| H | 1.0991057661  | 3.8828237041   | 4.4844741440  |
| H | -4.6153950591 | 2.7278892819   | 4.0563292032  |
| H | -5.0069330356 | 3.8735822465   | 2.7583917629  |
| H | -3.4070507080 | 4.8022144092   | 4.3500947376  |
| H | -2.2279582471 | 4.2835771755   | 1.5767331514  |
| H | -1.6935932253 | 5.5741156387   | 2.6754129998  |
| H | -3.3332426887 | 5.6073332496   | 2.0162392229  |
| H | -1.1898145662 | 3.8190793304   | 4.1413339401  |
| H | -4.0698388426 | -5.4309347753  | 1.8899124659  |
| H | -5.7732016306 | -5.2110463380  | 1.4375477529  |
| H | -5.5765499559 | -5.1982942376  | 3.8220989174  |
| H | -6.0112494824 | -2.3077873004  | 2.9240490852  |
| H | -6.5995276352 | -3.0518122695  | 4.4194562691  |
| H | -7.2381747334 | -3.5926797266  | 2.8546878987  |
| H | -3.4482505221 | -4.4298518627  | 4.0468139613  |
| H | 0.3159120310  | -8.5126775888  | -1.5826196177 |
| H | -0.9417489630 | -7.9028193534  | -2.6944542999 |
| H | -1.3477051159 | -8.2110977994  | 0.2948452078  |
| H | -2.7614173656 | -10.1608845620 | -0.3350911920 |
| H | -1.0685106939 | -10.4390499408 | -0.7954541502 |
| H | -2.2730062522 | -9.9859171541  | -2.0238580383 |
| H | -2.8145180793 | -6.7841823487  | -0.5553362332 |
| H | 2.8245222162  | 1.4149088550   | -1.7944971254 |
| H | 3.8328765373  | 1.1559094579   | -3.2465244175 |
| H | 1.4795144700  | 1.4311476038   | -3.5599042714 |
| H | 2.6680839456  | -2.2623581288  | -4.7531818263 |
| H | 1.5124285568  | -3.2244255281  | -5.7015022654 |
| H | 1.2444517034  | -0.6734207176  | -4.5741140955 |
| H | 7.4914012404  | -4.9179595108  | -1.4942612090 |
| H | 6.7527320491  | -4.3141300649  | -2.9927812664 |
| H | 5.6748670636  | -6.6287750356  | -1.3514435291 |
| H | 7.2177575090  | -6.6229688769  | -3.9986739720 |
| H | 6.4958889309  | -8.0411959232  | -3.2298578349 |
| H | 7.8511908213  | -7.2063626575  | -2.4440701902 |
| H | 4.0065309356  | -6.2155100837  | -2.5718360937 |
| H | -2.2721975758 | -3.0784783668  | -4.5174377091 |
| H | -3.5170687264 | -1.8186586733  | -4.4358371479 |
| H | -0.8049956019 | -1.4691655779  | -4.4762244614 |
| H | -4.1651331294 | 8.6583871664   | -2.3327394875 |
| H | -2.6995644780 | 8.1128782175   | -3.1862615817 |
| H | -2.6616546501 | 9.5304407066   | -0.5020904427 |
| H | -2.0186723805 | 10.5808142997  | -3.3071619394 |
| H | -1.7697404382 | 11.4573792502  | -1.7931465386 |
| H | -3.4183597724 | 11.0637032307  | -2.3227614958 |
| H | -0.7652068908 | 8.4582462162   | -0.7178071129 |
| H | -7.0467579953 | 0.6616885160   | -2.6135794519 |
| H | -6.3238687942 | -0.9484560909  | -2.5006321532 |
| H | -8.1587969348 | 0.1467096428   | -0.6694432171 |
| H | 4.9257639636  | 0.5061912850   | 4.4409558079  |
| H | 3.4213298677  | -0.4144480553  | 4.5973298638  |
| H | 3.7719559910  | 2.6114924028   | 4.8239985561  |
| H | 2.7642843540  | 0.5061737333   | 6.8034807483  |
| H | 2.9113304283  | 2.2433979851   | 7.1172853857  |
| H | 4.3675779054  | 1.2680691877   | 6.8519554500  |
| H | 1.8865587546  | 2.1238240096   | 3.7785690146  |
| H | -3.1824345171 | 1.0875819494   | -2.5957919303 |
| H | -3.5971616373 | 2.0507920525   | -4.0410406208 |

|   |               |               |               |
|---|---------------|---------------|---------------|
| H | -1.5799618926 | 0.6038381304  | -3.9841575468 |
| H | 6.5309278549  | 3.5178506486  | -1.5275049321 |
| H | 5.0981915082  | 4.5444992457  | -1.7896494061 |
| H | 6.8808541699  | 5.4708628817  | -0.4402040888 |
| H | 0.5861594495  | 5.1126992472  | -4.0933262791 |
| H | 2.2260384652  | 4.5054955074  | -3.8626886742 |
| H | -0.1836127890 | 3.0026031247  | -3.7260373035 |
| H | -2.7230663004 | 0.0173105248  | 3.2799964138  |
| H | -2.0731039167 | 1.4827325927  | 3.7092301415  |
| H | -3.5547052347 | 0.9243385260  | 5.3547334826  |
| H | -1.9132267745 | 0.8032052666  | 6.0288231584  |
| H | -2.8141529480 | -0.6760188808 | 5.5657847829  |
| H | -0.0812902362 | -5.1867513129 | 1.6426005205  |
| H | 1.9759580085  | -6.5565278180 | 1.6717052581  |
| H | 2.2502996478  | -1.6952703628 | 2.5913671422  |
| H | -0.3999039404 | 2.1375306525  | 2.1738621242  |
| H | -0.1268321138 | 2.2390308646  | -0.2776220954 |
| H | 0.0271620512  | 0.1410581133  | -1.5981931543 |
| H | -0.0840546435 | -2.0479175042 | -0.4411293701 |
| H | -1.0878922630 | -3.1736329943 | 1.5763183662  |
| H | -0.8041526778 | -3.4649798896 | 4.1006283627  |
| H | -2.0758881937 | -2.4034991904 | 3.5207589835  |
| H | 0.7036946945  | -1.4847485095 | 4.4440544392  |
| H | -0.7278507541 | -1.3829313865 | 5.4350259988  |
| H | -0.0104359098 | 0.7282037750  | 4.2442134254  |



2-HP-B-CD:trans-(1S,4R)-SRT\_3\_MD E(Ha)= -7253.91675574

|    |               |               |               |
|----|---------------|---------------|---------------|
| C  | -1.0005833157 | -0.3193929450 | 4.1142066814  |
| C  | -0.7188515147 | -0.3050284756 | 2.6293290965  |
| C  | -0.5531075155 | -1.4980501711 | 1.9116004120  |
| C  | -0.5385678918 | -2.8648032986 | 2.5722614787  |
| C  | -1.0352002864 | -2.8284044500 | 4.0284693012  |
| C  | -0.5230456033 | -1.6034195719 | 4.7709100367  |
| C  | -0.6547866532 | 0.9240029518  | 1.9601574127  |
| C  | -0.4512944731 | 0.9820519195  | 0.5881061728  |
| C  | -0.3143831708 | -0.2024155377 | -0.1362092656 |
| C  | -0.3565674840 | -1.4215230970 | 0.5268623524  |
| C  | 0.8148950036  | -3.5462400050 | 2.4355746282  |
| C  | 0.8490728862  | -4.9080742036 | 2.1231032037  |
| C  | 2.0515840851  | -5.5831502295 | 1.9723256202  |
| C  | 3.2551629161  | -4.9077628656 | 2.1510597410  |
| C  | 3.2348861788  | -3.5487928686 | 2.4808287559  |
| C  | 2.0237197629  | -2.8714160967 | 2.6126844172  |
| Cl | 4.7424015593  | -5.7623712233 | 1.9334144214  |
| Cl | 4.7117610961  | -2.6725952595 | 2.7074332997  |
| N  | -2.4931202697 | -0.0867646668 | 4.2939832726  |
| C  | -3.0776456992 | -0.4294491942 | 5.6106792508  |
| C  | -4.7455111065 | 0.0673632026  | -1.2735992942 |
| C  | -4.7879584544 | -0.8651174686 | -0.0711771550 |
| C  | -4.1060740533 | -0.1888336906 | 1.1070820961  |
| C  | -4.8074420618 | 1.1133234191  | 1.4262941495  |
| C  | -4.9293602991 | 1.9761335086  | 0.1506340842  |
| O  | -5.4775482171 | 1.2404408088  | -0.9094613843 |
| O  | -3.6523815845 | 2.4863602871  | -0.1554755162 |
| C  | -3.6773343124 | 3.6246929638  | -1.0096480880 |
| C  | -3.8201741838 | 4.9103759236  | -0.1997736561 |
| C  | -3.7054667493 | 6.1231779736  | -1.1127201363 |
| C  | -2.3647680234 | 6.0891094042  | -1.8486650421 |
| O  | -2.3041039482 | 4.8719085612  | -2.5689045687 |
| C  | -2.3363518249 | 3.7050732421  | -1.7486961934 |
| O  | -1.3382648733 | 6.1909581319  | -0.9197929735 |
| C  | -0.0742937003 | 6.7079066284  | -1.3291993611 |
| C  | 0.6535138766  | 6.8661323856  | 0.0014605786  |
| C  | 2.1508712711  | 7.0607915543  | -0.1385456134 |
| C  | 2.7305266485  | 6.0073288499  | -1.0824475605 |
| O  | 2.0781664176  | 6.0896712159  | -2.3188677200 |
| C  | 0.6847217305  | 5.7628385079  | -2.2754858020 |
| O  | 2.5387720481  | 4.7397717327  | -0.5138274313 |
| C  | 3.6902841195  | 3.9506621745  | -0.2348850342 |
| C  | 3.2328718884  | 3.0303382616  | 0.8869458184  |
| C  | 4.2984034063  | 1.9985754296  | 1.2131850063  |
| C  | 4.7487118015  | 1.3007346158  | -0.0763968145 |
| O  | 5.1802491479  | 2.2530756861  | -1.0248383003 |
| C  | 4.1771400342  | 3.1722447927  | -1.4492428165 |
| O  | 2.6906736718  | 6.9425469813  | 1.1652488837  |
| C  | 3.9371271934  | 7.6114110030  | 1.3505222512  |
| C  | 4.6455883719  | 7.0266654338  | 2.5630116093  |
| O  | 5.0595752698  | 5.6993463163  | 2.3206800070  |
| O  | 0.0597765259  | 7.9466903483  | 0.6875387869  |
| O  | -3.8960245621 | 7.2489594678  | -0.2920428503 |
| C  | -4.2391498111 | 8.4564245362  | -0.9661478445 |
| C  | -3.2554032091 | 9.5535491085  | -0.5893192826 |
| O  | -1.9448062025 | 9.1739857960  | -0.9511257197 |

O -5.0537206976 4.9475113904 0.4868950109  
O -4.1004221063 1.7600951849 2.4620166984  
C -4.8623879824 2.7173491706 3.1731440100  
C -3.9308845678 3.5068671451 4.0704614693  
O -3.2626782047 2.5658044988 4.9155677628  
O -4.1238499977 -1.0567055849 2.2406158026  
O -4.0795832231 -2.0784474433 -0.2594119234  
C -4.8120888992 -3.2349383561 -0.5657425956  
C -4.2907282552 -4.3567049165 0.3421016001  
C -2.8615879012 -4.6560406481 -0.0576538324  
C -2.7268969946 -4.9128109135 -1.5570507632  
C -3.3187361250 -3.7421829494 -2.3410483920  
O -4.6811711417 -3.5774344739 -1.9147700637  
O -4.4183352998 -3.8666050938 1.6614072979  
C -4.3449286398 -4.8117440778 2.7236752238  
C -5.1489602854 -4.2647098448 3.8968889835  
O -4.6577967215 -2.9908889529 4.2971800464  
O -2.3163979269 -5.7434233473 0.6678755460  
O -1.3216182216 -5.0100030465 -1.6960405555  
C -0.7343139644 -5.8558803687 -2.6441725659  
C 0.4808898355 -6.4922868296 -1.9518394461  
C 1.4847722142 -5.4012643303 -1.6361801148  
C 1.7580393230 -4.4986238674 -2.8437442527  
C 0.4534846994 -3.9960367470 -3.4605656605  
O -0.3470726362 -5.1393240802 -3.7796153927  
O 0.0606719613 -7.1228360134 -0.7573109431  
C -0.1688843245 -8.5249116247 -0.8745099229  
C -1.3490472532 -8.9353455590 -0.0062867087  
O -2.5356166879 -8.3290001924 -0.4840771795  
O 2.6926684652 -5.9625246127 -1.1641053822  
C 2.5263421676 -3.4513442711 -2.2754571765  
O 3.4998886081 -2.8212643268 -3.0543040304  
C 4.7616021550 -2.6723289641 -2.2057141911  
C 4.5497926352 -1.6834111341 -1.0630867148  
C 4.0069857092 -0.3634024611 -1.6088362046  
C 2.7278456125 -0.6917050834 -2.3950667278  
O 3.0682862426 -1.5522410653 -3.4802148519  
O 5.1567600892 -3.9100329018 -1.6535107757  
C 6.1495151023 -4.6169115783 -2.3953320393  
C 5.8298889395 -6.1032609982 -2.4344965757  
O 4.6359287284 -6.3218730656 -3.1611015334  
O 5.7686323473 -1.4664228655 -0.3927321133  
O 3.6738133417 0.5382088921 -0.5613520050  
O 3.8384095966 1.0212756558 2.1162567918  
C 4.2428165307 1.1085106669 3.4748347010  
C 3.0498920099 1.4901346672 4.3432773851  
O 1.9383637914 0.6799633685 3.9778572015  
O 2.9362832712 3.8144015985 2.0352318034  
C 4.8325748910 4.0262222813 -2.5208326816  
O 5.8285545535 4.8792997617 -2.0105691555  
C 1.9964876489 0.5028600257 -2.9635313462  
O 0.6889570799 0.1325654926 -3.3640924561  
C 0.5476756281 -3.1404448081 -4.7218282150  
O -0.4452417832 -2.1314025638 -4.7363227799  
C -3.3218335098 -3.8634513013 -3.8611677431  
O -3.2770411899 -2.6022303345 -4.4796801121  
C -5.3428727395 -0.5147301225 -2.5486834003  
O -6.4651100360 -1.3367310973 -2.3054466700

|   |               |                |               |
|---|---------------|----------------|---------------|
| C | -2.0213217274 | 2.5324789242   | -2.6567375545 |
| O | -0.6508061455 | 2.4968272476   | -3.0134897888 |
| C | 0.2513653459  | 5.8122043612   | -3.7338900432 |
| O | 0.5543598442  | 4.5986480560   | -4.4051645821 |
| C | 5.8847290377  | 7.8366773696   | 2.8969558245  |
| C | -2.9409751372 | 4.3494687086   | 3.2878478235  |
| C | -6.6407993498 | -4.2043511890  | 3.6099711531  |
| C | -1.5333013708 | -10.4422727744 | -0.0282686719 |
| C | 6.9562117080  | -6.8740514084  | -3.1011146958 |
| C | -3.5915421546 | 10.8509691495  | -1.3005788670 |
| C | 3.3303112724  | 1.2780787779   | 5.8142384750  |
| H | 3.7923885494  | 6.1850044540   | -1.2835511811 |
| H | 2.3479936212  | 8.0589941303   | -0.5549977114 |
| H | 0.4922694569  | 5.9277060906   | 0.5535919996  |
| H | -0.2122184713 | 7.6962971384   | -1.7919078116 |
| H | -2.3031291725 | 6.8915655032   | -2.5936698631 |
| H | -4.4965381425 | 6.0659693144   | -1.8767131739 |
| H | -2.9875461987 | 4.9463881984   | 0.5169091769  |
| H | -4.5007429939 | 3.5388468899   | -1.7329439304 |
| H | -5.6312262316 | 2.7976094691   | 0.3106347486  |
| H | -5.8319234801 | 0.8797388689   | 1.7574193357  |
| H | -3.0651934656 | 0.0250773915   | 0.8314044219  |
| H | -5.8399051676 | -1.0750836336  | 0.1608859269  |
| H | -5.8804399831 | -3.0724669740  | -0.3915297877 |
| H | -4.9232466276 | -5.2457234648  | 0.2017813938  |
| H | -2.2804123862 | -3.7459100295  | 0.1517574354  |
| H | -3.2105047274 | -5.8621355465  | -1.8318018467 |
| H | -1.4430002846 | -6.6238621877  | -2.9760458715 |
| H | 0.9394379343  | -7.2187978912  | -2.6352649172 |
| H | 1.0488803108  | -4.7692921211  | -0.8491927457 |
| H | 2.3532745282  | -5.0477785216  | -3.5871932891 |
| H | 3.7037126223  | -3.3997402350  | -3.9626570525 |
| H | 5.5575270595  | -2.2657136783  | -2.8446383329 |
| H | 3.7922061956  | -2.0858980443  | -0.3738097449 |
| H | 4.7434606736  | 0.0995878395   | -2.2809036655 |
| H | 5.6154155353  | 0.6652069745   | 0.1145421266  |
| H | 5.1782861395  | 2.5169159433   | 1.6214882320  |
| H | 2.3304830290  | 2.4916651480   | 0.5626594850  |
| H | 4.5018345233  | 4.5881369920   | 0.1400808372  |
| H | 3.3253298879  | 2.6430559244   | -1.8939047429 |
| H | 2.0388590813  | -1.2117328274  | -1.7178683721 |
| H | -0.0614974429 | -3.3922996341  | -2.7035589493 |
| H | -2.7452281307 | -2.8426231695  | -2.0834201140 |
| H | -3.7011013593 | 0.3382773035   | -1.4803588297 |
| H | -1.5411972249 | 3.7669511727   | -0.9922625730 |
| H | 0.5611808786  | 4.7379883267   | -1.9037360951 |
| H | 0.5510970529  | 8.0600522945   | 1.5096031313  |
| H | 3.2771517823  | -5.2082102927  | -0.9764827978 |
| H | 2.3965973079  | 4.5518137169   | 1.7082100367  |
| H | -5.1866419432 | 5.8828527071   | 0.7012968448  |
| H | -3.9441387255 | -1.9568302121  | 1.8981222027  |
| H | -1.4627447712 | -5.9363568561  | 0.2304632516  |
| H | 6.0075170740  | -2.3092889919  | 0.0118266454  |
| H | 3.7581054668  | 8.6886718178   | 1.4803237511  |
| H | 4.5870295259  | 7.4691349545   | 0.4766711178  |
| H | 3.9449612063  | 7.0656348316   | 3.4137700060  |
| H | 6.3905841427  | 7.3930989441   | 3.7569517950  |
| H | 5.6358463539  | 8.8749059094   | 3.1341752936  |

|   |               |                |               |
|---|---------------|----------------|---------------|
| H | 6.5828582164  | 7.8264290400   | 2.0540128610  |
| H | 4.2955551840  | 5.1013665835   | 2.3661440591  |
| H | -5.6312663293 | 2.2115789453   | 3.7769050183  |
| H | -5.3512737613 | 3.4236870404   | 2.4902030312  |
| H | -4.5650986397 | 4.1582282308   | 4.6902071762  |
| H | -2.2313845450 | 4.8493087694   | 3.9561889306  |
| H | -3.4721045832 | 5.1210973649   | 2.7249291784  |
| H | -2.3916316552 | 3.7258034068   | 2.5779604766  |
| H | -2.6932151078 | 3.0609158755   | 5.5138510103  |
| H | -3.2989313013 | -4.9697049234  | 3.0092900609  |
| H | -4.7574518915 | -5.7776473436  | 2.4036680550  |
| H | -4.9670219341 | -4.9311045822  | 4.7486415807  |
| H | -6.8365746777 | -3.5771631722  | 2.7334871146  |
| H | -7.1709699420 | -3.7819815552  | 4.4667378879  |
| H | -7.0472209555 | -5.1999678017  | 3.4092442803  |
| H | -4.9800867001 | -2.3421977658  | 3.6559413061  |
| H | 0.7414756692  | -9.0660529237  | -0.5824386213 |
| H | -0.4108117747 | -8.7866603335  | -1.9131878972 |
| H | -1.1422023874 | -8.6090802852  | 1.0254725785  |
| H | -1.7551560063 | -10.7803553912 | -1.0454235993 |
| H | -2.3757327489 | -10.7217202410 | 0.6079321271  |
| H | -0.6391015821 | -10.9636689209 | 0.3258279039  |
| H | -2.6846362623 | -7.5241667492  | 0.0325604386  |
| H | 1.9426696781  | 1.2617873404   | -2.1761511606 |
| H | 2.5707291423  | 0.9081573512   | -3.8107323620 |
| H | 0.1525485187  | 0.9536157441   | -3.3842246148 |
| H | 1.5364056419  | -2.6810626582  | -4.8052725611 |
| H | 0.3905470268  | -3.7870488776  | -5.5908420439 |
| H | -0.0638088619 | -1.3466867780  | -4.3012438175 |
| H | 7.1322663967  | -4.4433575301  | -1.9351861934 |
| H | 6.1850518739  | -4.2512582812  | -3.4298142177 |
| H | 5.7145668276  | -6.4515546739  | -1.3963278003 |
| H | 6.7158664948  | -7.9392304868  | -3.1158968612 |
| H | 7.9067261056  | -6.7372094729  | -2.5767197802 |
| H | 7.0782362253  | -6.5442906803  | -4.1378763089 |
| H | 3.9150227727  | -6.4257575158  | -2.5193386919 |
| H | -2.4793886147 | -4.4874362549  | -4.1774590808 |
| H | -4.2491916862 | -4.3654807813  | -4.1619742632 |
| H | -2.3369062464 | -2.3826932298  | -4.6184934666 |
| H | -5.2638172326 | 8.7401020417   | -0.6901439306 |
| H | -4.2094382841 | 8.3118279169   | -2.0538186787 |
| H | -3.3197651302 | 9.7080299935   | 0.4990171179  |
| H | -4.6078954746 | 11.1837761999  | -1.0698172600 |
| H | -3.5047098661 | 10.7227106835  | -2.3843370941 |
| H | -2.8918474268 | 11.6328171300  | -0.9980538973 |
| H | -1.5594257917 | 8.6504433213   | -0.2332605827 |
| H | -5.6431419818 | 0.3341262558   | -3.1766333936 |
| H | -4.5632437176 | -1.0663309411  | -3.0867285732 |
| H | -6.1913598907 | -2.2288206205  | -2.5519373688 |
| H | 5.0610186740  | 1.8284214263   | 3.6030891887  |
| H | 4.6010975760  | 0.1137258929   | 3.7651257501  |
| H | 2.8079429988  | 2.5446220806   | 4.1481208571  |
| H | 3.5701121131  | 0.2281652213   | 6.0100290288  |
| H | 2.4553359736  | 1.5457615896   | 6.4129689326  |
| H | 4.1697934007  | 1.8963606308   | 6.1458970621  |
| H | 1.9108278117  | 0.7147129168   | 3.0102348447  |
| H | -2.2234579847 | 1.6072542111   | -2.1140903261 |
| H | -2.6685296563 | 2.5674084557   | -3.5435900938 |

|   |               |               |               |
|---|---------------|---------------|---------------|
| H | -0.4121090231 | 3.2562698417  | -3.5834071393 |
| H | 5.2322046258  | 3.3491239095  | -3.2899959911 |
| H | 4.0808916137  | 4.6642397296  | -2.9952091331 |
| H | 6.4885169604  | 4.3162720935  | -1.5879208224 |
| H | -0.8237705785 | 5.9315062305  | -3.8341685043 |
| H | 0.7482546546  | 6.6638464574  | -4.2158494584 |
| H | 1.5124576786  | 4.4905970335  | -4.3873790669 |
| H | -3.0318268405 | -0.5657720227 | 3.5378308827  |
| H | -2.6877776459 | 0.9181221332  | 4.1436137261  |
| H | -4.0592006985 | 0.0405196909  | 5.6680861281  |
| H | -2.4462830714 | -0.0310470252 | 6.4059815495  |
| H | -3.1862012506 | -1.5095022200 | 5.7002123160  |
| H | -0.0830191039 | -5.4475739930 | 1.9802270598  |
| H | 2.0643715273  | -6.6271186118 | 1.6820581019  |
| H | 2.0486066199  | -1.8103782697 | 2.8437914040  |
| H | -0.7622835070 | 1.8422900617  | 2.5326050963  |
| H | -0.4084377147 | 1.9394109221  | 0.0787212827  |
| H | -0.1565524777 | -0.1745817804 | -1.2121920252 |
| H | -0.2191790441 | -2.3429929481 | -0.0354493842 |
| H | -1.2398480433 | -3.4997942840 | 2.0184734104  |
| H | -0.7221321345 | -3.7428643227 | 4.5413436557  |
| H | -2.1337214305 | -2.8357826307 | 4.0318325227  |
| H | 0.5711306291  | -1.5576680575 | 4.7547738809  |
| H | -0.8098090445 | -1.6337326019 | 5.8263343684  |
| H | -0.5007716221 | 0.5343125780  | 4.5815912775  |

255

2-HP-B-CD:trans-(1S,4R)-SRT\_4\_MD E(Ha)= -7253.9114221936

|    |             |             |             |
|----|-------------|-------------|-------------|
| C  | -0.30035618 | 0.76359268  | -4.07150143 |
| C  | -0.17624391 | 0.72140852  | -2.56185757 |
| C  | -0.31917405 | 1.87056696  | -1.76989607 |
| C  | -0.47689857 | 3.24863240  | -2.37641812 |
| C  | -1.05267055 | 3.15621544  | -3.79987132 |
| C  | -0.24715211 | 2.17483046  | -4.63988867 |
| C  | 0.03896438  | -0.52027715 | -1.95376833 |
| C  | 0.05855000  | -0.64237333 | -0.57343173 |
| C  | -0.11785968 | 0.48837125  | 0.22197750  |
| C  | -0.27760327 | 1.73229496  | -0.37697144 |
| C  | 0.81950464  | 4.04427352  | -2.37674230 |
| C  | 0.76466648  | 5.43924172  | -2.28151043 |
| C  | 1.91520980  | 6.20772265  | -2.38654871 |
| C  | 3.15326306  | 5.60104286  | -2.59904849 |
| C  | 3.22315221  | 4.20653382  | -2.66028522 |
| C  | 2.06546251  | 3.43859532  | -2.53866038 |
| Cl | 4.56078440  | 6.58317483  | -2.77109924 |
| Cl | 4.73488838  | 3.39505478  | -2.89669840 |
| N  | -1.58058158 | 0.04402525  | -4.43102378 |
| C  | -1.95510199 | 0.03600593  | -5.85807486 |
| O  | 2.78467044  | -3.97166420 | -1.98642149 |
| C  | 3.35519201  | -3.04163685 | -1.06252025 |
| C  | 4.20178007  | -2.01120540 | -1.78149886 |
| C  | 4.86720118  | -1.14562273 | -0.69712935 |
| O  | 5.69851551  | -1.96249205 | 0.09331789  |
| C  | 4.98804663  | -2.90436331 | 0.88351714  |
| C  | 4.11353228  | -3.80524568 | 0.01085220  |
| O  | 3.82308634  | -0.55649085 | 0.03934414  |
| C  | 4.17684202  | 0.28640195  | 1.12728088  |
| C  | 4.49993488  | 1.69706165  | 0.66019246  |
| C  | 4.64155296  | 2.66597450  | 1.83526958  |
| C  | 3.49475217  | 2.56280020  | 2.85988043  |
| O  | 3.31613349  | 1.20246231  | 3.17052519  |
| C  | 2.96081664  | 0.39054452  | 2.05627110  |
| O  | 2.35352820  | 3.17818177  | 2.34993948  |
| C  | 1.45079834  | 3.81555479  | 3.26122721  |
| C  | 0.93139432  | 5.04097136  | 2.49911870  |
| C  | -0.39537540 | 5.56689577  | 3.02372541  |
| C  | -1.37313089 | 4.44972806  | 3.35456414  |
| O  | -0.79427098 | 3.54377222  | 4.23304987  |
| C  | 0.35762581  | 2.84075934  | 3.73587721  |
| O  | -1.76911960 | 3.80918062  | 2.15978838  |
| C  | -3.11934374 | 3.92674229  | 1.74086938  |
| C  | -3.06332418 | 4.17936317  | 0.23770620  |
| C  | -4.44656463 | 4.13846501  | -0.38335768 |
| C  | -5.14269428 | 2.82681979  | 0.01907695  |
| O  | -5.18124325 | 2.71165627  | 1.41862856  |
| C  | -3.89286384 | 2.64182139  | 2.03411957  |
| O  | -4.42866618 | 1.79195395  | -0.58183860 |
| C  | -5.06458440 | 0.58466556  | -0.97634623 |
| C  | -3.99996731 | -0.05307360 | -1.86529905 |
| C  | -4.25280683 | -1.51675392 | -2.18053553 |
| C  | -4.62223447 | -2.29274793 | -0.90708249 |
| O  | -5.68517891 | -1.64927094 | -0.25711565 |
| C  | -5.42563029 | -0.32391489 | 0.20227011  |
| O  | -4.29720221 | 4.22049645  | -1.77892368 |

|   |             |             |             |
|---|-------------|-------------|-------------|
| C | -5.42035124 | 4.72513844  | -2.46211038 |
| C | -5.37087880 | 4.22605483  | -3.88940954 |
| O | -5.43819504 | 2.80098642  | -3.81646499 |
| O | -2.44405436 | 5.40843465  | -0.06084945 |
| O | -1.01161398 | 6.38655880  | 2.04957628  |
| C | -0.90793578 | 7.79381219  | 2.23872928  |
| C | -1.57242202 | 8.48029201  | 1.05377998  |
| O | -2.92597416 | 8.10655165  | 0.93742240  |
| O | 1.84782038  | 6.10378312  | 2.56111873  |
| O | 4.78040392  | 3.92883843  | 1.22483656  |
| C | 5.04901109  | 5.02919839  | 2.07406324  |
| C | 4.91228819  | 6.26171253  | 1.19317212  |
| O | 3.64956143  | 6.20142049  | 0.52974707  |
| O | 5.69587740  | 1.67823292  | -0.08230091 |
| O | 3.37389445  | -1.22363773 | -2.60984929 |
| C | 3.57314720  | -1.29285185 | -4.00317996 |
| C | 2.94779010  | -2.52517000 | -4.66956837 |
| O | 1.64078805  | -2.75479527 | -4.15108411 |
| O | 3.05773334  | -4.36052857 | 0.78052217  |
| C | 3.15253477  | -5.60253340 | 1.41616931  |
| C | 2.29408649  | -6.59342649 | 0.60809374  |
| C | 0.84594118  | -6.14548487 | 0.65834218  |
| C | 0.37593647  | -5.71967734 | 2.04856593  |
| C | 1.38903621  | -4.81140655 | 2.73557060  |
| O | 2.65650275  | -5.46915095 | 2.72264718  |
| O | 2.67987785  | -6.56964929 | -0.75435925 |
| C | 3.74245220  | -7.45407687 | -1.09993516 |
| C | 4.12749443  | -7.22069701 | -2.55361357 |
| O | 4.72978172  | -5.95712072 | -2.73492138 |
| O | 0.00736435  | -7.15457320 | 0.13408865  |
| O | -0.82181790 | -5.01056230 | 1.75795853  |
| C | -1.95987574 | -5.10193955 | 2.56008180  |
| C | -3.08655447 | -5.65790079 | 1.69301495  |
| C | -3.29407761 | -4.73584387 | 0.50205485  |
| C | -3.56467006 | -3.31209656 | 0.97387356  |
| C | -2.48225073 | -2.86678139 | 1.96793382  |
| O | -2.31723667 | -3.82534636 | 3.02724295  |
| O | -2.74766008 | -6.93215587 | 1.17410115  |
| C | -3.09164224 | -8.02617622 | 2.03021343  |
| C | -2.19042960 | -9.21717304 | 1.73966519  |
| O | -0.85929535 | -8.93263864 | 2.10847920  |
| O | -4.35681857 | -5.20272695 | -0.30056528 |
| O | -3.47455908 | -2.39263678 | -0.10946874 |
| O | -3.07732957 | -1.99555485 | -2.79800555 |
| C | -3.21412075 | -3.17359868 | -3.56502622 |
| C | -1.82251286 | -3.69971685 | -3.88981509 |
| O | -1.11005364 | -2.65723508 | -4.54623220 |
| O | -3.88875266 | 0.65550316  | -3.09449722 |
| C | -6.68845796 | 0.07134280  | 0.96537490  |
| O | -6.60676489 | -0.21962037 | 2.34472163  |
| C | -2.75683150 | -1.51662481 | 2.58913398  |
| O | -4.04097545 | -1.47136898 | 3.15115818  |
| C | 1.06126090  | -4.40887124 | 4.17222722  |
| O | 0.27141076  | -3.23686250 | 4.22954129  |
| C | 5.98621300  | -3.68942659 | 1.71590343  |
| O | 6.54360803  | -4.72855608 | 0.94117922  |
| C | 2.44249795  | -0.92713987 | 2.59291014  |
| O | 1.15358380  | -0.73425592 | 3.12583782  |

|   |             |              |             |
|---|-------------|--------------|-------------|
| C | 0.79178649  | 1.99784316   | 4.92725665  |
| O | 1.16758613  | 2.81147104   | 6.01404187  |
| C | -4.13098482 | 2.38436705   | 3.51042160  |
| O | -4.67636070 | 1.11096787   | 3.75722909  |
| C | -6.51071164 | 4.78796349   | -4.71879051 |
| C | 4.97896815  | 7.55185683   | 1.97961268  |
| C | 2.85988455  | -2.34813399  | -6.17055707 |
| C | 5.12640530  | -8.26569388  | -3.01485037 |
| C | -2.64975912 | -10.43122467 | 2.52800212  |
| C | -1.51789814 | 9.98858031   | 1.21100670  |
| C | -1.09452830 | -4.19251594  | -2.64938789 |
| H | -6.19115213 | 2.82060965   | -0.30686412 |
| H | -5.04122404 | 4.97960932   | 0.00386670  |
| H | -2.49252141 | 3.34939178   | -0.20307651 |
| H | -3.60177367 | 4.78466659   | 2.23276631  |
| H | -2.25258025 | 4.85884584   | 3.86682086  |
| H | -0.20648060 | 6.13832931   | 3.94186816  |
| H | 0.76247870  | 4.71864715   | 1.46111874  |
| H | 1.99517241  | 4.17176572   | 4.14648740  |
| H | 3.77779525  | 3.02325369   | 3.81479195  |
| H | 5.56596553  | 2.40212332   | 2.37360323  |
| H | 3.65622106  | 2.03803530   | 0.03821959  |
| H | 5.03821874  | -0.12896412  | 1.66916566  |
| H | 5.52290475  | -0.38521870  | -1.12819508 |
| H | 5.00466276  | -2.49619506  | -2.35411157 |
| H | 2.54591000  | -2.48846327  | -0.57177262 |
| H | 4.72890470  | -4.58296961  | -0.45688595 |
| H | 4.19399963  | -5.93280572  | 1.49963842  |
| H | 2.39289409  | -7.60543893  | 1.02468059  |
| H | 0.77382862  | -5.24324944  | 0.03214739  |
| H | 0.16339436  | -6.60937679  | 2.65855808  |
| H | -1.77967068 | -5.72109387  | 3.44707933  |
| H | -4.01291022 | -5.71327474  | 2.28091702  |
| H | -2.35869979 | -4.71416977  | -0.07456322 |
| H | -4.55144601 | -3.25203093  | 1.44887240  |
| H | -5.01038962 | -3.28580418  | -1.14601028 |
| H | -5.11098358 | -1.58693178  | -2.86688649 |
| H | -3.05091167 | 0.00719362   | -1.31401046 |
| H | -5.96272680 | 0.80546597   | -1.57643136 |
| H | -4.57789646 | -0.32430788  | 0.89792750  |
| H | -1.53579133 | -2.78674956  | 1.41844520  |
| H | 1.45218111  | -3.87787022  | 2.16643724  |
| H | 4.32683866  | -2.37934160  | 1.58094546  |
| H | 2.14611345  | 0.86725820   | 1.49742504  |
| H | 0.06183705  | 2.19256084   | 2.90261402  |
| H | -3.32449107 | 1.80036795   | 1.61424318  |
| H | -1.74909764 | 5.56059484   | 0.61237808  |
| H | -0.90941680 | -6.85753709  | 0.27369312  |
| H | -4.24966487 | 1.55979014   | -3.00556077 |
| H | 2.40822720  | 6.12446300   | 1.75981445  |
| H | 5.84643307  | 2.58398280   | -0.37870247 |
| H | 2.49297817  | -4.75082443  | -1.47222585 |
| H | -4.19654320 | -6.14685597  | -0.42546302 |
| H | -5.42261650 | 5.82523774   | -2.44884812 |
| H | -6.36091397 | 4.37722575   | -2.00971720 |
| H | -4.40427517 | 4.52571773   | -4.32303737 |
| H | -7.47703255 | 4.49944335   | -4.29337037 |
| H | -6.46580828 | 4.41838589   | -5.74906180 |



|   |             |              |             |
|---|-------------|--------------|-------------|
| H | -6.46208092 | 5.87966590   | -4.76424229 |
| H | -5.63282371 | 2.46133950   | -4.69576740 |
| H | 6.05618589  | 4.95775982   | 2.50971845  |
| H | 4.30790916  | 5.08746995   | 2.88178503  |
| H | 5.70578735  | 6.24044271   | 0.43144401  |
| H | 5.94523129  | 7.64680602   | 2.48357758  |
| H | 4.18495120  | 7.58445903   | 2.73204996  |
| H | 4.85707120  | 8.40608802   | 1.30938881  |
| H | 3.59880881  | 5.30536984   | 0.16491781  |
| H | 4.64220005  | -1.24182396  | -4.26098694 |
| H | 3.09453944  | -0.39041584  | -4.40261066 |
| H | 3.56561073  | -3.40704061  | -4.44599226 |
| H | 3.84976021  | -2.17194296  | -6.60157024 |
| H | 2.22227406  | -1.49264501  | -6.42096867 |
| H | 2.43744090  | -3.24116390  | -6.63739430 |
| H | 1.79819898  | -3.12647698  | -3.26239299 |
| H | 3.40809509  | -8.49071909  | -0.95225829 |
| H | 4.62514453  | -7.27164749  | -0.47019672 |
| H | 3.20728200  | -7.30453655  | -3.15605169 |
| H | 4.71132391  | -9.27528285  | -2.94818389 |
| H | 6.03570960  | -8.21637668  | -2.40763416 |
| H | 5.40543982  | -8.07008494  | -4.05242763 |
| H | 4.05938419  | -5.26762938  | -2.62273205 |
| H | -1.97664854 | -1.32774863  | 3.34172850  |
| H | -2.62307346 | -0.77029835  | 1.79036756  |
| H | -4.14781030 | -0.57794328  | 3.53639099  |
| H | 0.59206320  | -5.23291298  | 4.72834307  |
| H | 2.00812423  | -4.17918956  | 4.66904226  |
| H | -0.63872378 | -3.42978102  | 3.94907479  |
| H | -4.14948340 | -8.28157119  | 1.87699680  |
| H | -2.95228319 | -7.74321116  | 3.08176305  |
| H | -2.25573912 | -9.43848149  | 0.66196034  |
| H | -3.67644370 | -10.71318129 | 2.27704341  |
| H | -2.59343107 | -10.22948266 | 3.60244793  |
| H | -1.99232474 | -11.27587939 | 2.31204941  |
| H | -0.42456625 | -8.48096375  | 1.36625141  |
| H | 6.74763826  | -2.98065342  | 2.06731262  |
| H | 5.46053507  | -4.08861006  | 2.59776619  |
| H | 7.35444881  | -5.02523879  | 1.36229405  |
| H | 0.14814330  | 8.07666873   | 2.31861784  |
| H | -1.43145954 | 8.07972451   | 3.16298787  |
| H | -1.01177838 | 8.19161353   | 0.14724337  |
| H | -2.07145856 | 10.29546390  | 2.10395690  |
| H | -1.98411259 | 10.46629868  | 0.34641532  |
| H | -0.48746284 | 10.34598046  | 1.29620971  |
| H | -2.95754002 | 7.20837063   | 0.57681177  |
| H | 2.42743884  | -1.64765723  | 1.76356346  |
| H | 3.14824158  | -1.29391417  | 3.35580840  |
| H | 0.88543604  | -1.55635195  | 3.57453238  |
| H | -3.76531868 | -2.95883162  | -4.49435344 |
| H | -3.75994106 | -3.95409878  | -3.01683367 |
| H | -1.95619978 | -4.54041444  | -4.58838681 |
| H | -0.07319068 | -4.49943732  | -2.89382316 |
| H | -1.60572968 | -5.06693704  | -2.23526270 |
| H | -1.07151310 | -3.40812749  | -1.88780947 |
| H | -0.14953433 | -2.84575150  | -4.54731837 |
| H | -0.04003407 | 1.32715596   | 5.18777313  |
| H | 1.64593645  | 1.37842348   | 4.65559227  |

|   |             |             |             |
|---|-------------|-------------|-------------|
| H | 0.39479834  | 3.34437656  | 6.23277267  |
| H | -6.87802519 | 1.14270635  | 0.89898351  |
| H | -7.53126868 | -0.45736942 | 0.49880830  |
| H | -6.11254804 | -1.04453738 | 2.46038296  |
| H | -3.17316581 | 2.43182457  | 4.03770515  |
| H | -4.78564551 | 3.17418908  | 3.90871482  |
| H | -5.50700956 | 0.98409470  | 3.25817933  |
| H | -2.39174365 | 0.39227661  | -3.86522462 |
| H | -1.46557496 | -0.96020013 | -4.16681965 |
| H | -2.76560025 | -0.68120477 | -5.98875253 |
| H | -1.10147592 | -0.28005004 | -6.45990399 |
| H | -2.28876949 | 1.02451942  | -6.17258985 |
| H | -0.19328917 | 5.92565567  | -2.11349247 |
| H | 1.87105793  | 7.28833331  | -2.30522431 |
| H | 2.15750574  | 2.35641229  | -2.56115141 |
| H | 0.20707024  | -1.38894988 | -2.58131350 |
| H | 0.22399783  | -1.61204288 | -0.11261344 |
| H | -0.09275319 | 0.38800988  | 1.30393838  |
| H | -0.37960502 | 2.61578334  | 0.24796292  |
| H | -1.19240172 | 3.81787304  | -1.77316565 |
| H | -1.04412049 | 4.14694222  | -4.26488368 |
| H | -2.10347858 | 2.84552467  | -3.73018113 |
| H | 0.80393406  | 2.48416137  | -4.64379590 |
| H | -0.55839381 | 2.18840513  | -5.68870950 |
| H | 0.48849836  | 0.14743340  | -4.52008701 |

255

2-HP-B-CD:trans-(1S,4R)-SRT\_5\_MD E(Ha)= -7253.9108353648

|    |             |             |             |
|----|-------------|-------------|-------------|
| C  | -0.23591181 | -0.70156239 | 3.93957864  |
| C  | -0.17882424 | -0.74173562 | 2.42718687  |
| C  | -0.24064405 | -1.95000221 | 1.72062477  |
| C  | -0.23138410 | -3.29754293 | 2.41210148  |
| C  | -0.67024779 | -3.18403318 | 3.88249838  |
| C  | 0.05584990  | -2.04716449 | 4.58562497  |
| C  | -0.14763024 | 0.46996326  | 1.72797395  |
| C  | -0.21005390 | 0.50058576  | 0.34299029  |
| C  | -0.29988471 | -0.69715546 | -0.36379140 |
| C  | -0.29407348 | -1.90340087 | 0.32324697  |
| C  | 1.11264376  | -3.99768068 | 2.28970600  |
| C  | 1.15064952  | -5.38157841 | 2.09748627  |
| C  | 2.35779958  | -6.06611620 | 2.04454900  |
| C  | 3.56102934  | -5.38275372 | 2.20603110  |
| C  | 3.53622643  | -3.99768537 | 2.39778529  |
| C  | 2.32334559  | -3.31211867 | 2.41220421  |
| Cl | 5.04677708  | -6.26102518 | 2.14966733  |
| Cl | 4.99956751  | -3.10438432 | 2.62992099  |
| N  | -1.60568606 | -0.15527824 | 4.29623101  |
| C  | -2.07273259 | -0.33156308 | 5.68687001  |
| C  | -5.14325116 | 0.61922585  | -0.64458866 |
| C  | -4.86027751 | -0.40355018 | 0.44875923  |
| C  | -3.80829200 | 0.12114459  | 1.41165152  |
| C  | -4.15523778 | 1.50105926  | 1.93934792  |
| C  | -4.55182185 | 2.43534920  | 0.77644908  |
| O  | -5.53603103 | 1.83630952  | -0.02726702 |
| O  | -3.37794207 | 2.74352877  | 0.06996971  |
| C  | -3.49076434 | 3.77575438  | -0.90794232 |
| C  | -3.56823094 | 5.16205945  | -0.27355605 |
| C  | -3.44997335 | 6.24504447  | -1.34077663 |
| C  | -2.14578630 | 6.06143673  | -2.12051767 |
| O  | -2.18160253 | 4.77187130  | -2.69837425 |
| C  | -2.20248363 | 3.71965651  | -1.74262000 |
| O  | -1.09667025 | 6.21151533  | -1.22906338 |
| C  | 0.19438851  | 6.64420199  | -1.65755717 |
| C  | 0.89427983  | 6.82022709  | -0.31338223 |
| C  | 2.40849992  | 6.86937881  | -0.37621545 |
| C  | 2.93182053  | 5.76947330  | -1.30056867 |
| O  | 2.33137916  | 5.89928601  | -2.54604809 |
| C  | 0.92530857  | 5.61683783  | -2.53811159 |
| O  | 2.60336310  | 4.51568908  | -0.74304156 |
| C  | 3.64082560  | 3.67191343  | -0.28479815 |
| C  | 2.94308212  | 2.79396345  | 0.73543770  |
| C  | 3.89742347  | 1.77471831  | 1.32106693  |
| C  | 4.51449543  | 0.98927435  | 0.14715567  |
| O  | 5.14959879  | 1.88150793  | -0.74371468 |
| C  | 4.27727310  | 2.81967153  | -1.37614321 |
| O  | 2.84214242  | 6.70100063  | 0.96475983  |
| C  | 4.16815863  | 7.14390204  | 1.23137404  |
| C  | 4.58951412  | 6.60440820  | 2.58989298  |
| O  | 4.67618876  | 5.19338030  | 2.57353194  |
| O  | 0.37242729  | 7.97114051  | 0.31305954  |
| O  | -3.54937132 | 7.46614470  | -0.65054107 |
| C  | -3.85524517 | 8.60531621  | -1.44673433 |
| C  | -2.87755792 | 9.72531764  | -1.11954805 |
| O  | -1.55671232 | 9.31913289  | -1.39124932 |

|   |             |             |             |
|---|-------------|-------------|-------------|
| O | -4.77519262 | 5.33359900  | 0.43629191  |
| O | -3.02719934 | 1.95706216  | 2.65428870  |
| C | -3.22537666 | 3.08207398  | 3.48662842  |
| C | -1.85938869 | 3.60443332  | 3.91479389  |
| O | -1.16223273 | 2.52551252  | 4.53104070  |
| O | -3.67300950 | -0.79204573 | 2.50021493  |
| O | -4.31032003 | -1.60294383 | -0.07585815 |
| C | -5.13421978 | -2.72121224 | -0.27915788 |
| C | -4.55708739 | -3.87149580 | 0.55813345  |
| C | -3.16802660 | -4.19954871 | 0.03435882  |
| C | -3.16435085 | -4.41962489 | -1.47511038 |
| C | -3.87281563 | -3.28292413 | -2.20368002 |
| O | -5.16585965 | -3.08101239 | -1.63096087 |
| O | -4.54255815 | -3.40614860 | 1.89308861  |
| C | -4.47647264 | -4.38579099 | 2.92545349  |
| C | -4.97949332 | -3.75230760 | 4.21791786  |
| O | -4.18196389 | -2.63308685 | 4.57684787  |
| O | -2.63023875 | -5.33504977 | 0.69251331  |
| O | -1.78432915 | -4.46548284 | -1.81218104 |
| C | -1.33276672 | -5.36956532 | -2.78779026 |
| C | -0.28470439 | -6.27709530 | -2.12752409 |
| C | 0.89769812  | -5.43116063 | -1.70963545 |
| C | 1.41221835  | -4.56369805 | -2.85896551 |
| C | 0.28708745  | -3.80740080 | -3.57726378 |
| O | -0.79780111 | -4.69320634 | -3.88406951 |
| O | -0.86423625 | -6.89419229 | -0.99512366 |
| C | -1.34446147 | -8.21564580 | -1.23781478 |
| C | -2.38336354 | -8.59301580 | -0.19315314 |
| O | -3.53949783 | -7.79290583 | -0.32684653 |
| O | 1.94084457  | -6.24908588 | -1.21804991 |
| O | 2.32535349  | -3.69911239 | -2.20275734 |
| C | 3.35143625  | -3.10910540 | -2.94534444 |
| C | 4.59302491  | -2.97111176 | -2.06813511 |
| C | 4.40778576  | -1.93618566 | -0.96031081 |
| C | 3.88162239  | -0.61520691 | -1.52030483 |
| C | 2.63465273  | -0.92768677 | -2.36002316 |
| O | 2.98778789  | -1.83060440 | -3.40900241 |
| O | 4.96443226  | -4.18288873 | -1.45402760 |
| C | 5.83729370  | -5.01892942 | -2.20541293 |
| C | 5.26039626  | -6.41835064 | -2.35378361 |
| O | 4.06739460  | -6.36470828 | -3.11723963 |
| O | 5.64658830  | -1.71542710 | -0.32801657 |
| O | 3.48196510  | 0.27126848  | -0.48048230 |
| O | 3.21436663  | 0.91588972  | 2.20745307  |
| C | 3.57437949  | 0.96827906  | 3.57292388  |
| C | 2.98730197  | 2.15768045  | 4.34451782  |
| O | 1.60942608  | 2.32494147  | 4.01484729  |
| O | 2.39853737  | 3.63007674  | 1.75650166  |
| C | 5.12466784  | 3.61213399  | -2.35460842 |
| O | 6.03589592  | 4.47222258  | -1.70891835 |
| C | 1.95719349  | 0.26492429  | -3.01104949 |
| O | 0.62037436  | -0.01080583 | -3.39507709 |
| C | 0.69991791  | -3.20504779 | -4.91567603 |
| O | -0.02004257 | -2.02787090 | -5.23489520 |
| C | -4.11172302 | -3.54951926 | -3.67797927 |
| O | -4.74334972 | -2.45955439 | -4.29881168 |
| C | -6.25066151 | 0.18475508  | -1.58244751 |
| O | -7.32204778 | -0.33033713 | -0.82102274 |

|   |             |              |             |
|---|-------------|--------------|-------------|
| C | -1.97599554 | 2.42585969   | -2.49783816 |
| O | -0.62491363 | 2.39829197   | -2.90534746 |
| C | 0.50823728  | 5.57292439   | -4.00750579 |
| O | 0.75071909  | 4.31908002   | -4.57922595 |
| C | 5.95105277  | 7.13968513   | 2.98809187  |
| C | -1.07985241 | 4.19476120   | 2.75089548  |
| C | -6.45292381 | -3.38122805  | 4.15708346  |
| C | -2.79369529 | -10.04574726 | -0.35634891 |
| C | 6.25313600  | -7.34207562  | -3.04012366 |
| C | -3.17008705 | 10.95909415  | -1.95299495 |
| C | 3.11140318  | 1.94701147   | 5.83865610  |
| H | 4.01302564  | 5.84931487   | -1.45315219 |
| H | 2.72885356  | 7.84372116   | -0.77217956 |
| H | 0.62741358  | 5.92122729   | 0.26646861  |
| H | 0.11182093  | 7.61504241   | -2.16712514 |
| H | -2.06814256 | 6.76596121   | -2.95644582 |
| H | -4.28094986 | 6.13159746   | -2.05439082 |
| H | -2.70582518 | 5.26683789   | 0.40152288  |
| H | -4.37648187 | 3.60511707   | -1.53645780 |
| H | -5.02787935 | 3.34571820   | 1.14516608  |
| H | -5.03109818 | 1.41802888   | 2.60301645  |
| H | -2.85238569 | 0.19103090   | 0.87698022  |
| H | -5.79238054 | -0.60859414  | 0.98927550  |
| H | -6.16757087 | -2.50082332  | 0.00542521  |
| H | -5.21783934 | -4.74606832  | 0.46780752  |
| H | -2.53792706 | -3.32260752  | 0.23419991  |
| H | -3.64288471 | -5.38535012  | -1.69844377 |
| H | -2.16684375 | -5.96739158  | -3.17384180 |
| H | 0.04551066  | -7.03209435  | -2.85336005 |
| H | 0.56048527  | -4.75451970  | -0.91287740 |
| H | 1.94923407  | -5.20079926  | -3.57713287 |
| H | 3.57370351  | -3.71373185  | -3.83259696 |
| H | 5.40134771  | -2.60269286  | -2.71669011 |
| H | 3.66028937  | -2.31126006  | -0.24361441 |
| H | 4.65675698  | -0.14478164  | -2.14202255 |
| H | 5.30052374  | 0.31507581   | 0.49357131  |
| H | 4.72160963  | 2.29593553   | 1.82926935  |
| H | 2.12517900  | 2.25180298   | 0.24411559  |
| H | 4.42620035  | 4.25321614   | 0.21583320  |
| H | 3.48962010  | 2.30127632   | -1.93565757 |
| H | 1.90246074  | -1.40440472  | -1.69768955 |
| H | -0.06340890 | -3.00184989  | -2.91861687 |
| H | -3.27727947 | -2.36747610  | -2.09615851 |
| H | -4.23073160 | 0.76930660   | -1.23868274 |
| H | -1.36074859 | 3.83929879   | -1.04614837 |
| H | 0.75955222  | 4.62204960   | -2.10917688 |
| H | 0.83179164  | 8.06505282   | 1.15514809  |
| H | 2.57100775  | -5.64204279  | -0.80269788 |
| H | 2.01645651  | 4.38623480   | 1.27948849  |
| H | -4.83886889 | 6.28825512   | 0.58175218  |
| H | -3.71504719 | -1.69459222  | 2.12282060  |
| H | -1.87478155 | -5.64438127  | 0.15290444  |
| H | 5.91046345  | -2.56436110  | 0.04768350  |
| H | 4.20240950  | 8.24344676   | 1.22207917  |
| H | 4.86886372  | 6.76973441   | 0.47171903  |
| H | 3.83763136  | 6.93311039   | 3.32746969  |
| H | 6.70500467  | 6.85048737   | 2.24925030  |
| H | 6.24495936  | 6.71966743   | 3.95264891  |

|   |             |              |             |
|---|-------------|--------------|-------------|
| H | 5.94117545  | 8.22997721   | 3.07177640  |
| H | 3.80232800  | 4.82456257   | 2.37422190  |
| H | -3.81881794 | 2.79948101   | 4.37070263  |
| H | -3.75615456 | 3.88941249   | 2.96378447  |
| H | -2.03804820 | 4.38881307   | 4.66610754  |
| H | -1.55073632 | 5.12171047   | 2.41051143  |
| H | -1.05602440 | 3.49507344   | 1.91103873  |
| H | -0.05707855 | 4.43749891   | 3.05666653  |
| H | -0.19944558 | 2.68360756   | 4.53204695  |
| H | -3.44569448 | -4.73702375  | 3.04342325  |
| H | -5.10364668 | -5.24907235  | 2.66286315  |
| H | -4.82327453 | -4.49307703  | 5.01173128  |
| H | -6.63898153 | -2.67983997  | 3.33674301  |
| H | -6.76174020 | -2.91297060  | 5.09481511  |
| H | -7.07714189 | -4.26452877  | 3.99179963  |
| H | -4.44709488 | -1.89247736  | 4.01368231  |
| H | -0.49670702 | -8.91439461  | -1.21977021 |
| H | -1.82384420 | -8.27154159  | -2.22535741 |
| H | -1.93035448 | -8.45475891  | 0.80244290  |
| H | -3.24320969 | -10.20495735 | -1.34171544 |
| H | -3.54135883 | -10.30237902 | 0.39707663  |
| H | -1.94006371 | -10.72086380 | -0.24728599 |
| H | -3.39107722 | -6.97016871  | 0.16399147  |
| H | 1.89166214  | 1.07293229   | -2.27991423 |
| H | 2.55491864  | 0.61309968   | -3.86449415 |
| H | 0.56858555  | -0.64068913  | -4.13929067 |
| H | 1.74242033  | -2.89485815  | -4.89259921 |
| H | 0.57537628  | -3.97198739  | -5.69116974 |
| H | -0.95440044 | -2.24510465  | -5.32191890 |
| H | 6.80757940  | -5.06432112  | -1.69283192 |
| H | 6.00259753  | -4.60238402  | -3.20791473 |
| H | 5.04758979  | -6.80026163  | -1.34361681 |
| H | 6.47121821  | -6.98093407  | -4.05041984 |
| H | 5.82847351  | -8.34466044  | -3.12834420 |
| H | 7.19326378  | -7.41068379  | -2.48412624 |
| H | 3.32111508  | -6.54409354  | -2.52686105 |
| H | -3.14834365 | -3.69796762  | -4.17586199 |
| H | -4.69572150 | -4.47795744  | -3.78652134 |
| H | -5.60755802 | -2.37558696  | -3.88152785 |
| H | -4.89039664 | 8.91732409   | -1.24868542 |
| H | -3.77077978 | 8.36499804   | -2.51454346 |
| H | -2.99232805 | 9.97209356   | -0.05140667 |
| H | -2.47303984 | 11.75818712  | -1.69142958 |
| H | -4.19069518 | 11.31966432  | -1.79339012 |
| H | -3.04036659 | 10.73512552  | -3.01683433 |
| H | -1.23809766 | 8.76230672   | -0.66656365 |
| H | -6.54917877 | 1.06202857   | -2.17180658 |
| H | -5.84118648 | -0.57193005  | -2.26748151 |
| H | -8.10107074 | -0.37938812  | -1.38103791 |
| H | 4.66778403  | 0.95789453   | 3.69830889  |
| H | 3.18457733  | 0.03801066   | 4.00327021  |
| H | 3.52767668  | 3.07307133   | 4.06249576  |
| H | 2.70889016  | 2.80664268   | 6.37999139  |
| H | 4.15827975  | 1.82047138   | 6.12952531  |
| H | 2.55955137  | 1.05337162   | 6.15064616  |
| H | 1.62917615  | 2.67962765   | 3.10669244  |
| H | -2.20076316 | 1.59114501   | -1.82125673 |
| H | -2.66339517 | 2.38151145   | -3.35624846 |

|   |             |             |             |
|---|-------------|-------------|-------------|
| H | -0.36640881 | 1.50480441  | -3.20609325 |
| H | 5.63706460  | 2.90062599  | -3.01793670 |
| H | 4.47207310  | 4.23387390  | -2.97519109 |
| H | 6.62028865  | 3.91719878  | -1.18004023 |
| H | -0.54282836 | 5.86892334  | -4.11396694 |
| H | 1.11320546  | 6.30843028  | -4.54912451 |
| H | 0.16478791  | 3.68726602  | -4.12910680 |
| H | -2.32196132 | -0.50926171 | 3.62910468  |
| H | -1.55564773 | 0.87481325  | 4.12960544  |
| H | -2.36880105 | -1.36627214 | 5.85758078  |
| H | -2.94028647 | 0.31393253  | 5.83107331  |
| H | -1.28686489 | -0.02457481 | 6.37832675  |
| H | 0.22357791  | -5.93457791 | 1.97167982  |
| H | 2.37824066  | -7.13724548 | 1.87588737  |
| H | 2.34356405  | -2.22885683 | 2.49377573  |
| H | -0.08968620 | 1.39384942  | 2.29085771  |
| H | -0.19800509 | 1.44514848  | -0.19359079 |
| H | -0.34411408 | -0.68059689 | -1.44913080 |
| H | -0.34742010 | -2.83472757 | -0.23450216 |
| H | -0.96152740 | -3.94069969 | 1.90640025  |
| H | -0.47487448 | -4.13084644 | 4.39602374  |
| H | -1.75540406 | -3.02139078 | 3.92661020  |
| H | 1.13862933  | -2.20589972 | 4.52644605  |
| H | -0.17964985 | -2.02682165 | 5.65378058  |
| H | 0.46441787  | 0.05729435  | 4.30728379  |

2-HP-B-CD:trans-(1S,4R)-SRT\_6\_MD E(Ha)= -7253.9091817336

|    |             |             |             |
|----|-------------|-------------|-------------|
| C  | -1.01365011 | -0.08096597 | 4.01423610  |
| C  | -0.65708735 | -0.18215968 | 2.54912218  |
| C  | -0.81884052 | -1.38212132 | 1.84285815  |
| C  | -1.24351197 | -2.68121007 | 2.50926190  |
| C  | -1.78988172 | -2.47511765 | 3.93587633  |
| C  | -1.00298277 | -1.42986200 | 4.71187544  |
| C  | -0.21302054 | 0.96598771  | 1.88004958  |
| C  | 0.03668138  | 0.94615826  | 0.51525061  |
| C  | -0.14922345 | -0.23672640 | -0.20167148 |
| C  | -0.55714484 | -1.38510771 | 0.46576495  |
| C  | -0.13979119 | -3.72901323 | 2.46560045  |
| C  | -0.44063758 | -5.02146415 | 2.02422030  |
| C  | 0.52829922  | -6.01786647 | 1.99869623  |
| C  | 1.82409131  | -5.74182551 | 2.42650378  |
| C  | 2.13712020  | -4.45074410 | 2.86064763  |
| C  | 1.16762901  | -3.45113208 | 2.87395540  |
| Cl | 3.01172486  | -6.99467024 | 2.39897648  |
| Cl | 3.74271255  | -4.07211093 | 3.39632823  |
| N  | -2.36511583 | 0.60468444  | 4.08597535  |
| C  | -3.01832062 | 0.64417578  | 5.41066118  |
| C  | -5.44461363 | 0.29205489  | -1.25154389 |
| C  | -5.26081012 | -0.44653726 | 0.07598275  |
| C  | -4.27173470 | 0.29492114  | 0.97113591  |
| C  | -4.65147056 | 1.74675150  | 1.15898931  |
| C  | -4.84072448 | 2.39623197  | -0.22792701 |
| O  | -5.76712718 | 1.65866212  | -0.98286075 |
| O  | -3.58432300 | 2.47830376  | -0.83788308 |
| C  | -3.45468621 | 3.41188366  | -1.90831331 |
| C  | -3.40130059 | 4.84374828  | -1.37249879 |
| C  | -2.87799345 | 5.83078373  | -2.40657367 |
| C  | -1.54244755 | 5.33419905  | -2.95491042 |
| O  | -1.74070198 | 4.07477119  | -3.52432969 |
| C  | -2.10337010 | 3.08712330  | -2.55822805 |
| O  | -0.66035223 | 5.24932796  | -1.87555610 |
| C  | 0.59548069  | 5.90890600  | -1.85636272 |
| C  | 0.72947504  | 6.23996150  | -0.36959135 |
| C  | 2.11989779  | 6.68879033  | 0.06014971  |
| C  | 3.18669030  | 5.83273300  | -0.65741307 |
| O  | 2.94264302  | 5.74652442  | -2.03710748 |
| C  | 1.73929194  | 5.01903983  | -2.31873814 |
| O  | 3.12625000  | 4.55812385  | -0.09961362 |
| C  | 4.25284672  | 3.91977283  | 0.48242135  |
| C  | 3.57707072  | 3.03507999  | 1.52039465  |
| C  | 4.53274088  | 1.99005400  | 2.05550452  |
| C  | 5.11276881  | 1.23404973  | 0.85193022  |
| O  | 5.85630884  | 2.13369280  | 0.06101126  |
| C  | 5.08584573  | 3.16689003  | -0.55169067 |
| O  | 2.34599594  | 6.48394375  | 1.44563488  |
| C  | 1.62255109  | 7.32188777  | 2.34377439  |
| C  | 1.71550466  | 6.76445159  | 3.76106022  |
| O  | 1.04096395  | 5.51389170  | 3.87572706  |
| O  | -0.24951782 | 7.21048051  | -0.02441586 |
| O  | -2.73922741 | 7.07164243  | -1.73402379 |
| C  | -2.85584513 | 8.21834542  | -2.58148365 |
| C  | -2.06099007 | 9.37891430  | -2.00121612 |
| O  | -0.67770611 | 9.10814935  | -2.05804239 |



|   |             |             |             |
|---|-------------|-------------|-------------|
| O | -4.67113203 | 5.26332520  | -0.91446036 |
| O | -3.63760523 | 2.36230394  | 1.92337993  |
| C | -4.00945986 | 3.58787932  | 2.52391082  |
| C | -2.77605078 | 4.27157296  | 3.08843225  |
| O | -2.18229398 | 3.39083196  | 4.04885561  |
| O | -4.22700025 | -0.37353885 | 2.22924939  |
| O | -4.65193714 | -1.72933132 | -0.01146554 |
| C | -5.33136283 | -2.78640331 | -0.62916604 |
| C | -4.82646595 | -4.09767395 | -0.02363850 |
| C | -3.40686102 | -4.39272479 | -0.48521137 |
| C | -3.18061917 | -4.16346622 | -1.98111675 |
| C | -3.75225978 | -2.81167970 | -2.39366478 |
| O | -5.13205728 | -2.78951796 | -2.01352451 |
| O | -4.88327697 | -3.97931127 | 1.38150994  |
| C | -5.25559812 | -5.16160075 | 2.08644469  |
| C | -5.17580913 | -4.81289672 | 3.56216958  |
| O | -5.91472267 | -3.63543471 | 3.82198892  |
| O | -3.06266789 | -5.70043054 | -0.11208075 |
| O | -1.76707072 | -4.18146812 | -2.09335520 |
| C | -1.11152515 | -4.86241022 | -3.12322524 |
| C | -0.05081907 | -5.75159522 | -2.45835410 |
| C | 0.96720863  | -4.85795391 | -1.77215607 |
| C | 1.49053779  | -3.77878598 | -2.71307243 |
| C | 0.33464785  | -3.01697992 | -3.36059948 |
| O | -0.51043620 | -3.96795842 | -4.01684082 |
| O | -0.67180967 | -6.58418731 | -1.49913851 |
| C | -0.65922018 | -7.98578988 | -1.75881475 |
| C | 0.72275755  | -8.61032736 | -1.57180408 |
| O | 1.27556755  | -8.21875915 | -0.33971503 |
| O | 2.04122374  | -5.63636467 | -1.28149436 |
| O | 2.30174686  | -2.93960956 | -1.91299173 |
| C | 3.64887779  | -2.75541146 | -2.26375594 |
| C | 4.50462384  | -2.89905297 | -1.00665150 |
| C | 4.24831091  | -1.76227931 | -0.01980667 |
| C | 4.41888357  | -0.42232705 | -0.73077353 |
| C | 3.51528731  | -0.41091919 | -1.97522626 |
| O | 3.86818901  | -1.49469974 | -2.82996592 |
| O | 4.28654699  | -4.14353717 | -0.36040094 |
| C | 5.38038515  | -5.06656238 | -0.36302266 |
| C | 5.05907344  | -6.33031299 | -1.15654641 |
| O | 4.60089206  | -5.99491980 | -2.45395974 |
| O | 5.15887041  | -1.82922987 | 1.05157122  |
| O | 4.05610341  | 0.65130080  | 0.13176564  |
| O | 3.91915710  | 1.06131495  | 2.91137898  |
| C | 3.78493942  | 1.46225943  | 4.26488646  |
| C | 3.20960831  | 0.25040094  | 4.98318427  |
| O | 2.01999564  | -0.14463956 | 4.30478290  |
| O | 3.05276081  | 3.88987588  | 2.52290509  |
| C | 6.09092538  | 4.05759730  | -1.26209493 |
| O | 6.94771753  | 4.71301719  | -0.36028072 |
| C | 3.64405412  | 0.85838837  | -2.79304677 |
| O | 2.86325914  | 0.79744572  | -3.96783480 |
| C | 0.73237492  | -1.95520478 | -4.38057940 |
| O | 0.71619196  | -0.69092747 | -3.75866410 |
| C | -3.68550099 | -2.44823719 | -3.86647769 |
| O | -3.86832203 | -1.06846839 | -4.06831032 |
| C | -6.60007069 | -0.18114229 | -2.12533686 |
| O | -6.42609132 | 0.22863603  | -3.46664309 |

|   |             |              |             |
|---|-------------|--------------|-------------|
| C | -1.98321012 | 1.75181889   | -3.25513702 |
| O | -0.61192597 | 1.59345804   | -3.52635537 |
| C | 1.73411014  | 4.58957109   | -3.79271616 |
| O | 1.57064475  | 3.19857090   | -3.95207722 |
| C | 3.13892068  | 6.68721916   | 4.29282014  |
| C | -1.76573249 | 4.66792793   | 2.02873925  |
| C | -5.71993174 | -5.92404699  | 4.43594715  |
| C | 0.62925073  | -10.12392461 | -1.60073421 |
| C | 6.29626539  | -7.20089641  | -1.27973299 |
| C | -2.32666934 | 10.64873840  | -2.79106187 |
| C | 4.20963478  | -0.89048105  | 5.06627917  |
| H | 4.17847438  | 6.28156609   | -0.53628306 |
| H | 2.27003658  | 7.74513205   | -0.20668496 |
| H | 0.52623637  | 5.30351497   | 0.17107501  |
| H | 0.55841151  | 6.83411643   | -2.44878687 |
| H | -1.15098381 | 5.98705537   | -3.74349115 |
| H | -3.60069939 | 5.91566134   | -3.22973018 |
| H | -2.68179995 | 4.82701899   | -0.54352842 |
| H | -4.28393217 | 3.30276207   | -2.62184161 |
| H | -5.29367817 | 3.38526492   | -0.13817421 |
| H | -5.61855692 | 1.80153285   | 1.68375462  |
| H | -3.28339700 | 0.25642524   | 0.49162974  |
| H | -6.23015710 | -0.52863927  | 0.59479951  |
| H | -6.41365475 | -2.69053165  | -0.47067834 |
| H | -5.49217759 | -4.89885333  | -0.37414646 |
| H | -2.75907875 | -3.65524807  | 0.01722790  |
| H | -3.63222423 | -4.97997365  | -2.56333625 |
| H | -1.81566462 | -5.46435105  | -3.71021718 |
| H | 0.44321961  | -6.34729352  | -3.23684373 |
| H | 0.46274012  | -4.36190825  | -0.93213707 |
| H | 2.08965383  | -4.24977641  | -3.50775620 |
| H | 3.96209310  | -3.49242785  | -3.01144678 |
| H | 5.55220037  | -2.82855093  | -1.32493252 |
| H | 3.20950565  | -1.82426864  | 0.33915798  |
| H | 5.46446891  | -0.30593536  | -1.05116351 |
| H | 5.81771189  | 0.46972184   | 1.18894514  |
| H | 5.37893424  | 2.47474205   | 2.56654482  |
| H | 2.76219371  | 2.49277545   | 1.02110098  |
| H | 4.89167266  | 4.65026805   | 0.99755365  |
| H | 4.40177064  | 2.74345594   | -1.28849281 |
| H | 2.47055858  | -0.52632434  | -1.65798887 |
| H | -0.23726615 | -2.50177893  | -2.58065588 |
| H | -3.20552782 | -2.03413694  | -1.84417309 |
| H | -4.51407748 | 0.21812120   | -1.82945705 |
| H | -1.36063601 | 3.08385117   | -1.75141840 |
| H | 1.72700574  | 4.09358200   | -1.73277734 |
| H | -1.08450442 | 6.90650383   | -0.42466781 |
| H | 2.64980266  | -5.03344968  | -0.80348909 |
| H | 2.74018259  | 4.67749036   | 2.03293023  |
| H | -4.57882331 | 6.20681065   | -0.72739044 |
| H | -4.15927270 | -1.31449242  | 2.00130597  |
| H | -2.20368328 | -5.90907806  | -0.52665485 |
| H | 4.92958849  | -2.61217660  | 1.56720872  |
| H | 0.57149368  | 7.37361877   | 2.04758590  |
| H | 2.04046557  | 8.33980952   | 2.31950435  |
| H | 1.14197556  | 7.46311638   | 4.38459724  |
| H | 3.73879991  | 5.98354375   | 3.70883334  |
| H | 3.13233784  | 6.35282201   | 5.33362265  |

|   |             |              |             |
|---|-------------|--------------|-------------|
| H | 3.62312885  | 7.66729455   | 4.25016070  |
| H | 1.66304545  | 4.81237870   | 3.63624999  |
| H | -4.74218942 | 3.40818735   | 3.32637337  |
| H | -4.46409546 | 4.27196897   | 1.79368588  |
| H | -3.13370935 | 5.17045252   | 3.61285875  |
| H | -2.15956459 | 5.48616795   | 1.41945394  |
| H | -1.54433181 | 3.81495478   | 1.38077756  |
| H | -0.84092542 | 5.02601438   | 2.49566038  |
| H | -1.37488397 | 3.81833054   | 4.36105868  |
| H | -4.58268777 | -5.98829066  | 1.83514412  |
| H | -6.28689255 | -5.44001078  | 1.81930658  |
| H | -4.11026264 | -4.64861705  | 3.80384281  |
| H | -5.14000340 | -6.84344857  | 4.31124514  |
| H | -6.76600936 | -6.12729240  | 4.18767034  |
| H | -5.67427072 | -5.62766945  | 5.48662708  |
| H | -5.81181814 | -3.08277978  | 3.03816880  |
| H | -1.05232247 | -8.19712028  | -2.76457894 |
| H | -1.34962113 | -8.41112507  | -1.02383944 |
| H | 1.37609184  | -8.28186727  | -2.39875562 |
| H | 0.19243744  | -10.48146655 | -2.53821886 |
| H | 0.01355544  | -10.47877442 | -0.76824569 |
| H | 1.62524859  | -10.55887438 | -1.49350107 |
| H | 1.52981636  | -7.28723567  | -0.44002601 |
| H | 3.29891774  | 1.68341475   | -2.16410923 |
| H | 4.70142246  | 1.02244265   | -3.04897184 |
| H | 2.50601637  | 1.69725786   | -4.12198801 |
| H | 1.72169685  | -2.15933147  | -4.80702024 |
| H | -0.00086170 | -1.99203905  | -5.19643996 |
| H | 1.58029719  | -0.22493808  | -3.88401965 |
| H | 5.60649394  | -5.32406942  | 0.67879696  |
| H | 6.26345943  | -4.58395261  | -0.79875220 |
| H | 4.27895132  | -6.89140084  | -0.62027212 |
| H | 6.70983601  | -7.45049932  | -0.29758441 |
| H | 7.06554536  | -6.68329002  | -1.86172961 |
| H | 6.04874185  | -8.13008043  | -1.79749894 |
| H | 3.63592566  | -5.98638218  | -2.39668082 |
| H | -2.68781251 | -2.69939794  | -4.24147570 |
| H | -4.41689146 | -3.05362642  | -4.42248206 |
| H | -4.80702377 | -0.83294057  | -3.99749592 |
| H | -3.91823314 | 8.47955435   | -2.68679296 |
| H | -2.45288681 | 7.99694802   | -3.57809539 |
| H | -2.38560764 | 9.52637622   | -0.95833334 |
| H | -1.74189570 | 11.46904161  | -2.36986619 |
| H | -3.38482869 | 10.92525387  | -2.76918449 |
| H | -2.01897912 | 10.51953164  | -3.83363486 |
| H | -0.42173527 | 8.62265842   | -1.25805124 |
| H | -6.65408062 | -1.26622186  | -2.16223299 |
| H | -7.53436979 | 0.21264522   | -1.70115051 |
| H | -6.37954314 | 1.19118107   | -3.47350564 |
| H | 3.11021716  | 2.32183556   | 4.34565655  |
| H | 4.76139516  | 1.74233841   | 4.68744540  |
| H | 2.90417018  | 0.55380167   | 5.99191407  |
| H | 3.74437910  | -1.77415323  | 5.50864412  |
| H | 5.06957066  | -0.60735970  | 5.68227464  |
| H | 4.56955630  | -1.14549114  | 4.06543752  |
| H | 2.22730325  | -0.05144911  | 3.36317930  |
| H | -2.35841252 | 0.96458168   | -2.59105507 |
| H | -2.58911374 | 1.74071829   | -4.17261580 |

|   |             |             |             |
|---|-------------|-------------|-------------|
| H | -0.37737079 | 0.66849602  | -3.74689751 |
| H | 6.64848936  | 3.44003649  | -1.98168477 |
| H | 5.55961989  | 4.82673827  | -1.83127310 |
| H | 7.42562188  | 4.02176882  | 0.11215016  |
| H | 0.97477862  | 5.13597216  | -4.36738754 |
| H | 2.70962490  | 4.85231011  | -4.21220584 |
| H | 0.64346569  | 2.91020069  | -3.82743055 |
| H | -3.01796246 | 0.19252174  | 3.38378171  |
| H | -2.23875418 | 1.59233367  | 3.78926920  |
| H | -3.86422370 | 1.32928963  | 5.35278262  |
| H | -2.31020729 | 1.01046452  | 6.15554071  |
| H | -3.37142098 | -0.34855090 | 5.68822135  |
| H | -1.44401287 | -5.25877995 | 1.67666616  |
| H | 0.30297301  | -7.00915537 | 1.61716376  |
| H | 1.45606113  | -2.45755269 | 3.20582024  |
| H | -0.06428289 | 1.88486517  | 2.44305960  |
| H | 0.37677245  | 1.84410998  | 0.00760148  |
| H | 0.03183188  | -0.25963490 | -1.27376357 |
| H | -0.68166614 | -2.31207414 | -0.08928107 |
| H | -2.06873372 | -3.09681350 | 1.91825239  |
| H | -1.77434832 | -3.43069607 | 4.46835139  |
| H | -2.84822183 | -2.18344420 | 3.87986252  |
| H | 0.05036214  | -1.71401627 | 4.79551448  |
| H | -1.37049148 | -1.34315284 | 5.73927760  |
| H | -0.30719001 | 0.58865849  | 4.51421241  |

## 2.- Geometry differences between molecular dynamics candidates and optimized DFT structures

Table S1. Differences, in percent, between parameters involved in hydrogen bonds obtained from molecular dynamics and DFT optimizations. Donor (D), acceptor (A) and angle ( $\theta$ ) in a hydrogen bond.

| BCD:I_MD1   |          |      |       | BCD:I_MD2   |          |      |       | BCD:I_MD3   |          |       |       |
|-------------|----------|------|-------|-------------|----------|------|-------|-------------|----------|-------|-------|
| H. Bond     | $\theta$ | DA   | HA    | H. Bond     | $\theta$ | DA   | HA    | H. Bond     | $\theta$ | DA    | HA    |
| N-H...O     | 6.20     | 1.47 | 8.00  | N-H...O     | 6.53     | 4.03 | 9.71  | N-H...O     | 4.05     | 3.79  | 0.57  |
| N-H...O     | 1.26     | 0.00 | 0.00  | N-H...O     | 18.88    | 0.37 | 11.83 | N-H...O     | 13.30    | 0.37  | 7.69  |
| O-H...C     | 11.90    | 6.63 | 3.64  | O-H...C     | 5.26     | 1.58 | 4.08  | O-H...C     | 2.11     | 0.57  | 2.92  |
| HPBCD:I_MD1 |          |      |       | HPBCD:I_MD2 |          |      |       | HPBCD:I_MD3 |          |       |       |
| N-H...O     | 5.04     | 2.56 | 2.94  | N-H...O     | 4.21     | 0.74 | 1.20  | N-H...O     | 4.81     | 8.77  | 11.35 |
| N-H...O     | 1.16     | 7.64 | 13.68 | N-H...O     | 3.15     | 4.29 | 6.78  | N-H...O     | 4.49     | 10.38 | 19.83 |

## 3.- Non Covalent Interaction index

Electron density with an isosurface of 0.01 atomic units, in white for HPBCD and Orange for SRT. Non-covalent interactions index in green (weak interactions) and blue (strong interactions) isosurfaces.

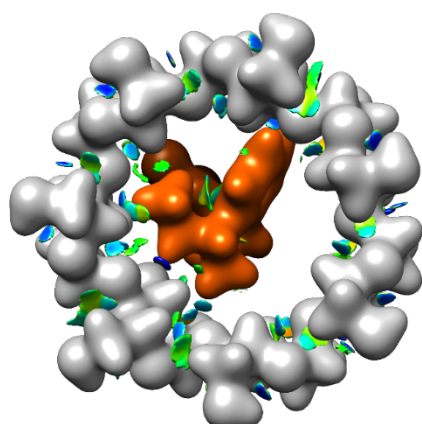

$\beta$ CD:I\_CI1

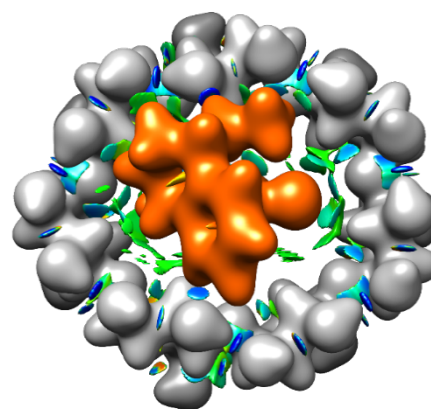

$\beta$ CD:I\_CI2

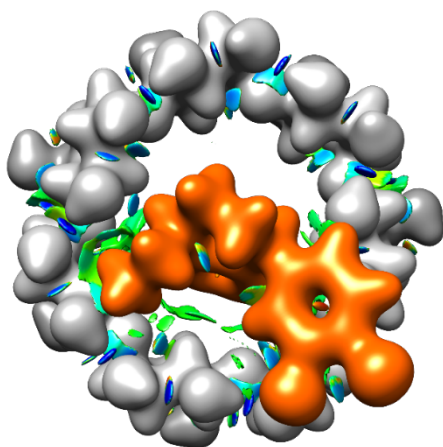

$\beta$ CD:I\_CI3

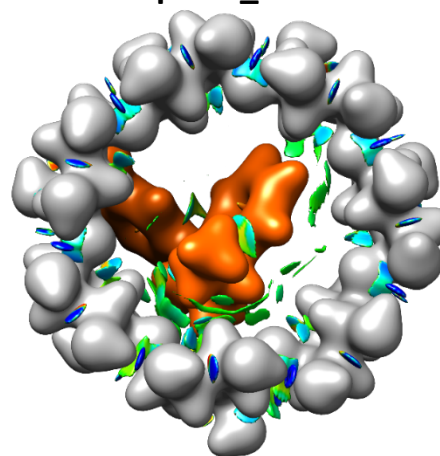

$\beta$ CD:I\_CI4

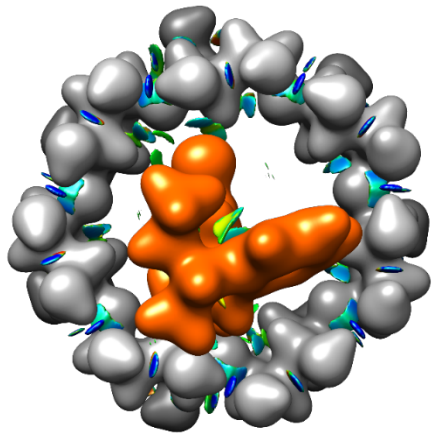

$\beta$ CD:I\_C15

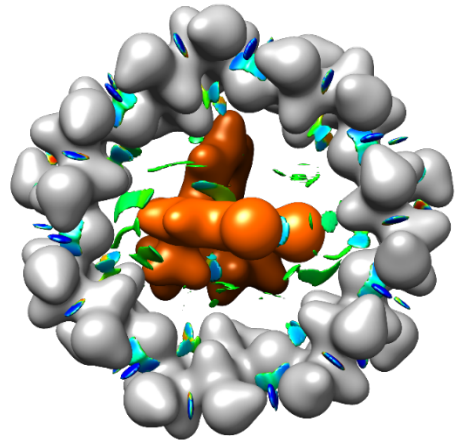

$\beta$ CD:I\_C16

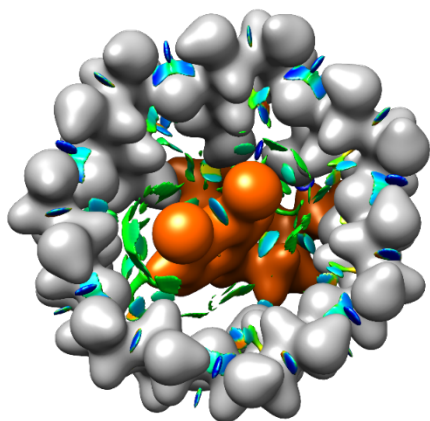

$\beta$ CD:I\_MD1

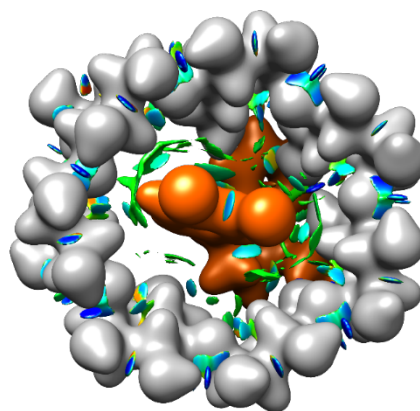

$\beta$ CD:I\_MD2

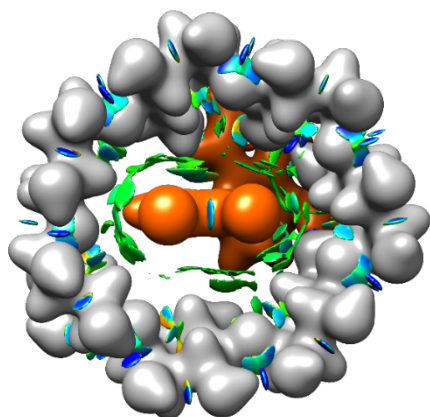

$\beta$ CD:I\_MD3

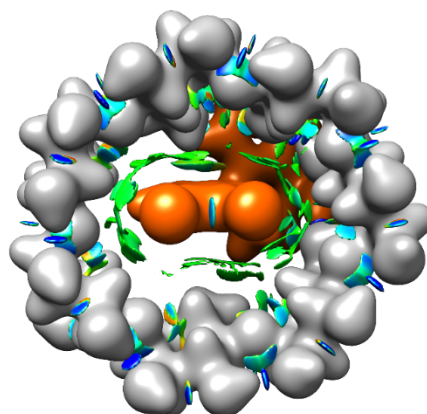

$\beta$ CD:I\_MD4

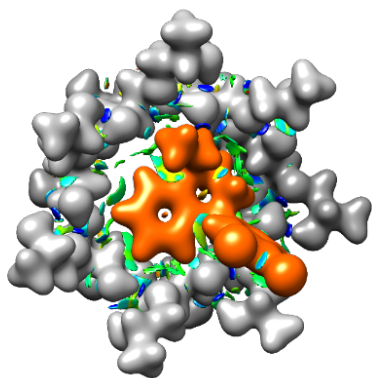

HPβCD:I\_CI1

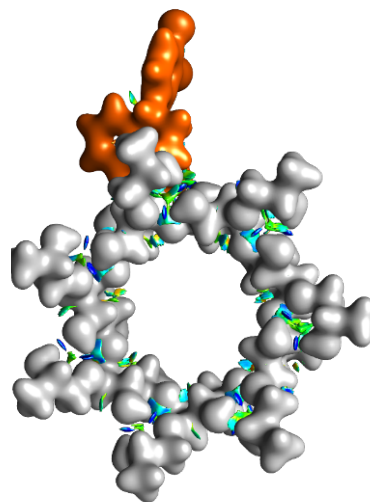

HPβCD:I\_CI2

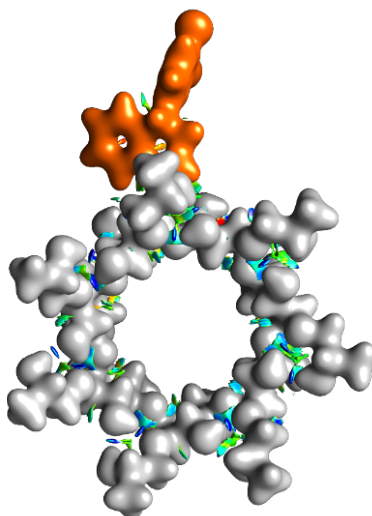

HPβCD:I\_CI3

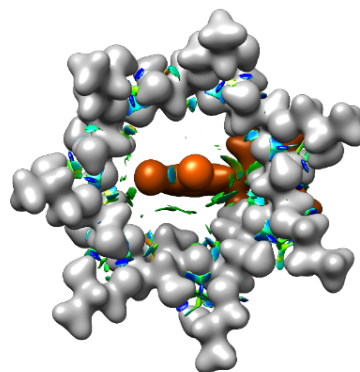

HPβCD:I\_CI4

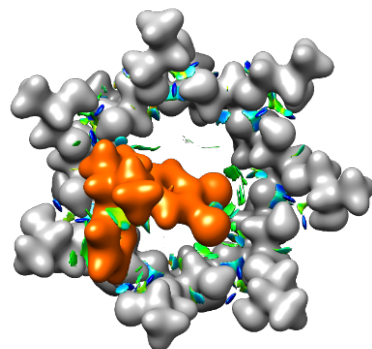

HPβCD:I\_CI5

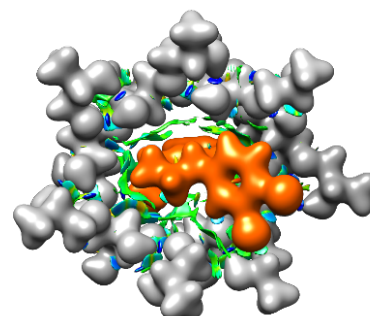

HPβCD:I\_CI6



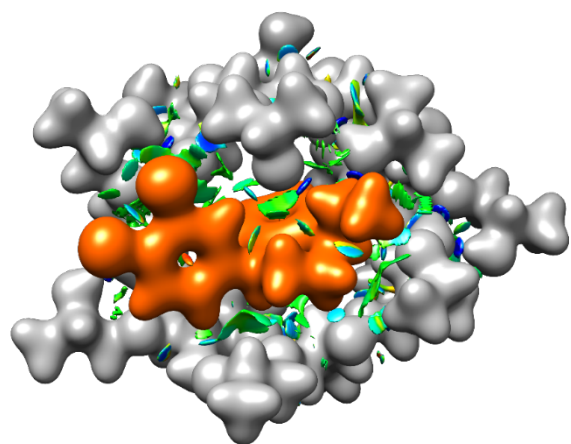

HPβCD:I\_MD1

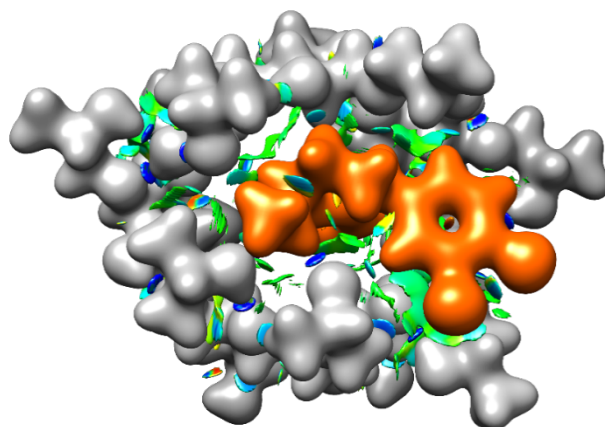

HPβCD:I\_MD2

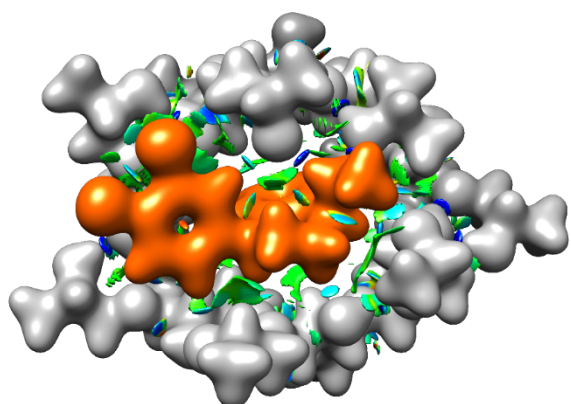

HPβCD:I\_MD3

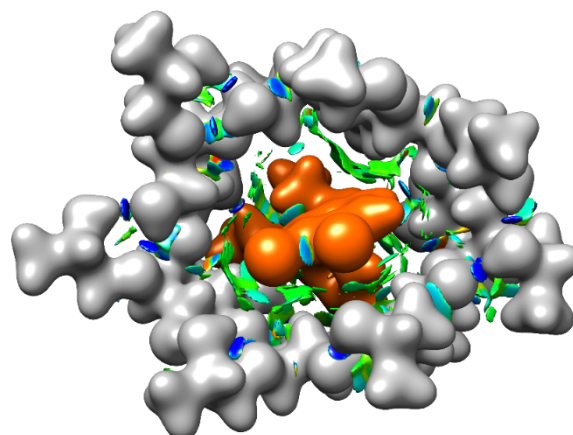

HPβCD:I\_MD4

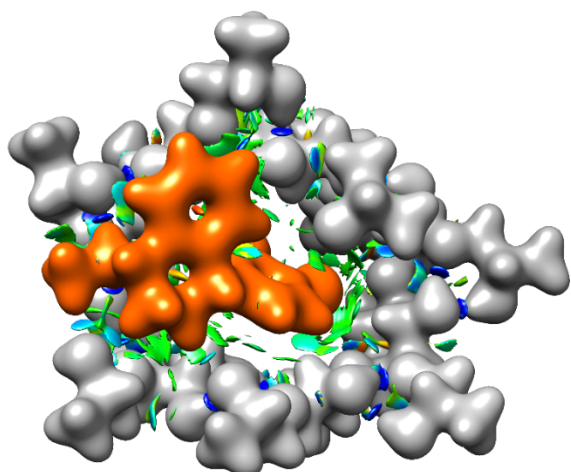

HPβCD:I\_MD5

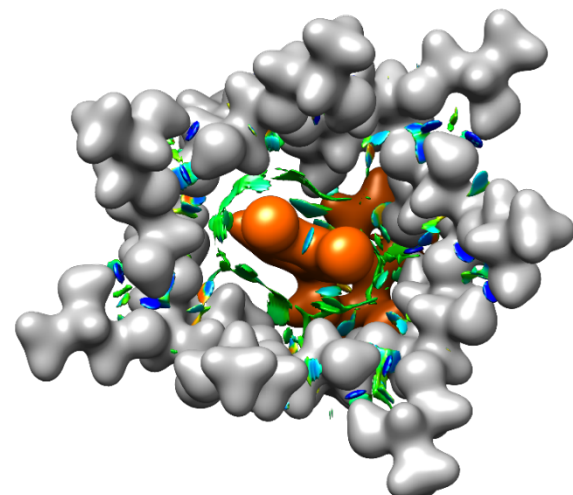

HPβCD:I\_MD6

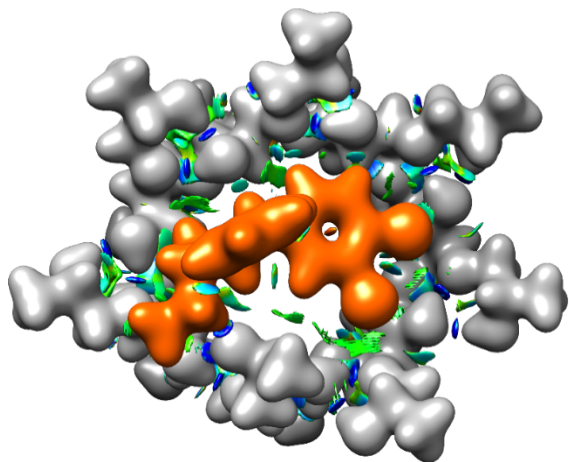

HPβCD:II\_CI1

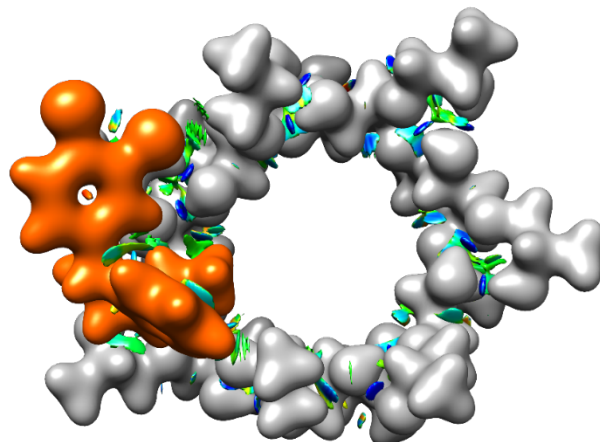

HPβCD:II\_CI2

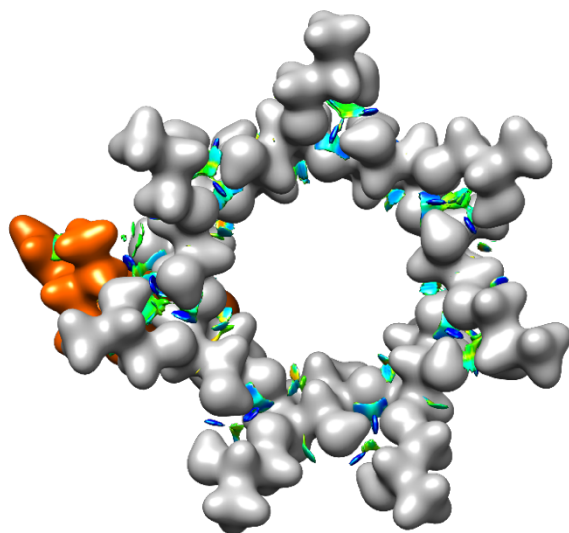

HPβCD:II\_CI3

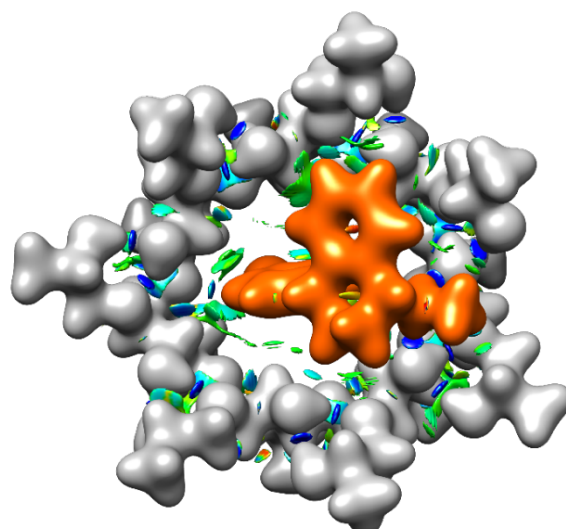

HPβCD:II\_CI4

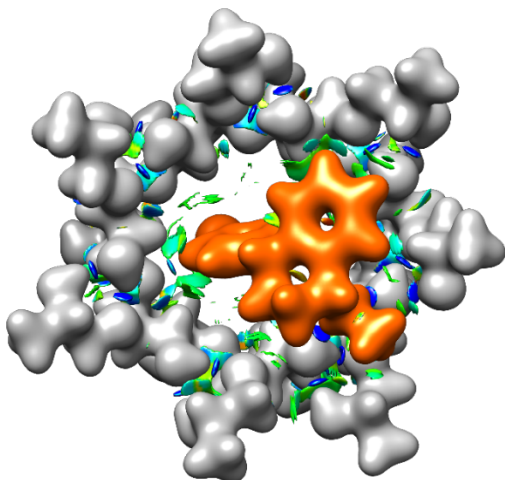

HPβCD:II\_CI5

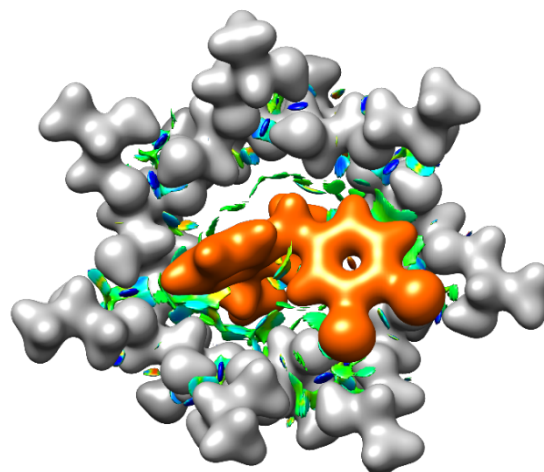

HPβCD:II\_CI6

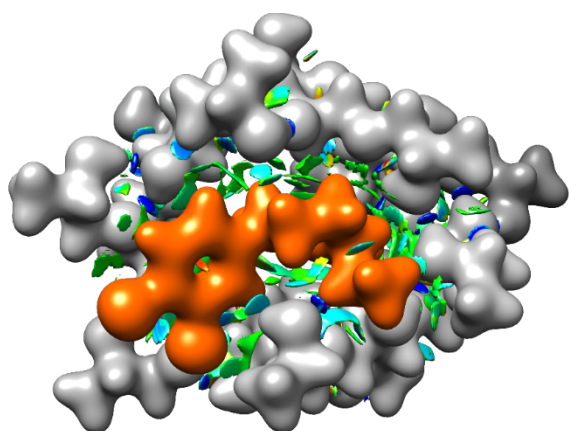

HPβCD:II\_MD1

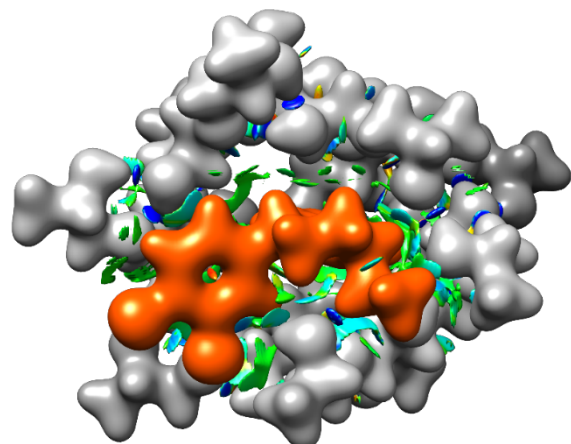

HPβCD:II\_MD2

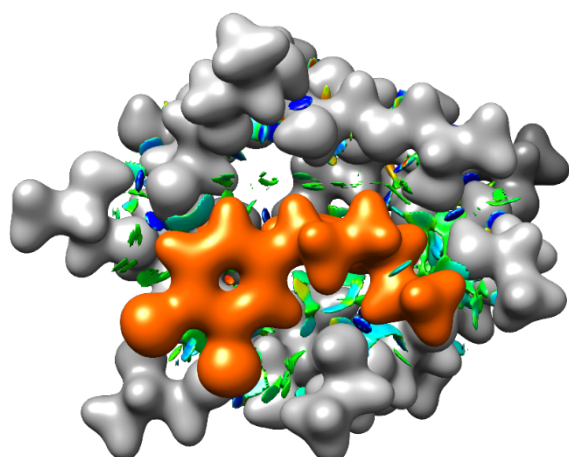

HPHPβCD:II\_MD3

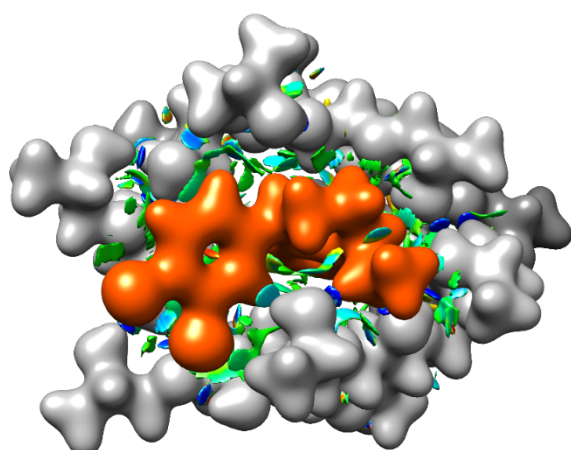

HPβCD:II\_MD4

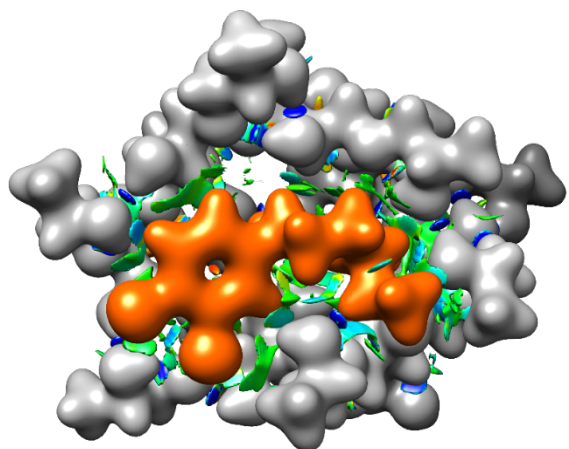

HPβCD:II\_MD5

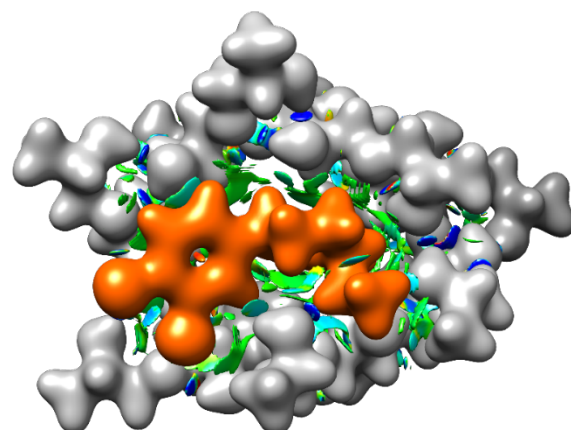

HPβCD:II\_MD6

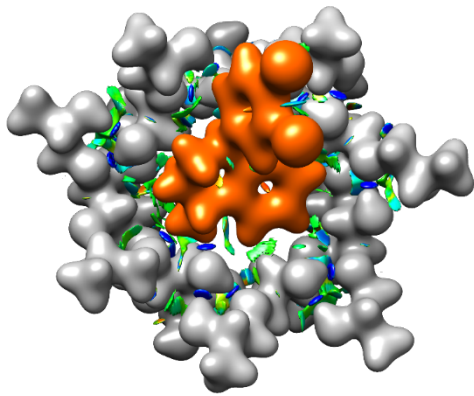

HPβCD:III\_CI1

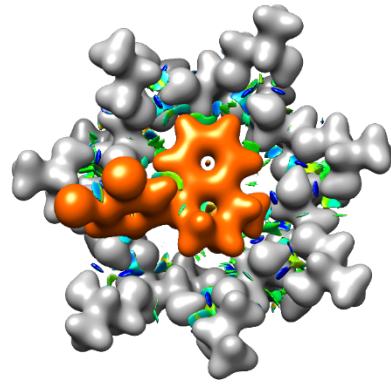

HPβCD:III\_CI2

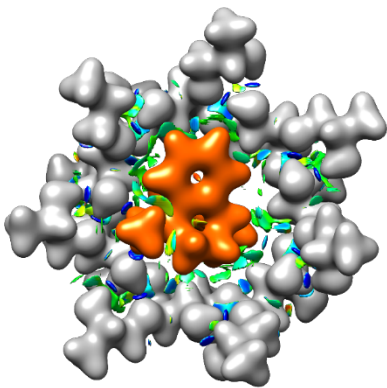

HPβCD:III\_CI3

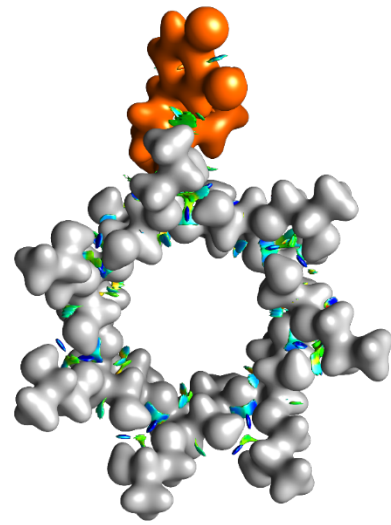

HPβCD:III\_CI4

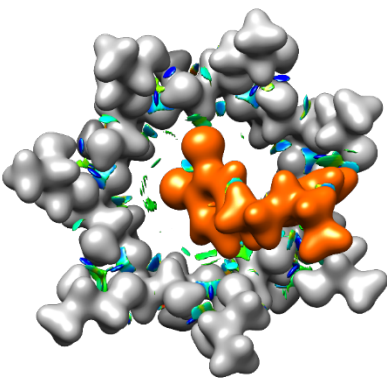

HPβCD:III\_CI5

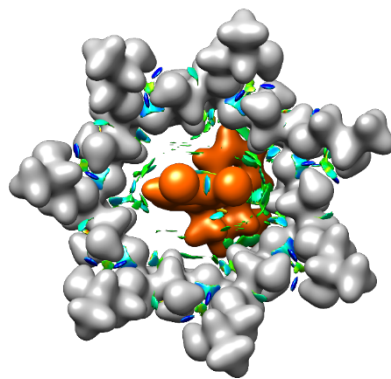

HPβCD:III\_CI6

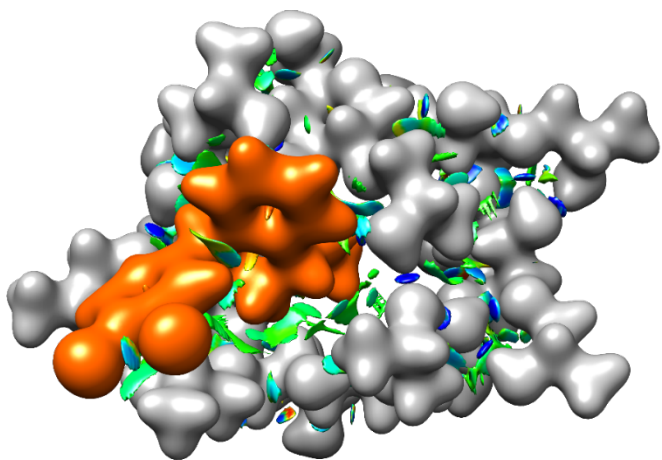

HPβCD:III\_MD1

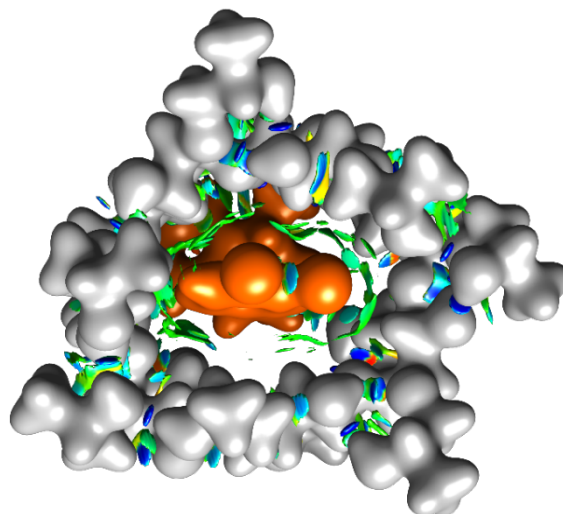

HPβCD:III\_MD2

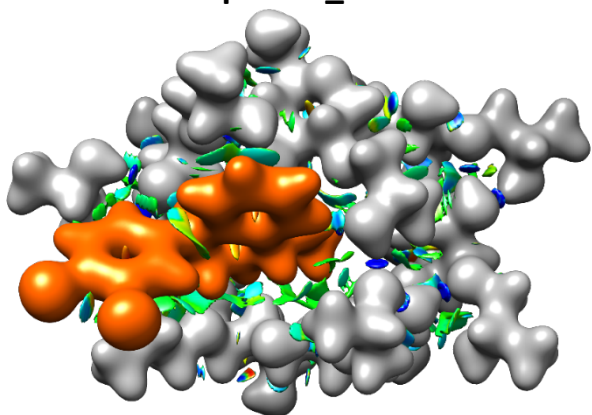

HPβCD:III\_MD3

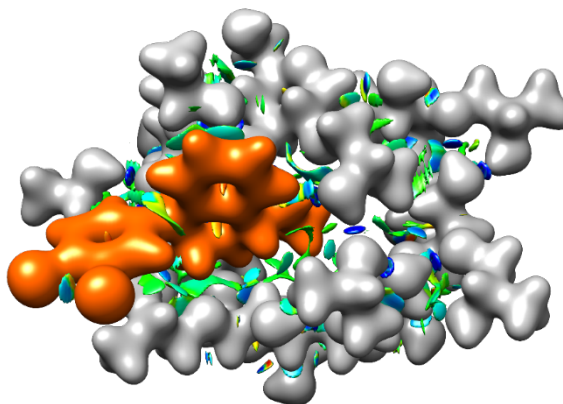

HPβCD:III\_MD4

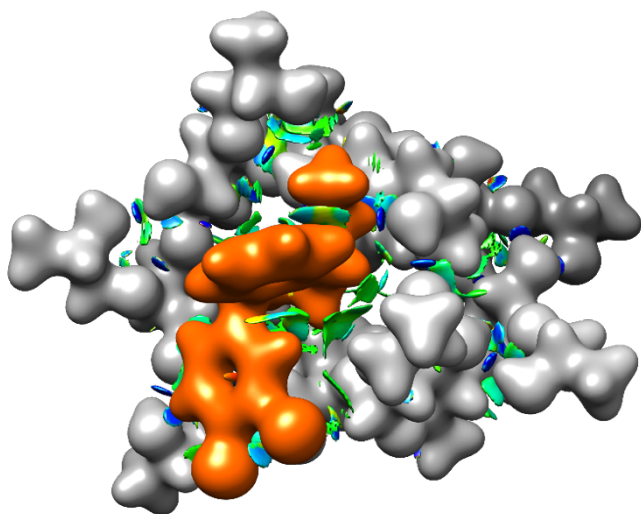

HPβCD:III\_MD5

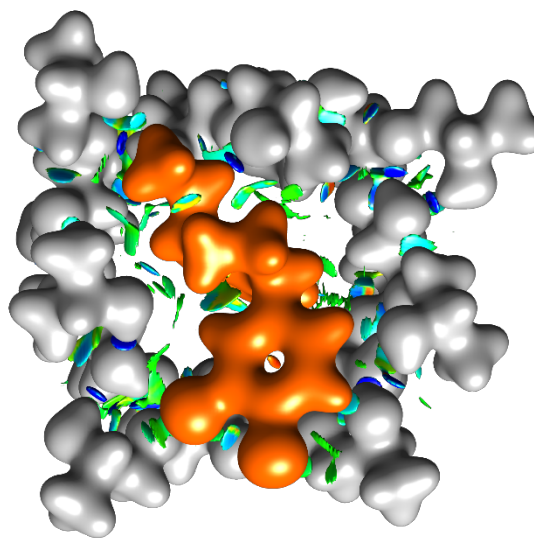

HPβCD:III\_MD6

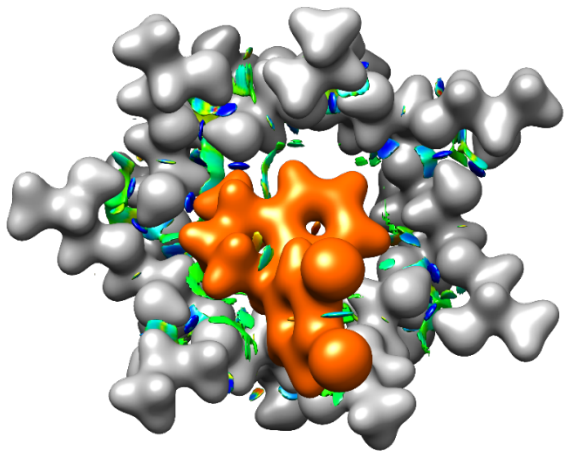

HPβCD:IV\_CI1

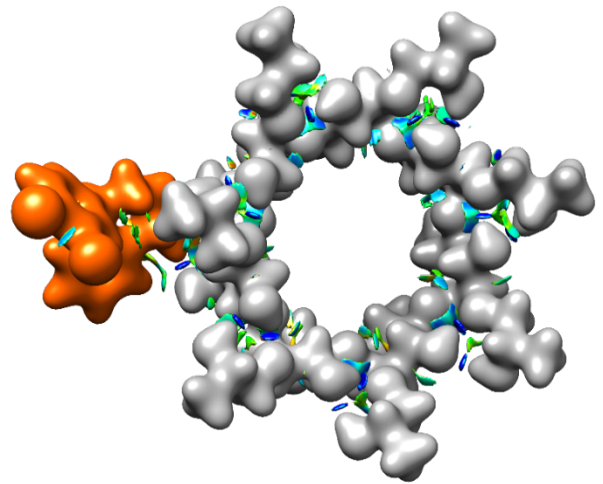

HPβCD:IV\_CI2

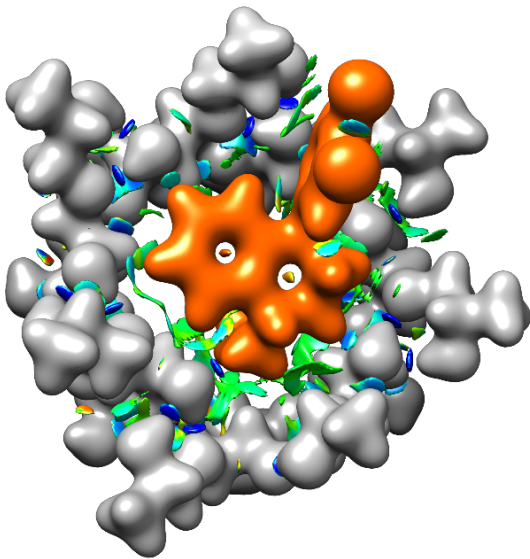

HPβCD:IV\_CI3

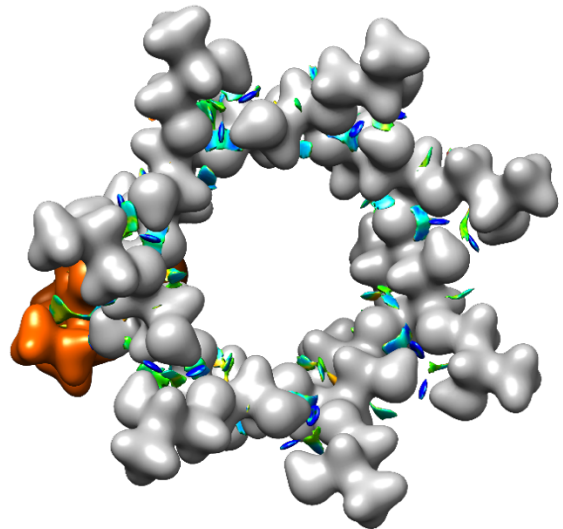

HPβCD:IV\_CI4

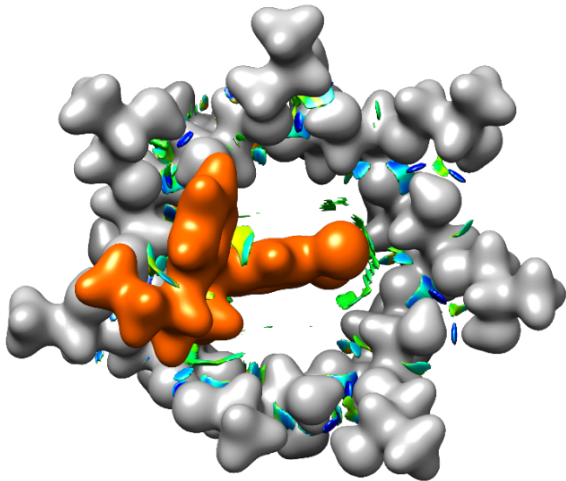

HPβCD:IV\_CI5

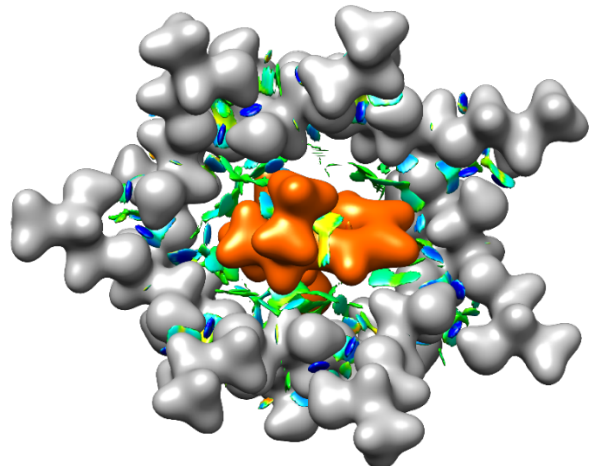

HPβCD:IV\_CI6

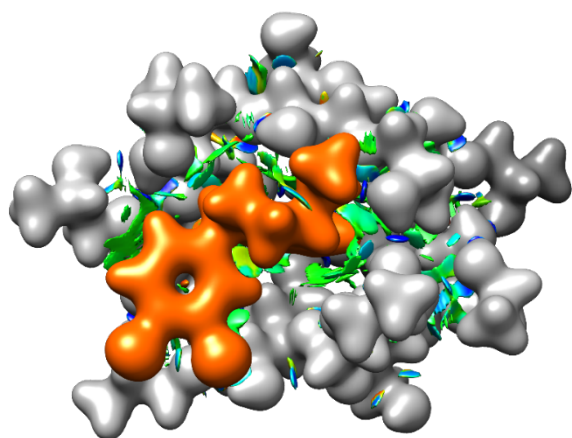

HPβCD:IV\_MD1

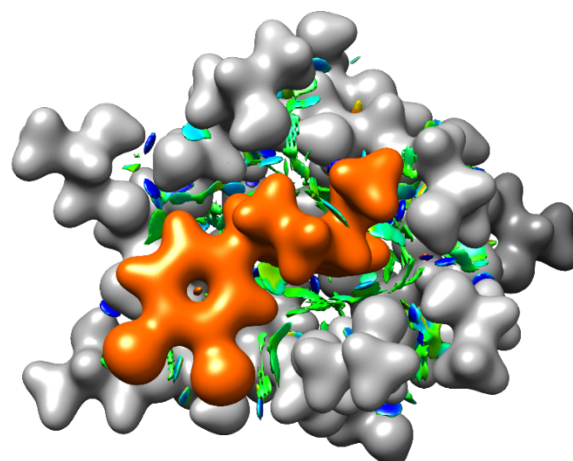

HPβCD:IV\_MD2

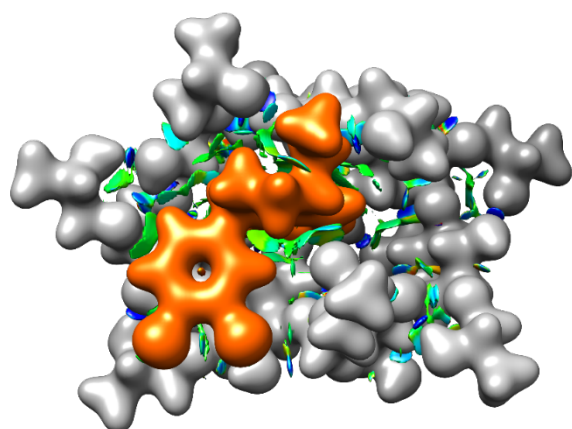

HPβCD:IV\_MD3

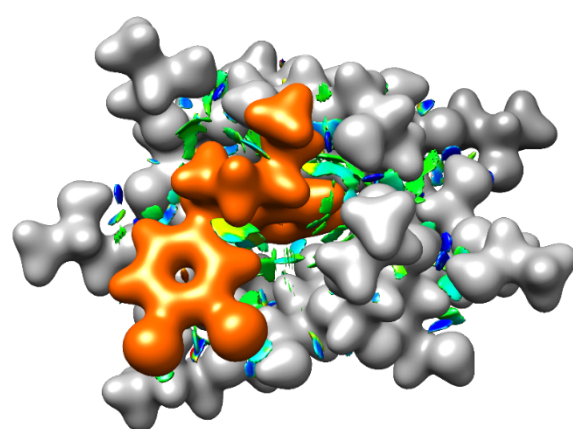

HPβCD:IV\_MD4

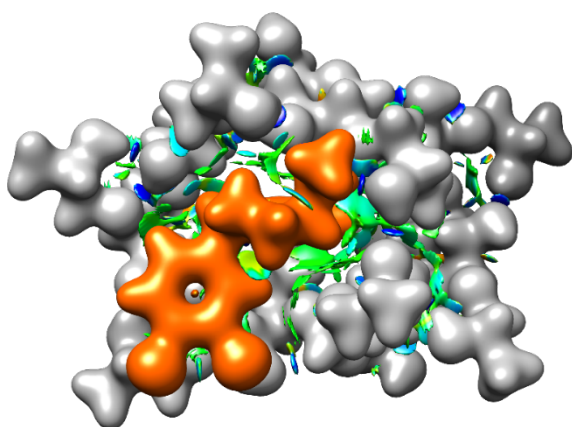

HPβCD:IV\_MD5

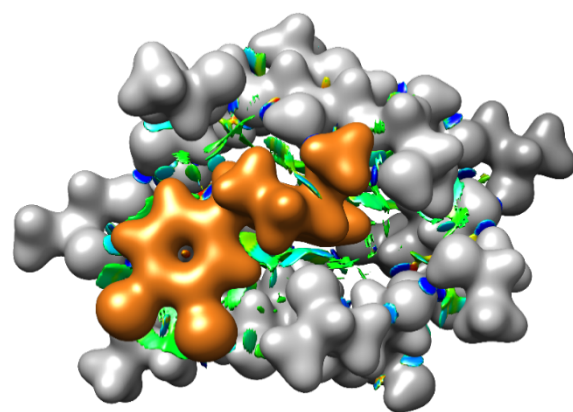

HPβCD:IV\_MD6
